# Supplementary material for: Enantioselective rhodium-catalyzed addition of arylboronic acids to N-heteroaryl ketones: synthesis of α-hydroxy acids
Source: Royal Society of Chemistry journal article supplement (doi:10.1039/d2sc05907j), 2023-01-01

**Support Information**  
**for**  
**Enantioselective Rhodium-Catalyzed Addition of Arylboronic Acids  
to *N*-Heteroaryl Ketones: Synthesis of  $\alpha$ -Hydroxy Acids**

Jinbin Zhu<sup>a\*</sup>, Zhenyue Li<sup>a</sup>, Jiaqi Li<sup>a</sup>, Duanshuai Tian<sup>b</sup>, Ronghua Xu<sup>b</sup>, Zhiyong Tan<sup>a</sup>, Zhengwang Chen<sup>a\*</sup>, and Wenjun Tang<sup>b\*</sup>

<sup>a</sup> Key Laboratory of Organo-Pharmaceutical Chemistry of Jiangxi Province, Gannan Normal University, Ganzhou 341000, China.

<sup>b</sup> State Key Laboratory of Bio-Organic and Natural Products Chemistry, Shanghai Institute of Organic Chemistry, Chinese Academy of Sciences, 345 Ling Ling Rd, Shanghai 200032, China.

E-mail: [zhujinbin@gnnu.edu.cn](mailto:zhujinbin@gnnu.edu.cn), [chenzwang2021@163.com](mailto:chenzwang2021@163.com), [tangwenjun@sioc.ac.cn](mailto:tangwenjun@sioc.ac.cn)

## Table of Contents

|                                                                                                                                         |       |
|-----------------------------------------------------------------------------------------------------------------------------------------|-------|
| 1. General information .....                                                                                                            | SI-2  |
| 2. General procedure of enantioselective Rh-catalyzed addition of arylboron reagents to <i>N</i> -Heteroaryl Ketones .....              | SI-3  |
| 3. Analytical data of the products of enantioselective Rh-catalyzed addition of arylboronic acids to <i>N</i> -Heteroaryl Ketones ..... | SI-4  |
| 4. Synthesis of substrates for enantioselective Rh-catalyzed addition of arylboronic acids to $\alpha$ -Ketobenzoxazoles .....          | SI-23 |
| 5. General procedure of enantioselective Rh-catalyzed addition of arylboronic acids to $\alpha$ -Ketobenzoxazoles .....                 | SI-29 |
| 6. Analytical data of the products of enantioselective Rh-catalyzed addition of arylboronic acids to $\alpha$ -Ketobenzoxazoles .....   | SI-30 |
| 7. General procedure of hydrolysis of chiral tertiary alcohols for synthesis of chiral $\alpha$ -Hydroxy Acids .....                    | SI-55 |
| 8. Analytical data of chiral $\alpha$ -Hydroxy Acids.....                                                                               | SI-56 |
| 9. Transformations of chiral $\alpha$ -Hydroxy Acid .....                                                                               | SI-64 |
| 10. References .....                                                                                                                    | SI-70 |
| 11. NMR Spectra .....                                                                                                                   | SI-71 |

## 1. General information

[Rh(C<sub>2</sub>H<sub>4</sub>)<sub>2</sub>Cl]<sub>2</sub> was purchased from TCI chemical. Ligands (L5, L6, L7) were prepared according to a reported procedure<sup>[1]</sup>. Reagents were purchased at the highest commercial quality and used without further purification, unless otherwise stated. Solvents for chromatography were used as supplied by Adamas-beta®. All reactions were carried out under nitrogen atmosphere unless otherwise specified. Solvents were purified and dried according to standard methods prior to use.

<sup>1</sup>H, <sup>13</sup>C and <sup>19</sup>F NMR data were recorded on a Bruker Avance III 400 NMR and 500 NMR spectrometers with CDCl<sub>3</sub> or DMSO-*d*<sub>6</sub> as the solvent. <sup>1</sup>H shifts were referenced to CDCl<sub>3</sub> at 7.26 ppm, to DMSO-*d*<sub>6</sub> at 2.54 ppm. <sup>13</sup>C shifts were referenced to CDCl<sub>3</sub> at 77 ppm, to DMSO at 40 ppm and obtained with <sup>1</sup>H decoupling. Multiplicities are abbreviated as follows: singlet (s), doublet (d), triplet (t), quartet (q), doublet-doublet (dd), doublet-triplet (dt), doublet-quintet (dq), triplet-doublet (td), quintet (q), multiplet (m), and broad (br). MS was measured on Agilent 1100 Series LC/MSD (ESI) mass spectrometers. Analytical thin layer chromatography (TLC) was performed on precoated silica gel 60 GF254 plates. Flash column chromatography was performed using Jiangyou silical gel (200-300 mesh). Infrared spectra were recorded on a Nicolet IS50 Fourier transform spectrometer (FT-IR) and were reported in wave numbers (cm<sup>-1</sup>). Chiral HPLC analyses were performed on a Shimadzu Essentia SPD - 16 using a chiralcel OD-H, chiralcel AD-H, chiralpak AS-H, chiralpak IA, or chiralpak IC column. The optical rotations were measured on an Anton Paar Modular Circular Polarimeter.

## 2. General procedure for asymmetric addition of arylboron reagents to *N*-Heteroaryl Ketones (General Procedure A).

To a screw-capped tube was charged *N*-heteroaryl ketones (0.20 mmol, 1.0 equiv), arylboron reagents (0.60 mmol, 3.0 equiv “B”), CsF (0.40 mmol, 2.0 equiv), (*S,S,S,S*)-WingPhos (5.3 mg, 0.0072 mmol, 3.6 mol %) and [Rh(C<sub>2</sub>H<sub>4</sub>)<sub>2</sub>Cl]<sub>2</sub> (1.2 mg, 0.0030 mmol, 1.5 mol %). The tube was sealed then evacuated and backfilled with N<sub>2</sub> for three times. B(OMe)<sub>3</sub> (20.8 mg, 0.2 mmol, 1 equiv) was added to the above mixture via microsyringe, and degassed MTBE (3.5 mL) was added via syringe under N<sub>2</sub>. The resulting mixture was stirred at 80 °C under nitrogen for 16 h. After this time, the screw-capped tube was removed from the bath and allowed to cool to room temperature. The heterogenous mixture was diluted with EtOAc (10 mL) and filtered through celite, rinsing the celite plug with EtOAc/MeOH (24/1, v/v, 25 mL). The filtrate was concentrated, and the resulting residue was purified via flash chromatography on silica gel with petroleum ether/ethyl acetate (3/1 → 1/1, v/v), affording the desired alcohol products. The enantiomeric excesses were determined by chiral HPLC on a chiralcel OD-H, chiralcel AD-H, chiralpak AS-H, or chiralpak IC column.

### 3. Analytical data of the products of enantioselective Rh-catalyzed

#### addition of arylboronic acids to *N*-Heteroaryl Ketones.

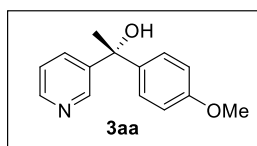

#### **(*R*)-1-(4-methoxyphenyl)-1-(pyridin-3-yl)ethan-1-ol (3aa):**

General Procedure A was followed using 1-(pyridin-3-yl)ethan-1-one (24.2 mg, 0.20 mmol), and (4-methoxyphenyl)boronic acid (91.2 mg, 0.60 mmol). After flash chromatography with petroleum ether/ethyl acetate (3/1 → 1/1, v/v), the desired product was obtained as a colorless solid (41.5 mg, 90% yield, >99% ee). Chiral HPLC conditions: chiralpak AS-H, 25 °C, flow rate: 1.0 mL/min, hexane/isopropanol/ diethylamine: 80/20/0.03, 254 nm, 8.6 min (*R*), 11.8 min (*S*);  $[\alpha]_D^{25} = -52.5^\circ$  ( $c = 0.25$ ,  $\text{CHCl}_3$ );  $^1\text{H}$  NMR (400 MHz,  $\text{Chloroform-}d$ )  $\delta$  8.55 (d,  $J = 2.4$  Hz, 1H), 8.36 - 8.35 (m, 1H), 7.71 (dt,  $J = 8.0$ , 2.0 Hz, 1H), 7.33 - 7.28 (m, 2H), 7.20 - 7.17 (m, 1H), 6.86 - 6.81 (m, 2H), 3.78 (s, 3H), 3.49 (br.s, 1H), 1.92 (s, 3H);  $^{13}\text{C}$  NMR (101 MHz,  $\text{CDCl}_3$ )  $\delta$  158.2, 146.7, 146.6, 144.4, 139.6, 133.8, 126.9, 122.8, 113.2, 73.7, 54.9, 30.4; IR (KBr,  $\text{cm}^{-1}$ ) 3251, 2989, 2957, 2835, 1612, 1576, 1510, 1419, 1253, 1174, 1030, 920, 834, 816, 716; HRMS (ESI):  $m/z$  calcd. for  $[\text{M}+\text{H}, \text{C}_{14}\text{H}_{16}\text{NO}_2]^+$  : 230.1176; found: 230.1183.

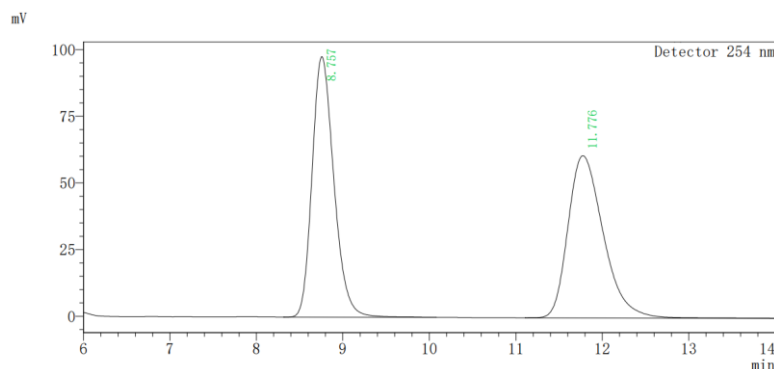

| No.   | Ret. Time (min) | Height | Height% | Area    | Area%   |
|-------|-----------------|--------|---------|---------|---------|
| 1     | 8.757           | 97683  | 61.623  | 1713078 | 49.778  |
| 2     | 11.776          | 60835  | 38.377  | 1728379 | 50.222  |
| Total |                 | 158518 | 100.000 | 3441457 | 100.000 |

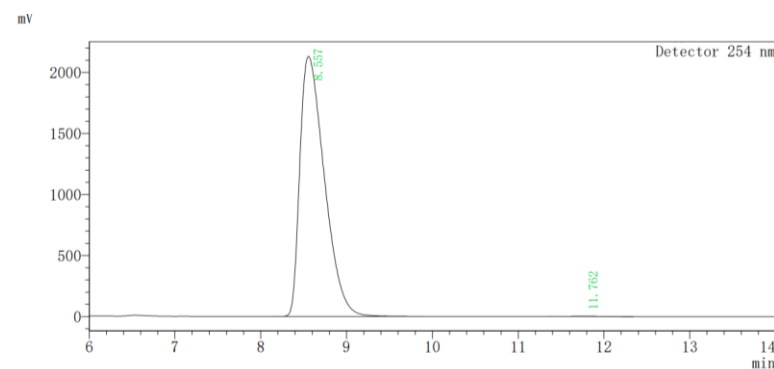

| No.   | Ret. Time (min) | Height  | Height% | Area     | Area%   |
|-------|-----------------|---------|---------|----------|---------|
| 1     | 8.557           | 2130750 | 99.891  | 42205081 | 99.863  |
| 2     | 11.762          | 2330    | 0.109   | 58109    | 0.137   |
| Total |                 | 2133080 | 100.000 | 42263190 | 100.000 |

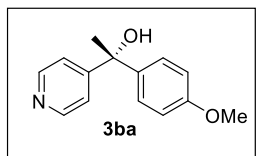

**(*R*)-1-(4-methoxyphenyl)-1-(pyridin-4-yl)ethan-1-ol (3ba):**

General Procedure A was followed using 1-(pyridin-4-yl)ethan-1-one (24.2 mg, 0.20 mmol), and (4-methoxyphenyl)boronic acid (91.2 mg, 0.60 mmol). After flash chromatography with petroleum ether/ethyl acetate (3/1 → 1/1, v/v), the desired product was obtained as a colorless solid (43.2 mg, 94% yield, >99% ee). Chiral HPLC conditions: chiralcel AD-H, 25 °C, flow rate: 1.0 mL/min, hexane/isopropanol /diethylamine: 90/10/0.03, 254 nm, 15.7 min (*R*), 18.1 min (*S*);  $[\alpha]_D^{25} = -25.0^\circ$  ( $c = 0.74$ ,  $\text{CHCl}_3$ );  $^1\text{H}$  NMR (400 MHz,  $\text{DMSO}-d_6$ )  $\delta$  8.48 - 8.42 (m, 2H), 7.40 - 7.36 (m, 2H), 7.36 - 7.31 (m, 2H), 6.91 - 6.78 (m, 2H), 5.84 (s, 1H), 3.71 (s, 3H), 1.80 (s, 3H);  $^{13}\text{C}$  NMR (101 MHz,  $\text{DMSO}$ )  $\delta$  158.7, 158.4, 149.7, 140.5, 127.3, 121.1, 113.7, 73.9, 55.5, 30.1; HRMS (FI):  $m/z$  calcd. for  $[\text{M}, \text{C}_{14}\text{H}_{15}\text{NO}_2]^+$ : 229.1097; found: 229.1093.

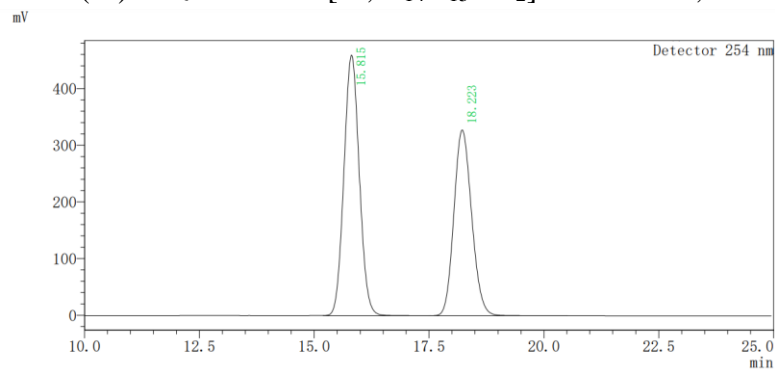

| No.   | Ret. Time (min) | Height | Height% | Area     | Area%   |
|-------|-----------------|--------|---------|----------|---------|
| 1     | 15.815          | 459357 | 58.371  | 10672388 | 54.733  |
| 2     | 18.223          | 327611 | 41.629  | 8826586  | 45.267  |
| Total |                 | 786968 | 100.000 | 19498974 | 100.000 |

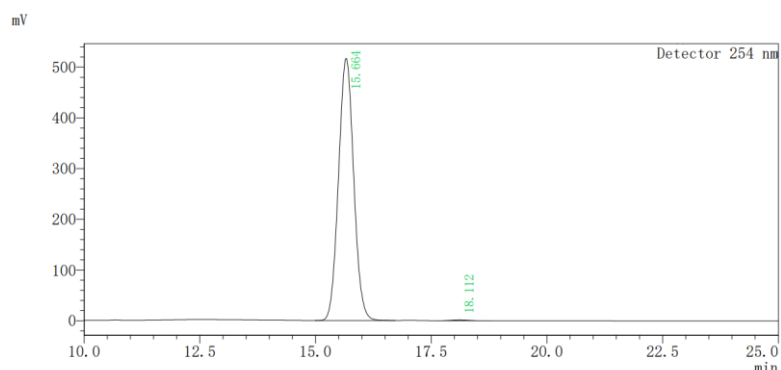

| No.   | Ret. Time (min) | Height | Height% | Area     | Area%   |
|-------|-----------------|--------|---------|----------|---------|
| 1     | 15.664          | 516913 | 99.737  | 11821689 | 99.705  |
| 2     | 18.112          | 1361   | 0.263   | 34938    | 0.295   |
| Total |                 | 518273 | 100.000 | 11856627 | 100.000 |

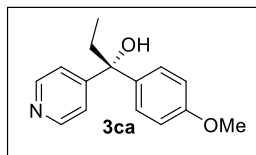

**(*R*)-1-(4-methoxyphenyl)-1-(pyridin-4-yl)propan-1-ol (3ca):**

General Procedure A was followed using 1-(pyridin-4-yl)propan-1-one (27.0 mg, 0.20 mmol) and (4-methoxyphenyl)boronic acid (91.2 mg, 0.60 mmol). After flash chromatography with petroleum ether/ethyl acetate (3/1 → 1/1, v/v), the desired product was obtained as a colorless solid (44.8 mg, 92% yield, >99% ee). Chiral HPLC conditions: chiralcel AD-H, 25 °C, flow rate: 1.0 mL/min, hexane/isopropanol /diethylamine: 90/10/0.03, 254 nm, 14.5 min (*R*), 17.0 min (*S*);  $[\alpha]_D^{25} = -24.8^\circ$  ( $c = 0.49$ ,  $\text{CHCl}_3$ );  $^1\text{H}$  NMR (400 MHz,  $\text{DMSO}-d_6$ )  $\delta$  8.53 - 8.22 (m, 2H), 7.54 - 7.19 (m, 4H), 6.91 - 6.76 (m, 2H), 5.56 (s, 1H), 3.71 (s, 3H), 2.22 (q,  $J = 7.2$  Hz, 2H), 0.74 (t,  $J = 7.2$  Hz, 3H);  $^{13}\text{C}$  NMR (101 MHz,  $\text{DMSO}$ )  $\delta$  158.2, 157.6, 149.6, 139.6, 127.4, 121.4, 113.7, 76.4, 55.4, 33.4, 8.5; IR (KBr,  $\text{cm}^{-1}$ ): 3103, 2964, 2934, 2837, 1601, 1510, 1415, 1256, 1174, 1030, 985, 827, 816, 694; HRMS (ESI):  $m/z$  calcd. for  $[\text{M}+\text{H}, \text{C}_{15}\text{H}_{18}\text{NO}_2]^+$ : 244.1332; found: 244.1337.

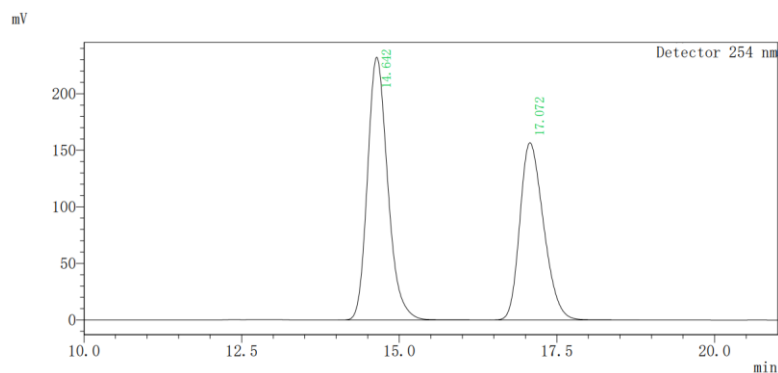

| No.   | Ret. Time (min) | Height | Height% | Area    | Area%   |
|-------|-----------------|--------|---------|---------|---------|
| 1     | 14.642          | 232431 | 59.719  | 5200303 | 55.796  |
| 2     | 17.072          | 156775 | 40.281  | 4119981 | 44.204  |
| Total |                 | 389205 | 100.000 | 9320284 | 100.000 |

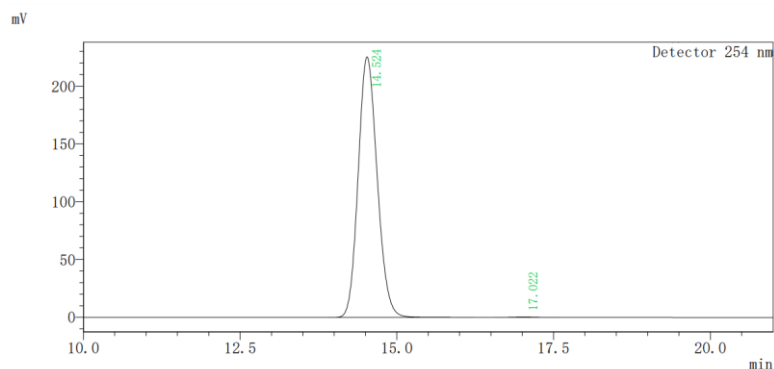

| No.   | Ret. Time (min) | Height | Height% | Area    | Area%   |
|-------|-----------------|--------|---------|---------|---------|
| 1     | 14.524          | 225512 | 99.837  | 4759937 | 99.810  |
| 2     | 17.022          | 368    | 0.163   | 9054    | 0.190   |
| Total |                 | 225880 | 100.000 | 4768990 | 100.000 |

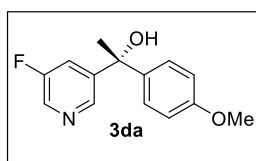

**(*R*)-1-(5-fluoropyridin-3-yl)-1-(4-methoxyphenyl)ethan-1-ol**

**(3da):** General Procedure A was followed using 1-(5-fluoropyridin-3-yl)ethan-1-one (27.8 mg, 0.20 mmol), and (4-methoxyphenyl)boronic acid (91.2 mg, 0.60 mmol). After flash chromatography with petroleum ether/ethyl acetate (3/1

→ 1/1, v/v), the desired product was obtained as a colorless oil (47.3 mg, 95% yield, 99% ee). Chiral HPLC conditions: chiralpak AS-H, 25 °C, flow rate: 1.0 mL/min, hexane/isopropanol/diethylamine: 80/20/0.03, 254 nm, 6.6 min (*R*), 9.0 min (*S*);  $[\alpha]_D^{25} = -22.1^\circ$  ( $c = 0.78$ ,  $\text{CHCl}_3$ );  $^1\text{H}$  NMR (400 MHz,  $\text{CHloroform-}d$ )  $\delta$  8.28 (t,  $J = 1.7$  Hz, 1H), 8.14 (d,  $J = 2.7$  Hz, 1H), 7.52 (dt,  $J = 9.8, 2.3$  Hz, 1H), 7.36 - 7.25 (m, 2H), 6.91 - 6.79 (m, 2H), 4.32 (br.s, 0.88H), 3.79 (s, 3H), 1.91 (s, 3H);  $^{13}\text{C}$  NMR (101 MHz,  $\text{CHloroform-}d$ )  $\delta$  159.2 (d,  $J = 256.2$  Hz), 158.8, 146.5 (d,  $J = 2.8$  Hz), 143.0 (d,  $J = 3.9$  Hz), 138.7, 135.5 (d,  $J = 23.6$  Hz), 127.0, 120.7 (d,  $J = 18.9$  Hz), 113.7, 73.8, 55.2, 30.6;  $^{19}\text{F}$  NMR (377 MHz,  $\text{CDCl}_3$ )  $\delta$  -126.9 (s, 1F); IR (KBr,  $\text{cm}^{-1}$ ): 3242, 2977, 2935, 2837, 1611, 1511, 1420, 1301, 1255, 1180, 1030, 897, 835, 709; HRMS (ESI):  $m/z$  calcd. for  $[\text{M}+\text{H}, \text{C}_{14}\text{H}_{15}\text{FNO}_2]^+$ : 248.1081; found: 248.1087.

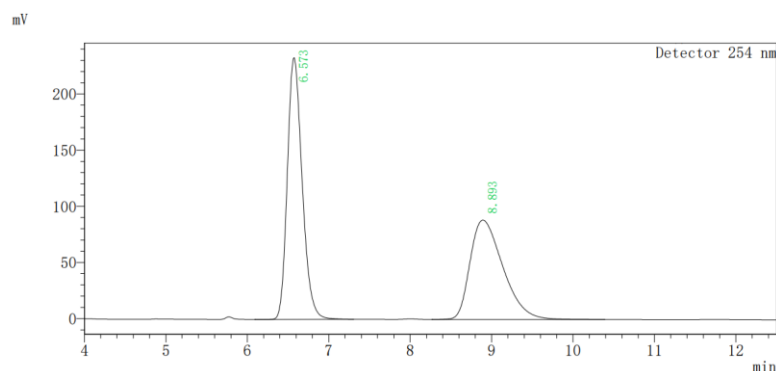

| No.   | Ret. Time (min) | Height | Height% | Area    | Area%   |
|-------|-----------------|--------|---------|---------|---------|
| 1     | 6.573           | 233012 | 72.462  | 2953225 | 54.317  |
| 2     | 8.893           | 88554  | 27.538  | 2483836 | 45.683  |
| Total |                 | 321566 | 100.000 | 5437061 | 100.000 |

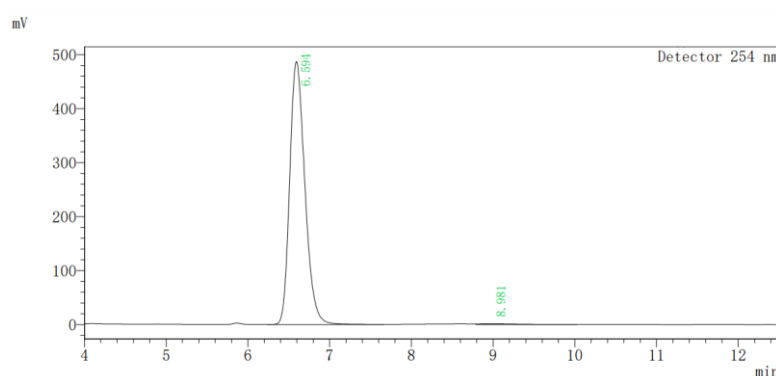

| No.   | Ret. Time (min) | Height | Height% | Area    | Area%   |
|-------|-----------------|--------|---------|---------|---------|
| 1     | 6.594           | 487326 | 99.732  | 6298669 | 99.253  |
| 2     | 8.981           | 1312   | 0.268   | 47418   | 0.747   |
| Total |                 | 488637 | 100.000 | 6346087 | 100.000 |

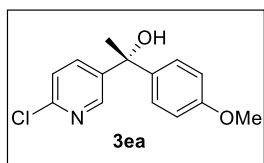

**(R)-1-(6-chloropyridin-3-yl)-1-(4-methoxyphenyl)ethan-1-ol (3ea):** General Procedure A was followed using 1-(6-chloropyridin-3-yl)ethan-1-one (31.0 mg, 0.20 mmol), and (4-methoxyphenyl)boronic acid (91.2 mg, 0.60 mmol).

After flash chromatography with petroleum ether/ethyl acetate (3/1 → 1/1, v/v), the desired product was obtained as a colorless solid (50.2 mg, 95% yield, 98% ee). Chiral HPLC conditions: chiralpak AS-H, 25 °C, flow rate: 1.0 mL/min, hexane/isopropanol/diethylamine: 80/20/0.03, 254 nm, 8.5 min (*R*), 13.8 min (*S*);  $[\alpha]_D^{25} = -46.2^\circ$  ( $c = 0.10$ ,  $\text{CHCl}_3$ );  $^1\text{H}$  NMR (400 MHz,  $\text{CHloroform}-d$ )  $\delta$  8.37 (d,  $J = 2.5$  Hz, 1H), 7.66 - 7.64 (m, 1H), 7.32 - 7.27 (m, 2H), 7.23 - 7.21 (m, 1H), 6.94 - 6.76 (m, 2H), 3.79 (s, 3H), 2.64 (br.s, 1H), 1.92 (s, 3H);  $^{13}\text{C}$  NMR (101 MHz,  $\text{CDCl}_3$ )  $\delta$  158.9, 149.7, 147.3, 142.8, 138.7, 136.7, 127.1, 123.5, 113.8, 74.3, 55.3, 30.8; IR (KBr,  $\text{cm}^{-1}$ ): 3361, 2975, 2934, 2836, 1608, 1583, 1511, 1461, 1372, 1251, 1108, 1028, 916, 832, 746; HRMS (ESI):  $m/z$  calcd. for  $[\text{M}+\text{H}, \text{C}_{14}\text{H}_{15}\text{ClNO}_2]^+$  : 264.0786; found: 264.0787.

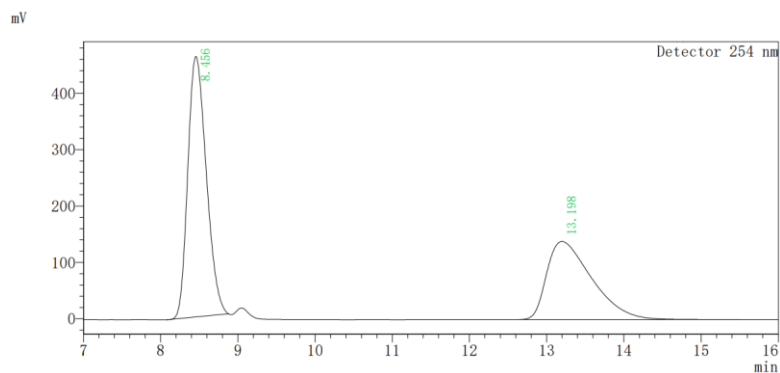

| No.   | Ret. Time (min) | Height | Height% | Area     | Area%   |
|-------|-----------------|--------|---------|----------|---------|
| 1     | 8.456           | 461807 | 76.938  | 7689082  | 57.851  |
| 2     | 13.198          | 138424 | 23.062  | 5602132  | 42.149  |
| Total |                 | 600231 | 100.000 | 13291213 | 100.000 |

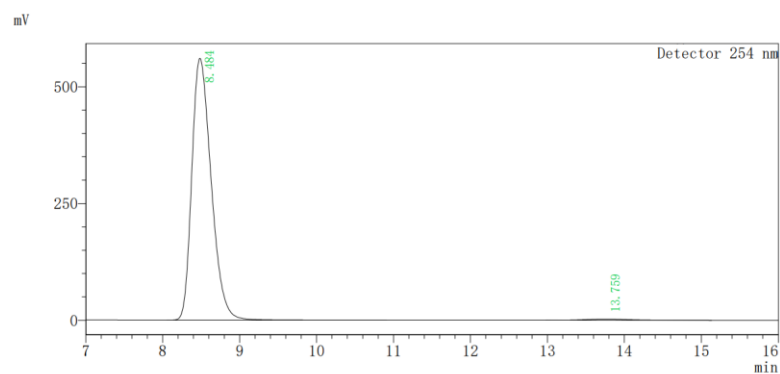

| No.   | Ret. Time (min) | Height | Height% | Area    | Area%   |
|-------|-----------------|--------|---------|---------|---------|
| 1     | 8.484           | 560780 | 99.509  | 9844257 | 98.907  |
| 2     | 13.759          | 2766   | 0.491   | 108751  | 1.093   |
| Total |                 | 563546 | 100.000 | 9953008 | 100.000 |

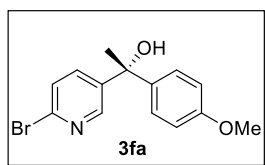

**(R)-1-(6-bromopyridin-3-yl)-1-(4-methoxyphenyl)ethan-1-ol (3fa):** General Procedure A was followed using 1-(6-bromopyridin-3-yl)ethan-1-one (39.8 mg, 0.20 mmol), and (4-methoxyphenyl)boronic acid (91.2 mg, 0.60 mmol).

After flash chromatography with petroleum ether/ethyl acetate (3/1 → 1/1, v/v), the desired product was obtained as a colorless oil (57.8 mg, 94% yield, 98% ee). Chiral HPLC conditions: chiralpak AS-H, 25 °C, flow rate: 1.0 mL/min, hexane/isopropanol/diethylamine: 80/20/0.03, 254 nm, 8.8 min (*R*), 14.8 min (*S*);  $[\alpha]_D^{25} = -24.7^\circ$  ( $c = 0.55$ ,  $\text{CHCl}_3$ );  $^1\text{H}$  NMR (400 MHz,  $\text{CHloroform-}d$ )  $\delta$  8.40 (d,  $J = 2.5$  Hz, 1H), 7.56 - 7.54 (m, 1H), 7.40 - 7.38 (m, 1H), 7.33 - 7.27 (m, 2H), 6.92 - 6.81 (m, 2H), 3.80 (s, 3H), 2.32 (br.s, 1H), 1.93 (s, 3H);  $^{13}\text{C}$  NMR (101 MHz,  $\text{CDCl}_3$ )  $\delta$  158.6, 147.7, 143.4, 139.8, 138.6, 136.6, 127.2, 127.0, 113.6, 74.0, 55.1, 30.5; HRMS (ESI):  $m/z$  calcd. for  $[\text{M}+\text{H}, \text{C}_{14}\text{H}_{15}\text{BrNO}_2]^+$ : 308.0281; found: 308.0286.

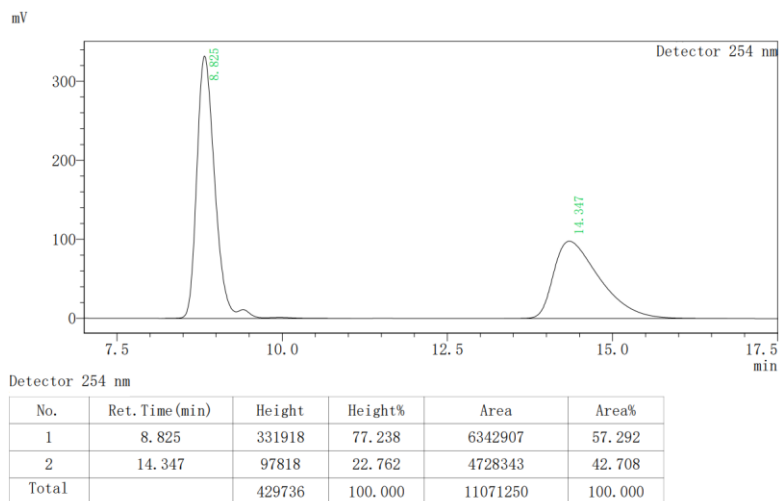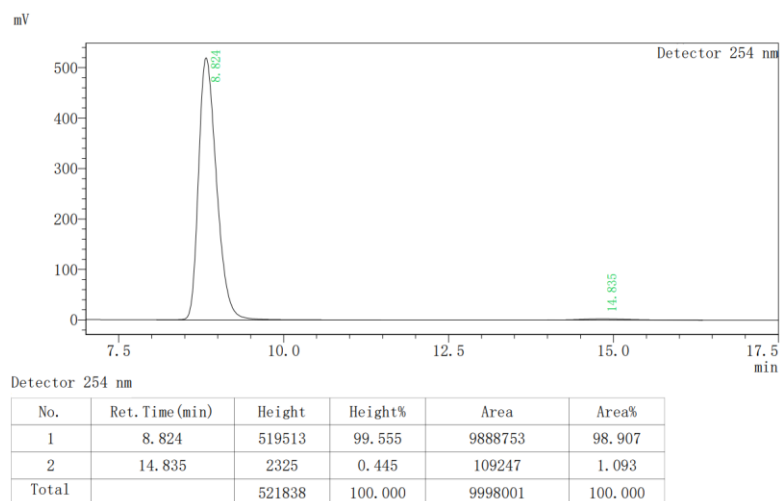

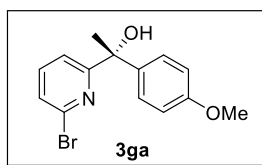

**(R)-1-(6-bromopyridin-2-yl)-1-(4-methoxyphenyl)ethan-1-ol (3ga):**

General Procedure A was followed using 1-(6-bromopyridin-2-yl)ethan-1-one (39.8 mg, 0.20 mmol), and (4-methoxyphenyl)boronic acid (91.2 mg, 0.60 mmol).

After flash chromatography with petroleum ether/ethyl acetate (3/1 → 1/1, v/v), the desired product was obtained as a colorless oil (57.3 mg, 93% yield, 99% ee). Chiral HPLC conditions: chiralpak IC, 25 °C, flow rate: 1.0 mL/min, hexane /isopropanol/diethylamine: 80/20/0.03, 254 nm, 6.4 min (*S*), 9.1 min (*R*);  $[\alpha]_D^{25} = -115.0^\circ$  ( $c = 0.92$ ,  $\text{CHCl}_3$ );  $^1\text{H}$  NMR (400 MHz,  $\text{CHloroform-}d$ )  $\delta$  7.49 - 7.45 (m, 1H), 7.41 - 7.31 (m, 3H), 7.21 - 7.19 (m, 1H), 6.88 - 6.81 (m, 2H), 4.95 (br.s, 1H), 3.78 (s, 3H), 1.89 (s, 3H);  $^{13}\text{C}$  NMR (101 MHz,  $\text{CDCl}_3$ )  $\delta$  167.0, 158.6, 140.3, 139.1, 138.3, 127.1, 126.2, 119.0, 113.5, 75.0, 55.2, 29.4; HRMS (ESI):  $m/z$  calcd. for  $[\text{M}+\text{Na}, \text{C}_{14}\text{H}_{14}\text{BrNNaO}_2]^+$ : 330.0100; found: 330.0107.

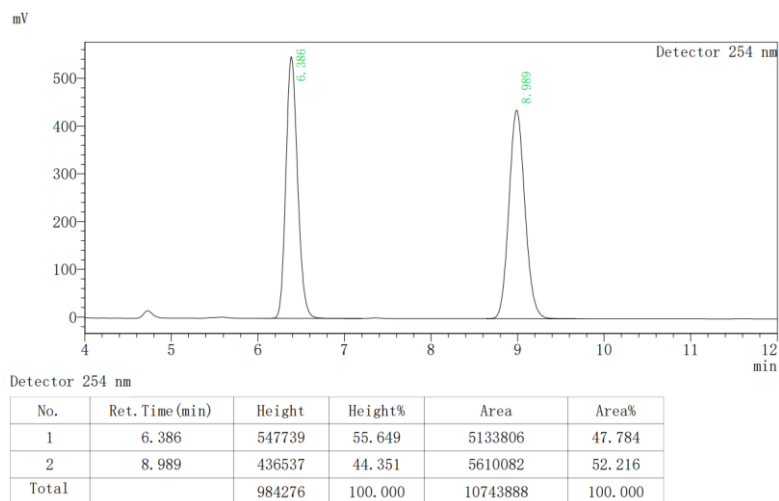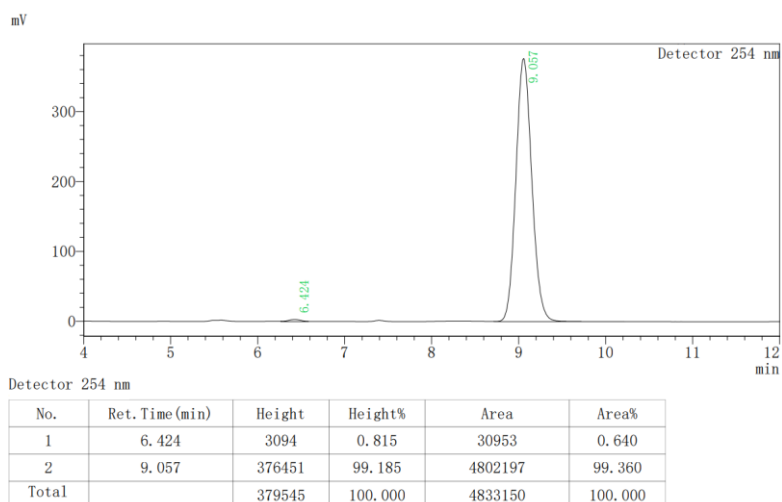

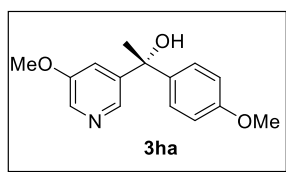

**(R)-1-(4-methoxyphenyl)-1-(5-methoxypyridin-3-yl)ethan-1-ol (3ha):** General Procedure A was followed using 1-(5-methoxypyridin-3-yl)ethan-1-one (30.2 mg, 0.20 mmol) and (4-methoxyphenyl)boronic acid (91.2 mg, 0.60 mmol).

After flash chromatography with petroleum ether/ethyl acetate (3/1 → 1/1, v/v), the desired product was obtained as a colorless oil (46.6 mg, 90% yield, 99% ee). Chiral HPLC conditions: chiralcel OD-H, 25 °C, flow rate: 1.0 mL/min, hexane/isopropanol/diethylamine: 80/20/0.03, 254 nm, 7.8 min (*R*), 9.0 min (*S*);  $[\alpha]_D^{25} = -34.7^\circ$  ( $c = 0.54$ , CHCl<sub>3</sub>); <sup>1</sup>H NMR (400 MHz, Chloroform-*d*)  $\delta$  8.00 (d,  $J = 1.9$  Hz, 1H), 7.87 (d,  $J = 2.8$  Hz, 1H), 7.31 (t,  $J = 2.3$  Hz, 1H), 7.28 - 7.23 (m, 2H), 6.86 - 6.66 (m, 2H), 4.95 (br.s, 1H), 3.72 (d,  $J = 7.5$  Hz, 6H), 1.84 (s, 3H); <sup>13</sup>C NMR (101 MHz, CDCl<sub>3</sub>)  $\delta$  158.4, 155.3, 145.4, 139.5, 139.2, 134.2, 127.0, 118.8, 113.4, 73.8, 55.3, 55.0, 30.5; IR (KBr, cm<sup>-1</sup>): 3206, 2972, 2933, 2837, 1609, 1583, 1510, 1456, 1423, 1282, 1250, 1178, 1035, 874, 835, 713; HRMS (ESI):  $m/z$  calcd. for [M+H, C<sub>15</sub>H<sub>18</sub>NO<sub>3</sub>]<sup>+</sup> : 260.1281; found: 260.1287.

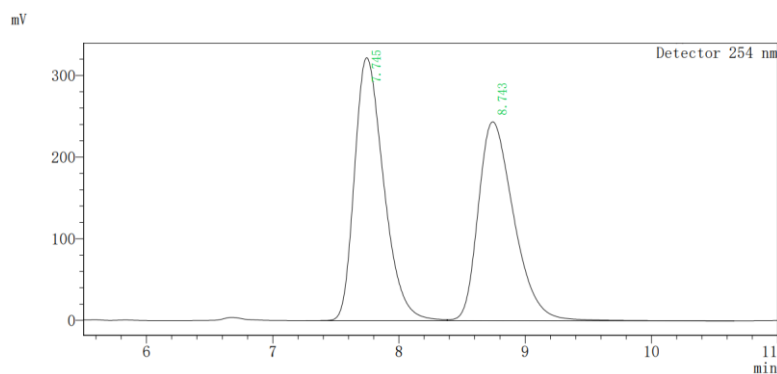

| No.   | Ret. Time (min) | Height | Height% | Area    | Area%   |
|-------|-----------------|--------|---------|---------|---------|
| 1     | 7.745           | 321957 | 56.906  | 5181526 | 52.010  |
| 2     | 8.743           | 243815 | 43.094  | 4780944 | 47.990  |
| Total |                 | 565773 | 100.000 | 9962470 | 100.000 |

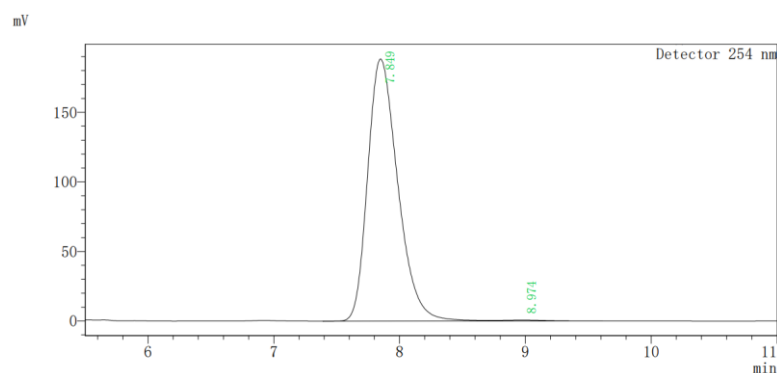

| No.   | Ret. Time (min) | Height | Height% | Area    | Area%   |
|-------|-----------------|--------|---------|---------|---------|
| 1     | 7.849           | 188445 | 99.619  | 3142158 | 99.409  |
| 2     | 8.974           | 720    | 0.381   | 18670   | 0.591   |
| Total |                 | 189165 | 100.000 | 3160829 | 100.000 |

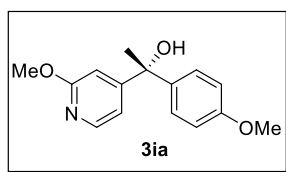

**(*R*)-1-(4-methoxyphenyl)-1-(2-methoxypyridin-4-yl)ethan-1-ol (3ia):** General Procedure A was followed using 1-(2-methoxypyridin-4-yl)ethan-1-one (30.2 mg, 0.20 mmol) and (4-methoxyphenyl)boronic acid (91.2 mg, 0.60 mmol).

After flash chromatography with petroleum ether/ethyl acetate (3/1 → 1/1, v/v), the desired product was obtained as a colorless solid (48.0 mg, 92% yield, >99% ee). Chiral HPLC conditions: chiralpak AS-H, 25 °C, flow rate: 1.0 mL/min, hexane/isopropanol/diethylamine: 80/20/0.03, 254 nm, 10.1 min (*S*), 12.5 min (*R*);  $[\alpha]_D^{25} = -52.6^\circ$  ( $c = 0.40$ ,  $\text{CHCl}_3$ );  $^1\text{H}$  NMR (400 MHz,  $\text{CHloroform-}d$ )  $\delta$  8.03 - 7.99 (m, 1H), 7.32 - 7.27 (m, 2H), 6.85 - 6.80 (m, 4H), 3.89 (s, 3H), 3.76 (s, 3H), 2.66 (br.s, 1H), 1.86 (s, 3H);  $^{13}\text{C}$  NMR (101 MHz,  $\text{CDCl}_3$ )  $\delta$  164.3, 160.1, 158.6, 146.4, 138.6, 127.0, 114.5, 113.5, 107.4, 74.9, 55.1, 53.4, 29.9; IR (KBr,  $\text{cm}^{-1}$ ): 3183, 2972, 2935, 2840, 1602, 1512, 1463, 1382, 1299, 1246, 1165, 1029, 896, 840, 767; HRMS (ESI):  $m/z$  calcd. for  $[\text{M}+\text{H}, \text{C}_{15}\text{H}_{18}\text{NO}_3]^+$ : 260.1281; found: 260.1287.

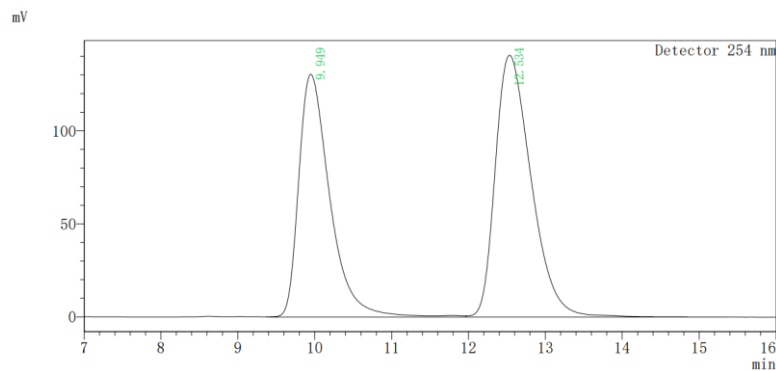

| No.   | Ret. Time (min) | Height | Height% | Area    | Area%   |
|-------|-----------------|--------|---------|---------|---------|
| 1     | 9.949           | 130373 | 48.108  | 3673166 | 44.579  |
| 2     | 12.534          | 140626 | 51.892  | 4566507 | 55.421  |
| Total |                 | 270998 | 100.000 | 8239674 | 100.000 |

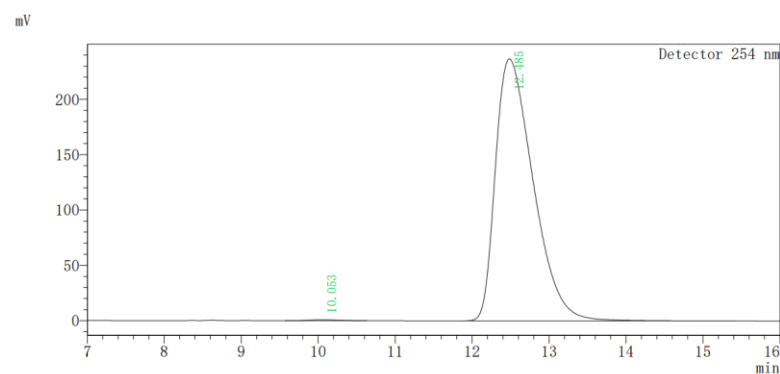

| No.   | Ret. Time (min) | Height | Height% | Area    | Area%   |
|-------|-----------------|--------|---------|---------|---------|
| 1     | 10.053          | 755    | 0.318   | 18037   | 0.223   |
| 2     | 12.485          | 236589 | 99.682  | 8062668 | 99.777  |
| Total |                 | 237344 | 100.000 | 8080705 | 100.000 |

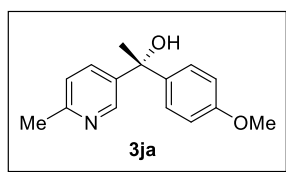

**(*R*)-1-(4-methoxyphenyl)-1-(6-methylpyridin-3-yl)ethan-1-ol (3ja):** General Procedure A was followed using 1-(6-methylpyridin-3-yl)ethan-1-one (27.0 mg, 0.20 mmol) and (4-methoxyphenyl)boronic acid (91.2 mg, 0.60 mmol).

After flash chromatography with petroleum ether/ethyl acetate (3/1 → 1/1, v/v), the desired product was obtained as a colorless solid (31.4 mg, 64% yield, >99% ee). Chiral HPLC conditions: chiralpak AS-H, 25 °C, flow rate: 1.0 mL/min, hexane/isopropanol/diethylamine: 80/20/0.03, 254 nm, 6.8 min (*R*), 11.0 min (*S*);  $[\alpha]_D^{25} = -23.3^\circ$  ( $c = 0.13$ ,  $\text{CHCl}_3$ );  $^1\text{H}$  NMR (400 MHz,  $\text{CHloroform-}d$ )  $\delta$  8.49 (d,  $J = 2.2$  Hz, 1H), 7.60 - 7.58 (m, 1H), 7.36 - 7.27 (m, 2H), 7.07 (d,  $J = 8.1$  Hz, 1H), 6.90 - 6.78 (m, 2H), 3.79 (s, 3H), 2.60 (br.s, 0.74H), 2.51 (s, 3H), 1.92 (s, 3H);  $^{13}\text{C}$  NMR (101 MHz,  $\text{CDCl}_3$ )  $\delta$  158.6, 156.5, 146.5, 140.8, 139.6, 134.2, 127.0, 122.6, 113.6, 74.4, 55.2, 30.8, 23.8; IR (KBr,  $\text{cm}^{-1}$ ): 3166, 3002, 2966, 2833, 1610, 1511, 1377, 1296, 1248, 1182, 1100, 1032, 924, 835, 767; HRMS (ESI):  $m/z$  calcd. for  $[\text{M}+\text{H}, \text{C}_{15}\text{H}_{18}\text{NO}_2]^+$ : 244.1332; found: 244.1337.

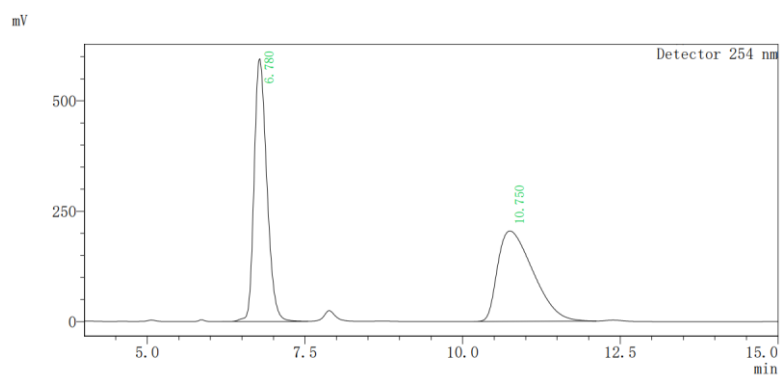

| No.   | Ret. Time (min) | Height | Height% | Area     | Area%   |
|-------|-----------------|--------|---------|----------|---------|
| 1     | 6.780           | 595011 | 74.390  | 8360407  | 51.104  |
| 2     | 10.750          | 204844 | 25.610  | 7999197  | 48.896  |
| Total |                 | 799855 | 100.000 | 16359604 | 100.000 |

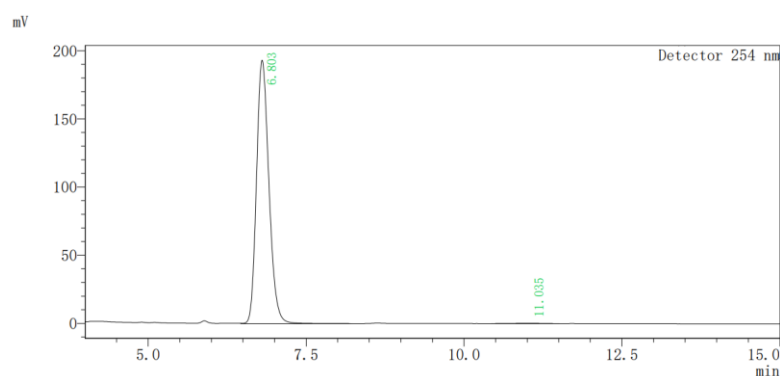

| No.   | Ret. Time (min) | Height | Height% | Area    | Area%   |
|-------|-----------------|--------|---------|---------|---------|
| 1     | 6.803           | 193088 | 99.890  | 2638978 | 99.740  |
| 2     | 11.035          | 213    | 0.110   | 6882    | 0.260   |
| Total |                 | 193301 | 100.000 | 2645859 | 100.000 |

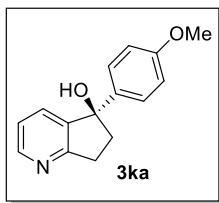

**(*R*)-5-(4-methoxyphenyl)-6,7-dihydro-5H-cyclopenta[*b*]pyridin-5-ol (3ka):** General Procedure A was followed using 6,7-dihydro-5H-cyclopenta[*b*]pyridin-5-one (26.6 mg, 0.20 mmol) and (4-methoxyphenyl)boronic acid (91.2 mg, 0.60 mmol). After flash chromatography with petroleum ether/ethyl acetate (3/1 → 1/1, v/v), the desired product was obtained as a colorless solid (32.3 mg, 67% yield, 97% ee). Chiral HPLC conditions: chiralpak AS-H, 25 °C, flow rate: 1.0 mL/min, hexane /isopropanol/diethylamine: 80/20/0.03, 254 nm, 7.5 min (*R*), 12.1 min (*S*);  $[\alpha]_D^{25} = -10.2^\circ$  ( $c = 0.54$ ,  $\text{CHCl}_3$ );  $^1\text{H}$  NMR (400 MHz,  $\text{CHCl}_3$ )  $\delta$  8.44 (d,  $J = 4.7$  Hz, 1H), 7.45 - 7.43 (m, 1H), 7.31 - 7.24 (m, 2H), 7.14 - 7.10 (m, 1H), 6.89 - 6.83 (m, 2H), 3.80 (s, 3H), 3.27 - 3.16 (m, 1H), 3.06 - 2.98 (m, 1H), 2.89 (br.s, 1H), 2.60 - 2.42 (m, 2H);  $^{13}\text{C}$  NMR (101 MHz,  $\text{CDCl}_3$ )  $\delta$  164.5, 158.7, 149.4, 141.5, 138.1, 132.4, 126.7, 121.9, 113.5, 83.2, 55.2, 42.8, 31.6; IR (KBr,  $\text{cm}^{-1}$ ): 3390, 3001, 2956, 2835, 1613, 1587, 1511, 1421, 1355, 1249, 1171, 1034, 917, 834, 716; HRMS (ESI):  $m/z$  calcd. for  $[\text{M}+\text{H}, \text{C}_{15}\text{H}_{16}\text{NO}_2]^+$  : 242.1176; found: 242.1174.

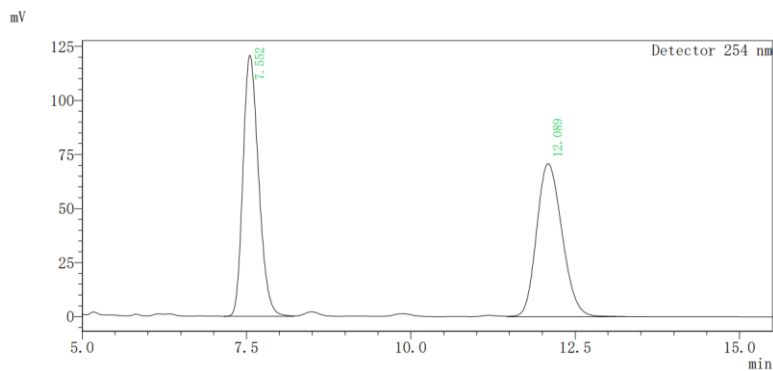

| No.   | Ret. Time (min) | Height | Height% | Area    | Area%   |
|-------|-----------------|--------|---------|---------|---------|
| 1     | 7.552           | 120701 | 63.037  | 1997607 | 51.162  |
| 2     | 12.089          | 70775  | 36.963  | 1906890 | 48.838  |
| Total |                 | 191475 | 100.000 | 3904497 | 100.000 |

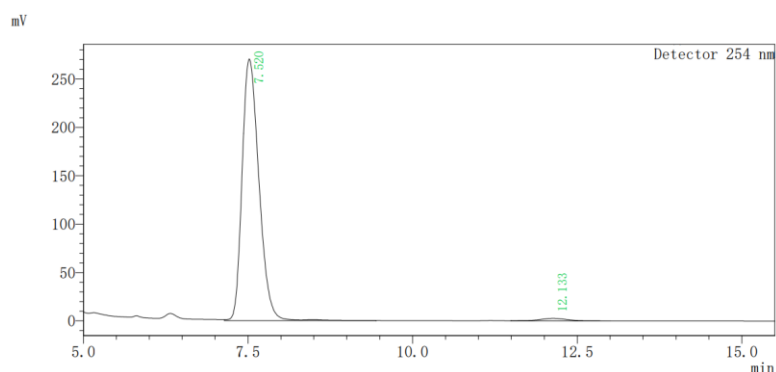

| No.   | Ret. Time (min) | Height | Height% | Area    | Area%   |
|-------|-----------------|--------|---------|---------|---------|
| 1     | 7.520           | 270329 | 99.059  | 4819991 | 98.529  |
| 2     | 12.133          | 2569   | 0.941   | 71950   | 1.471   |
| Total |                 | 272898 | 100.000 | 4891942 | 100.000 |

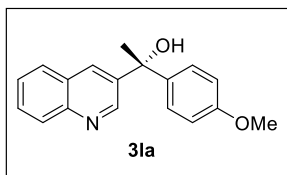

**(R)-1-(4-methoxyphenyl)-1-(quinolin-3-yl)ethan-1-ol**

**(3la):** General Procedure A was followed using 1-(quinolin-3-yl)ethan-1-one (34.2 mg, 0.20 mmol) and (4-methoxyphenyl)boronic acid (91.2 mg, 0.60 mmol).

After flash chromatography with petroleum ether/ethyl acetate (3/1 → 1/1, v/v), the desired product was obtained as a colorless solid (52.3 mg, 93% yield, 98% ee). Chiral HPLC conditions: chiralpak AS-H, 25 °C, flow rate: 1.0 mL/min, hexane /isopropanol/diethylamine: 80/20/0.03, 254 nm, 8.6 min (*R*), 9.6 min (*S*);  $[\alpha]_D^{25} = -54.8^\circ$  ( $c = 0.45$ ,  $\text{CHCl}_3$ );  $^1\text{H}$  NMR (400 MHz,  $\text{CHloroform-}d$ )  $\delta$  8.67 (d,  $J = 2.3$  Hz, 1H), 8.23 (d,  $J = 2.3$  Hz, 1H), 8.01 - 7.99 (m, 1H), 7.73 - 7.71 (m, 1H), 7.65 - 7.56 (m, 1H), 7.51 - 7.44 (m, 1H), 7.34 - 7.28 (m, 2H), 6.83 - 6.75 (m, 2H), 4.61 (br.s, 1H), 3.74 (s, 3H), 1.96 (s, 3H);  $^{13}\text{C}$  NMR (101 MHz,  $\text{CDCl}_3$ )  $\delta$  158.5, 149.6, 146.1, 141.3, 139.2, 131.8, 129.1, 128.3, 127.9, 127.4, 127.2, 126.6, 113.5, 74.3, 55.1, 30.5; IR (KBr,  $\text{cm}^{-1}$ ): 3192, 2976, 2931, 2838, 1609, 1514, 1495, 1372, 1253, 1178, 1028, 914, 835, 757; HRMS (ESI):  $m/z$  calcd. for  $[\text{M}+\text{H}, \text{C}_{18}\text{H}_{18}\text{NO}_2]^+$  : 280.1332; found: 280.1335.

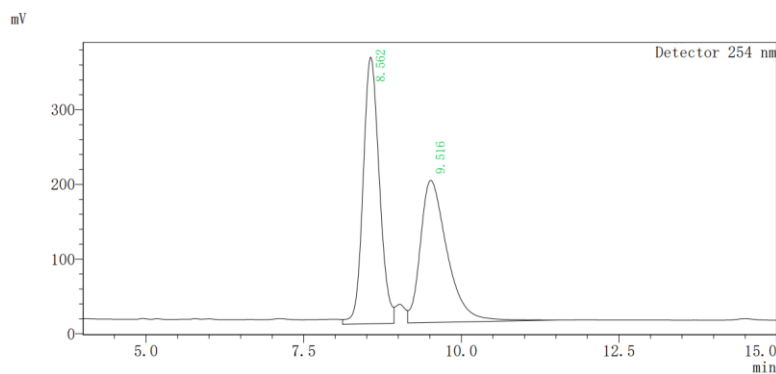

| No.   | Ret. Time (min) | Height | Height% | Area     | Area%   |
|-------|-----------------|--------|---------|----------|---------|
| 1     | 8.562           | 356881 | 65.204  | 6401452  | 53.152  |
| 2     | 9.516           | 190447 | 34.796  | 5642229  | 46.848  |
| Total |                 | 547328 | 100.000 | 12043681 | 100.000 |

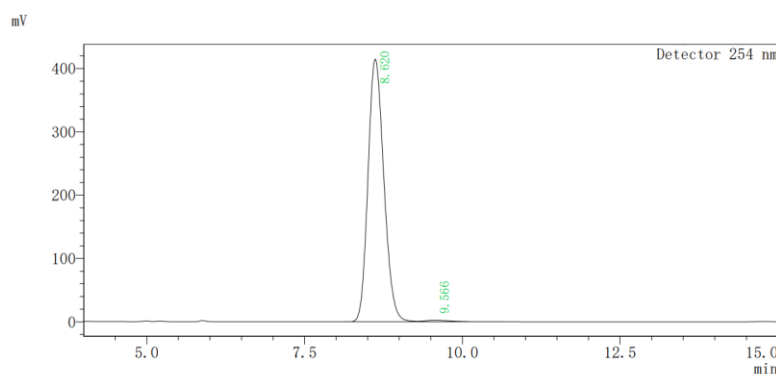

| No.   | Ret. Time (min) | Height | Height% | Area    | Area%   |
|-------|-----------------|--------|---------|---------|---------|
| 1     | 8.620           | 414869 | 99.443  | 7264090 | 99.075  |
| 2     | 9.566           | 2323   | 0.557   | 67835   | 0.925   |
| Total |                 | 417191 | 100.000 | 7331925 | 100.000 |

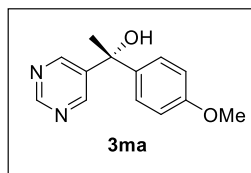

**(*R*)-1-(4-methoxyphenyl)-1-(pyrimidin-5-yl)ethan-1-ol**

**(3ma):** General Procedure A was followed using 1-(pyrimidin-5-yl)ethan-1-one (24.4 mg, 0.20 mmol), (4-methoxyphenyl)-boronic acid (91.2 mg, 0.60 mmol). After flash chromatography with petroleum ether/ethyl acetate (2/1 →

1/2, v/v), the desired product was obtained as a colorless solid (32.3 mg, 70% yield, >99% ee). Chiral HPLC conditions: chiralcel OD-H, 25 °C, flow rate: 1.0 mL/min, hexane/isopropanol/diethylamine: 80/20/0.03, 254 nm, 7.3 min (*R*), 8.9 min (*S*);  $[\alpha]_D^{25} = -10.6^\circ$  ( $c = 0.42$ ,  $\text{CHCl}_3$ );  $^1\text{H}$  NMR (400 MHz,  $\text{CHloroform-}d$ )  $\delta$  8.93 (s, 1H), 8.67 (s, 2H), 7.35 - 7.27 (m, 2H), 6.91 - 6.81 (m, 2H), 3.77 (s, 3H), 1.92 (s, 3H);  $^{13}\text{C}$  NMR (101 MHz,  $\text{CDCl}_3$ )  $\delta$  158.0, 156.4, 154.4, 141.7, 138.1, 127.0, 113.8, 73.0, 55.2, 30.4; IR (KBr,  $\text{cm}^{-1}$ ): 3330, 2963, 2932, 2838, 1613, 1563, 1511, 1430, 1409, 1252, 1098, 1029, 910, 821, 726; HRMS (ESI):  $m/z$  calcd. for  $[\text{M}+\text{H}, \text{C}_{13}\text{H}_{15}\text{N}_2\text{O}_2]^+$  : 231.1128; found: 231.1133.

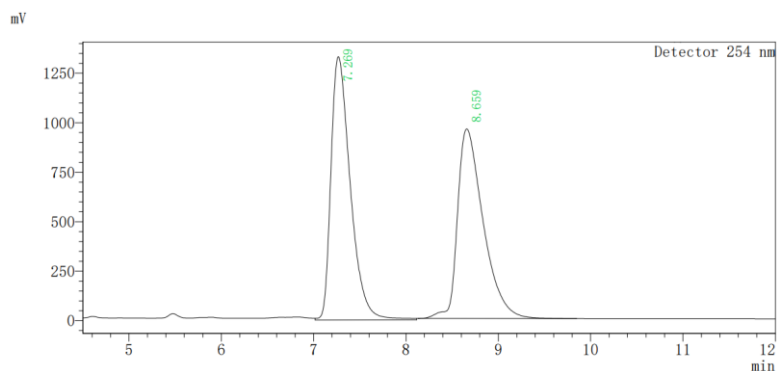

| No.   | Ret. Time (min) | Height  | Height% | Area     | Area%   |
|-------|-----------------|---------|---------|----------|---------|
| 1     | 7.269           | 1328876 | 58.117  | 19354666 | 51.070  |
| 2     | 8.659           | 957696  | 41.883  | 18543513 | 48.930  |
| Total |                 | 2286572 | 100.000 | 37898178 | 100.000 |

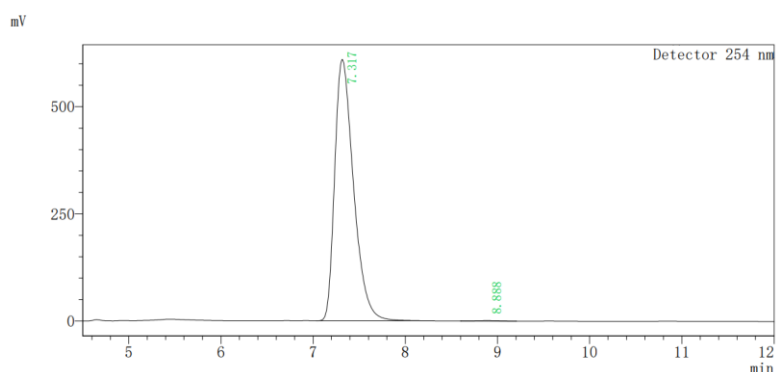

| No.   | Ret. Time (min) | Height | Height% | Area    | Area%   |
|-------|-----------------|--------|---------|---------|---------|
| 1     | 7.317           | 609751 | 99.834  | 8664852 | 99.815  |
| 2     | 8.888           | 1014   | 0.166   | 16071   | 0.185   |
| Total |                 | 610765 | 100.000 | 8680924 | 100.000 |

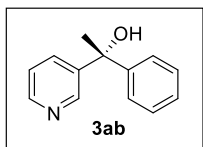

**(*R*)-1-phenyl-1-(pyridin-3-yl)ethan-1-ol (3ab):** General Procedure A was followed using 1-(pyridin-3-yl)ethan-1-one (24.2 mg, 0.20 mmol) and phenylboronic acid (73.2 mg, 0.60 mmol). After flash chromatography with petroleum ether/ethyl acetate (3/1 → 1/1, v/v), the desired product was obtained as a colorless solid (33.5 mg, 84% yield, >99% ee). The absolute configuration was determined by comparing its optical rotation with reported data<sup>[2]</sup>. Chiral HPLC conditions: chiralpak IC, 25 °C, flow rate: 1.0 mL/min, hexane/isopropanol/diethylamine: 70/30/0.03, 254 nm, 6.1 min (*R*), 10.5 min (*S*);  $[\alpha]^{25}_{\text{D}} = -22.5^{\circ}$  ( $c = 0.22$ ,  $\text{CHCl}_3$ );  $^1\text{H}$  NMR (400 MHz,  $\text{CHloroform-}d$ )  $\delta$  8.49 (d,  $J = 2.0$  Hz, 1H), 8.27 - 8.26 (m, 1H), 7.74 - 7.70 (m, 1H), 7.42 - 7.36 (m, 2H), 7.31 - 7.27 (2H), 7.26 - 7.20 (m, 1H), 7.17 - 7.14 (m, 1H), 4.48 (br.s, 1H), 1.91 (s, 3H);  $^{13}\text{C}$  NMR (101 MHz,  $\text{CDCl}_3$ )  $\delta$  147.4, 147.2, 147.1, 143.9, 133.9, 128.2, 127.1, 125.8, 123.0, 74.5, 30.5; HRMS (ESI):  $m/z$  calcd. for  $[\text{M}+\text{H}, \text{C}_{13}\text{H}_{14}\text{NO}]^+$ : 200.1070; found: 200.1074.

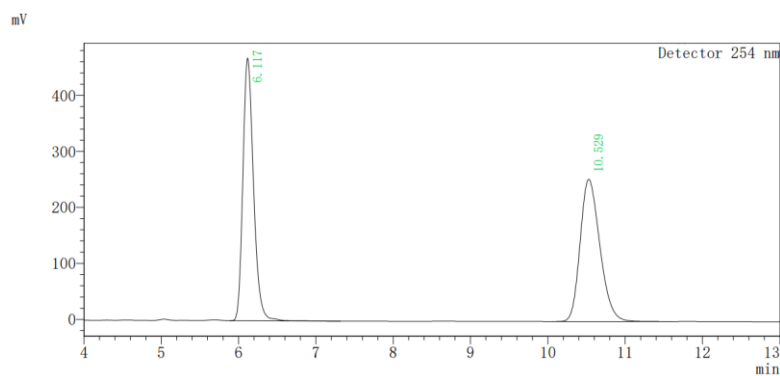

| No.   | Ret. Time (min) | Height | Height% | Area    | Area%   |
|-------|-----------------|--------|---------|---------|---------|
| 1     | 6.117           | 469529 | 64.912  | 4500892 | 50.041  |
| 2     | 10.529          | 253797 | 35.088  | 4493479 | 49.959  |
| Total |                 | 723326 | 100.000 | 8994371 | 100.000 |

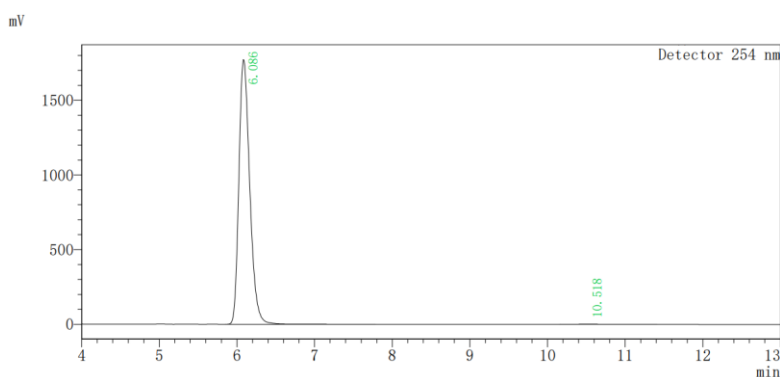

| No.   | Ret. Time (min) | Height  | Height% | Area     | Area%   |
|-------|-----------------|---------|---------|----------|---------|
| 1     | 6.086           | 1772959 | 99.898  | 17247330 | 99.813  |
| 2     | 10.518          | 1807    | 0.102   | 32365    | 0.187   |
| Total |                 | 1774766 | 100.000 | 17279695 | 100.000 |

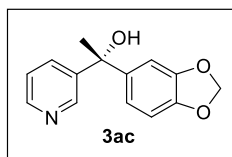

**(*R*)-1-(benzo[d][1,3]dioxol-5-yl)-1-(pyridin-3-yl)ethan-1-ol**

**(3ac):** General Procedure A was followed using 1-(pyridin-3-yl)-ethan-1-one (24.2 mg, 0.20 mmol) and benzo[d][1,3]dioxol-5-yl-boronic acid (99.6 mg, 0.60 mmol). After flash chromatography with petroleum ether/ethyl acetate (2/1 → 1/1, v/v), the desired

product was obtained as a colorless solid (38.1 mg, 78% yield, >99% ee). Chiral HPLC conditions: chiralpak AS-H, 25 °C, flow rate: 1.0 mL/min, hexane/isopropanol/diethylamine: 80/20/0.03, 254 nm, 11.5 min (*R*), 13.1 min (*S*);  $[\alpha]_D^{25} = -28.8^\circ$  ( $c = 0.44$ ,  $\text{CHCl}_3$ );  $^1\text{H}$  NMR (400 MHz,  $\text{CHloroform-}d$ )  $\delta$  8.45 (d,  $J = 1.9$  Hz, 1H), 8.25 (dd,  $J = 4.8, 1.6$  Hz, 1H), 7.71 (dt,  $J = 8.1, 2.0$  Hz, 1H), 7.16 - 7.13 (m, 1H), 6.89 - 6.79 (m, 2H), 6.70 - 6.68 (m, 1H), 5.88 (s, 2H), 4.14 (br.s, 1H), 1.85 (s, 3H);  $^{13}\text{C}$  NMR (101 MHz,  $\text{CDCl}_3$ )  $\delta$  147.5, 147.1, 146.9, 146.4, 144.1, 141.5, 133.8, 123.0, 118.9, 107.6, 106.9, 100.9, 74.2, 30.6; IR (KBr,  $\text{cm}^{-1}$ ): 3224, 2980, 2896, 1489, 1441, 1377, 1251, 1104, 1087, 1040, 932, 799, 716; HRMS (ESI):  $m/z$  calcd. for  $[\text{M}+\text{H}, \text{C}_{14}\text{H}_{14}\text{NO}_3]^+$ : 244.0968; found: 244.0971.

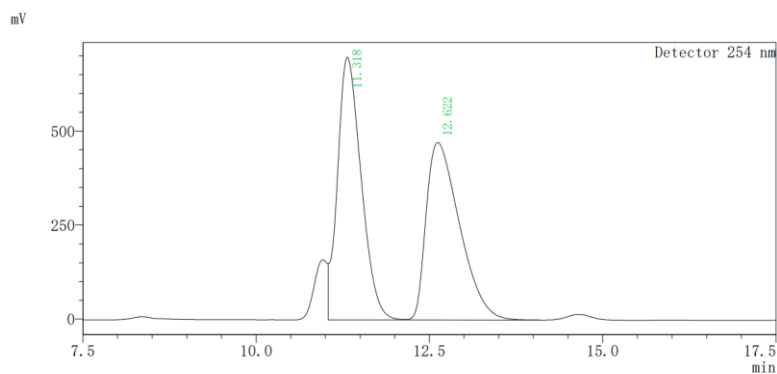

| No.   | Ret. Time (min) | Height  | Height% | Area     | Area%   |
|-------|-----------------|---------|---------|----------|---------|
| 1     | 11.318          | 698303  | 59.685  | 16508732 | 51.077  |
| 2     | 12.622          | 471682  | 40.315  | 15812633 | 48.923  |
| Total |                 | 1169984 | 100.000 | 32321365 | 100.000 |

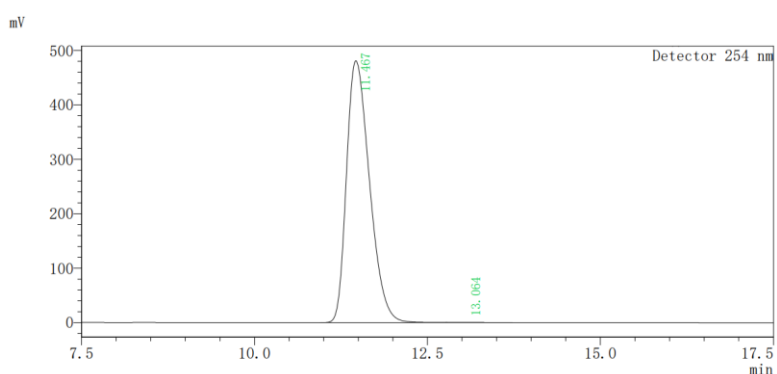

| No.   | Ret. Time (min) | Height | Height% | Area     | Area%   |
|-------|-----------------|--------|---------|----------|---------|
| 1     | 11.467          | 481033 | 99.909  | 11074387 | 99.864  |
| 2     | 13.064          | 440    | 0.091   | 15112    | 0.136   |
| Total |                 | 481473 | 100.000 | 11089499 | 100.000 |

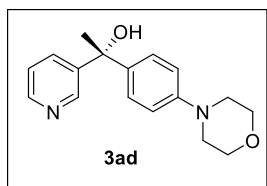

**(R)-1-(4-morpholinophenyl)-1-(pyridin-3-yl)ethan-1-ol**

**(3ad):** General Procedure A was followed using 1-(pyridin-3-yl)ethan-1-one (24.2 mg, 0.20 mmol) and (4-morpholinophenyl)boronic acid (124.2 mg, 0.60 mmol).

After flash chromatography with petroleum ether/ethyl acetate (3/1 → 1/1, v/v), the desired product was obtained as a colorless solid (42.4 mg, 74% yield, >99% ee). Chiral HPLC conditions: chiralpak AS-H, 25 °C, flow rate: 1.0 mL/min, hexane/isopropanol/diethylamine: 80/20/0.03, 254 nm, 15.1 min (*R*), 20.2 min (*S*);  $[\alpha]_D^{25} = -48.2^\circ$  ( $c=0.08$ ,  $\text{CHCl}_3$ );  $^1\text{H}$  NMR (400 MHz,  $\text{CHloroform-}d$ )  $\delta$  8.63 (d,  $J=2.3$  Hz, 1H), 8.45 - 8.44 (m, 1H), 7.72 (m, 1H), 7.36 - 7.27 (m, 2H), 7.23 - 7.19 (m, 1H), 6.95 - 6.77 (m, 2H), 3.84 (t,  $J=4.8$  Hz, 4H), 3.14 (t,  $J=5.2$  Hz, 4H), 2.53 (s, 1H), 1.94 (s, 3H);  $^{13}\text{C}$  NMR (101 MHz,  $\text{CDCl}_3$ )  $\delta$  150.1, 147.2, 147.0, 144.2, 138.5, 133.9, 126.8, 122.9, 115.1, 74.3, 66.7, 49.0, 30.1; IR (KBr,  $\text{cm}^{-1}$ ): 3193, 2964, 2919, 2849, 1610, 1514, 1450, 1369, 1261, 1229, 1123, 1086, 926, 830, 711; HRMS (ESI):  $m/z$  calcd. for  $[\text{M}+\text{H}, \text{C}_{17}\text{H}_{21}\text{N}_2\text{O}_2]^+$  : 285.1598; found: 285.1605.

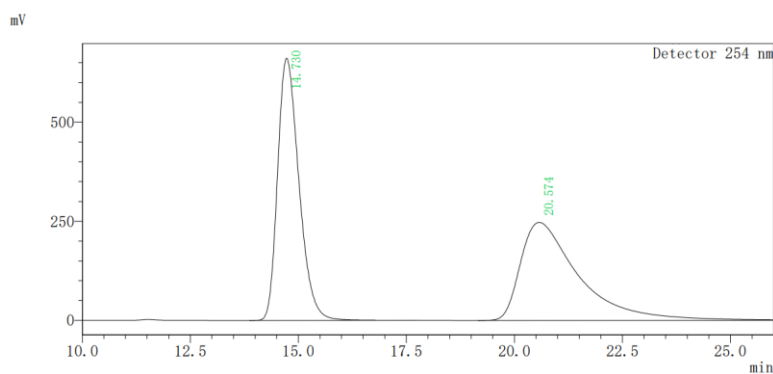

| No.   | Ret. Time (min) | Height | Height% | Area     | Area%   |
|-------|-----------------|--------|---------|----------|---------|
| 1     | 14.730          | 661286 | 72.779  | 22762686 | 49.506  |
| 2     | 20.574          | 247331 | 27.221  | 23216722 | 50.494  |
| Total |                 | 908617 | 100.000 | 45979408 | 100.000 |

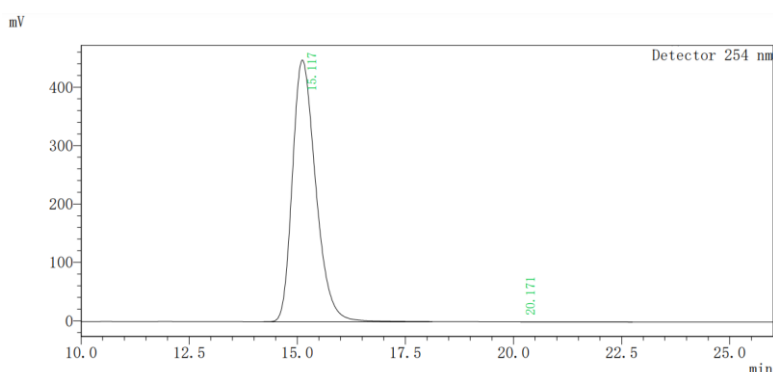

| No.   | Ret. Time (min) | Height | Height% | Area     | Area%   |
|-------|-----------------|--------|---------|----------|---------|
| 1     | 15.117          | 448331 | 99.979  | 16880404 | 99.950  |
| 2     | 20.171          | 92     | 0.021   | 8390     | 0.050   |
| Total |                 | 448423 | 100.000 | 16888794 | 100.000 |

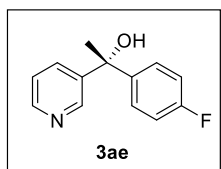

**(*R*)-1-(4-fluorophenyl)-1-(pyridin-3-yl)ethan-1-ol (3ae):**

General Procedure A was followed using 1-(pyridin-3-yl)ethan-1-one (24.2 mg, 0.20 mmol) and (4-fluorophenyl)boronic acid (84.0 mg, 0.60 mmol). After flash chromatography with petroleum ether/ethyl acetate (3/1 → 1/1, v/v), the desired product was obtained as a colorless oil (32.5 mg, 75% yield, >99% ee). Chiral HPLC conditions: chiralcel OD-H, 25 °C, flow rate: 1.0 mL/min, hexane/isopropanol /diethylamine: 90/10/0.03, 254 nm, 13.6 min (*S*), 15.2 min (*R*);  $[\alpha]_D^{25} = -9.0^\circ$  ( $c = 0.80$ ,  $\text{CHCl}_3$ );  $^1\text{H}$  NMR (400 MHz,  $\text{CHloroform-}d$ )  $\delta$  8.43 (s, 1H), 8.24 (d,  $J = 4.8$  Hz, 1H), 7.70 (dt,  $J = 8.0, 1.9$  Hz, 1H), 7.39 - 7.28 (m, 2H), 7.18 - 7.15 (m, 1H), 7.03 - 6.87 (m, 2H), 4.87 (br.s, 1H), 1.89 (s, 3H);  $^{13}\text{C}$  NMR (101 MHz,  $\text{CHloroform-}d$ )  $\delta$  163.0, 160.5, 147.2 (d,  $J = 40.3$  Hz), 143.9, 143.1 (d,  $J = 3.2$  Hz), 133.9, 127.6 (d,  $J = 8.0$  Hz), 123.1, 115.0 (d,  $J = 21.3$  Hz), 74.1, 30.7;  $^{19}\text{F}$  NMR (377 MHz,  $\text{CDCl}_3$ )  $\delta$  -115.2 (s, 1F); IR (KBr,  $\text{cm}^{-1}$ ): 3113, 2967, 2818, 1597, 1504, 1430, 1224, 1160, 1138, 1087, 1038, 924, 832, 711; HRMS (ESI):  $m/z$  calcd. for  $[\text{M}+\text{H}, \text{C}_{13}\text{H}_{13}\text{FNO}]^+$ : 218.0976; found: 218.0978.

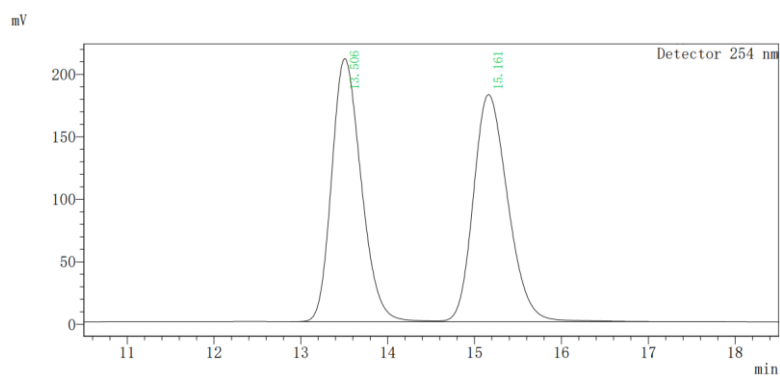

| No.   | Ret. Time (min) | Height | Height% | Area    | Area%   |
|-------|-----------------|--------|---------|---------|---------|
| 1     | 13.506          | 210499 | 53.662  | 4970200 | 49.764  |
| 2     | 15.161          | 181769 | 46.338  | 5017426 | 50.236  |
| Total |                 | 392268 | 100.000 | 9987626 | 100.000 |

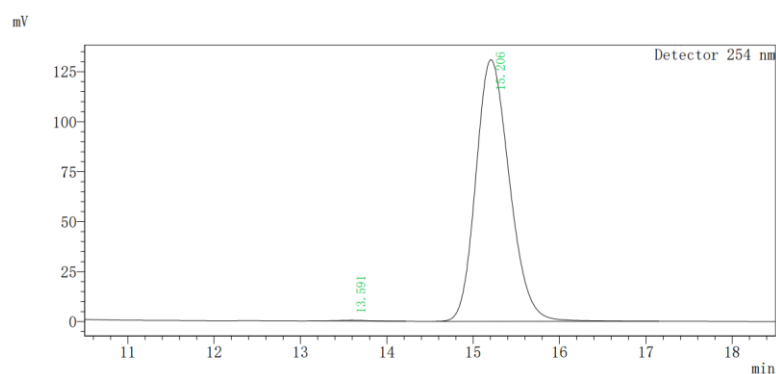

| No.   | Ret. Time (min) | Height | Height% | Area    | Area%   |
|-------|-----------------|--------|---------|---------|---------|
| 1     | 13.591          | 366    | 0.279   | 9618    | 0.271   |
| 2     | 15.206          | 130896 | 99.721  | 3541555 | 99.729  |
| Total |                 | 131262 | 100.000 | 3551174 | 100.000 |

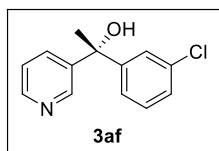

**(*R*)-1-(3-chlorophenyl)-1-(pyridin-3-yl)ethan-1-ol (3af):**

General Procedure A was followed using 1-(pyridin-3-yl)ethan-1-one (24.2 mg, 0.20 mmol) and (3-chlorophenyl)boronic acid (93.8 mg, 0.60 mmol). After flash chromatography with petroleum ether/ethyl acetate (3/1 → 2/1, v/v), the desired product was obtained as a colorless oil (27.7 mg, 59% yield, 99% ee). Chiral HPLC conditions: chiralpak AS-H, 25 °C, flow rate: 1.0 mL/min, hexane/isopropanol /diethylamine: 80/20/0.03, 254 nm, 7.3 min (*S*), 7.8 min (*R*);  $[\alpha]_D^{25} = -0.3^\circ$  ( $c = 0.30$ ,  $\text{CHCl}_3$ );  $^1\text{H}$  NMR (400 MHz,  $\text{CHloroform-}d$ )  $\delta$  8.44 (d,  $J = 2.3$  Hz, 1H), 8.26 (dd,  $J = 4.8, 1.6$  Hz, 1H), 7.73 - 7.70 m, 1H), 7.42 (m, 1H), 7.25 - 7.15 (m, 4H), 4.91 (br.s, 1H), 1.89 (s, 3H);  $^{13}\text{C}$  NMR (101 MHz,  $\text{CDCl}_3$ )  $\delta$  149.4, 147.5, 146.9, 143.4, 134.2, 134.1, 129.5, 127.2, 126.1, 124.0, 123.2, 74.1, 30.4; IR (KBr,  $\text{cm}^{-1}$ ): 3179, 2978, 2928, 2854, 1593, 1572, 1474, 1419, 1191, 1079, 1027, 925, 787, 699; HRMS (ESI):  $m/z$  calcd. for  $[\text{M}+\text{H}, \text{C}_{13}\text{H}_{13}\text{ClNO}]^+$ : 234.0680; found: 234.0689.

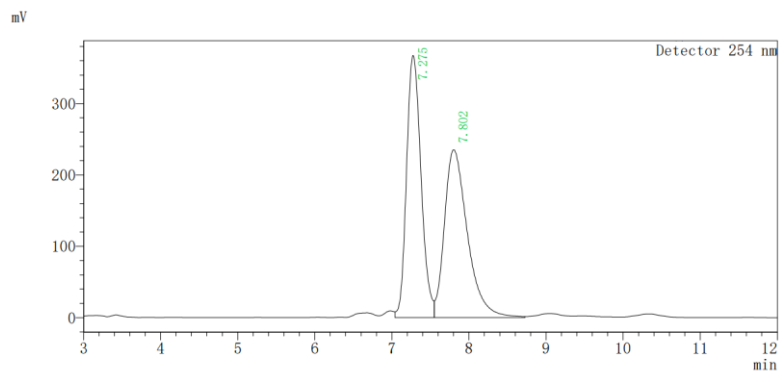

| No.   | Ret. Time (min) | Height | Height% | Area    | Area%   |
|-------|-----------------|--------|---------|---------|---------|
| 1     | 7.275           | 367442 | 60.956  | 4795656 | 49.583  |
| 2     | 7.802           | 235356 | 39.044  | 4876260 | 50.417  |
| Total |                 | 602798 | 100.000 | 9671916 | 100.000 |

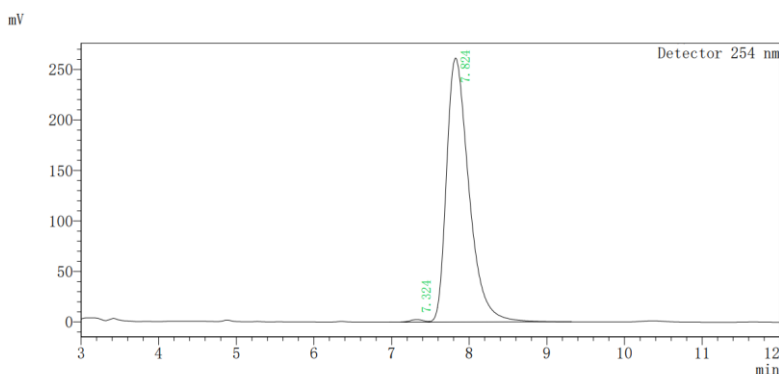

| No.   | Ret. Time (min) | Height | Height% | Area    | Area%   |
|-------|-----------------|--------|---------|---------|---------|
| 1     | 7.324           | 2615   | 0.990   | 33113   | 0.627   |
| 2     | 7.824           | 261396 | 99.010  | 5246068 | 99.373  |
| Total |                 | 264011 | 100.000 | 5279181 | 100.000 |

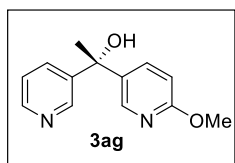

**(S)-1-(6-methoxypyridin-3-yl)-1-(pyridin-3-yl)ethan-1-ol**

**(3ag):** General Procedure A was followed using 1-(pyridin-3-yl)ethan-1-one (24.2 mg, 0.20 mmol) and (6-methoxypyridin-3-yl)-boronic acid (91.8 mg, 0.60 mmol). After flash chromatography with petroleum ether/ethyl acetate (3/1 → 1/2, v/v), the desired

product was obtained as a colorless solid (36.6 mg, 79% yield, >99% ee). Chiral HPLC conditions: chiralpak AS-H, 25 °C, flow rate: 1.0 mL/min, hexane/isopropanol/diethylamine: 90/10/0.03, 254 nm, 16.7 min (*S*), 18.4 min (*R*);  $[\alpha]_D^{25} = -6.3^\circ$  ( $c = 0.28$ ,  $\text{CHCl}_3$ );  $^1\text{H}$  NMR (400 MHz,  $\text{CHloroform-}d$ )  $\delta$  8.53 (d,  $J = 1.8$  Hz, 1H), 8.34 (dd,  $J = 4.8, 1.6$  Hz, 1H), 8.16 - 8.15 m, 1H), 7.73 - 7.70 m, 1H), 7.55 (dd,  $J = 8.7, 2.6$  Hz, 1H), 7.22 - 7.18 (m, 1H), 6.67 - 6.65 (m, 1H), 4.21 (br.s, 0.71H), 3.89 (s, 3H), 1.91 (s, 3H);  $^{13}\text{C}$  NMR (101 MHz,  $\text{CDCl}_3$ )  $\delta$  163.3, 147.7, 147.0, 144.0, 143.4, 137.2, 135.5, 133.9, 123.1, 110.6, 73.2, 53.5, 30.5; IR (KBr,  $\text{cm}^{-1}$ ): 3196, 2955, 2921, 1606, 1572, 1492, 1366, 1282, 1216, 1020, 919, 836, 709; HRMS (ESI):  $m/z$  calcd. for  $[\text{M}+\text{H}, \text{C}_{13}\text{H}_{15}\text{N}_2\text{O}_2]^+$ : 231.1128; found: 231.1133.

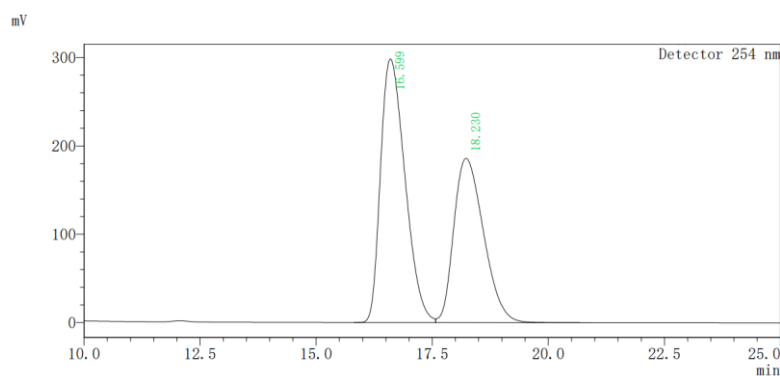

| No.   | Ret. Time (min) | Height | Height% | Area     | Area%   |
|-------|-----------------|--------|---------|----------|---------|
| 1     | 16.599          | 298203 | 61.605  | 10961607 | 56.902  |
| 2     | 18.230          | 185851 | 38.395  | 8302527  | 43.098  |
| Total |                 | 484054 | 100.000 | 19264134 | 100.000 |

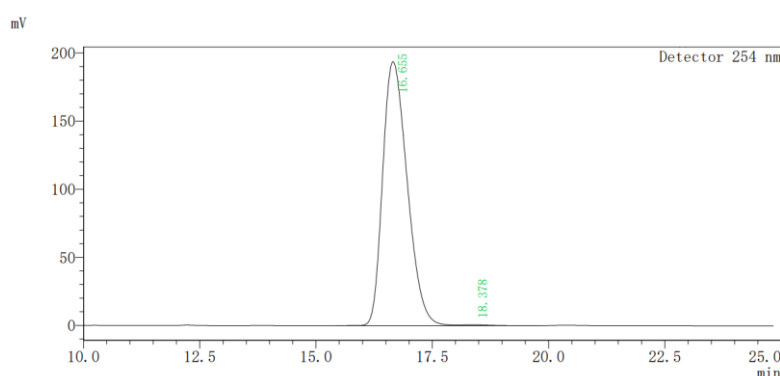

| No.   | Ret. Time (min) | Height | Height% | Area    | Area%   |
|-------|-----------------|--------|---------|---------|---------|
| 1     | 16.655          | 193728 | 99.697  | 7123939 | 99.627  |
| 2     | 18.378          | 588    | 0.303   | 26688   | 0.373   |
| Total |                 | 194316 | 100.000 | 7150626 | 100.000 |

#### 4. Synthesis of substrates for enantioselective Rh-catalyzed addition of arylboronic acids to $\alpha$ -Ketobenzoxazoles

$\alpha$ -Ketobenzoxazoles (except **4m**) were synthesized according to the followed scheme. Preparation of **4a** was shown as a representative example<sup>[3]</sup>.

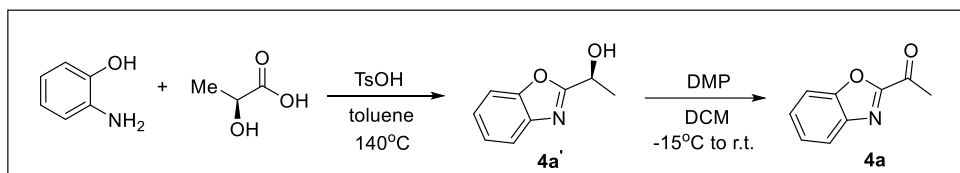

An oven-dried three-necked flask equipped with Dean-Stark apparatus was charged with 2-aminophenol (10.0 g, 91.66 mmol, 1.0 equiv) and TsOH (2.63 g, 13.75 mmol, 0.15 equiv), then fresh distilled toluene (160 mL) was added to the mixture. After stirring at room temperature for 5 minutes, the flask was moved to an oil bath, (*S*)-2-hydroxypropanoic acid (8.67 g, 96.24 mmol, 1.05 equiv) was added. The toluene collected in Dean-Stark apparatus was removed for 2 times at beginning of the reaction. The reaction was stirred at 140 °C overnight, then the three-necked flask was removed from the bath oil and allowed to cool to room temperature. reaction mixture was concentrated in vacuo then was diluted with DCM (40 mL) and filtered through celite, rinsing the celite plug with DCM (200 mL). The combined organic phase was added water (120 mL), the two phases were separated and the water phase was extracted with DCM (100 mL) for 2 times. subsequently, the combined organic phase was dried with anhydrous sodium sulfate, filtered, and concentrated in vacuo. The crude product was purified by flash chromatography on a silica gel column with PE and EA (6/1, v/v) as the eluent to afford the alcohol product **4a'**.

Alcohol **4a'** (5.82 g, 35.65 mmol, 1 equiv) was dissolved in DCM (150 mL), Dess-Martin Periodinane (18.20 g, 42.8 mmol, 1.2 equiv) was added in portions to above mixture at -15°C. The reaction was stirred for about 2 hours, TLC showed the transformation was completed, and reaction was quenched by adding saturated NaHCO<sub>3</sub> aqueous (20-40 mL) and saturated Na<sub>2</sub>SO<sub>3</sub> aqueous (20-40 mL) at 0 °C. The mixture was separated, and the water phase was extracted with DCM (80 mL x 2) and the combined organic extracts were washed with brine (100 mL), dried with anhydrous sodium sulfate, filtered, and concentrated in vacuo. The crude products were purified by flash chromatography on a silica gel column with PE and EA (12/1, v/v) as the eluent to afford the desired product **4a**.

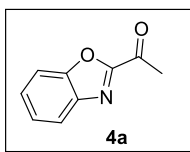

**1-(benzo[d]oxazol-2-yl)ethan-1-one (4a):** Aforementioned procedure was followed using 2-aminophenol (10.00 g, 91.66 mmol), (*S*)-2-hydroxypropanoic acid (8.67 g, 96.24 mmol), and TsOH (2.63 g, 13.75 mmol). **4a'** was obtained as an orange oil (6.98 g, 47% yield) by flash chromatography on silica gel with petroleum ether/ethyl acetate (6/1, v/v). Then, using **4a'** (5.82 g, 35.65 mmol) and DMP (18.20 g, 42.8 mmol), the **4a** was obtained as a white solid (4.94 g, 86% yield) by flash chromatography with petroleum ether/ethyl acetate (12/1, v/v). <sup>1</sup>H NMR (400 MHz, Chloroform-*d*) δ 7.91 - 7.89 (m, 1H), 7.67 - 7.65 (m, 1H), 7.56 - 7.52 (m, 1H), 7.48 - 7.44 (m, 1H), 2.82 (s, 3H). <sup>13</sup>C NMR (101 MHz, CDCl<sub>3</sub>) δ 187.4, 157.3, 150.8, 140.5, 128.5, 125.7, 122.2, 111.9, 26.9; HRMS (ESI): *m/z* calcd. for [M+Na, C<sub>9</sub>H<sub>7</sub>NNaO<sub>2</sub>]<sup>+</sup> : 184.0369; found: 184.0374.

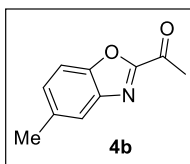

**1-(5-methylbenzo[d]oxazol-2-yl)ethan-1-one (4b):**

Aforementioned procedure was followed using 2-amino-4-methylphenol (3.00 g, 24.36 mmol), (*S*)-2-hydroxypropanoic acid (2.30 g, 25.58 mmol), and TsOH (695.0 mg, 3.65 mmol). **4b'** was obtained as an orange oil (2.20 g, 51% yield) by flash chromatography on silica gel with petroleum ether/ethyl acetate (8/1 → 4/1, v/v). Then, using **4b'** (1.0 g, 5.65 mmol) and DMP (2.88 g, 6.78 mmol), the **4b** was obtained as a white solid (902.1 mg, 91% yield) by flash chromatography with petroleum ether/ethyl acetate (12/1, v/v). <sup>1</sup>H NMR (400 MHz, Chloroform-*d*) δ 7.67 - 7.66 (m, 1H), 7.53 - 7.51 (m, 1H), 7.36 - 7.33 (m, 1H), 2.80 (s, 3H), 2.51 (s, 3H). <sup>13</sup>C NMR (101 MHz, CDCl<sub>3</sub>) δ 187.4, 157.4, 149.0, 140.7, 135.8, 130.0, 121.7, 111.2, 26.9, 21.4; HRMS (ESI): *m/z* calcd. for [M+Na, C<sub>10</sub>H<sub>9</sub>NNaO<sub>2</sub>]<sup>+</sup> : 198.0525; found: 198.0523.

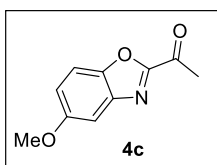

**1-(5-methoxybenzo[d]oxazol-2-yl)ethan-1-one (4c):**

Aforementioned procedure was followed using 2-amino-4-methoxyphenol (5.00 g, 35.96 mmol) and (*S*)-2-hydroxypropanoic acid (3.40 g, 37.75 mmol) and TsOH (1025.94 mg, 5.40 mmol). **4c'** was obtained as an orange oil (2.92 g, 42% yield) by flash chromatography on silica gel with petroleum ether/ethyl acetate (8/1 → 4/1, v/v). Then, using **4c'** (1.17 g, 6.06 mmol) and DMP (3.08 g, 7.27 mmol), the **4c** was obtained as a white solid (952.9 mg, 92% yield) by flash chromatography with petroleum ether/ethyl acetate (12/1, v/v). <sup>1</sup>H NMR (400 MHz, Chloroform-*d*) δ 7.54 - 7.52 (m, 1H), 7.31 - 7.30 (m, 1H), 7.16 - 7.13 (dd, *J* = 9.1, 2.6 Hz, 1H), 3.88 (s, 3H), 2.79 (s, 3H); <sup>13</sup>C NMR (101 MHz, CDCl<sub>3</sub>) δ 187.3, 158.2, 158.0, 145.5, 141.4, 118.6, 112.2, 103.5, 55.9, 26.9; IR (KBr, cm<sup>-1</sup>): 3075, 3029, 2917, 1707, 1529, 1350, 1123, 832; HRMS (ESI): *m/z* calcd. for [M+H, C<sub>10</sub>H<sub>10</sub>NO<sub>3</sub>]<sup>+</sup> : 192.0655; found: 192.0655.

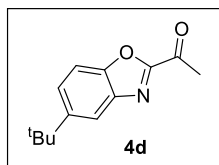

**1-(5-(tert-butyl)benzo[d]oxazol-2-yl)ethan-1-one (4d):**

Aforementioned procedure was followed using 2-amino-4-(tert-butyl)phenol (4.15 g, 25.00 mmol), (*S*)-2-hydroxypropanoic acid (2.38 g, 26.42 mmol) and TsOH (713.3 mg, 3.75 mmol). **4d'** was obtained as an orange oil (3.63 g, 66% yield) by flash chromatography on silica gel with petroleum ether/ethyl acetate (8/1 → 4/1, v/v). Then, using **4d'** (3.62 g, 16.51 mmol) and DMP (8.40 g, 19.81 mmol), the **4d** was obtained as a white solid (3.08 g, 84% yield) by flash chromatography with petroleum ether/ethyl acetate (12/1, v/v). <sup>1</sup>H NMR (400 MHz, CDCl<sub>3</sub>) δ 7.91 - 7.87 (m, 1H), 7.62 - 7.60 (m, 1H), 7.57 - 7.55 (m, 1H), 2.80 (s, 3H), 1.40 (s, 9H). <sup>13</sup>C NMR (101 MHz, CDCl<sub>3</sub>) δ 187.4, 157.5, 149.5, 148.9, 140.5, 126.8, 118.3, 111.0, 35.0, 31.6, 26.9; IR (KBr, cm<sup>-1</sup>): 3078, 2962, 2869, 1707, 1529, 1475, 1106, 831; HRMS (ESI): *m/z* calcd. for [M+Na, C<sub>13</sub>H<sub>15</sub>NNaO<sub>2</sub>]<sup>+</sup> : 240.0995; found: 240.1001.

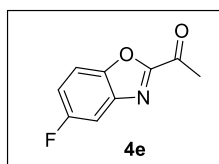

**1-(5-fluorobenzo[d]oxazol-2-yl)ethan-1-one (4e):**

Aforementioned procedure was followed using 2-amino-4-fluorophenol (3.00 g, 23.61 mmol), (*S*)-2-hydroxypropanoic acid (2.23 g, 24.80 mmol) and TsOH (673.2 mg, 3.54 mmol). **4e'** was obtained as an orange oil (1.20 g, 28% yield) by flash chromatography on silica gel with petroleum ether/ethyl acetate (8/1 → 4/1, v/v). Then, using **4e'** (1.20 g, 6.64 mmol) and DMP (3.38 g, 7.97 mmol), the **4e** was obtained as a pink solid (1019.8 mg, 86% yield) by flash chromatography with petroleum ether/ethyl acetate (12/1, v/v). <sup>1</sup>H NMR (400 MHz, CDCl<sub>3</sub>) δ 7.63 - 7.60 (m, 1H), 7.56 (dd, *J* = 8.0, 2.5 Hz, 1H), 7.33 - 7.26 (m, 1H), 2.81 (s, 3H); <sup>13</sup>C NMR (101 MHz, CDCl<sub>3</sub>) δ 187.1, 160.5 (d, *J* = 243.4 Hz), 158.6, 147.1 (d, *J* = 10.0 Hz), 141.2 (d, *J* = 13.2 Hz), 116.9 (d, *J* = 26.8 Hz), 112.5 (d, *J* = 9.9 Hz), 108.1 (d, *J* = 25.3 Hz), 26.9; <sup>19</sup>F NMR (377 MHz, CDCl<sub>3</sub>) δ -115.1 (s, 1F); IR (KBr, cm<sup>-1</sup>): 3097, 3067, 3027, 1707, 1533, 1475, 1124, 825; HRMS (ESI): *m/z* calcd. for [M+Na, C<sub>9</sub>H<sub>6</sub>FNNaO<sub>2</sub>]<sup>+</sup> : 202.0275; found: 202.0270.

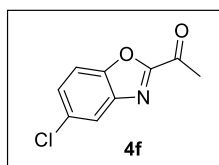

**1-(5-chlorobenzo[d]oxazol-2-yl)ethan-1-one (4f):**

Aforementioned procedure was followed using 2-amino-4-chlorophenol (5.74 g, 40.00 mmol), (*S*)-2-hydroxypropanoic acid (3.78 g, 42.00 mmol) and TsOH (1.14 g, 6.00 mmol). **4f'** was obtained as an orange oil (1.96 g, 25% yield) by flash chromatography on silica gel with petroleum ether/ethyl acetate (8/1 → 4/1, v/v). Then, using **4f'** (1.5 g, 7.61 mmol) and DMP (3.87 g, 9.13 mmol), the **4f** was obtained as a colorless solid (1.16 g, 78% yield) by flash chromatography with petroleum ether/ethyl acetate (12/1, v/v). <sup>1</sup>H NMR (400 MHz, CDCl<sub>3</sub>) δ 7.88 (m, 1H), 7.60 - 7.58 (m, 1H), 7.52 - 7.49 (m, 1H), 2.81 (s, 3H); <sup>13</sup>C NMR (101 MHz, CDCl<sub>3</sub>) δ 187.1, 158.1, 149.3, 141.5, 131.3, 129.0, 122.0, 112.7, 27.0; HRMS (ESI): *m/z* calcd. for [M+Na, C<sub>9</sub>H<sub>6</sub>ClNNaO<sub>2</sub>]<sup>+</sup> : 217.9979; found: 217.9976.

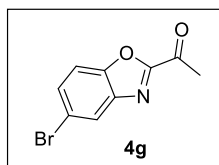

**1-(5-bromobenzo[d]oxazol-2-yl)ethan-1-one (4g):**

Aforementioned procedure was followed using 2-amino-4-bromophenol (2.93 g, 15.58 mmol), (*S*)-2-hydroxypropanoic acid (1.47 g, 16.36 mmol) and TsOH (444.5 mg, 2.34 mmol). **4g'** was obtained as an orange oil (1.15 g, 31% yield) by flash chromatography on silica gel with petroleum ether/ethyl acetate (8/1 → 4/1, v/v). Then, using **4g'** (1.15 g, 4.77 mmol) and DMP (2.42 g, 5.73 mmol), the **4g** was obtained as a pink solid (869.8 mg, 76% yield) by flash chromatography with petroleum ether/ethyl acetate (12/1, v/v). <sup>1</sup>H NMR (400 MHz, CDCl<sub>3</sub>) δ 8.04 (d, *J* = 1.6 Hz, 1H), 7.66 - 7.63 m, 1H), 7.56 - 7.53 (m, 1H), 2.81 (s, 3H); <sup>13</sup>C NMR (101 MHz, CDCl<sub>3</sub>) δ 187.1, 158.0, 149.7, 142.0, 131.7, 125.1, 118.5, 113.2, 27.0; HRMS (ESI): *m/z* calcd. for [M+Na, C<sub>9</sub>H<sub>6</sub>BrNNaO<sub>2</sub>]<sup>+</sup>: 261.9474; found: 261.9479.

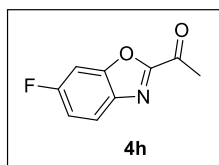

**1-(6-fluorobenzo[d]oxazol-2-yl)ethan-1-one (4h):**

Aforementioned procedure was followed using 2-amino-5-fluorophenol (2.5 g, 19.67 mmol), (*S*)-2-hydroxypropanoic acid (1.86 g, 20.64 mmol) and TsOH (561.2 mg, 2.55 mmol). **4h'** was obtained as an orange oil (594 mg, 17% yield) by flash chromatography on silica gel with petroleum ether/ethyl acetate (8/1 → 4/1, v/v). Then, using **4h'** (500 mg, 2.76 mmol) and DMP (1.40 g, 3.31 mmol), the **4h** was obtained as a colorless solid (408.2 mg, 83% yield) by flash chromatography with petroleum ether/ethyl acetate (12/1, v/v). <sup>1</sup>H NMR (400 MHz, CDCl<sub>3</sub>) δ 7.85 (dd, *J* = 8.9, 4.9 Hz, 1H), 7.36 (dd, *J* = 7.7, 2.4 Hz, 1H), 7.22 (td, *J* = 9.2, 2.4 Hz, 1H), 2.79 (s, 3H); <sup>13</sup>C NMR (101 MHz, CDCl<sub>3</sub>) δ 186.8, 162.6 (d, *J* = 249.4 Hz), 157.95 (d, *J* = 4.0 Hz), 150.92 (d, *J* = 15.0 Hz), 136.82 (d, *J* = 1.7 Hz), 123.0 (d, *J* = 10.5 Hz), 114.5 (d, *J* = 25.3 Hz), 99.5 (d, *J* = 28.1 Hz), 26.8; <sup>19</sup>F NMR (377 MHz, CDCl<sub>3</sub>) δ -108.9 (s, 1F); HRMS (ESI): *m/z* calcd. for [M+H, C<sub>9</sub>H<sub>7</sub>FNO<sub>2</sub>]<sup>+</sup>: 180.0455; found: 180.0451.

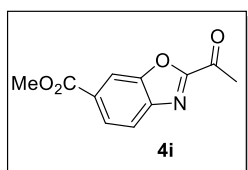

**methyl 2-acetylbenzo[d]oxazole-6-carboxylate (4i):**

Aforementioned procedure was followed using 4-amino-3-hydroxybenzoate (2.5 g, 14.96 mmol), (*S*)-2-hydroxypropanoic acid (1.59 g, 15.71 mmol) and TsOH (426.8 mg, 2.24 mmol). **4i'** was obtained as an orange oil (731.3 mg, 22% yield) by flash chromatography on silica gel with petroleum ether/ethyl acetate (8/1 → 4/1, v/v). Then, using **4i'** (731.3 mg, 3.31 mmol) and DMP (1.68 g, 3.97 mmol), the **4i** was obtained as a colorless solid (627.2 mg, 87% yield) by flash chromatography with petroleum ether/ethyl acetate (12/1, v/v). <sup>1</sup>H NMR (400 MHz, CDCl<sub>3</sub>) δ 8.34 (m, 1H), 8.20 - 8.17 (m, 1H), 7.95 - 7.93 (m, 1H), 3.99 (s, 3H), 2.84 (s, 3H); <sup>13</sup>C NMR (101 MHz, CDCl<sub>3</sub>) δ 187.2, 165.9, 159.0, 150.4, 144.0, 130.4, 127.1, 122.0, 113.7, 52.6, 27.1; IR (KBr, cm<sup>-1</sup>): 3106, 3010, 1704, 1425, 1290, 1122, 890, 774; HRMS (ESI): *m/z* calcd. for [M+Na, C<sub>11</sub>H<sub>9</sub>NNaO<sub>4</sub>]<sup>+</sup>: 242.0424; found: 242.0426.

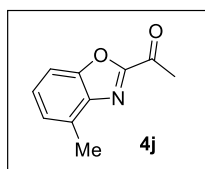

**1-(4-methylbenzo[d]oxazol-2-yl)ethan-1-one (4j):**

Aforementioned procedure was followed using 2-amino-3-methylphenol (2.50 g, 20.30 mmol), (*S*)-2-hydroxypropanoic acid (1.92 g, 21.32 mmol) and TsOH (965.0 mg, 5.08 mmol). **4j'** was obtained as an orange oil (1.25 g, 35% yield) by flash chromatography on silica gel with petroleum ether/ethyl acetate (8/1 → 4/1, v/v). Then, using **4j'** (1.0 g, 5.65 mmol) and DMP (2.87 g, 6.78 mmol), the **4j** was obtained as a colorless solid (884.2 mg, 89% yield) by flash chromatography with petroleum ether/ethyl acetate (12/1, v/v). <sup>1</sup>H NMR (400 MHz, CDCl<sub>3</sub>) δ 7.47 - 7.39 (m, 2H), 7.25 - 7.23 (m, 1H), 2.82 (s, 3H), 2.68 (s, 3H); <sup>13</sup>C NMR (101 MHz, CDCl<sub>3</sub>) δ 187.7, 156.7, 150.6, 140.1, 133.2, 128.3, 125.9, 109.0, 27.0, 16.4; IR (KBr, cm<sup>-1</sup>): 3087, 2922, 1702, 1532, 1305, 1112, 789; HRMS (ESI): *m/z* calcd. for [M+Na, C<sub>10</sub>H<sub>9</sub>NNaO<sub>2</sub>]<sup>+</sup> : 198.0525; found: 198.0532.

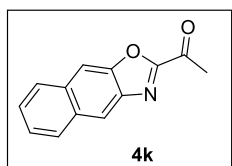

**1-(naphtho[2,3-d]oxazol-2-yl)ethan-1-one (4k):** solid,

Aforementioned procedure was followed using 3-aminonaphthalen-2-ol (2.00 g, 12.56 mmol), (*S*)-2-hydroxypropanoic acid (1.19 g, 13.19 mmol) and TsOH (597.0 mg, 3.14 mmol). **4k'** was obtained as an orange oil (523.7 mg, 20% yield) by flash chromatography on silica gel with petroleum ether/ethyl acetate (8/1 → 4/1, v/v). Then, using **4k'** (523.7 g, 2.46 mmol) and DMP (1.25 g, 2.95 mmol), the **4k** was obtained as a yellow solid (308.2 mg, 59% yield) by flash chromatography with petroleum ether/ethyl acetate (12/1, v/v). <sup>1</sup>H NMR (400 MHz, CDCl<sub>3</sub>) δ 8.40 (s, 1H), 8.06 - 8.05 (m, 2H), 8.00 (d, *J* = 8.1 Hz, 1H), 7.65 - 7.47 (m, 2H), 2.87 (s, 3H); <sup>13</sup>C NMR (101 MHz, CDCl<sub>3</sub>) δ 187.8, 158.7, 149.0, 140.0, 133.4, 131.7, 128.8, 128.0, 126.7, 125.2, 120.6, 107.8, 27.1; IR (KBr, cm<sup>-1</sup>): 3061, 1706, 1537, 1305, 1265, 870, 753; HRMS (ESI): *m/z* calcd. for [M+Na, C<sub>13</sub>H<sub>9</sub>NNaO<sub>2</sub>]<sup>+</sup> : 234.0525; found: 234.0533.

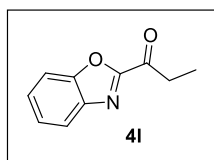

**1-(benzo[d]oxazol-2-yl)propan-1-one (4l):**

Aforementioned procedure was followed using 2-aminophenol (2.99 g, 27.44 mmol), (*S*)-2-hydroxybutanoic acid (3.00 g, 28.82 mmol) and TsOH (782.9 mg, 4.12 mmol). **4l'** was obtained as an orange oil (1.74 g, 36% yield) by flash chromatography on silica gel with petroleum ether/ethyl acetate (8/1 → 4/1, v/v). Then, using **4l'** (1.73 g, 9.75 mmol) and DMP (4.96 g, 11.70 mmol), the **4l** was obtained as a white solid (1.46 g, 85% yield) by flash chromatography with petroleum ether/ethyl acetate (12/1, v/v). <sup>1</sup>H NMR (400 MHz, CDCl<sub>3</sub>) δ 7.90 - 7.88 (m, 1H), 7.67 - 7.65 (m, 1H), 7.56 - 7.52 (m, 1H), 7.48 - 7.44 (m, 1H), 3.26 (q, *J* = 7.3 Hz, 2H), 1.30 (t, *J* = 7.3 Hz, 3H); <sup>13</sup>C NMR (101 MHz, CDCl<sub>3</sub>) δ 190.7, 157.1, 150.6, 140.4, 128.4, 125.6, 122.2, 111.9, 32.9, 7.7; HRMS (ESI): *m/z* calcd. for [M+Na, C<sub>10</sub>H<sub>9</sub>NNaO<sub>2</sub>]<sup>+</sup> : 198.0525; found: 198.0529.

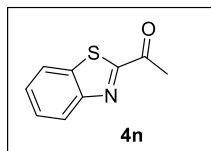

**1-(benzo[d]thiazol-2-yl)ethan-1-one (4n):** Aforementioned procedure was followed using 2-aminobenzenethiol (5 g, 39.94 mmol), (*S*)-2-hydroxypropanoic acid (3.78 g, 41.94 mmol) and TsOH (1.14 g, 5.99 mmol). **4n'** was obtained as an orange oil (2.51 g, 35% yield) by flash chromatography on silica gel with petroleum ether/ethyl acetate (8/1 → 4/1, v/v). Then, using **4n'** (1.00 g, 5.58 mmol) and DMP (2.84 g, 6.69 mmol), the **4n** was obtained as a colorless solid (863.3 mg, 87% yield) by flash chromatography with petroleum ether/ethyl acetate (12/1, v/v). <sup>1</sup>H NMR (400 MHz, CDCl<sub>3</sub>) δ 8.32 - 8.11 (m, 1H), 8.11 - 7.87 (m, 1H), 7.61 - 7.56 (m, 1H), 7.56 - 7.50 (m, 1H), 2.83 (s, 3H); <sup>13</sup>C NMR (101 MHz, CDCl<sub>3</sub>) δ 193.0, 166.4, 153.5, 137.3, 127.6, 126.9, 125.4, 122.4, 26.1; HRMS (ESI): *m/z* calcd. for [M+Na, C<sub>9</sub>H<sub>7</sub>NNaOS]<sup>+</sup> : 200.0141; found: 200.0139.

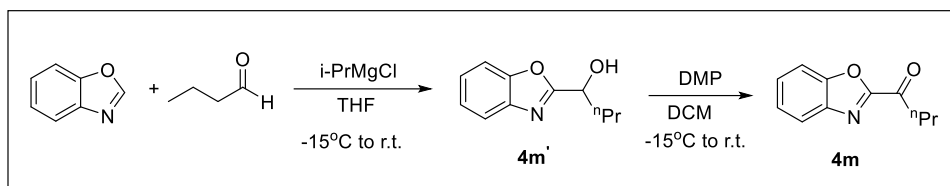

Compound **4m'** was synthesized according the reference [4]. Benzo[d]oxazole (1.0 g, 8.39 mmol, 1 equiv) was dissolved in anhydrous THF (7 mL) under N<sub>2</sub>, and the solution was cooled to -15 °C, *i*-PrMgCl (2M solution in THF, 4.2 mL, 8.39 mmol, 1 equiv) was added dropwise via syringe to the cooled mixture, and the mixture was stirred at -15 °C for about 30 minutes. After this time, butyraldehyde (603.5 mg, 8.39 mmol, 1 equiv) in 10 mL anhydrous THF (prepared in a separate, flame-dried round bottom flask under nitrogen) was added to the cooled mixture dropwise via constant pressure funnel and the mixture was stirred at -15 °C for about 20 minutes. After this time, the mixture was stirred and allowed to warm up to room temperature for about 3 h, TLC monitored the process of reaction. The reaction was quenched by adding saturated NH<sub>4</sub>Cl (10-15 mL) at 0 °C. The organic layer was separated, water layer was extracted with EtOAc (20 mL x 2), and the combined organic extracts were washed with brine (30 mL), dried with anhydrous sodium sulfate, filtered, and concentrated in vacuo. The crude products were purified by flash chromatography on a silica gel column with PE/EA (8/1 → 4/1, v/v) as the eluent to afford the desired product **4m'** (545 mg, 34% yield, the reaction yield was not optimized). Following the aforementioned oxidation reaction procedure, **4m'** (545 mg, 2.85 mmol) and DMP (1.45 g, 3.42 mmol, 1.2 equiv) was used to provide **4m** as a white solid (404mg, 75% yield) after flash chromatography on a silica gel column with PE/EA (15/1, v/v).

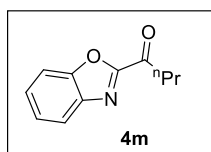

**1-(benzo[d]oxazol-2-yl)butan-1-one (4m):** <sup>1</sup>H NMR (400 MHz, CDCl<sub>3</sub>) δ 7.90 - 7.88 (m, 1H), 7.67 - 7.65 (m, 1H), 7.55 - 7.51 (m, 1H), 7.50 - 7.40 (m, 1H), 3.29 - 3.14 (m, 2H), 1.96 - 1.78 (m, 2H), 1.05 (t, *J* = 7.4 Hz, 3H); <sup>13</sup>C NMR (101 MHz, CDCl<sub>3</sub>) δ 190.1, 157.2, 150.6, 140.4, 128.3, 125.6, 122.1, 111.8, 41.3, 17.31 13.6;

IR (KBr,  $\text{cm}^{-1}$ ): 3092, 3023, 2959, 2875, 1706, 1532, 1350, 1023, 751; HRMS (ESI):  $m/z$  calcd. for  $[\text{M}+\text{H}, \text{C}_{11}\text{H}_{12}\text{NO}_2]^+$  : 190.0863; found: 190.0862.

## 5. General procedure of enantioselective Rh-catalyzed addition of arylboronic acids to $\alpha$ -Ketobenzoxazoles (General Procedure B).

To a flame-dried Schlenk tube equipped with a magnetic stirring bar was charged  $\alpha$ -ketobenzoxazoles (0.20 mmol, 1 equiv), arylboronic acids (0.50 mmol, 2.5 equiv), CsF (0.40 mmol, 2 equiv), (*S,S,S,S*)-WingPhos (5.3 mg, 0.0072 mmol, 3.6 mol %) and  $[\text{Rh}(\text{C}_2\text{H}_4)_2\text{Cl}]_2$  (1.2 mg, 0.0030 mmol, 1.5 mol %). The tube was sealed then evacuated and backfilled with  $\text{N}_2$  for three times. Fresh distilled toluene (3.5 mL) was added via syringe and the resulting mixture was stirred at 60 °C under nitrogen for 12 h. After this time, the Schlenk tube was removed from the bath and allowed to cool to room temperature. The heterogenous mixture was diluted with EtOAc (10 mL) and filtered through celite, rinsing the celite plug with EtOAc (25 mL). The filtrate was concentrated, and the resulting residue was purified via flash chromatography on silica gel with petroleum ether/ethyl acetate (8/1, v/v), affording the desired alcohol products. The enantiomeric excesses were determined by chiral HPLC on a chiralcel OD-H, chiralcel AD-H or chiralpak IA column.

**To perform the addition reaction by employing 0.3 mol% Rhodium**, the procedure is: to a flame-dried Schlenk tube equipped with a magnetic stirring bar was charged  $\alpha$ -ketobenzoxazoles (2.0 mmol, 1 equiv), arylboronic acids (6.0 mmol, 3.0 equiv), CsF (4.0 mmol, 2 equiv), (*S,S,S,S*)-WingPhos (5.3 mg, 0.0072 mmol, 0.36 mol %) and  $[\text{Rh}(\text{C}_2\text{H}_4)_2\text{Cl}]_2$  (1.2 mg, 0.0030 mmol, 0.15 mol %) The tube was sealed then evacuated and backfilled with  $\text{N}_2$  for three times. Fresh distilled toluene (35 mL) was added via syringe and the resulting mixture was stirred at 70 °C under nitrogen for 16 h. Then the reaction mixture was cooled to room temperature, quenched by addition of EtOAc (30 mL) and water (20 mL). The organic phase was separated, the water phase was extracted with EtOAc (20 mL x 3), then combined the extracts, dried over sodium sulfate, concentrated and purified by flash column chromatography to provide the desired alcohol product. The enantiomeric excesses were determined by chiral HPLC on a chiralcel OD-H, or chiralcel AD-H.

## 6. Analytical data of the products of enantioselective Rh-catalyzed addition of arylboronic acids to $\alpha$ -Ketobenzoxazoles.

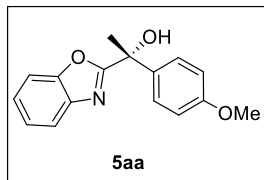

**(R)-1-(benzo[d]oxazol-2-yl)-1-(4-methoxyphenyl)ethan-1-ol (5aa):** General Procedure B was followed using **4a** (32.2 mg, 0.20 mmol) and (4-methoxyphenyl)boronic acid (76.0 mg, 0.50 mmol). After flash chromatography with petroleum ether/ethyl acetate (8/1, v/v), the desired product was obtained as a colorless solid (50.9 mg, 94% yield, 97% ee). Chiral HPLC conditions: chiralcel AD-H, 25 °C, flow rate: 1.0 mL/min, hexane/isopropanol: 80/20, 254 nm, 9.5 min (*S*), 12.1 min (*R*);  $[\alpha]_D^{25} = 63.2^\circ$  ( $c = 0.63$ ,  $\text{CHCl}_3$ );  $^1\text{H}$  NMR (400 MHz,  $\text{CHloroform-}d$ )  $\delta$  7.74 - 7.66 (m, 1H), 7.48 - 7.45 (m, 3H), 7.37 - 7.27 (m, 2H), 6.88 - 6.84 (m, 2H), 3.77 (s, 3H), 3.68 (br.s, 1H), 2.08 (s, 3H);  $^{13}\text{C}$  NMR (101 MHz,  $\text{CDCl}_3$ )  $\delta$  169.6, 159.2, 151.0, 140.4, 135.9, 126.3, 125.1, 124.5, 120.1, 113.8, 110.8, 73.3, 55.2, 28.6; IR (KBr,  $\text{cm}^{-1}$ ): 3378, 2992, 2934, 2836, 1610, 1511, 1455, 1302, 1248, 1178, 1031, 928, 831, 748; HRMS (ESI):  $m/z$  calcd. for  $[\text{M}+\text{H}, \text{C}_{16}\text{H}_{16}\text{NO}_3]^+$  : 270.1125; found: 270.1130.

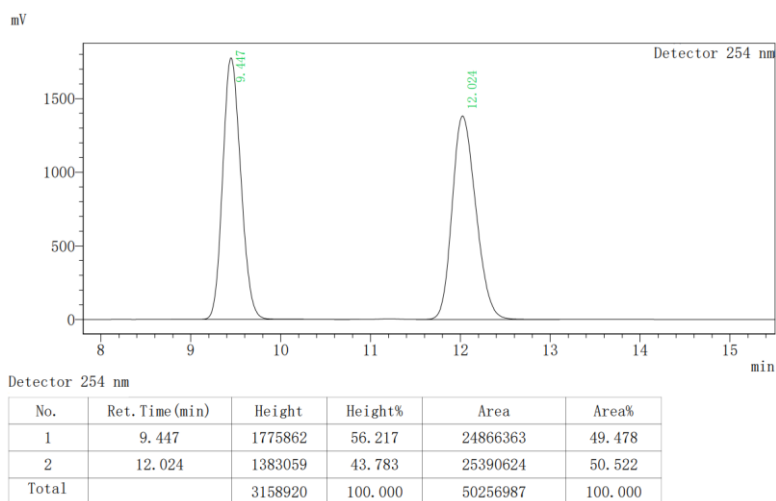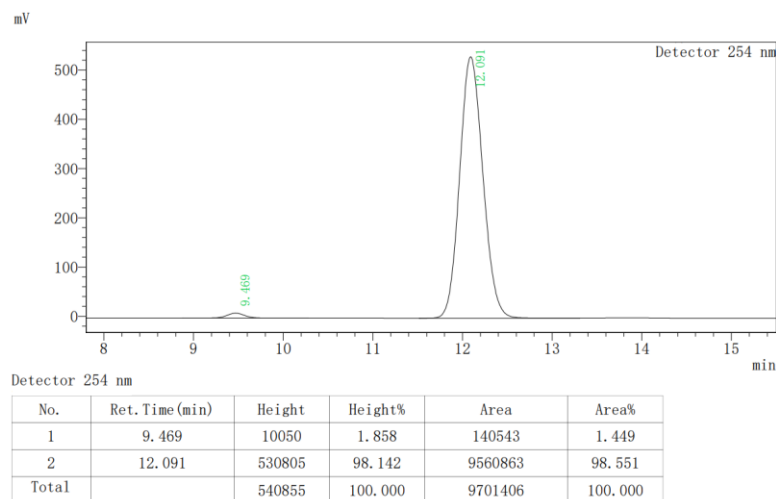

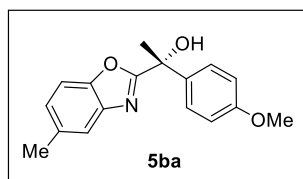

**(*R*)-1-(4-methoxyphenyl)-1-(5-methylbenzo[d]oxazol-2-yl)ethan-1-ol (5ba):** General Procedure B was followed using **4b** (35.0 mg, 0.20 mmol) and (4-methoxyphenyl) boronic acid (76.0 mg, 0.50 mmol). After flash chromatography with petroleum ether/ethyl acetate (8/1, v/v), the desired product was obtained as a colorless oil (51.1 mg, 90% yield, 96% ee). Chiral HPLC conditions: chiralcel OD-H, 25 °C, flow rate: 1.0 mL/min, hexane/isopropanol: 80/20, 254 nm, 6.0 min (*S*), 6.7 min (*R*);  $[\alpha]_D^{25} = 39.1^\circ$  ( $c = 2.57$ ,  $\text{CHCl}_3$ );  $^1\text{H}$  NMR (400 MHz,  $\text{CHloroform-}d$ )  $\delta$  7.51 - 7.40 (m, 3H), 7.33 - 7.31 (m, 1H), 7.10 (dd,  $J = 8.4, 1.6$  Hz, 1H), 6.90 - 6.81 (m, 2H), 4.26 (br.s, 1H), 3.76 (s, 3H), 2.43 (s, 3H), 2.08 (s, 3H);  $^{13}\text{C}$  NMR (101 MHz,  $\text{CDCl}_3$ )  $\delta$  169.8, 159.1, 149.2, 140.5, 136.1, 134.2, 126.3, 126.1, 119.9, 113.7, 110.1, 73.2, 55.1, 28.5, 21.3; IR (KBr,  $\text{cm}^{-1}$ ): 3398, 2999, 2932, 2836, 1610, 1562, 1511, 1462, 1301, 1251, 1178, 1032, 958, 832, 801; HRMS (ESI):  $m/z$  calcd. for  $[\text{M}+\text{H}, \text{C}_{17}\text{H}_{18}\text{NO}_3]^+$ : 284.1281; found: 284.1285.

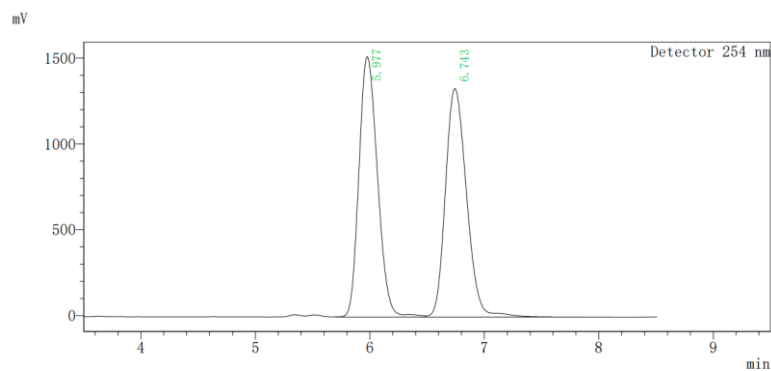

| No.   | Ret. Time (min) | Height  | Height% | Area     | Area%   |
|-------|-----------------|---------|---------|----------|---------|
| 1     | 5.977           | 1516948 | 53.246  | 17012728 | 49.837  |
| 2     | 6.743           | 1331987 | 46.754  | 17124158 | 50.163  |
| Total |                 | 2848935 | 100.000 | 34136886 | 100.000 |

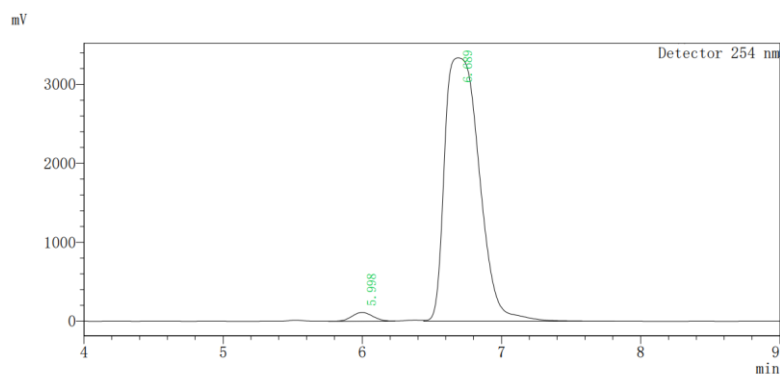

| No.   | Ret. Time (min) | Height  | Height% | Area     | Area%   |
|-------|-----------------|---------|---------|----------|---------|
| 1     | 5.998           | 112258  | 3.256   | 1175301  | 1.998   |
| 2     | 6.689           | 3335164 | 96.744  | 57654606 | 98.002  |
| Total |                 | 3447422 | 100.000 | 58829908 | 100.000 |

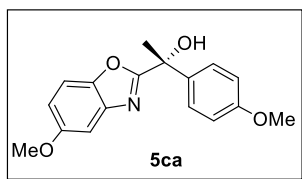

**(*R*)-1-(5-methoxybenzo[d]oxazol-2-yl)-1-(4-methoxyphenyl)ethan-1-ol (5ca):** General Procedure B was followed using **4c** (38.2 mg, 0.20 mmol) and (4-methoxyphenyl)boronic acid (76.0 mg, 0.50 mmol). After flash chromatography with petroleum ether/ethyl acetate (8/1, v/v), the desired product was obtained as a colorless oil (54.8 mg, 91% yield, 97% ee). Chiral HPLC conditions: chiralcel AD-H, 25 °C, flow rate: 1.0 mL/min, hexane/isopropanol: 80/20, 254 nm, 10.6 min (*S*), 16.4 min (*R*);  $[\alpha]_D^{25} = 33.0^\circ$  ( $c = 0.26$ ,  $\text{CHCl}_3$ );  $^1\text{H}$  NMR (400 MHz,  $\text{CHloroform-}d$ )  $\delta$  7.49 - 7.37 (m, 2H), 7.27 - 7.25 (m, 1H), 7.10 - 7.09 (m, 1H), 6.87 - 6.80 (m, 3H), 4.68 (br.s, 1H), 3.73 (d,  $J = 15.2$  Hz, 6H), 2.06 (s, 3H);  $^{13}\text{C}$  NMR (101 MHz,  $\text{CDCl}_3$ )  $\delta$  170.4, 158.9, 157.0, 145.4, 141.0, 136.0, 126.2, 113.5, 110.7, 102.9, 73.1, 55.7, 55.0, 28.5; IR (KBr,  $\text{cm}^{-1}$ ): 3447, 2996, 2936, 2836, 1611, 1559, 1511, 1340, 1151, 1029, 949, 834, 807; HRMS (ESI):  $m/z$  calcd. for  $[\text{M}+\text{H}, \text{C}_{17}\text{H}_{18}\text{NO}_4]^+$  : 300.1230; found: 300.1234.

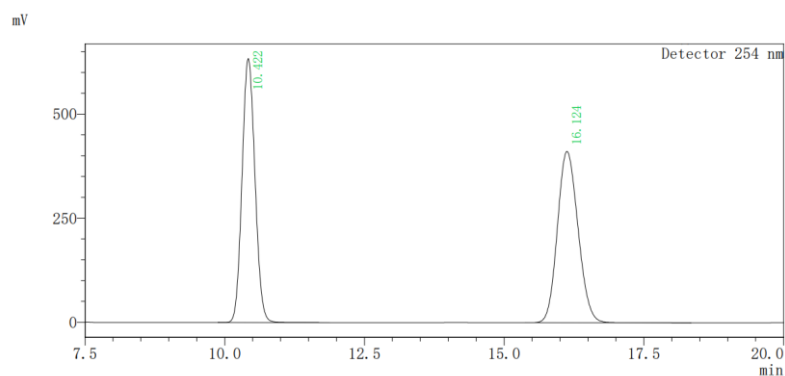

| No.   | Ret. Time (min) | Height  | Height% | Area     | Area%   |
|-------|-----------------|---------|---------|----------|---------|
| 1     | 10.422          | 634167  | 60.637  | 10208076 | 49.130  |
| 2     | 16.124          | 411675  | 39.363  | 10569515 | 50.870  |
| Total |                 | 1045842 | 100.000 | 20777591 | 100.000 |

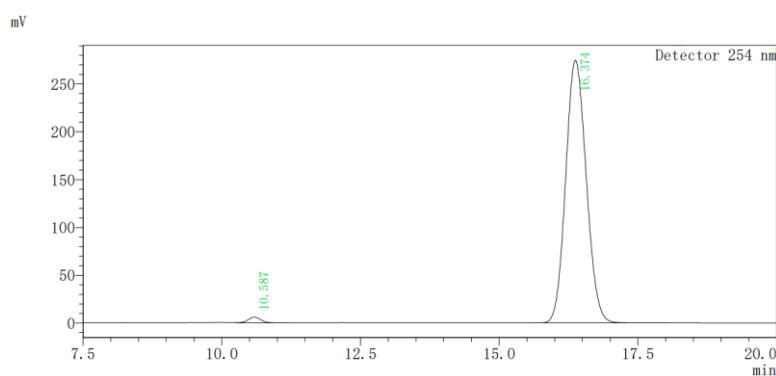

| No.   | Ret. Time (min) | Height | Height% | Area    | Area%   |
|-------|-----------------|--------|---------|---------|---------|
| 1     | 10.587          | 6054   | 2.155   | 96360   | 1.340   |
| 2     | 16.374          | 274877 | 97.845  | 7092518 | 98.660  |
| Total |                 | 280932 | 100.000 | 7188879 | 100.000 |

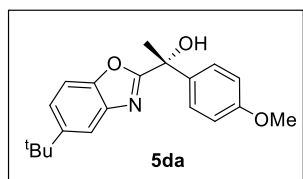

**(*R*)-1-(5-(tert-butyl)benzo[d]oxazol-2-yl)-1-(4-methoxyphenyl)ethan-1-ol (5da):** General Procedure B was followed using **4d** (43.4 mg, 0.20 mmol) and (4-methoxyphenyl)boronic acid (76.0 mg, 0.50 mmol). After chromatography with

petroleum ether/ethyl acetate (8/1, v/v), the desired product was obtained as a colorless oil (58.5 mg, 90% yield, 96% ee). Chiral HPLC conditions: chiralcel OD-H, 25 °C, flow rate: 1.0 mL/min, hexane/isopropanol: 97/3, 254 nm, 13.9 min (*S*), 15.3 min (*R*);  $[\alpha]_D^{25} = 36.0^\circ$  ( $c = 1.50$ ,  $\text{CHCl}_3$ );  $^1\text{H}$  NMR (400 MHz,  $\text{CHloroform-}d$ )  $\delta$  7.73 (s, 1H), 7.48 - 7.45 (m, 2H), 7.38 (s, 2H), 6.87 - 6.85 m, 2H), 4.07 (br.s, 0.71H), 3.78 (s, 3H), 2.07 (s, 3H), 1.36 (s, 9H);  $^{13}\text{C}$  NMR (101 MHz,  $\text{CDCl}_3$ )  $\delta$  169.8, 159.1, 149.0, 148.1, 140.2, 136.0, 126.3, 122.8, 116.6, 113.7, 110.0, 73.3, 55.2, 34.9, 31.7, 28.5; IR (KBr,  $\text{cm}^{-1}$ ): 3393, 2961, 2869, 2836, 1611, 1562, 1511, 1481, 1365, 1251, 1179, 936, 833, 810; HRMS (ESI):  $m/z$  calcd. for  $[\text{M}+\text{H}, \text{C}_{20}\text{H}_{24}\text{NO}_3]^+$  : 326.1751; found: 326.1758.

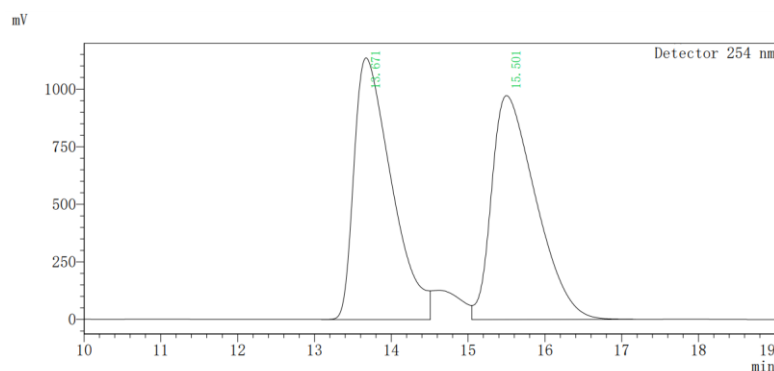

| No.   | Ret. Time (min) | Height  | Height% | Area     | Area%   |
|-------|-----------------|---------|---------|----------|---------|
| 1     | 13.671          | 1135231 | 53.877  | 38465859 | 49.682  |
| 2     | 15.501          | 971859  | 46.123  | 38957663 | 50.318  |
| Total |                 | 2107091 | 100.000 | 77423522 | 100.000 |

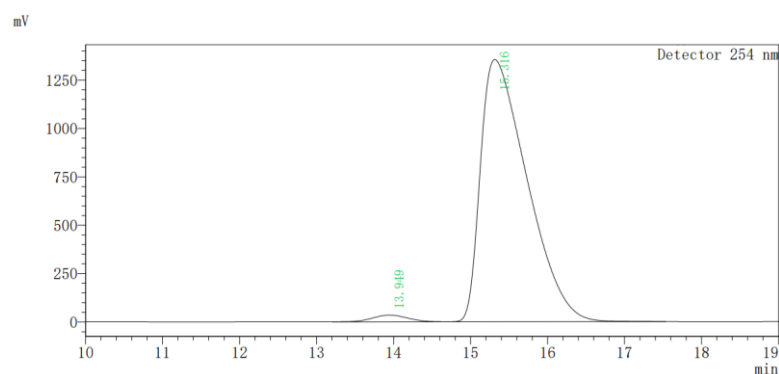

| No.   | Ret. Time (min) | Height  | Height% | Area     | Area%   |
|-------|-----------------|---------|---------|----------|---------|
| 1     | 13.949          | 34685   | 2.495   | 1127766  | 1.939   |
| 2     | 15.316          | 1355264 | 97.505  | 57028036 | 98.061  |
| Total |                 | 1389949 | 100.000 | 58155802 | 100.000 |

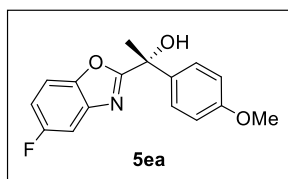

**(R)-1-(5-fluorobenzo[d]oxazol-2-yl)-1-(4-methoxyphenyl)ethan-1-ol (5ea):** General Procedure B was followed using **4e** (35.8 mg, 0.20 mmol) and (4-methoxyphenyl)boronic acid (76.0 mg, 0.50 mmol). After flash chromatography with petroleum ether/ethyl acetate (8/1, v/v), the desired product was obtained as a colorless oil (55.4 mg, 89% yield, 96% ee). Chiral HPLC conditions: chiralcel OD-H, 25 °C, flow rate: 1.0 mL/min, hexane/isopropanol: 85/15, 254 nm, 7.2 min (*R*), 7.9 min (*S*);  $[\alpha]_D^{25} = 43.9^\circ$  ( $c = 2.41$ ,  $\text{CHCl}_3$ );  $^1\text{H}$  NMR (400 MHz,  $\text{CHloroform-}d$ )  $\delta$  7.45 - 7.42 (m, 2H), 7.38 (m, 2H), 7.05 (td,  $J = 9.1, 2.5$  Hz, 1H), 6.89 - 6.84 (m, 2H), 3.78 (s, 3H), 2.06 (s, 3H);  $^{13}\text{C}$  NMR (101 MHz,  $\text{CDCl}_3$ )  $\delta$  171.4, 160.0 (d,  $J = 240.0$  Hz), 159.3, 147.4 (d,  $J = 1.0$  Hz), 141.2 (d,  $J = 13.0$  Hz), 135.6, 126.3, 113.8, 112.9 (d,  $J = 26.0$  Hz), 111.2 (d,  $J = 10.0$  Hz), 106.6 (d,  $J = 26.0$  Hz), 73.3, 55.2, 28.5;  $^{19}\text{F}$  NMR (377 MHz,  $\text{CDCl}_3$ )  $\delta$  -117.5 (s, 1F); IR (KBr): 3418, 2993, 2934, 2842, 1611, 1560, 1512, 1477, 1302, 1251, 1135, 1032, 959, 833, 806; HRMS (ESI):  $m/z$  calcd. for  $[\text{M}+\text{H}, \text{C}_{16}\text{H}_{14}\text{FNNaO}_3]^+$  : 310.0850; found: 310.0855.

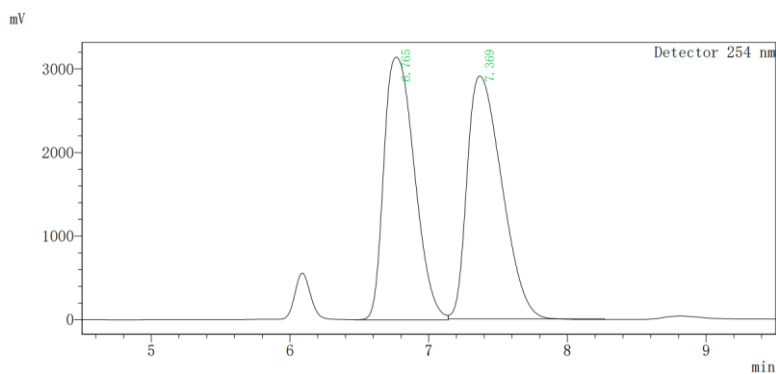

| No.   | Ret. Time (min) | Height  | Height% | Area     | Area%   |
|-------|-----------------|---------|---------|----------|---------|
| 1     | 6.765           | 3141207 | 51.955  | 48357824 | 49.035  |
| 2     | 7.369           | 2904818 | 48.045  | 50260593 | 50.965  |
| Total |                 | 6046026 | 100.000 | 98618417 | 100.000 |

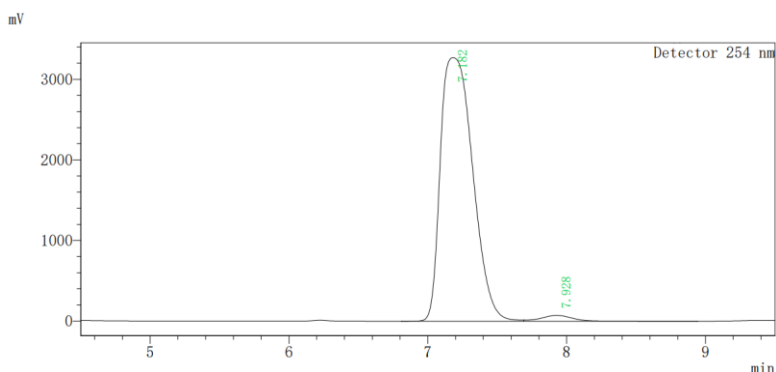

| No.   | Ret. Time (min) | Height  | Height% | Area     | Area%   |
|-------|-----------------|---------|---------|----------|---------|
| 1     | 7.182           | 3271014 | 97.845  | 52996452 | 97.922  |
| 2     | 7.928           | 72028   | 2.155   | 1124534  | 2.078   |
| Total |                 | 3343043 | 100.000 | 54120986 | 100.000 |

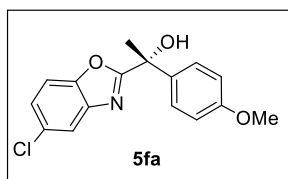

**(*R*)-1-(5-chlorobenzo[d]oxazol-2-yl)-1-(4-methoxyphenyl)ethan-1-ol (5fa):** General Procedure B was followed using **4f** (39.0 mg, 0.20 mmol) and (4-methoxyphenyl)boronic acid (76.0 mg, 0.50 mmol). After flash chromatography with petroleum ether/ethyl acetate (8/1, v/v), the desired product was obtained as a colorless oil (52.3 mg, 86% yield, 96% ee). Chiral HPLC conditions: chiralcel OD-H, 25 °C, flow rate: 1.0 mL/min, hexane/isopropanol: 80/20, 254 nm, 6.6 min (*R*), 7.7 min (*S*);  $[\alpha]_D^{25} = 31.0^\circ$  ( $c = 1.45$ ,  $\text{CHCl}_3$ );  $^1\text{H}$  NMR (400 MHz,  $\text{CHloroform-}d$ )  $\delta$  7.64 (d,  $J = 2.0$  Hz, 1H), 7.48 - 7.40 (m, 2H), 7.39 - 7.37 (m, 1H), 7.30 - 7.29 (m, 1H), 6.90 - 6.83 (m, 2H), 3.78 (s, 3H), 3.40 (br.s, 1H), 2.06 (s, 3H);  $^{13}\text{C}$  NMR (101 MHz,  $\text{CDCl}_3$ )  $\delta$  171.1, 159.3, 149.5, 141.5, 135.5, 130.0, 126.3, 125.5, 120.1, 113.8, 111.5, 73.3, 55.2, 28.5; IR (KBr,  $\text{cm}^{-1}$ ): 3335, 2993, 2933, 2836, 1610, 1557, 1511, 1451, 1301, 1253, 1178, 1031, 920, 831, 705; HRMS (ESI):  $m/z$  calcd. for  $[\text{M}+\text{H}, \text{C}_{16}\text{H}_{15}\text{ClNO}_3]^+$ : 304.0735; found: 304.0737.

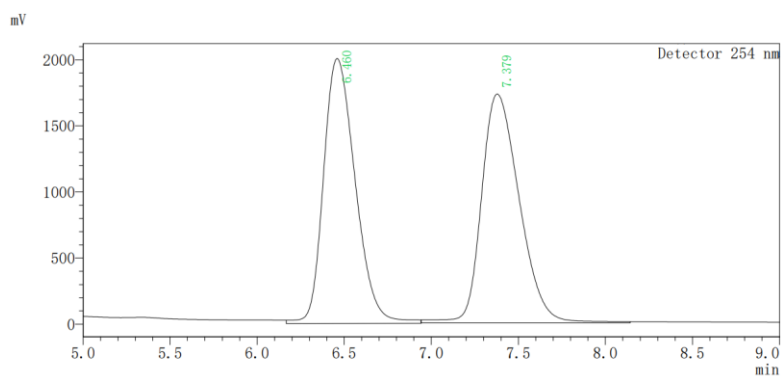

| No.   | Ret. Time (min) | Height  | Height% | Area     | Area%   |
|-------|-----------------|---------|---------|----------|---------|
| 1     | 6.460           | 2004885 | 53.659  | 25508421 | 49.264  |
| 2     | 7.379           | 1731465 | 46.341  | 26270951 | 50.736  |
| Total |                 | 3736350 | 100.000 | 51779372 | 100.000 |

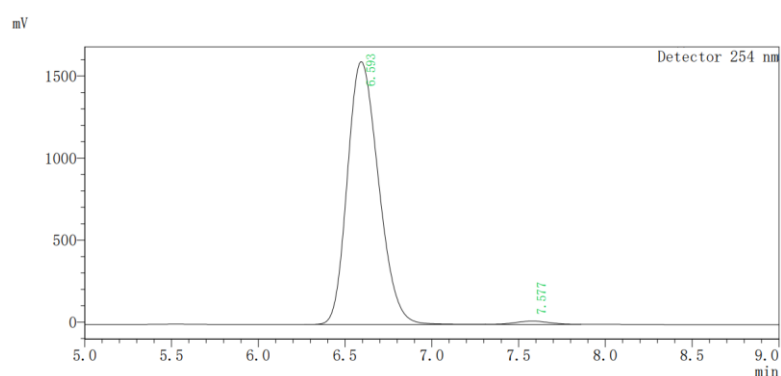

| No.   | Ret. Time (min) | Height  | Height% | Area     | Area%   |
|-------|-----------------|---------|---------|----------|---------|
| 1     | 6.593           | 1602284 | 98.731  | 19999260 | 98.537  |
| 2     | 7.577           | 20601   | 1.269   | 296869   | 1.463   |
| Total |                 | 1622885 | 100.000 | 20296129 | 100.000 |

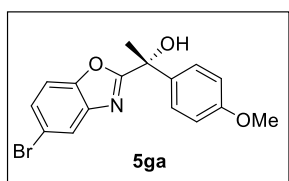

**(*R*)-1-(5-bromobenzo[d]oxazol-2-yl)-1-(4-methoxyphenyl)ethan-1-ol (5ga):** General Procedure B was followed using **4g** (47.8 mg, 0.20 mmol) and (4-methoxyphenyl)boronic acid (76.0 mg, 0.50 mmol). After flash chromatography with petroleum ether/ethyl acetate (8/1, v/v), the desired product was obtained as a yellow solid (58.7 mg, 84% yield, 96% ee). Chiral HPLC conditions: chiralcel OD-H, 25 °C, flow rate: 1.0 mL/min, hexane/isopropanol: 85/15, 254 nm, 8.1 min (*R*), 10.1 min (*S*);  $[\alpha]_D^{25} = 23.8^\circ$  ( $c = 1.18$ ,  $\text{CHCl}_3$ );  $^1\text{H}$  NMR (400 MHz,  $\text{CHloroform-}d$ )  $\delta$  7.82 (d,  $J = 1.9$  Hz, 1H), 7.47 - 7.40 (m, 3H), 7.36 - 7.34 (m, 1H), 6.91 - 6.82 (m, 2H), 3.78 (s, 3H), 3.52 (br.s, 1H), 2.06 (s, 3H);  $^{13}\text{C}$  NMR (101 MHz,  $\text{CDCl}_3$ )  $\delta$  170.8, 159.3, 150.0, 142.0, 135.5, 128.2, 126.3, 123.2, 117.3, 113.8, 112.1, 73.3, 55.2, 28.5; IR (KBr,  $\text{cm}^{-1}$ ): 3395, 2960, 2927, 2853, 1610, 1557, 1502, 1448, 1302, 1248, 1178, 1033, 908, 831, 802; HRMS (ESI):  $m/z$  calcd. for  $[\text{M}+\text{H}, \text{C}_{16}\text{H}_{15}\text{BrNO}_3]^+$  : 348.0230; found: 348.0233.

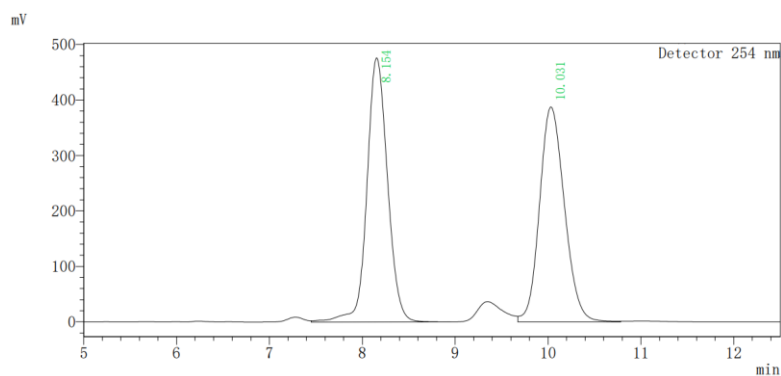

| No.   | Ret. Time (min) | Height | Height% | Area     | Area%   |
|-------|-----------------|--------|---------|----------|---------|
| 1     | 8.154           | 476078 | 55.102  | 7373990  | 50.371  |
| 2     | 10.031          | 387916 | 44.898  | 7265252  | 49.629  |
| Total |                 | 863994 | 100.000 | 14639242 | 100.000 |

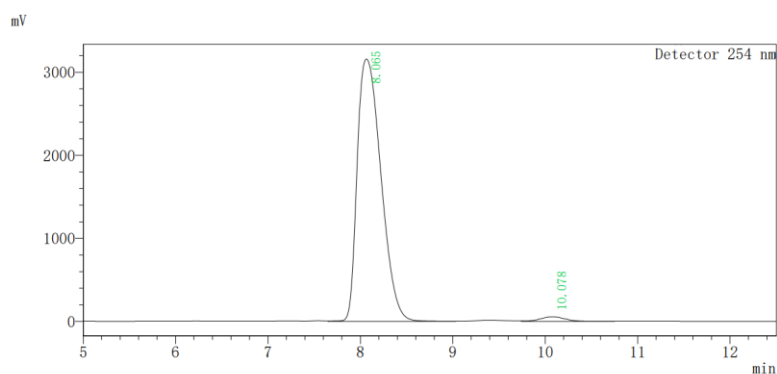

| No.   | Ret. Time (min) | Height  | Height% | Area     | Area%   |
|-------|-----------------|---------|---------|----------|---------|
| 1     | 8.065           | 3158934 | 98.269  | 56292217 | 98.116  |
| 2     | 10.078          | 55656   | 1.731   | 1080730  | 1.884   |
| Total |                 | 3214590 | 100.000 | 57372947 | 100.000 |

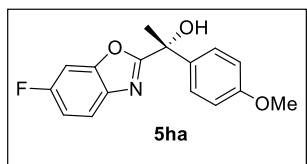

**(*R*)-1-(6-fluorobenzo[d]oxazol-2-yl)-1-(4-methoxyphenyl)ethan-1-ol (5ha):** General Procedure B was followed using **4h** (35.8 mg, 0.20 mmol) and (4-methoxyphenyl)boronic acid (76.0 mg, 0.50 mmol). After chromatography

with petroleum ether/ethyl acetate (8/1, v/v), the desired product was obtained as a colorless solid (51.7 mg, 90% yield, 97% ee). Chiral HPLC conditions: chiralcel AD-H, 25 °C, flow rate: 1.0 mL/min, hexane/isopropanol: 90/10, 254 nm, 14.9 min (*S*), 17.9 min (*R*);  $[\alpha]_D^{25} = 42.6^\circ$  ( $c = 2.50$ ,  $\text{CHCl}_3$ );  $^1\text{H}$  NMR (400 MHz,  $\text{CHloroform-}d$ )  $\delta$  7.62 (dd,  $J = 8.8, 4.8$  Hz, 1H), 7.48 - 7.41 (m, 2H), 7.19 (dd,  $J = 7.9, 2.4$  Hz, 1H), 7.07 (ddd,  $J = 9.5, 8.7, 2.4$  Hz, 1H), 6.90 - 6.84 (m, 2H), 3.78 (s, 3H), 3.14 (br.s, 1H), 2.06 (s, 3H);  $^{13}\text{C}$  NMR (101 MHz,  $\text{CHloroform-}d$ )  $\delta$  170.0 (d,  $J = 3.7$  Hz), 160.6 (d,  $J = 244.5$  Hz), 159.3, 156.0 (d,  $J = 14.7$  Hz), 136.7, 135.6, 126.3, 120.5 (d,  $J = 10.0$  Hz), 113.9, 112.5 (d,  $J = 24.7$  Hz), 98.9 (d,  $J = 28.2$  Hz), 73.3, 55.2, 28.6;  $^{19}\text{F}$  NMR (377 MHz,  $\text{CDCl}_3$ )  $\delta$  -114.8 (s, 1F); IR (KBr,  $\text{cm}^{-1}$ ): 3263, 2960, 2927, 2854, 1617, 1541, 1509, 1483, 1250, 1177, 1079, 1031, 953, 832, 812; HRMS (ESI):  $m/z$  calcd. for  $[\text{M}+\text{H}, \text{C}_{16}\text{H}_{15}\text{FNO}_3]^+$ : 288.1030; found: 288.1031.

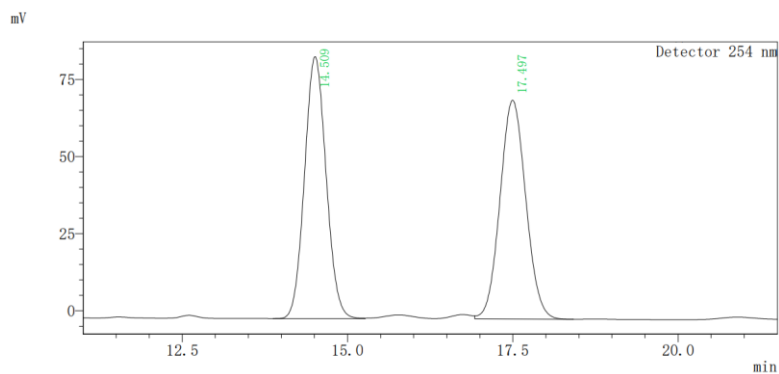

Detector 254 nm

| No.   | Ret. Time (min) | Height | Height% | Area    | Area%   |
|-------|-----------------|--------|---------|---------|---------|
| 1     | 14.509          | 84911  | 54.500  | 1931172 | 50.050  |
| 2     | 17.497          | 70889  | 45.500  | 1927311 | 49.950  |
| Total |                 | 155800 | 100.000 | 3858483 | 100.000 |

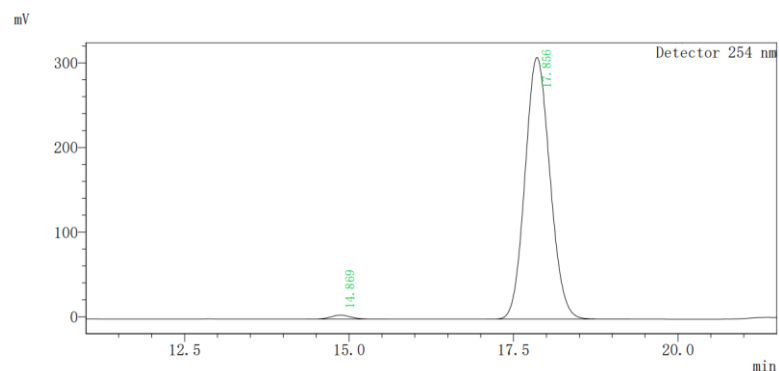

Detector 254 nm

| No.   | Ret. Time (min) | Height | Height% | Area    | Area%   |
|-------|-----------------|--------|---------|---------|---------|
| 1     | 14.869          | 4717   | 1.502   | 101033  | 1.222   |
| 2     | 17.856          | 309374 | 98.498  | 8164615 | 98.778  |
| Total |                 | 314091 | 100.000 | 8265648 | 100.000 |

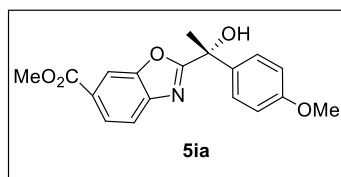

**Methyl-(*R*)-2-(1-hydroxy-1-(4-methoxyphenyl)ethyl)benzo[d]oxazole-6-carboxylate (5ia):** General Procedure B was followed using **4i** (43.8 mg, 0.20 mmol) and (4-methoxyphenyl)boronic acid (76.0 mg, 0.50 mmol).

After flash chromatography with petroleum ether/ethyl acetate (8/1, v/v), the desired product was obtained as a colorless oil (58.4 mg, 89% yield, 98% ee). Chiral HPLC conditions: chiralcel AD-H, 25 °C, flow rate: 1.0 mL/min, hexane/isopropanol: 80/20, 254 nm, 12.2 min (*S*), 16.0 min (*R*);  $[\alpha]_D^{25} = 65.8^\circ$  ( $c = 2.65$ ,  $\text{CHCl}_3$ );  $^1\text{H}$  NMR (400 MHz,  $\text{CHloroform-}d$ )  $\delta$  8.14 (d,  $J = 1.5$  Hz, 1H), 8.05 - 8.03 (m, 1H), 7.71 - 7.70 (m, 1H), 7.50 - 7.36 (m, 2H), 6.95 - 6.81 (m, 2H), 3.93 (s, 3H), 3.77 (s, 3H), 2.08 (s, 3H);  $^{13}\text{C}$  NMR (101 MHz,  $\text{CDCl}_3$ )  $\delta$  172.2, 166.5, 159.3, 150.7, 144.3, 135.4, 127.3, 126.3, 126.2, 119.7, 113.8, 112.5, 73.4, 55.2, 52.4, 28.5; IR (KBr,  $\text{cm}^{-1}$ ): 3445, 2996, 2953, 2836, 1720, 1607, 1511, 1434, 1295, 1254, 1178, 1074, 834, 775, 746; HRMS (ESI):  $m/z$  calcd. for  $[\text{M}+\text{H}, \text{C}_{18}\text{H}_{18}\text{NO}_5]^+$  : 328.1179; found: 328.1180.

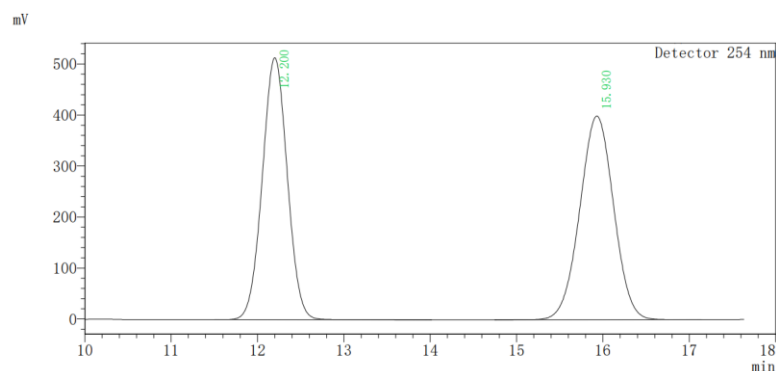

| No.   | Ret. Time (min) | Height | Height% | Area     | Area%   |
|-------|-----------------|--------|---------|----------|---------|
| 1     | 12.200          | 513544 | 56.268  | 10334757 | 48.696  |
| 2     | 15.930          | 399134 | 43.732  | 10888304 | 51.304  |
| Total |                 | 912678 | 100.000 | 21223061 | 100.000 |

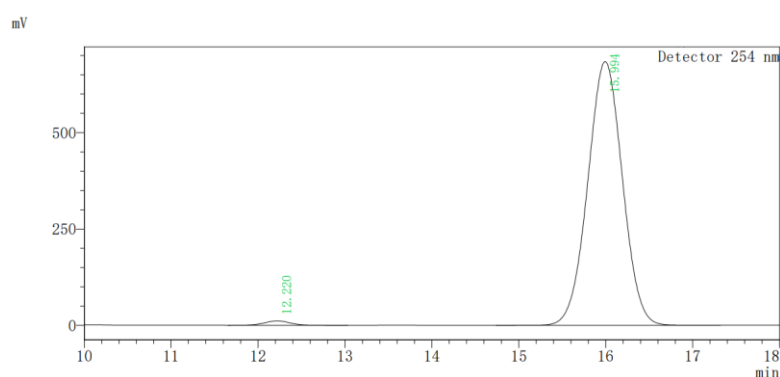

| No.   | Ret. Time (min) | Height | Height% | Area     | Area%   |
|-------|-----------------|--------|---------|----------|---------|
| 1     | 12.220          | 11277  | 1.622   | 230344   | 1.200   |
| 2     | 15.994          | 683968 | 98.378  | 18971343 | 98.800  |
| Total |                 | 695245 | 100.000 | 19201686 | 100.000 |

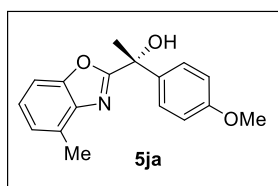

**(R)-1-(4-methoxyphenyl)-1-(4-methylbenzo[d]oxazol-2-yl)ethan-1-ol (5ja):** General Procedure B was followed using **4j** (35.0 mg, 0.20 mmol) and (4-methoxyphenyl)boronic acid (76.0 mg, 0.50 mmol). After flash chromatography with

petroleum ether/ethyl acetate (8/1, v/v), the desired product was obtained as a colorless oil (51.1 mg, 90% yield, 95% ee). Chiral HPLC conditions: chiralpak IA, 25 °C, flow rate: 1.0 mL/min, hexane/ isopropanol: 95/5, 254 nm, 11.5 min (*S*), 12.1 min (*R*);  $[\alpha]_D^{25} = 34.8^\circ$  ( $c = 2.21$ ,  $\text{CHCl}_3$ );  $^1\text{H}$  NMR (400 MHz,  $\text{CHloroform-}d$ )  $\delta$  7.53 - 7.45 (m, 2H), 7.32 - 7.30 (m, 1H), 7.21 (t,  $J = 7.8$  Hz, 1H), 7.14 - 7.12 (m, 1H), 6.92 - 6.84 (m, 2H), 4.05 (br.s, 0.84H), 3.78 (s, 3H), 2.62 (s, 3H), 2.07 (s, 3H);  $^{13}\text{C}$  NMR (101 MHz,  $\text{CDCl}_3$ )  $\delta$  168.7, 159.1, 150.9, 139.6, 136.0, 130.7, 126.3, 125.0, 124.7, 113.7, 108.0, 73.3, 55.2, 28.5, 16.5; IR (KBr,  $\text{cm}^{-1}$ ): 3427, 2991, 2931, 2836, 1608, 1511, 1456, 1302, 1249, 1178, 1033, 832, 778, 757; HRMS (ESI):  $m/z$  calcd. for  $[\text{M}+\text{H}, \text{C}_{17}\text{H}_{18}\text{NO}_3]^+$ : 284.1281; found: 284.1286.

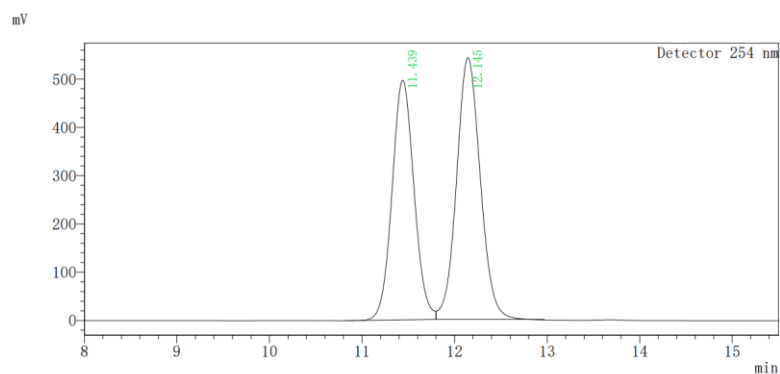

| No.   | Ret. Time (min) | Height  | Height% | Area     | Area%   |
|-------|-----------------|---------|---------|----------|---------|
| 1     | 11.439          | 496267  | 47.795  | 8196123  | 45.851  |
| 2     | 12.145          | 542047  | 52.205  | 9679463  | 54.149  |
| Total |                 | 1038315 | 100.000 | 17875585 | 100.000 |

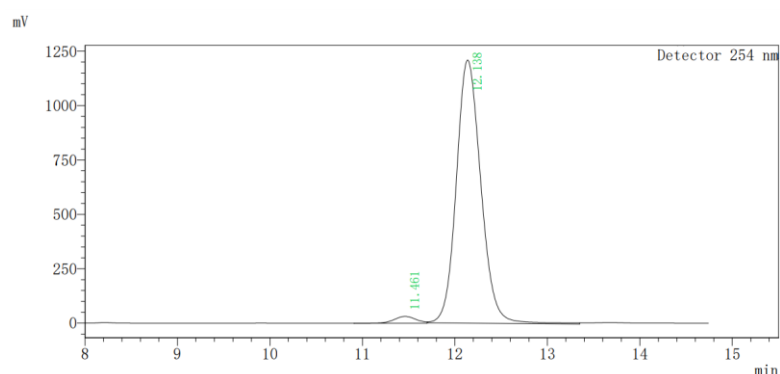

| No.   | Ret. Time (min) | Height  | Height% | Area     | Area%   |
|-------|-----------------|---------|---------|----------|---------|
| 1     | 11.461          | 31513   | 2.541   | 514935   | 2.248   |
| 2     | 12.138          | 1208743 | 97.459  | 22389291 | 97.752  |
| Total |                 | 1240256 | 100.000 | 22904225 | 100.000 |

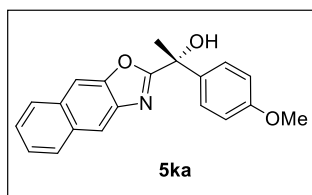

**(*R*)-1-(4-methoxyphenyl)-1-(naphtho[2,3-d]oxazol-2-yl)ethan-1-ol (5ka):** General Procedure B was followed using **4k** (42.2 mg, 0.20 mmol) and (4-methoxyphenyl)boronic acid (76.0 mg, 0.50 mmol). After chromatography with petroleum ether/ethyl acetate (8/1, v/v), the desired product was obtained as a colorless solid (54.2 mg, 85% yield, 96% ee). Chiral HPLC conditions: chiralcel OD-H, 25 °C, flow rate: 1.0 mL/min, hexane/isopropanol: 80/20, 254 nm, 9.0 min (*R*), 10.4 min (*S*);  $[\alpha]_D^{25} = 56.5^\circ$  ( $c = 1.16$ ,  $\text{CHCl}_3$ );  $^1\text{H}$  NMR (400 MHz,  $\text{CHloroform-}d$ )  $\delta$  8.13 (s, 1H), 8.02 - 7.95 (m, 1H), 7.95 - 7.88 (m, 1H), 7.85 (s, 1H), 7.58 - 7.42 (m, 4H), 6.93 - 6.84 (m, 2H), 3.91 (s, 1H), 3.78 (s, 3H), 2.12 (s, 3H);  $^{13}\text{C}$  NMR (101 MHz,  $\text{CDCl}_3$ )  $\delta$  171.7, 159.3, 150.0, 140.4, 135.6, 131.6, 131.3, 128.5, 127.9, 126.4, 125.6, 124.8, 117.7, 113.9, 106.8, 73.4, 55.3, 28.4; IR (KBr,  $\text{cm}^{-1}$ ): 3345, 3053, 2996, 2932, 2834, 1610, 1511, 1443, 1302, 1248, 1179, 1073, 1033, 865, 834, 742; HRMS (ESI):  $m/z$  calcd. for  $[\text{M}+\text{H}, \text{C}_{20}\text{H}_{18}\text{NO}_3]^+$  : 320.1281; found: 320.1282.

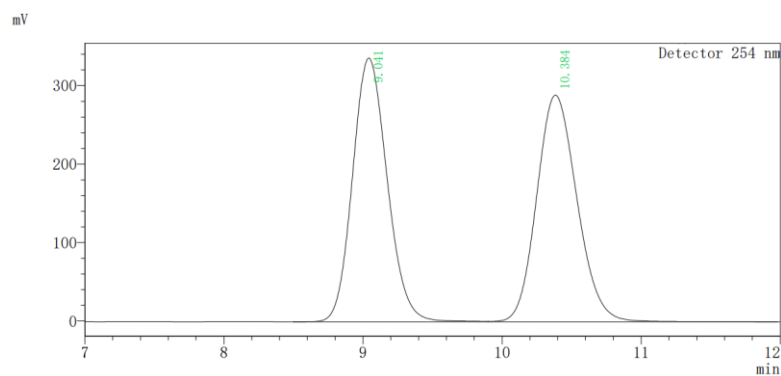

| No.   | Ret. Time (min) | Height | Height% | Area     | Area%   |
|-------|-----------------|--------|---------|----------|---------|
| 1     | 9.041           | 336096 | 53.784  | 5804148  | 49.950  |
| 2     | 10.384          | 288798 | 46.216  | 5815689  | 50.050  |
| Total |                 | 624894 | 100.000 | 11619837 | 100.000 |

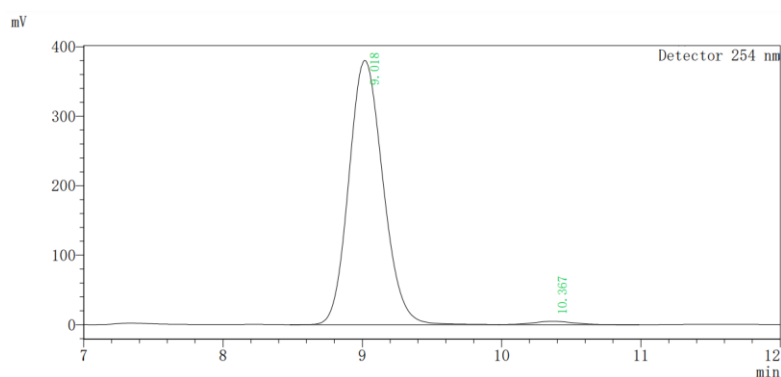

| No.   | Ret. Time (min) | Height | Height% | Area    | Area%   |
|-------|-----------------|--------|---------|---------|---------|
| 1     | 9.018           | 380412 | 98.732  | 6475901 | 98.390  |
| 2     | 10.367          | 4887   | 1.268   | 105951  | 1.610   |
| Total |                 | 385299 | 100.000 | 6581851 | 100.000 |

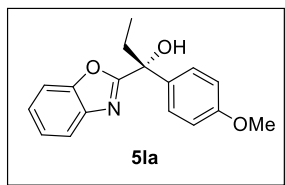

**(*R*)-1-(benzo[d]oxazol-2-yl)-1-(4-methoxyphenyl)propan-1**

**-ol (5la):** General Procedure B was followed using **4l** (35.0 mg, 0.20 mmol) and (4-methoxyphenyl)boronic acid (76.0 mg, 0.50 mmol). After flash chromatography with petroleum

ether/ethyl acetate (10/1, v/v), the desired product was obtained as a colorless oil (47.4 mg, 83% yield, 97% ee). Chiral HPLC conditions: chiralcel AD-H, 25 °C, flow rate: 1.0 mL/min, hexane/isopropanol: 85/15, 254 nm, 11.2 min (*R*), 16.7 min (*S*);  $[\alpha]_D^{25} = 60.3^\circ$  ( $c = 2.39$ ,  $\text{CHCl}_3$ );  $^1\text{H}$  NMR (400 MHz,  $\text{CHloroform-}d$ )  $\delta$  7.76 - 7.67 (m, 1H), 7.58 - 7.46 (m, 3H), 7.37 - 7.28 (m, 2H), 6.93 - 6.84 (m, 2H), 3.78 (s, 3H), 2.49 (dq,  $J = 14.5$ , 7.3 Hz, 1H), 2.35 (dq,  $J = 14.6$ , 7.4 Hz, 1H), 0.96 (t,  $J = 7.3$  Hz, 3H);  $^{13}\text{C}$  NMR (101 MHz,  $\text{CDCl}_3$ )  $\delta$  169.2, 159.0, 151.2, 140.3, 134.7, 126.6, 125.0, 124.5, 120.0, 113.7, 110.8, 76.1, 55.2, 33.9, 7.9; IR (KBr,  $\text{cm}^{-1}$ ): 3441, 2970, 2935, 2836, 1610, 1558, 1511, 1455, 1302, 1247, 1177, 1034, 1003, 880, 831, 748; HRMS (ESI):  $m/z$  calcd. for  $[\text{M}+\text{H}, \text{C}_{17}\text{H}_{18}\text{NO}_3]^+$  : 284.1281; found: 284.1284.

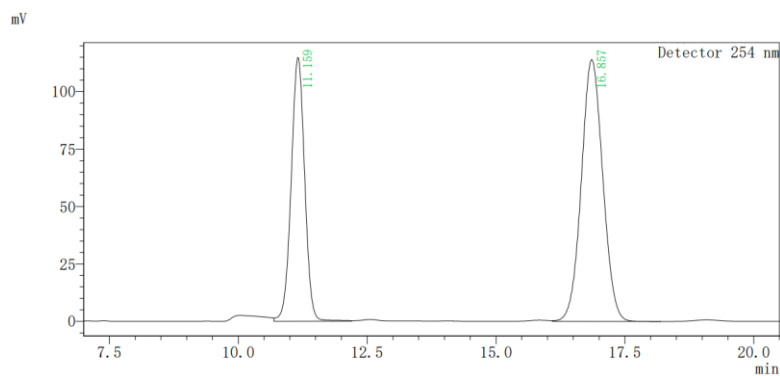

| No.   | Ret. Time (min) | Height | Height% | Area    | Area%   |
|-------|-----------------|--------|---------|---------|---------|
| 1     | 11.159          | 114842 | 50.188  | 2095992 | 38.826  |
| 2     | 16.857          | 113982 | 49.812  | 3302458 | 61.174  |
| Total |                 | 228824 | 100.000 | 5398450 | 100.000 |

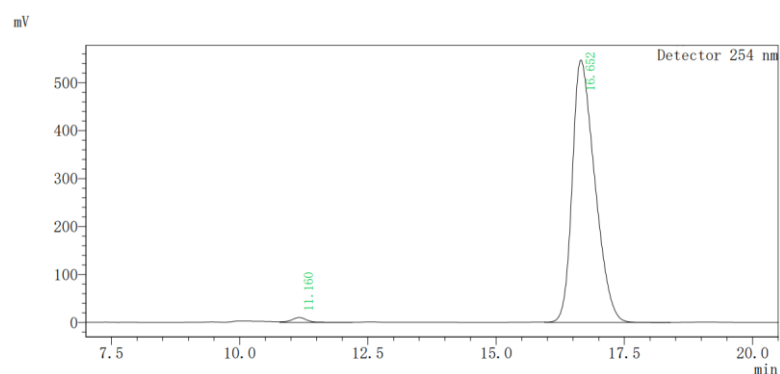

| No.   | Ret. Time (min) | Height | Height% | Area     | Area%   |
|-------|-----------------|--------|---------|----------|---------|
| 1     | 11.160          | 10190  | 1.829   | 217733   | 1.283   |
| 2     | 16.652          | 546951 | 98.171  | 16747824 | 98.717  |
| Total |                 | 557141 | 100.000 | 16965557 | 100.000 |

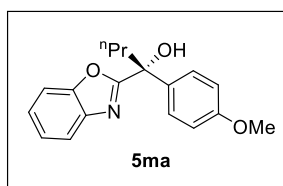

**(*R*)-1-(benzo[d]oxazol-2-yl)-1-(4-methoxyphenyl)butan-1-ol (5ma):** General Procedure B was followed using **4m** (37.8 mg, 0.20 mmol) and (4-methoxyphenyl)boronic acid (121.6 mg, 0.8 mmol). After flash chromatography with petroleum ether/ethyl acetate (12/1, v/v), the desired product was obtained as a colorless oil (34.7 mg, 58% yield, 93% ee). Chiral HPLC conditions: chiralcel OD-H, 25 °C, flow rate: 1.0 mL/min, hexane/isopropanol: 80/20, 230 nm, 4.9 min (*R*), 5.3 min (*S*);  $[\alpha]_D^{25} = 63.5^\circ$  ( $c = 0.88$ ,  $\text{CHCl}_3$ );  $^1\text{H}$  NMR (400 MHz,  $\text{CHloroform-}d$ )  $\delta$  7.76 - 7.68 (m, 1H), 7.59 - 7.51 (m, 2H), 7.51 - 7.47 (m, 1H), 7.36 - 7.28 (m, 2H), 6.95 - 6.81 (m, 2H), 3.93 (br.s, 0.8H), 3.78 (s, 3H), 2.43 (ddd,  $J = 13.7, 11.6, 4.8$  Hz, 1H), 2.32 (ddd,  $J = 13.8, 11.7, 4.7$  Hz, 1H), 1.50 - 1.48 (m, 1H), 1.34 - 1.30 (m, 1H), 0.94 (t,  $J = 7.4$  Hz, 3H);  $^{13}\text{C}$  NMR (101 MHz,  $\text{CDCl}_3$ )  $\delta$  169.4, 159.0, 151.1, 140.3, 135.0, 126.6, 125.0, 124.4, 120.0, 113.6, 110.8, 75.8, 55.1, 43.2, 16.8, 14.1; IR (KBr,  $\text{cm}^{-1}$ ): 3444, 2960, 2931, 2873, 1610, 1559, 1511, 1455, 1300, 1248, 1177, 1035, 830, 746; HRMS (ESI):  $m/z$  calcd. for  $[\text{M}+\text{H}, \text{C}_{18}\text{H}_{20}\text{NO}_3]^+$  : 298.1438; found: 298.1440.

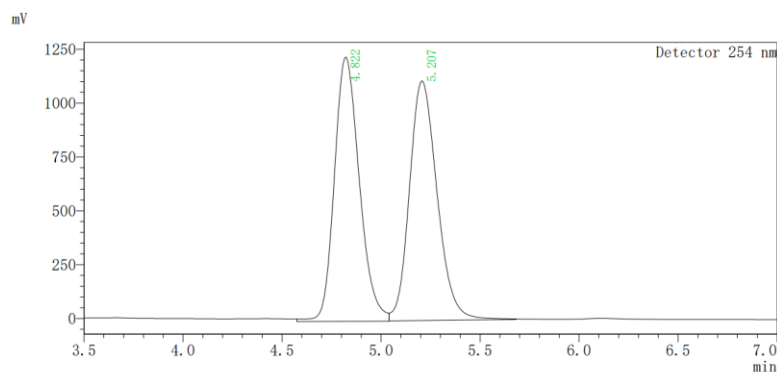

| No.   | Ret. Time (min) | Height  | Height% | Area     | Area%   |
|-------|-----------------|---------|---------|----------|---------|
| 1     | 4.822           | 1226880 | 52.441  | 10787105 | 49.953  |
| 2     | 5.207           | 1112682 | 47.559  | 10807489 | 50.047  |
| Total |                 | 2339562 | 100.000 | 21594594 | 100.000 |

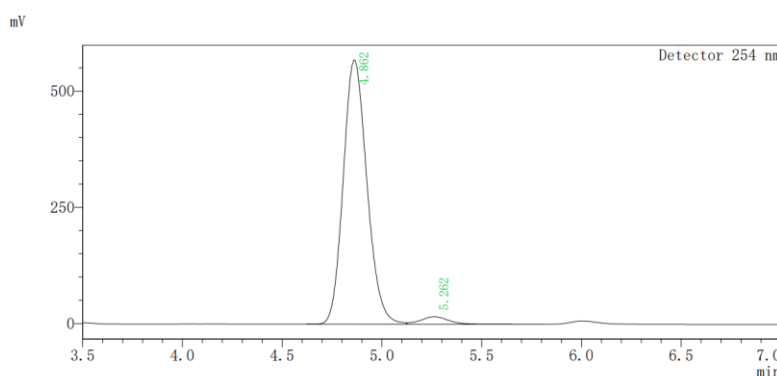

| No.   | Ret. Time (min) | Height | Height% | Area    | Area%   |
|-------|-----------------|--------|---------|---------|---------|
| 1     | 4.862           | 567680 | 97.244  | 4691899 | 96.779  |
| 2     | 5.262           | 16091  | 2.756   | 156156  | 3.221   |
| Total |                 | 583771 | 100.000 | 4848056 | 100.000 |

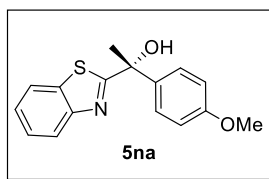

**(*R*)-1-(benzo[d]thiazol-2-yl)-1-(4-methoxyphenyl)ethan-1-ol (5na):** General Procedure B was followed using **4n** (35.4 mg, 0.20 mmol) and (4-methoxyphenyl)boronic acid (76.0 mg, 0.50 mmol). After flash chromatography with petroleum ether/ethyl acetate (10/1, v/v), the desired product was obtained as a colorless oil (42.3 mg, 74% yield, 96% ee). Chiral HPLC conditions: chiralcel OD-H, 25 °C, flow rate: 1.0 mL/min, hexane/ isopropanol: 80/20, 254 nm, 6.6 min (*S*), 8.2 min (*R*);  $[\alpha]_D^{25} = -6.1^\circ$  ( $c = 0.23$ ,  $\text{CHCl}_3$ );  $^1\text{H}$  NMR (400 MHz,  $\text{CHloroform-}d$ )  $\delta$  7.99 (d,  $J = 8.2$  Hz, 1H), 7.83 (d,  $J = 8.0$  Hz, 1H), 7.58 - 7.51 (m, 2H), 7.48 - 7.43 (m, 1H), 7.37 - 7.33 (m, 1H), 6.94 - 6.82 (m, 2H), 3.84 (s, 1H), 3.78 (s, 3H), 2.12 (s, 3H);  $^{13}\text{C}$  NMR (101 MHz,  $\text{CDCl}_3$ )  $\delta$  179.2, 159.1, 152.8, 137.2, 135.7, 126.8, 126.0, 125.0, 123.1, 121.7, 113.7, 76.2, 55.3, 30.3; IR (KBr,  $\text{cm}^{-1}$ ): 3242, 2985, 2966, 2845, 1609, 1547, 1455, 1310, 1254, 1178, 1029, 917, 834, 763, 732; HRMS (ESI):  $m/z$  calcd. for  $[\text{M}+\text{H}, \text{C}_{16}\text{H}_{16}\text{NO}_2\text{S}]^+$ : 286.0896; found: 286.0901.

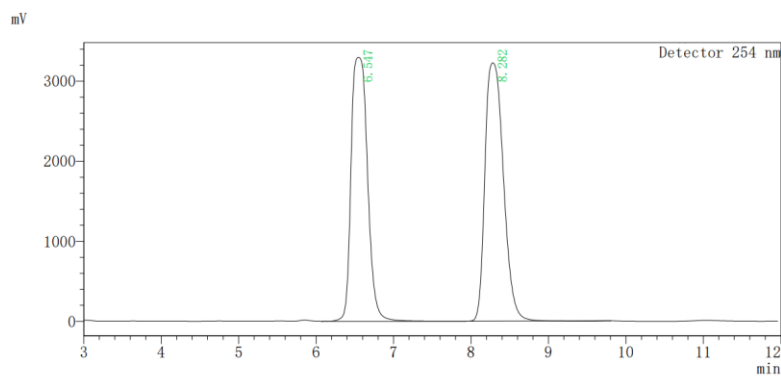

| No.   | Ret. Time (min) | Height  | Height% | Area      | Area%   |
|-------|-----------------|---------|---------|-----------|---------|
| 1     | 6.547           | 3296478 | 50.542  | 48560549  | 47.731  |
| 2     | 8.282           | 3225745 | 49.458  | 53176515  | 52.269  |
| Total |                 | 6522223 | 100.000 | 101737064 | 100.000 |

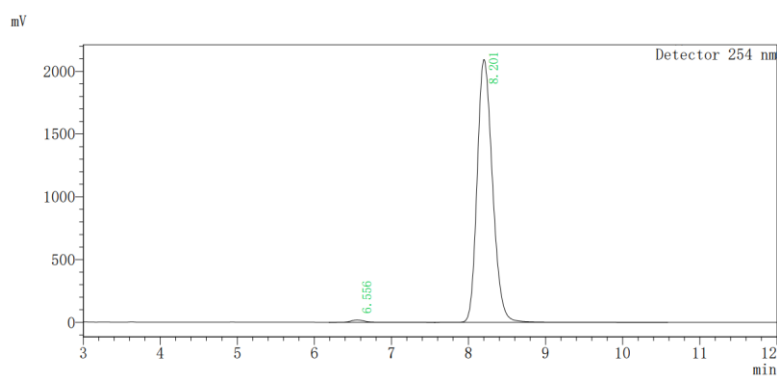

| No.   | Ret. Time (min) | Height  | Height% | Area     | Area%   |
|-------|-----------------|---------|---------|----------|---------|
| 1     | 6.556           | 18668   | 0.884   | 242823   | 0.833   |
| 2     | 8.201           | 2094331 | 99.116  | 28916431 | 99.167  |
| Total |                 | 2112999 | 100.000 | 29159253 | 100.000 |

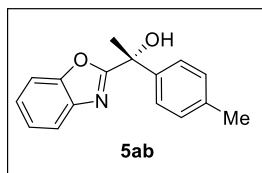

**(*R*)-1-(benzo[d]oxazol-2-yl)-1-(*p*-tolyl)ethan-1-ol (5ab):**

General Procedure B was followed using **4a** (32.2 mg, 0.20 mmol) and *p*-tolylboronic acid (68.0 mg, 0.50 mmol). After flash chromatography with petroleum ether/ethyl acetate (10/1, v/v), the desired product was obtained as a colorless oil (28.4 mg, 56% yield, 96% ee). Chiral HPLC conditions: chiralcel OD-H, 25 °C, flow rate: 1.0 mL/min, hexane/isopropanol: 80/20, 254 nm, 4.7 min (*S*), 5.2 min (*R*);  $[\alpha]_D^{25} = 62.4^\circ$  ( $c = 1.39$ ,  $\text{CHCl}_3$ );  $^1\text{H}$  NMR (400 MHz,  $\text{CHCl}_3$ )  $\delta$  7.74 - 7.67 (m, 1H), 7.51 - 7.43 (m, 3H), 7.36 - 7.28 (m, 2H), 7.17 - 7.15 (m, 2H), 4.32 (br.s, 1H), 2.34 (s, 3H), 2.12 (s, 3H);  $^{13}\text{C}$  NMR (101 MHz,  $\text{CDCl}_3$ )  $\delta$  169.5, 150.9, 140.8, 140.3, 137.5, 129.0, 125.1, 124.9, 124.4, 120.1, 110.7, 73.5, 28.5, 20.9; IR (KBr,  $\text{cm}^{-1}$ ): 3391, 3027, 2988, 2924, 1611, 1561, 1511, 1455, 1241, 1105, 1082, 929, 818, 748; HRMS (ESI):  $m/z$  calcd. for  $[\text{M}+\text{H}, \text{C}_{16}\text{H}_{16}\text{NO}_2]^+$ : 254.1176; found: 254.1182.

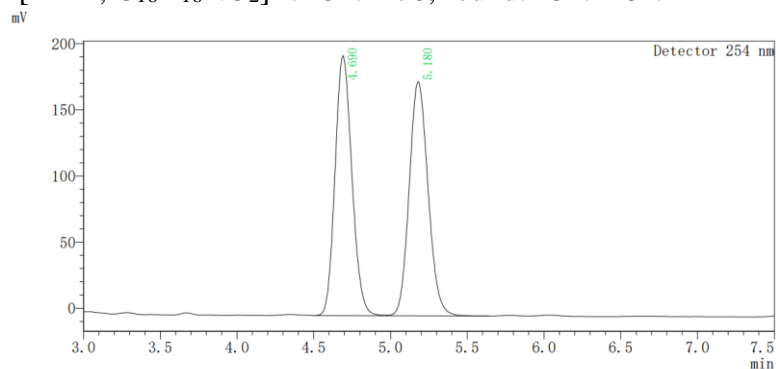

| No.   | Ret. Time (min) | Height | Height% | Area    | Area%   |
|-------|-----------------|--------|---------|---------|---------|
| 1     | 4.690           | 196626 | 52.636  | 1506583 | 49.871  |
| 2     | 5.180           | 176928 | 47.364  | 1514350 | 50.129  |
| Total |                 | 373554 | 100.000 | 3020933 | 100.000 |

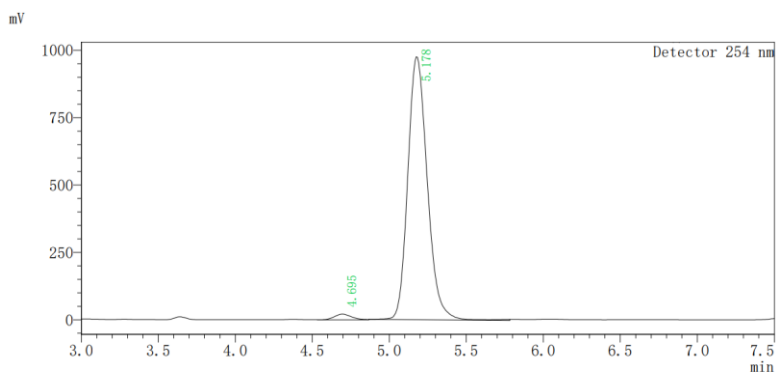

| No.   | Ret. Time (min) | Height | Height% | Area    | Area%   |
|-------|-----------------|--------|---------|---------|---------|
| 1     | 4.695           | 21063  | 2.114   | 168304  | 1.917   |
| 2     | 5.178           | 975276 | 97.886  | 8609005 | 98.083  |
| Total |                 | 996339 | 100.000 | 8777309 | 100.000 |

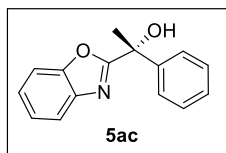

**(*R*)-1-(benzo[d]oxazol-2-yl)-1-phenylethan-1-ol (**5ac**):**

General Procedure B was followed using **4a** (32.2 mg, 0.20 mmol) and phenylboronic acid (61.0 mg, 0.50 mmol). After flash chromatography with petroleum ether/ethyl acetate (10/1, v/v), the desired product was obtained as a colorless oil (43.3 mg, 90% yield, 98% ee). The absolute configuration was determined based on **6c**. Chiral HPLC conditions: chiralcel OD-H, 25 °C, flow rate: 1.0 mL/min, hexane/isopropanol: 80/20, 254 nm, 5.0 min (*S*), 5.5 min (*R*);  $[\alpha]_D^{25} = 77.6^\circ$  ( $c = 0.65$ ,  $\text{CHCl}_3$ );  $^1\text{H}$  NMR (400 MHz,  $\text{CHloroform-}d$ )  $\delta$  7.74 - 7.66 (m, 1H), 7.61 - 7.53 (m, 2H), 7.51 - 7.43 (m, 1H), 7.40 - 7.26 (m, 5H), 4.10 (br.s, 1H), 2.11 (s, 3H);  $^{13}\text{C}$  NMR (101 MHz,  $\text{CDCl}_3$ )  $\delta$  169.4, 151.0, 143.7, 140.3, 128.4, 127.8, 125.2, 125.0, 124.5, 120.1, 110.8, 73.6, 28.6; HRMS (ESI):  $m/z$  calcd. for  $[\text{M}+\text{H}, \text{C}_{15}\text{H}_{14}\text{NO}_2]^+$ : 240.1019; found: 240.1024.

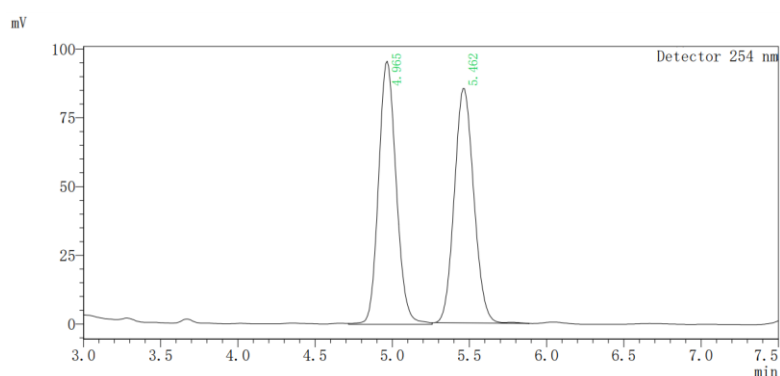

| No.   | Ret. Time (min) | Height | Height% | Area    | Area%   |
|-------|-----------------|--------|---------|---------|---------|
| 1     | 4.965           | 95667  | 52.875  | 762163  | 50.437  |
| 2     | 5.462           | 85265  | 47.125  | 748960  | 49.563  |
| Total |                 | 180931 | 100.000 | 1511123 | 100.000 |

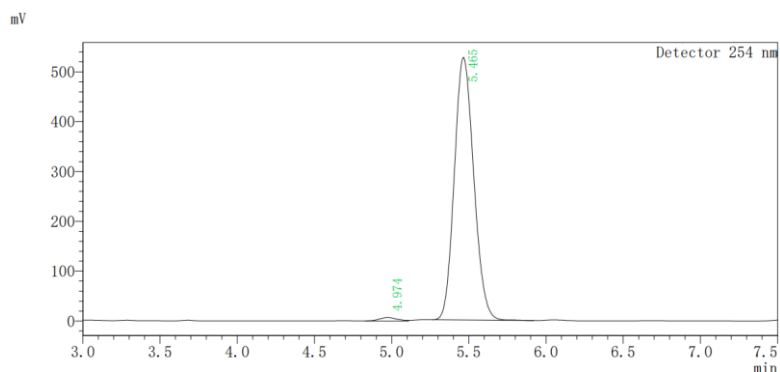

| No.   | Ret. Time (min) | Height | Height% | Area    | Area%   |
|-------|-----------------|--------|---------|---------|---------|
| 1     | 4.974           | 6956   | 1.302   | 57017   | 1.219   |
| 2     | 5.465           | 527241 | 98.698  | 4621324 | 98.781  |
| Total |                 | 534197 | 100.000 | 4678341 | 100.000 |

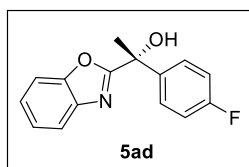

**(R)-1-(benzo[d]oxazol-2-yl)-1-(4-fluorophenyl)ethan-1-ol**

**(5ad):** General Procedure B was followed using **4a** (32.2 mg, 0.20 mmol) and (4-fluorophenyl)boronic acid (70.0 mg, 0.50 mmol). After flash chromatography with petroleum ether/ethyl acetate (8/1, v/v), the desired product was obtained as a

colorless oil (45.4 mg, 88% yield, 97% ee). Chiral HPLC conditions: chiralcel OD-H, 25 °C, flow rate: 1.0 mL/min, hexane/ isopropanol: 80/20, 254 nm, 4.6 min (*S*), 5.0 min (*R*);  $[\alpha]_D^{25} = 62.5^\circ$  ( $c = 1.66$ ,  $\text{CHCl}_3$ );  $^1\text{H}$  NMR (400 MHz,  $\text{CHloroform-}d$ )  $\delta$  7.74 - 7.69 (m, 1H), 7.58 - 7.45 (m, 3H), 7.39 - 7.30 (m, 2H), 7.06 - 7.00 (m, 2H), 4.06 (br.s, 1H), 2.07 (s, 3H);  $^{13}\text{C}$  NMR (101 MHz,  $\text{CHloroform-}d$ )  $\delta$  169.1, 162.3 (d,  $J = 246.8$  Hz), 151.1, 140.3, 139.5, 127.0 (d,  $J = 8.3$  Hz), 125.4, 124.7, 120.2, 115.3 (d,  $J = 21.6$  Hz), 110.9, 73.2, 28.8; IR (KBr,  $\text{cm}^{-1}$ ): 3417, 3074, 2990, 2934, 1603, 1562, 1508, 1454, 1239, 1161, 1095, 928, 835, 748; HRMS (ESI):  $m/z$  calcd. for  $[\text{M}+\text{H}, \text{C}_{15}\text{H}_{13}\text{FNO}_2]^+$ : 258.0925; found: 258.0929.

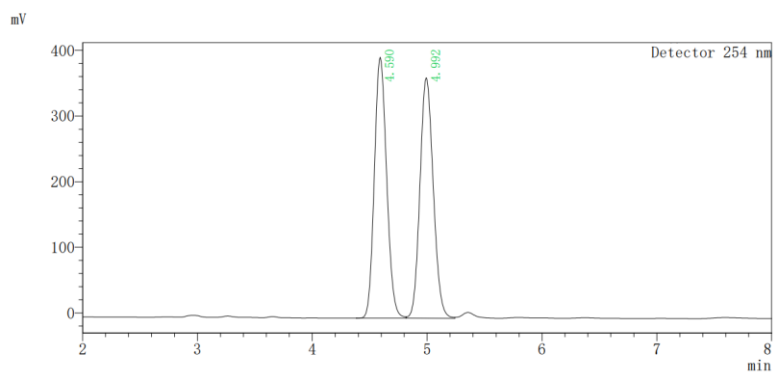

| No.   | Ret. Time (min) | Height | Height% | Area    | Area%   |
|-------|-----------------|--------|---------|---------|---------|
| 1     | 4.590           | 397525 | 52.026  | 2958098 | 49.990  |
| 2     | 4.992           | 366558 | 47.974  | 2959286 | 50.010  |
| Total |                 | 764084 | 100.000 | 5917384 | 100.000 |

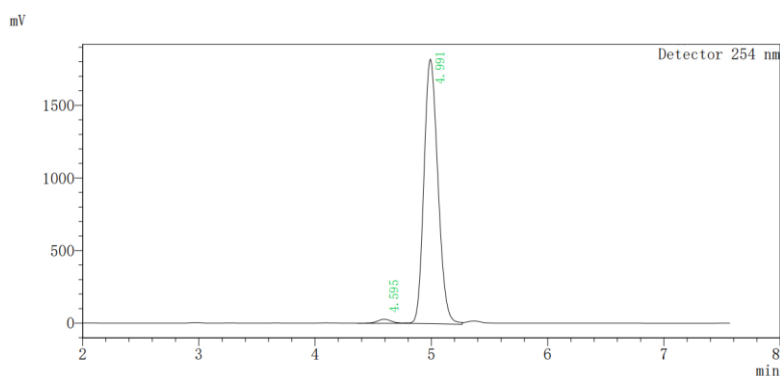

| No.   | Ret. Time (min) | Height  | Height% | Area     | Area%   |
|-------|-----------------|---------|---------|----------|---------|
| 1     | 4.595           | 27605   | 1.492   | 237564   | 1.533   |
| 2     | 4.991           | 1822222 | 98.508  | 15254568 | 98.467  |
| Total |                 | 1849827 | 100.000 | 15492132 | 100.000 |

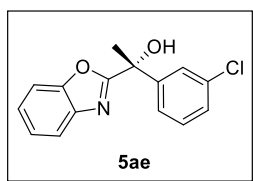

**(*R*)-1-(benzo[d]oxazol-2-yl)-1-(3-chlorophenyl)ethan-1-ol**

**(5ae):** General Procedure B was followed using **4a** (32.2 mg, 0.20 mmol) and (3-chlorophenyl)boronic acid (78.0 mg, 0.50 mmol). After flash chromatography with petroleum ether/ethyl acetate (8/1, v/v), the desired product was obtained as a colorless solid (37.8 mg, 69% yield, 95% ee). Chiral HPLC conditions: chiralcel OD-H, 25 °C, flow rate: 1.0 mL/min, hexane/isopropanol: 80/20, 254 nm, 4.6 min (*S*), 5.0 min (*R*);  $[\alpha]_D^{25} = 80.5^\circ$  ( $c = 1.06$ ,  $\text{CHCl}_3$ );  $^1\text{H}$  NMR (400 MHz,  $\text{CHloroform-}d$ )  $\delta$  7.67 - 7.62 (m, 1H), 7.53 - 7.52 (m, 1H), 7.45 - 7.40 (m, 1H), 7.37 - 7.32 (m, 1H), 7.29 - 7.25 (m, 2H), 7.22 - 7.16 (m, 2H), 3.63 (br.s, 1H), 1.99 (s, 3H);  $^{13}\text{C}$  NMR (101 MHz,  $\text{CDCl}_3$ )  $\delta$  168.6, 151.1, 145.7, 140.2, 134.5, 129.8, 128.1, 125.4, 125.4, 124.7, 123.3, 120.3, 111.0, 73.2, 28.7; IR (KBr,  $\text{cm}^{-1}$ ): 3325, 3078, 2991, 2925, 1595, 1564, 1454, 1241, 1138, 1082, 933, 798, 740; HRMS (ESI):  $m/z$  calcd. for  $[\text{M}+\text{H}, \text{C}_{15}\text{H}_{13}\text{ClNO}_2]^+$ : 274.0629; found: 274.0634.

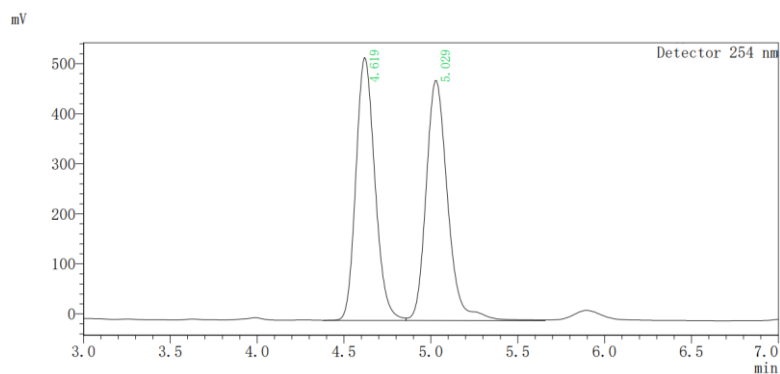

| No.   | Ret. Time (min) | Height  | Height% | Area    | Area%   |
|-------|-----------------|---------|---------|---------|---------|
| 1     | 4.619           | 525265  | 52.276  | 3989458 | 49.132  |
| 2     | 5.029           | 479532  | 47.724  | 4130345 | 50.868  |
| Total |                 | 1004797 | 100.000 | 8119803 | 100.000 |

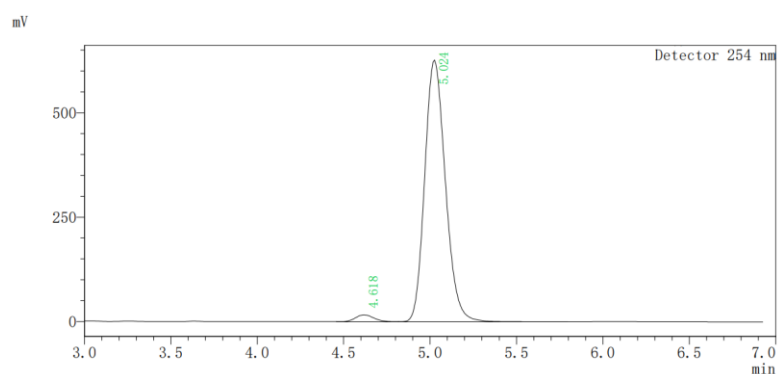

| No.   | Ret. Time (min) | Height | Height% | Area    | Area%   |
|-------|-----------------|--------|---------|---------|---------|
| 1     | 4.618           | 16951  | 2.634   | 128092  | 2.399   |
| 2     | 5.024           | 626605 | 97.366  | 5211053 | 97.601  |
| Total |                 | 643556 | 100.000 | 5339146 | 100.000 |

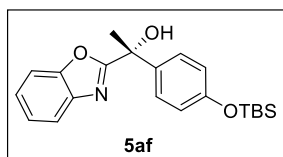

**(*R*)-1-(benzo[d]oxazol-2-yl)-1-(4-((tert-butyldimethylsilyl)oxy)phenyl)ethan-1-ol (5af):** General Procedure B was followed using **4a** (32.2 mg, 0.20 mmol) and (4-((tert-butyldimethylsilyl)oxy)phenyl) boronic acid (126.2 mg, 0.50 mmol). After flash chromatography with petroleum ether/ethyl acetate (10/1, v/v), the desired product was obtained as a colorless oil (66.7 mg, 90% yield, 98% ee). Chiral HPLC conditions: chiralcel OD-H, 25 °C, flow rate: 1.0 mL/min, hexane/isopropanol: 95/5, 254 nm, 5.9 min (*S*), 6.7 min (*R*);  $[\alpha]_D^{25} = 42.5^\circ$  ( $c = 3.36$ ,  $\text{CHCl}_3$ );  $^1\text{H}$  NMR (400 MHz,  $\text{CHloroform-}d$ )  $\delta$  7.80 - 7.66 (m, 1H), 7.53 - 7.44 (m, 1H), 7.44 - 7.35 (m, 2H), 7.35 - 7.28 (m, 2H), 6.86 - 6.76 (m, 2H), 4.18 (br.s, 0.87H), 2.07 (s, 3H), 0.98 (s, 9H), 0.18 (s, 6H);  $^{13}\text{C}$  NMR (101 MHz,  $\text{CDCl}_3$ )  $\delta$  169.7, 155.3, 151.0, 140.4, 136.4, 126.3, 125.1, 124.5, 120.1, 119.8, 110.8, 73.4, 28.6, 25.6, 18.1, -4.5; IR (KBr,  $\text{cm}^{-1}$ ): 3349, 2956, 2930, 2858, 1607, 1509, 1455, 1362, 1267, 1173, 916, 839, 779, 741; HRMS (ESI):  $m/z$  calcd. for  $[\text{M}+\text{H}, \text{C}_{21}\text{H}_{28}\text{NO}_3\text{Si}]^+$ : 370.1833; found: 370.1839.

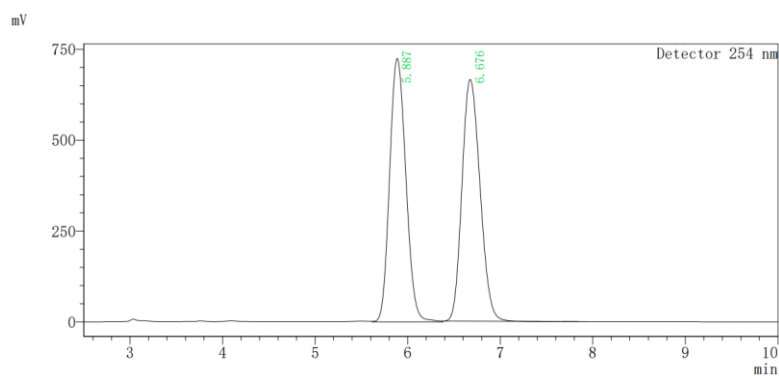

| No.   | Ret. Time (min) | Height  | Height% | Area     | Area%   |
|-------|-----------------|---------|---------|----------|---------|
| 1     | 5.887           | 724429  | 52.133  | 8866236  | 49.509  |
| 2     | 6.676           | 665161  | 47.867  | 9041986  | 50.491  |
| Total |                 | 1389590 | 100.000 | 17908222 | 100.000 |

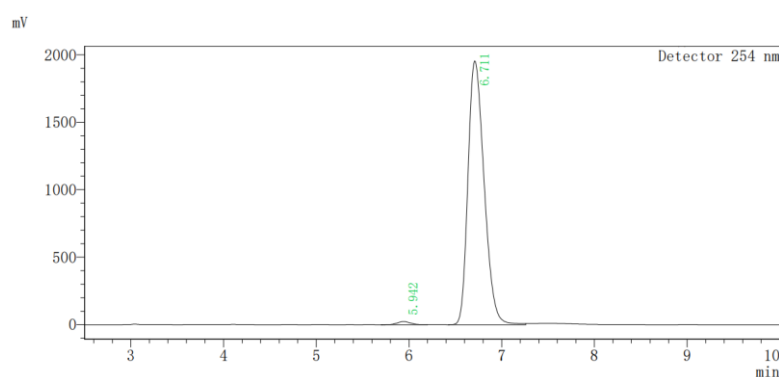

| No.   | Ret. Time (min) | Height  | Height% | Area     | Area%   |
|-------|-----------------|---------|---------|----------|---------|
| 1     | 5.942           | 22864   | 1.157   | 225738   | 0.944   |
| 2     | 6.711           | 1954081 | 98.843  | 23679400 | 99.056  |
| Total |                 | 1976945 | 100.000 | 23905138 | 100.000 |

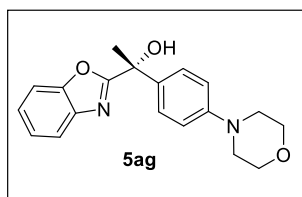

**(R)-1-(benzo[d]oxazol-2-yl)-1-(4-morpholinophenyl)ethan-1-ol (5ag):** General Procedure B was followed using **4a** (32.2 mg, 0.20 mmol) and (4-morpholinophenyl)boronic acid (103.6 mg, 0.50 mmol). After flash chromatography with petroleum ether/ethyl acetate (8/1, v/v), the desired product was obtained as a colorless oil (59.7 mg, 92% yield, 96% ee). Chiral HPLC conditions: chiralcel OD-H, 25 °C, flow rate: 1.0 mL/min, hexane/ isopropanol: 95/5, 254 nm, 13.0 min (*S*), 14.3 min (*R*);  $[\alpha]_D^{25} = 41.3^\circ$  ( $c = 1.43$ ,  $\text{CHCl}_3$ );  $^1\text{H}$  NMR (400 MHz,  $\text{CHloroform-}d$ )  $\delta$  7.75 - 7.66 (m, 1H), 7.52 - 7.39 (m, 3H), 7.37 - 7.26 (m, 2H), 6.93 - 6.76 (m, 2H), 3.93 (br.s, 1H), 3.95 - 3.58 (m, 4H), 3.25 - 2.83 (m, 4H), 2.07 (s, 3H);  $^{13}\text{C}$  NMR (101 MHz,  $\text{CDCl}_3$ )  $\delta$  169.6, 151.0, 150.7, 140.4, 134.9, 126.0, 125.0, 124.4, 120.1, 115.2, 110.8, 73.2, 66.7, 48.9, 28.4; IR (KBr): 3390, 2963, 2855, 2824, 1610, 1514, 1453, 1377, 1238, 1119, 927, 825, 745; HRMS (ESI):  $m/z$  calcd. for  $[\text{M}+\text{H}, \text{C}_{19}\text{H}_{21}\text{N}_2\text{O}_3]^+$  : 325.1547; found: 325.1552.

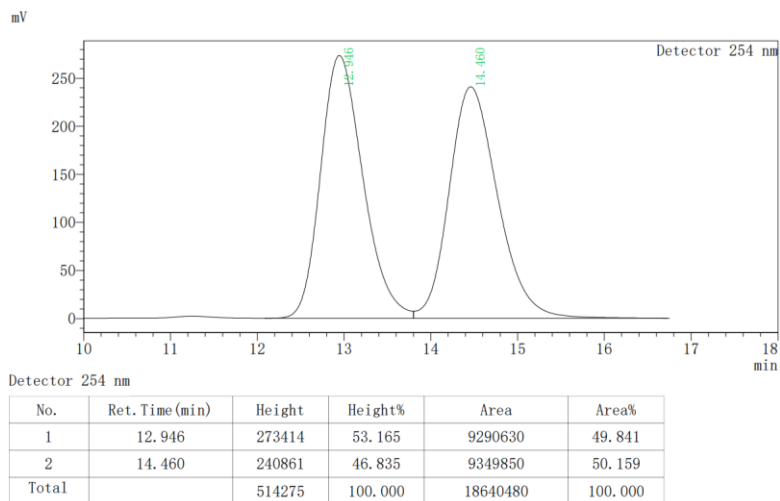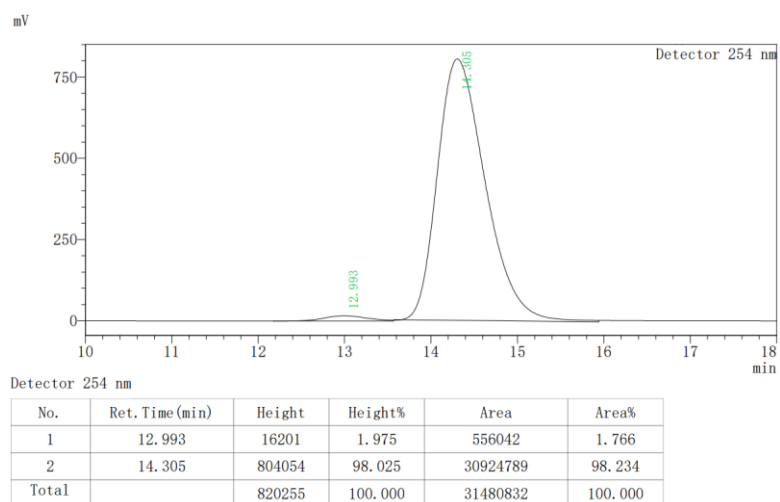

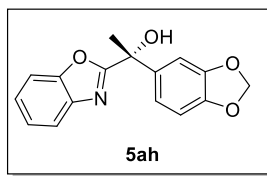

**(*R*)-1-(benzo[d][1,3]dioxol-5-yl)-1-(benzo[d]oxazol-2-yl)ethan-1-ol (5ah):** General Procedure B was followed using **4a** (32.2 mg, 0.20 mmol) and benzo[d][1,3]dioxol-5-ylboronic acid (83.0 mg, 0.50 mmol). After flash chromatography with petroleum ether/ethyl acetate (8/1, v/v), the desired product was obtained as a colorless oil (51.3 mg, 90% yield, 98% ee). Chiral HPLC conditions: chiralcel OD-H, 25 °C, flow rate: 1.0 mL/min, hexane/ isopropanol: 95/5, 254 nm, 17.0 min (*S*), 18.2 min (*R*);  $[\alpha]_D^{25} = 56.8^\circ$  ( $c = 2.29$ ,  $\text{CHCl}_3$ );  $^1\text{H}$  NMR (400 MHz,  $\text{Chloroform-}d$ )  $\delta$  7.76 - 7.67 (m, 1H), 7.54 - 7.43 (m, 1H), 7.38 - 7.29 (m, 2H), 7.07 - 7.06 (m, 1H), 7.01 - 6.98 (m, 1H), 6.76 - 6.74 (m, 1H), 5.93 (s, 2H), 3.66 (br.s, 1H), 2.05 (s, 3H);  $^{13}\text{C}$  NMR (101 MHz,  $\text{CDCl}_3$ )  $\delta$  169.3, 151.0, 147.8, 147.2, 140.3, 137.8, 125.2, 124.6, 120.2, 118.4, 110.9, 108.0, 106.1, 101.2, 73.4, 28.7; IR (KBr,  $\text{cm}^{-1}$ ): 3375, 3078, 2988, 2894, 1609, 1562, 1487, 1454, 1242, 1100, 1040, 934, 814, 749; HRMS (ESI):  $m/z$  calcd. for  $[\text{M}+\text{H}, \text{C}_{16}\text{H}_{14}\text{NO}_4]^+$ : 284.0917; found: 284.0920.

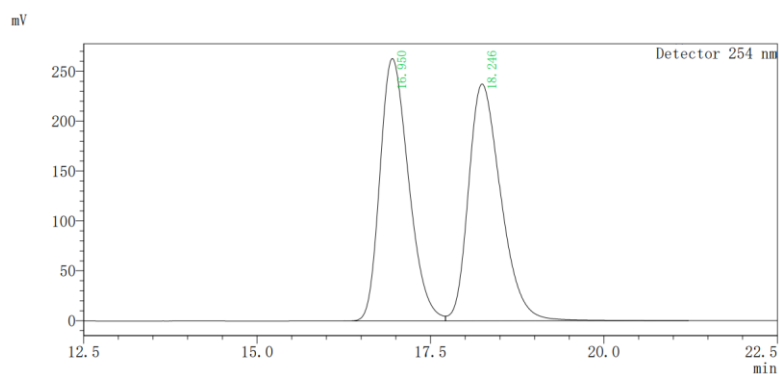

| No.   | Ret. Time (min) | Height | Height% | Area     | Area%   |
|-------|-----------------|--------|---------|----------|---------|
| 1     | 16.950          | 263106 | 52.571  | 7574827  | 49.550  |
| 2     | 18.246          | 237368 | 47.429  | 7712536  | 50.450  |
| Total |                 | 500474 | 100.000 | 15287363 | 100.000 |

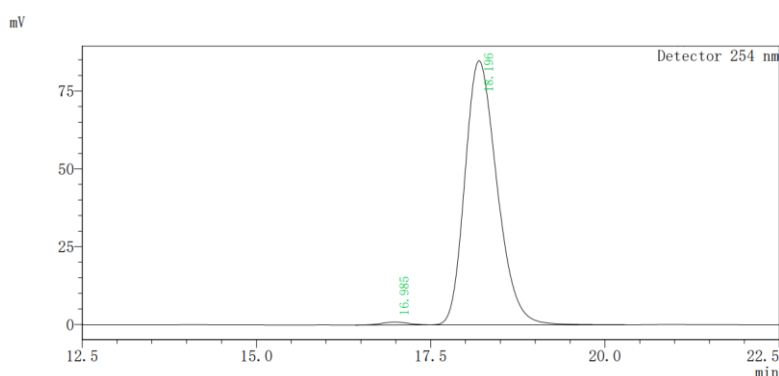

| No.   | Ret. Time (min) | Height | Height% | Area    | Area%   |
|-------|-----------------|--------|---------|---------|---------|
| 1     | 16.985          | 948    | 1.105   | 25818   | 0.939   |
| 2     | 18.196          | 84811  | 98.895  | 2723094 | 99.061  |
| Total |                 | 85759  | 100.000 | 2748912 | 100.000 |

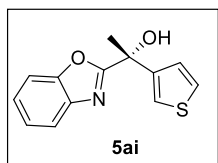

**(*R*)-1-(benzo[d]oxazol-2-yl)-1-(thiophen-3-yl)ethan-1-ol (5ai):**

General Procedure B was followed using **4a** (32.2 mg, 0.20 mmol) and thiophen-3-ylboronic acid (76.8 mg, 0.60 mmol). After flash chromatography with petroleum ether/ethyl acetate (8/1, v/v), the desired product was obtained as a colorless solid (40.0 mg, 81% yield, 95% ee). Chiral HPLC conditions: chiralcel OD-H, 25 °C, flow rate: 1.0 mL/min, hexane/isopropanol: 90/10, 254 nm, 8.0 min (*S*), 9.0 min (*R*);  $[\alpha]_D^{25} = 27.3^\circ$  ( $c = 0.42$ ,  $\text{CHCl}_3$ );  $^1\text{H}$  NMR (400 MHz,  $\text{CHCl}_3$ )  $\delta$  7.75 - 7.68 (m, 1H), 7.56 - 7.47 (m, 1H), 7.38 - 7.31 (m, 3H), 7.30 - 7.28 (m, 1H), 7.22 - 7.20 (m, 1H), 3.43 (br.s, 1H), 2.09 (s, 3H);  $^{13}\text{C}$  NMR (101 MHz,  $\text{CDCl}_3$ )  $\delta$  169.1, 151.1, 145.2, 140.4, 126.3, 125.7, 125.2, 124.6, 121.3, 120.2, 110.8, 71.9, 28.4; IR (KBr,  $\text{cm}^{-1}$ ): 3392, 3091, 3024, 2961, 1604, 1533, 1350, 1300, 1120, 1099, 968, 892, 768, 754; HRMS (ESI):  $m/z$  calcd. for  $[\text{M}+\text{H}, \text{C}_{13}\text{H}_{12}\text{NO}_2\text{S}]^+$ : 246.0583; found: 246.0586.

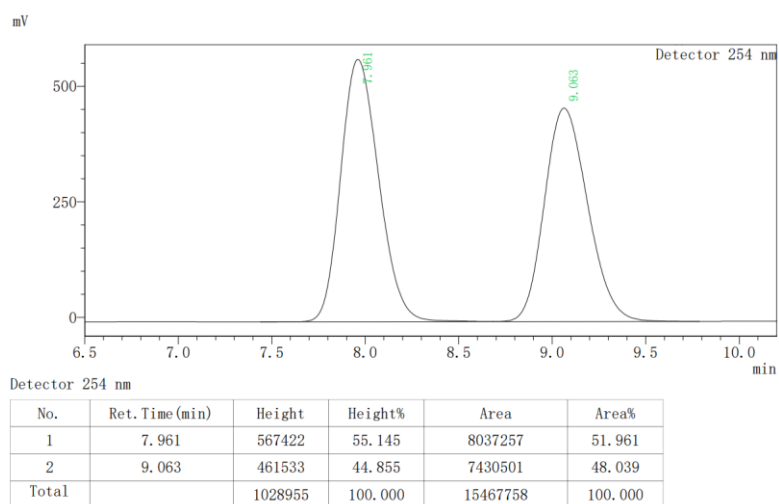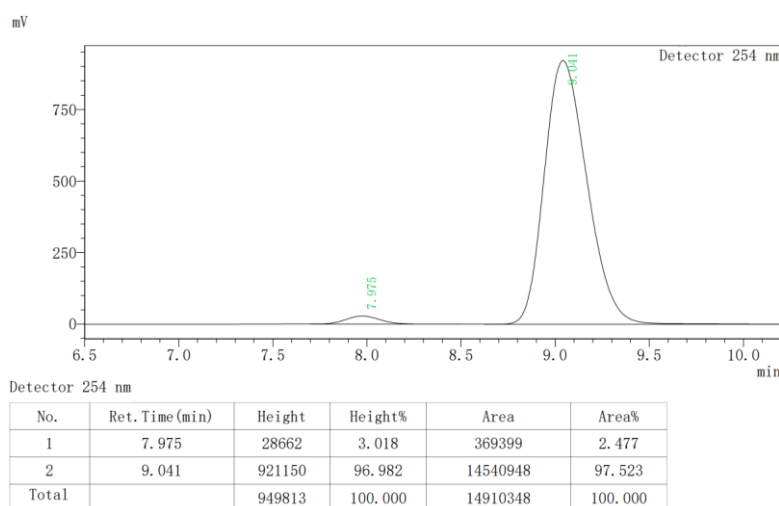

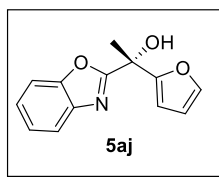

**(*R*)-1-(benzo[d]oxazol-2-yl)-1-(furan-2-yl)ethan-1-ol (5aj):**

General Procedure B was followed using **4a** (32.2 mg, 0.20 mmol) and furan-2-ylboronic acid (78.4 mg, 0.70 mmol). After flash chromatography with petroleum ether/ethyl acetate (8/1, v/v), the desired product was obtained as a colorless solid (34.6 mg, 75% yield, 80% ee). Chiral HPLC conditions: chiralcel OD-H, 25 °C, flow rate: 1.0 mL/min, hexane/isopropanol: 90/10, 230 nm, 8.5 min (*S*), 9.2 min (*R*);  $[\alpha]_D^{25} = 3.0^\circ$  ( $c = 1.13$ ,  $\text{CHCl}_3$ );  $^1\text{H}$  NMR (400 MHz,  $\text{CHloroform-}d$ )  $\delta$  7.77 - 7.69 (m, 1H), 7.56 - 7.49 (m, 1H), 7.41 - 7.31 (m, 3H), 6.40 - 6.38 (m, 1H), 6.36 - 6.35 (m, 1H), 2.87 (br.s, 1H), 2.10 (s, 3H);  $^{13}\text{C}$  NMR (101 MHz,  $\text{CDCl}_3$ )  $\delta$  167.6, 154.9, 151.1, 142.7, 140.4, 125.3, 124.6, 120.3, 110.9, 110.4, 106.7, 69.7, 25.2; IR (KBr,  $\text{cm}^{-1}$ ): 3317, 2995, 2929, 2859, 1611, 1563, 1455, 1241, 1158, 1129, 1084, 940, 830, 744; HRMS (ESI):  $m/z$  calcd. for  $[\text{M}+\text{H}, \text{C}_{13}\text{H}_{12}\text{NO}_3]^+$  : 230.0812; found: 230.0816.

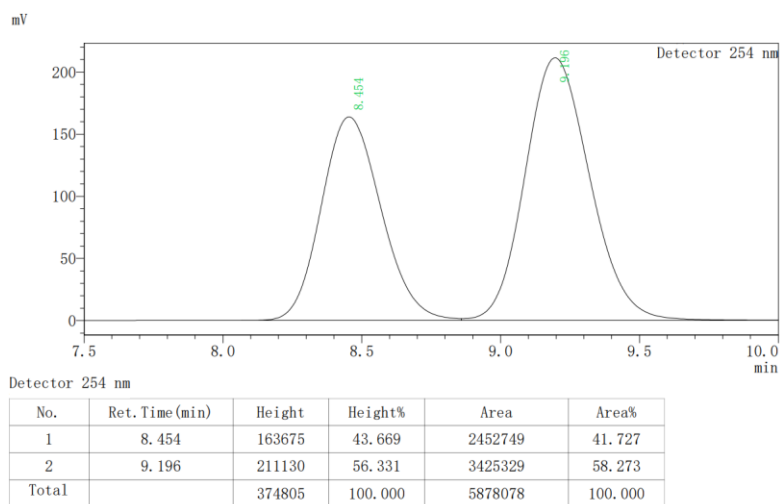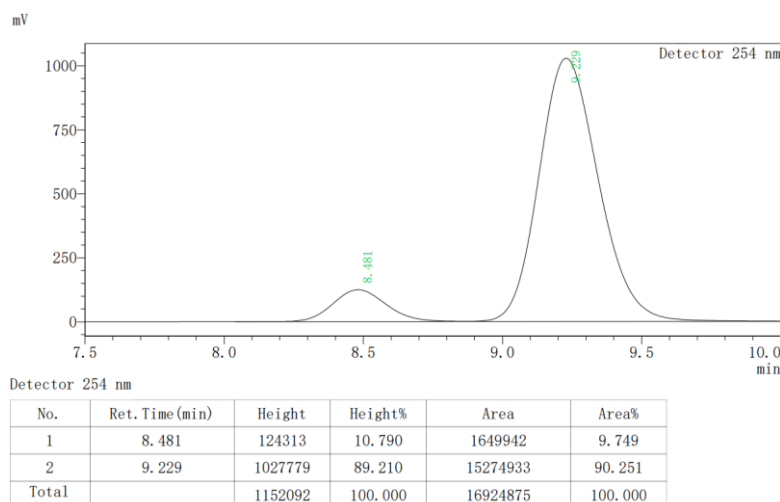

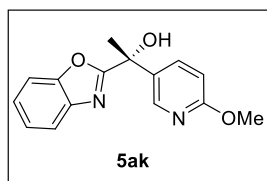

**(R)-1-(benzo[d]oxazol-2-yl)-1-(6-methoxypyridin-3-yl)ethan-1-ol (5ak):** General Procedure B was followed using **4a** (32.2 mg, 0.20 mmol) and (6-methoxypyridin-3-yl)boronic acid (76.5 mg, 0.50 mmol). After flash chromatography with petroleum ether/ethyl acetate (8/1, v/v), the desired product

was obtained as a colorless oil (47.2 mg, 87% yield, 93% ee). Chiral HPLC conditions: chiralcel AD-H, 25 °C, flow rate: 1.0 mL/min, hexane/isopropanol: 85/15, 254 nm, 8.0 min (*S*), 8.7 min (*R*);  $[\alpha]_D^{25} = 40.5^\circ$  ( $c = 2.2$ ,  $\text{CHCl}_3$ );  $^1\text{H}$  NMR (400 MHz,  $\text{CHloroform-}d$ )  $\delta$  8.33 (d,  $J = 2.6$  Hz, 1H), 7.79 - 7.76 (m, 1H), 7.70 - 7.63 (m, 1H), 7.48 - 7.44 (m, 1H), 7.33 - 7.29 (m, 2H), 6.70 (d,  $J = 8.7$  Hz, 1H), 4.59 (br.s, 0.82H), 3.89 (s, 3H), 2.07 (s, 3H);  $^{13}\text{C}$  NMR (101 MHz,  $\text{CDCl}_3$ )  $\delta$  168.9, 163.7, 151.0, 143.9, 140.2, 136.3, 132.2, 125.4, 124.7, 120.1, 110.8, 110.5, 72.1, 53.5, 28.5; IR (KBr,  $\text{cm}^{-1}$ ): 3332, 2991, 2947, 2848, 1607, 1493, 1455, 1381, 1289, 1123, 1083, 1024, 832, 748; HRMS (ESI):  $m/z$  calcd. for  $[\text{M}+\text{H}, \text{C}_{15}\text{H}_{15}\text{N}_2\text{O}_3]^+$  : 271.1077; found: 271.1074.

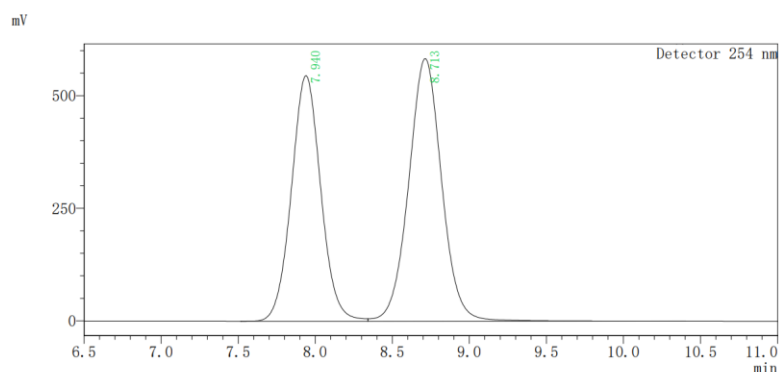

| No.   | Ret. Time (min) | Height  | Height% | Area     | Area%   |
|-------|-----------------|---------|---------|----------|---------|
| 1     | 7.940           | 545473  | 48.338  | 7236290  | 45.435  |
| 2     | 8.713           | 582992  | 51.662  | 8690374  | 54.565  |
| Total |                 | 1128466 | 100.000 | 15926663 | 100.000 |

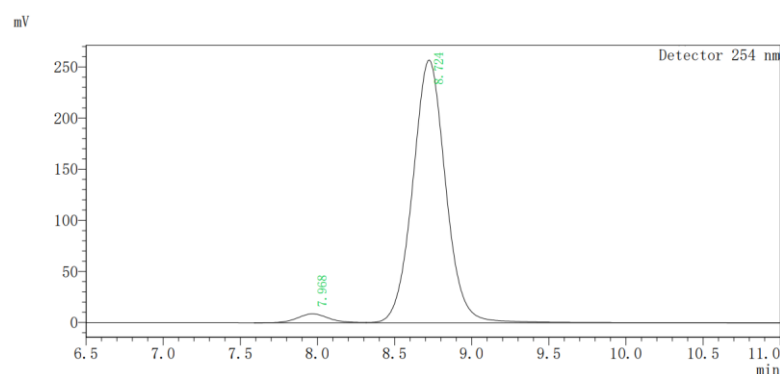

| No.   | Ret. Time (min) | Height | Height% | Area    | Area%   |
|-------|-----------------|--------|---------|---------|---------|
| 1     | 7.968           | 8769   | 3.299   | 122598  | 3.110   |
| 2     | 8.724           | 257015 | 96.701  | 3818968 | 96.890  |
| Total |                 | 265784 | 100.000 | 3941566 | 100.000 |

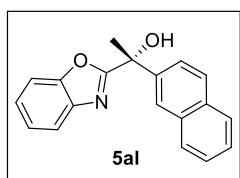

**(*R*)-1-(benzo[d]oxazol-2-yl)-1-(naphthalen-2-yl)ethan-1-ol**

**(5aI):** General Procedure B was followed using **4a** (32.2 mg, 0.20 mmol) and naphthalen-2-ylboronic acid (86.0 mg, 0.50 mmol). After flash chromatography with petroleum ether/ethyl acetate (8/1, v/v), the desired product was obtained as a colorless

solid (40.7 mg, 70% yield, 94% ee). Chiral HPLC conditions: chiralpak IA, 25 °C, flow rate: 1.0 mL/min, hexane/isopropanol: 85/15, 254 nm, 8.1 min (*S*), 8.7 min (*R*);  $[\alpha]_D^{25} = 90.6^\circ$  ( $c = 0.78$ ,  $\text{CHCl}_3$ );  $^1\text{H}$  NMR (400 MHz,  $\text{CHloroform-}d$ )  $\delta$  8.05 (s, 1H), 7.88 - 7.72 (m, 4H), 7.70 - 7.60 (m, 1H), 7.49 - 7.46 (m, 3H), 7.35 - 7.32 (m, 2H), 4.20 (br.s, 1H), 2.21 (s, 3H);  $^{13}\text{C}$  NMR (101 MHz,  $\text{CDCl}_3$ )  $\delta$  169.3, 151.1, 141.0, 140.4, 133.0, 132.8, 128.3, 127.5, 126.2, 125.2, 124.6, 123.7, 123.2, 120.2, 110.9, 73.8, 28.6; IR (KBr,  $\text{cm}^{-1}$ ): 3345, 3056, 2985, 2933, 2836, 1602, 1562, 1454, 1371, 1241, 1127, 1085, 931, 858, 818, 745; HRMS (ESI):  $m/z$  calcd. for  $[\text{M}+\text{H}, \text{C}_{19}\text{H}_{16}\text{NO}_2]^+$ : 290.1176; found: 290.1184.

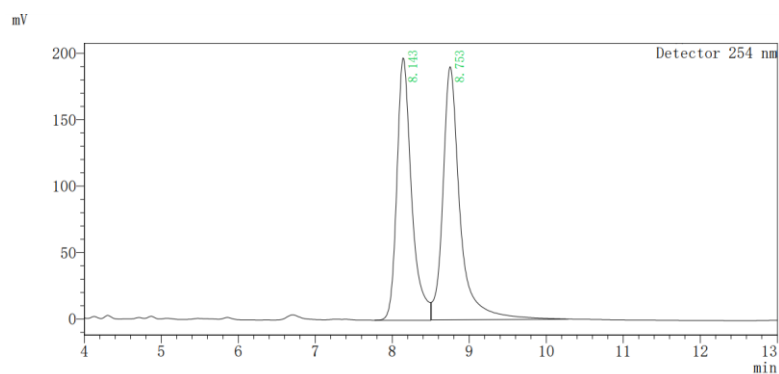

| No.   | Ret. Time (min) | Height | Height% | Area    | Area%   |
|-------|-----------------|--------|---------|---------|---------|
| 1     | 8.143           | 197368 | 50.887  | 2609957 | 46.979  |
| 2     | 8.753           | 190489 | 49.113  | 2945627 | 53.021  |
| Total |                 | 387857 | 100.000 | 5555583 | 100.000 |

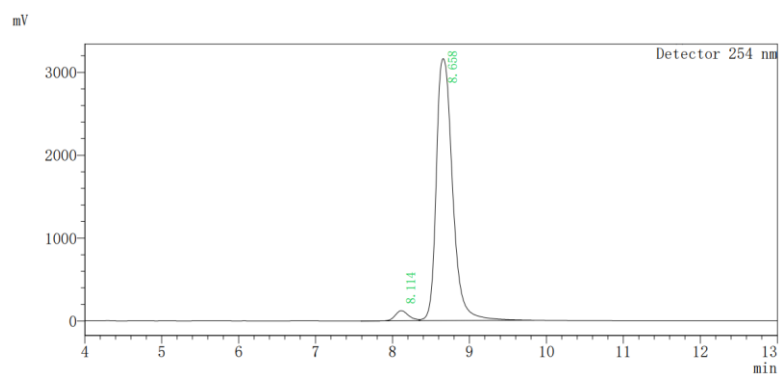

| No.   | Ret. Time (min) | Height  | Height% | Area     | Area%   |
|-------|-----------------|---------|---------|----------|---------|
| 1     | 8.114           | 122089  | 3.719   | 1489588  | 3.107   |
| 2     | 8.658           | 3161188 | 96.281  | 46449730 | 96.893  |
| Total |                 | 3283277 | 100.000 | 47939319 | 100.000 |

## **7. General procedure of hydrolysis of chiral tertiary alcohol for synthesis of chiral $\alpha$ -Hydroxy Acids (General Procedure C).**

To a Schlenk tube was added **5aa** (103.7 mg, 0.39 mmol, 1.0 equiv), KOH (480.3 mg, 7.71 mmol, 20 equiv, 90 wt%), and glycol (3.9 mL). The resulting mixture was stirred at 150 °C under nitrogen for 16 h. Then cooled to room temperature, ether (6 mL) was added to the mixture. Reaction mixture pH was adjusted to 1 by adding aqueous HCl (~2.6 mL, 3M ) at -15 °C. The mixture was added water (6 mL) and extracted with ether (10-20 mL x 3), the combined organic phase was washed with water (20 mL), and brine (15 mL), dried over sodium sulfate, filtered, and concentrated to provide the desired product with high purity. The enantiomeric excesses were determined by chiral HPLC on a chiralpak AS-H or chiralcel AD-H column.

## 8. Analytical data of chiral $\alpha$ -Hydroxy Acids

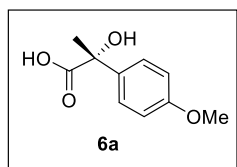

### **(*R*)-2-hydroxy-2-(4-methoxyphenyl)propanoic acid (6a):**

General Procedure C was followed using **5aa** (103.7 mg, 0.39 mmol). After extraction, the desired product was obtained as solid (68.3 mg, 89% yield, 97% ee). Chiral HPLC conditions: chiralpak AS-H, 25 °C, flow rate: 1.0 mL/min, hexane/isopropanol /trifluoroacetic acid: 80/20/0.1, 230 nm, 7.7 min (*S*), 8.9 min (*R*);  $[\alpha]_D^{25} = -27.0^\circ$  ( $c = 0.2$ ,  $\text{CHCl}_3$ );  $^1\text{H}$  NMR (400 MHz,  $\text{DMSO}-d_6$ )  $\delta$  12.56 (br.s, 1H), 7.43 - 7.41 (m, 2H), 6.89 - 6.87 (m, 2H), 5.67 (br.s, 1H), 3.73 (s, 3H), 1.59 (s, 3H);  $^{13}\text{C}$  NMR (101 MHz,  $\text{DMSO}$ )  $\delta$  176.8, 158.8, 136.9, 126.9, 113.7, 74.9, 55.5, 27.8; HRMS (ESI):  $m/z$  calcd. for  $[\text{M}+2\text{Na}-\text{H}, \text{C}_{10}\text{H}_{11}\text{Na}_2\text{O}_4]^+$  : 241.0447; found: 241.0453.

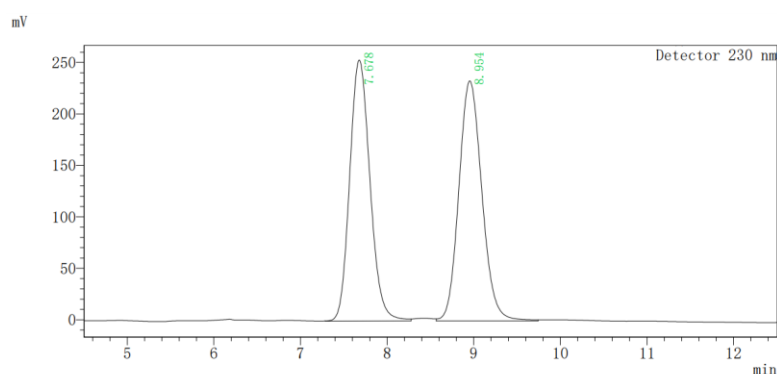

| No.   | Ret. Time (min) | Height | Height% | Area    | Area%   |
|-------|-----------------|--------|---------|---------|---------|
| 1     | 7.678           | 253547 | 52.084  | 4135369 | 48.924  |
| 2     | 8.954           | 233260 | 47.916  | 4317325 | 51.076  |
| Total |                 | 486807 | 100.000 | 8452694 | 100.000 |

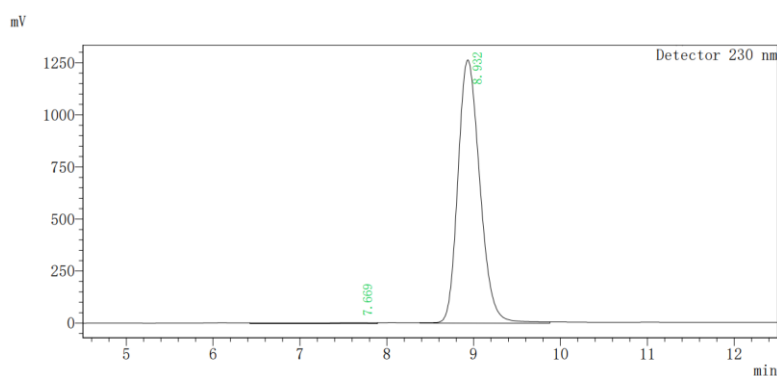

| No.   | Ret. Time (min) | Height  | Height% | Area     | Area%   |
|-------|-----------------|---------|---------|----------|---------|
| 1     | 7.669           | 5472    | 0.431   | 349742   | 1.548   |
| 2     | 8.932           | 1263580 | 99.569  | 22236964 | 98.452  |
| Total |                 | 1269052 | 100.000 | 22586706 | 100.000 |

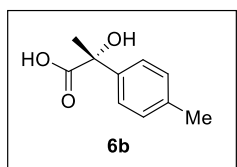

**(R)-2-hydroxy-2-(p-tolyl)propanoic acid (6b):** General Procedure C was followed using **5ab** (92.4 mg, 0.36 mmol). After extraction, the desired product was obtained as solid (58.6 mg, 90% yield, 96% ee). Chiral HPLC conditions: chiralpak AS-H, 25 °C, flow rate: 1.0 mL/min, hexane/isopropanol/trifluoroacetic acid: 85/15/0.1, 230 nm, 6.7 min (*S*), 7.7 min (*R*);  $[\alpha]_D^{25} = -16.7^\circ$  ( $c = 0.66$ ,  $\text{CHCl}_3$ );  $^1\text{H}$  NMR (400 MHz,  $\text{DMSO}-d_6$ )  $\delta$  12.60 (br.s, 1H), 7.39 - 7.37 (m, 2H), 7.14 - 7.12 (m, 2H), 5.68 (br.s, 1H), 2.27 (s, 3H), 1.58 (s, 3H);  $^{13}\text{C}$  NMR (101 MHz,  $\text{DMSO}$ )  $\delta$  176.7, 141.9, 136.6, 128.9, 125.6, 75.2, 27.8, 21.1; HRMS (ESI):  $m/z$  calcd. for  $[\text{M}+2\text{Na}-\text{H}, \text{C}_{10}\text{H}_{11}\text{Na}_2\text{O}_3]^+$ : 225.0498; found: 225.0501.

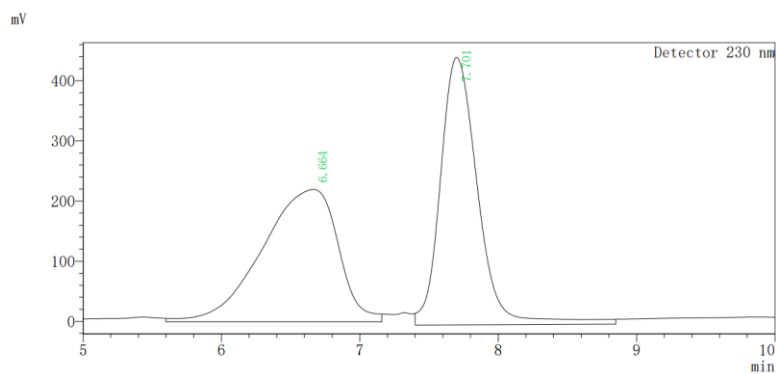

| No.   | Ret. Time (min) | Height | Height% | Area     | Area%   |
|-------|-----------------|--------|---------|----------|---------|
| 1     | 6.664           | 220057 | 33.101  | 8412979  | 50.076  |
| 2     | 7.701           | 444751 | 66.899  | 8387514  | 49.924  |
| Total |                 | 664809 | 100.000 | 16800494 | 100.000 |

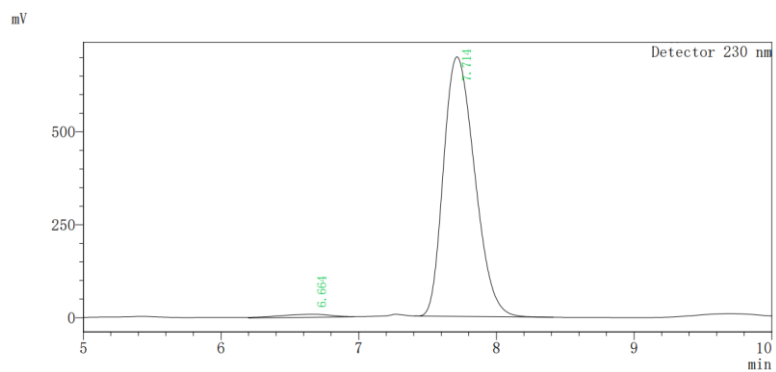

| No.   | Ret. Time (min) | Height | Height% | Area     | Area%   |
|-------|-----------------|--------|---------|----------|---------|
| 1     | 6.664           | 8025   | 1.136   | 215381   | 1.919   |
| 2     | 7.714           | 698147 | 98.864  | 11005933 | 98.081  |
| Total |                 | 706173 | 100.000 | 11221314 | 100.000 |

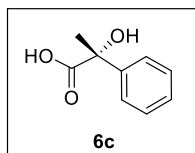

**(R)-2-hydroxy-2-phenylpropanoic acid (6c):** General Procedure C was followed using **5ac** (416 mg, 1.7 mmol). After extraction, the desired product was obtained as solid (257 mg, 91% yield, 97% ee). The absolute configuration was determined by comparing its optical rotation with reported data<sup>[5]</sup>. Chiral HPLC conditions: chiralpak AS-H, 25 °C, flow rate: 1.0 mL/min, hexane/isopropanol/trifluoroacetic acid: 90/10/0.1, 230 nm, 10.5 min (*S*), 11.6 min (*R*);  $[\alpha]^{25}_D = -24.2^\circ$  ( $c = 1.2$ ,  $\text{CHCl}_3$ );  $^1\text{H}$  NMR (400 MHz,  $\text{DMSO}-d_6$ )  $\delta$  12.62 (br.s, 1H), 7.55 - 7.47 (m, 2H), 7.37 - 7.30 (m, 2H), 7.28 - 7.22 (m, 1H), 5.77 (br.s, 1H), 1.61 (s, 3H);  $^{13}\text{C}$  NMR (101 MHz,  $\text{DMSO}$ )  $\delta$  176.6, 144.9, 128.3, 127.5, 125.7, 75.3, 27.8; HRMS (ESI):  $m/z$  calcd. for  $[\text{M}+2\text{Na}-\text{H}, \text{C}_9\text{H}_9\text{Na}_2\text{O}_3]^+$  : 211.0342; found: 211.0345.

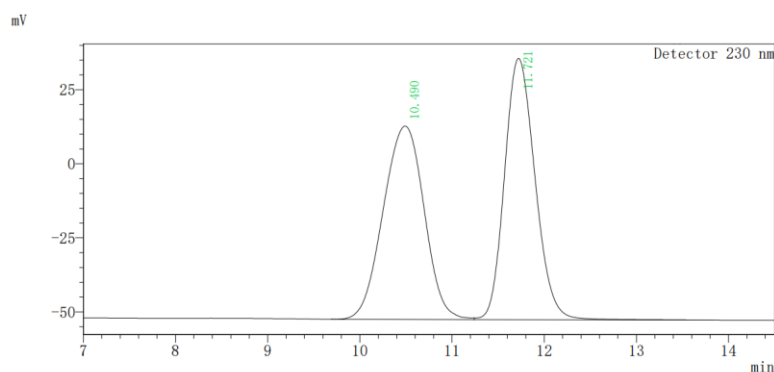

| No.   | Ret. Time (min) | Height | Height% | Area    | Area%   |
|-------|-----------------|--------|---------|---------|---------|
| 1     | 10.490          | 65289  | 42.540  | 2020584 | 49.831  |
| 2     | 11.721          | 88190  | 57.460  | 2034257 | 50.169  |
| Total |                 | 153479 | 100.000 | 4054841 | 100.000 |

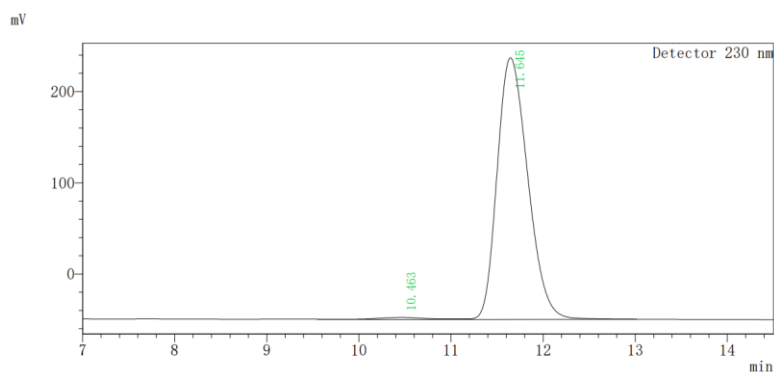

| No.   | Ret. Time (min) | Height | Height% | Area    | Area%   |
|-------|-----------------|--------|---------|---------|---------|
| 1     | 10.463          | 2232   | 0.773   | 86987   | 1.298   |
| 2     | 11.645          | 286714 | 99.227  | 6615456 | 98.702  |
| Total |                 | 288947 | 100.000 | 6702444 | 100.000 |

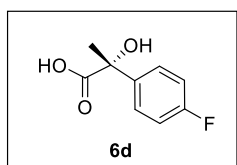

**(*R*)-2-(4-fluorophenyl)-2-hydroxypropanoic acid (6d):**

General Procedure C was followed using **5ad** (84.2 mg, 0.32 mmol). After extraction, the desired product was obtained as solid (54.2 mg, 87% yield, 97% ee). Chiral HPLC conditions: chiralcel AD-H, 25 °C, flow rate: 1.0 mL/min, hexane /isopropanol/trifluoroacetic acid: 90/10/0.1, 230 nm, 10.5 min (*S*), 11.4 min (*R*);  $[\alpha]_D^{25} = -11.0^\circ$  ( $c = 0.4$ ,  $\text{CHCl}_3$ );  $^1\text{H}$  NMR (400 MHz,  $\text{DMSO}-d_6$ )  $\delta$  7.56 - 7.52 (m, 2H), 7.15 (t,  $J = 8.7$  Hz, 1H), 3.51 (br.s, 1H), 1.61 (s, 3H);  $^{13}\text{C}$  NMR (101 MHz,  $\text{DMSO}-d_6$ )  $\delta$  176.4, 161.8 (d,  $J = 242.9$  Hz), 141.1 (d,  $J = 3.0$  Hz), 127.8 (d,  $J = 8.1$  Hz), 115.0 (d,  $J = 21.2$  Hz), 75.0, 27.9; HRMS (ESI):  $m/z$  calcd. for  $[\text{M}+2\text{Na}-\text{H}, \text{C}_9\text{H}_8\text{FNa}_2\text{O}_3]^+$ : 229.0247; found: 229.0246.

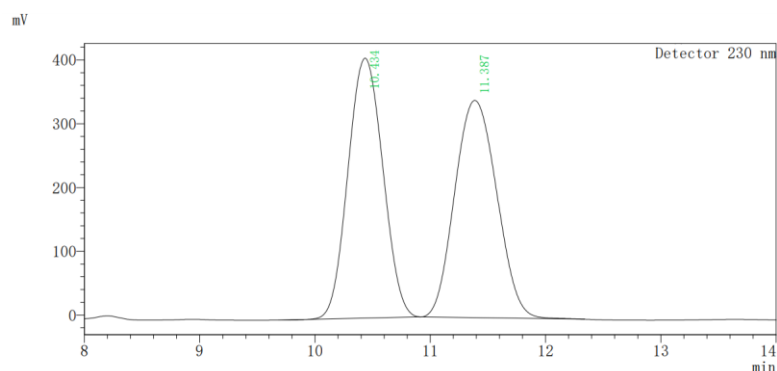

| No.   | Ret. Time (min) | Height | Height% | Area     | Area%   |
|-------|-----------------|--------|---------|----------|---------|
| 1     | 10.434          | 407669 | 54.478  | 8546701  | 49.767  |
| 2     | 11.387          | 340651 | 45.522  | 8626736  | 50.233  |
| Total |                 | 748321 | 100.000 | 17173437 | 100.000 |

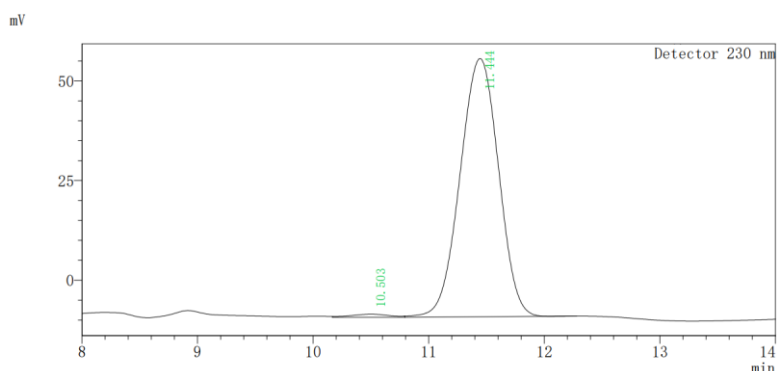

| No.   | Ret. Time (min) | Height | Height% | Area    | Area%   |
|-------|-----------------|--------|---------|---------|---------|
| 1     | 10.503          | 816    | 1.243   | 19177   | 1.263   |
| 2     | 11.444          | 64786  | 98.757  | 1499036 | 98.737  |
| Total |                 | 65602  | 100.000 | 1518213 | 100.000 |

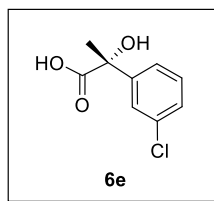

**(R)-2-(3-chlorophenyl)-2-hydroxypropanoic acid (6e):** General Procedure C was followed using **5ae** (65.0 mg, 0.24 mmol). After extraction, the desired product was obtained as solid (43.6 mg, 91% yield, 95% ee). Chiral HPLC conditions: chiralcel AD-H, 25 °C, flow rate: 1.0 mL/min, hexane/isopropanol/ trifluoroacetic acid: 90/10/0.1, 230 nm, 9.1 min (*S*), 10.9 min (*R*);  $[\alpha]_D^{25} = -24.7^\circ$  ( $c = 1.0$ ,  $\text{CHCl}_3$ );  $^1\text{H}$  NMR (400 MHz,  $\text{DMSO}-d_6$ )  $\delta$  7.58 (t,  $J = 1.9$  Hz, 1H), 7.50 (dt,  $J = 7.5, 1.6$  Hz, 1H), 7.45 - 7.34 (m, 2H), 3.48 (br.s, 1H), 1.65 (s, 3H);  $^{13}\text{C}$  NMR (101 MHz,  $\text{DMSO}$ )  $\delta$  176.0, 147.4, 133.3, 130.4, 127.6, 125.7, 124.6, 75.2, 27.8; HRMS (ESI):  $m/z$  calcd. For  $[\text{M}+\text{Na}, \text{C}_9\text{H}_9\text{ClNaO}_3]^+$ : 223.0132; found: 223.0129.

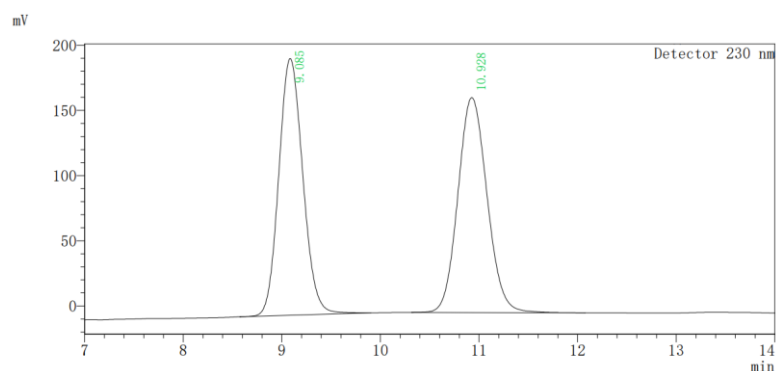

| No.   | Ret. Time (min) | Height | Height% | Area    | Area%   |
|-------|-----------------|--------|---------|---------|---------|
| 1     | 9.085           | 196913 | 54.430  | 3333164 | 49.620  |
| 2     | 10.928          | 164863 | 45.570  | 3384196 | 50.380  |
| Total |                 | 361776 | 100.000 | 6717359 | 100.000 |

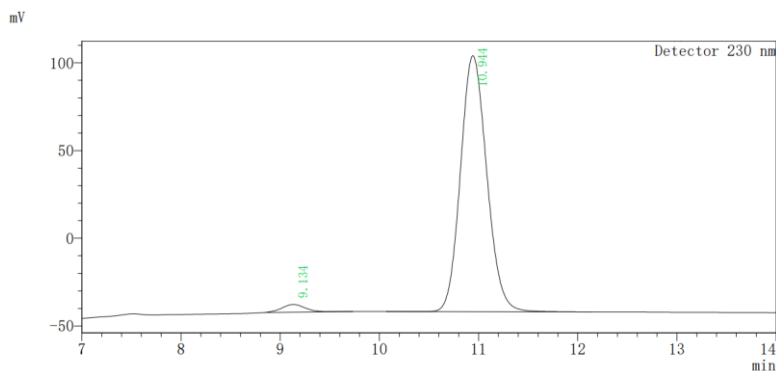

| No.   | Ret. Time (min) | Height | Height% | Area    | Area%   |
|-------|-----------------|--------|---------|---------|---------|
| 1     | 9.134           | 4453   | 2.961   | 74632   | 2.697   |
| 2     | 10.944          | 145938 | 97.039  | 2692933 | 97.303  |
| Total |                 | 150391 | 100.000 | 2767565 | 100.000 |

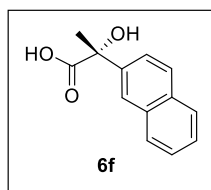

**(*R*)-2-hydroxy-2-(naphthalen-2-yl)propanoic acid (6f):**

General Procedure C was followed using **5al** (66.4 mg, 0.24 mmol). After extraction, the desired product was obtained as solid (46.8 mg, 94% yield, 93% ee). Chiral HPLC conditions: chiralpak AS-H, 25 °C, flow rate: 1.0 mL/min, hexane /isopropanol/trifluoroacetic acid: 85/15/0.1, 230 nm, 9.8 min (*S*), 11.9 min (*R*);  $[\alpha]_D^{25} = -8.1^\circ$  ( $c = 0.20$ ,  $\text{CHCl}_3$ );  $^1\text{H}$  NMR (400 MHz,  $\text{DMSO}-d_6$ )  $\delta$  12.56 (br, 0.89H), 8.04 (s, 1H), 7.96 - 7.82 (m, 3H), 7.68 - 7.65 (m, 1H), 7.50 (m, 2H), 6.05 (br, 0.74H), 1.74 (s, 3H);  $^{13}\text{C}$  NMR (101 MHz,  $\text{DMSO}$ )  $\delta$  176.5, 142.4, 133.0, 132.6, 128.6, 127.9, 127.8, 126.6, 126.4, 124.5, 124.1, 75.6, 27.8; HRMS (ESI):  $m/z$  calcd. for  $[\text{M}+\text{Na}]^+$ ,  $\text{C}_{13}\text{H}_{12}\text{NaO}_3$ : 239.0679; found: 239.0676.

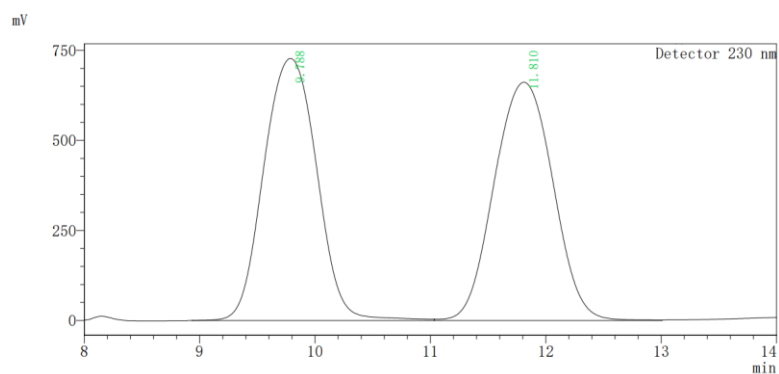

Detector 230 nm

| No.   | Ret. Time (min) | Height  | Height% | Area     | Area%   |
|-------|-----------------|---------|---------|----------|---------|
| 1     | 9.788           | 727463  | 52.374  | 23281934 | 49.847  |
| 2     | 11.810          | 661521  | 47.626  | 23425013 | 50.153  |
| Total |                 | 1388984 | 100.000 | 46706947 | 100.000 |

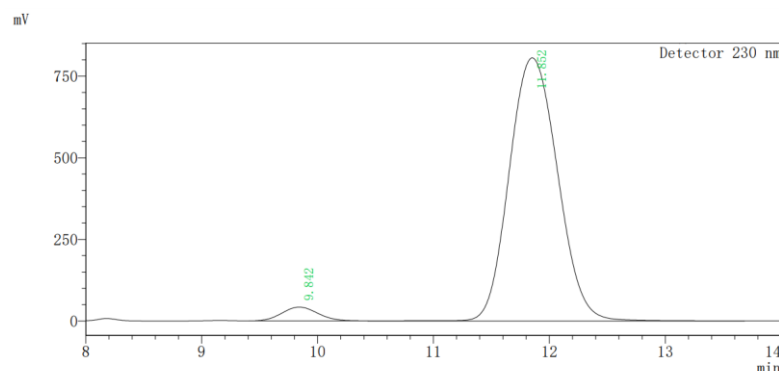

Detector 230 nm

| No.   | Ret. Time (min) | Height | Height% | Area     | Area%   |
|-------|-----------------|--------|---------|----------|---------|
| 1     | 9.842           | 42169  | 4.972   | 900995   | 3.710   |
| 2     | 11.852          | 806021 | 95.028  | 23383346 | 96.290  |
| Total |                 | 848190 | 100.000 | 24284341 | 100.000 |

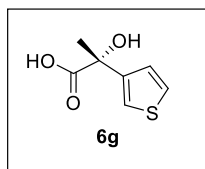

**(*R*)-2-hydroxy-2-(thiophen-3-yl)propanoic acid (6g):** General Procedure C was followed using **5ai** (87.4 mg, 0.36 mmol). After extraction, the desired product was obtained as solid (53.7 mg, 87% yield, 94% ee). Chiral HPLC conditions: chiralpak AS-H, 25 °C, flow rate: 1.0 mL/min, hexane/isopropanol/trifluoroacetic acid: 85/15/0.1, 230 nm, 8.7 min (*S*), 11.3 min (*R*);  $[\alpha]_D^{25} = -9.7^\circ$  ( $c = 0.3$ ,  $\text{CHCl}_3$ );  $^1\text{H}$  NMR (400 MHz,  $\text{DMSO}-d_6$ )  $\delta$  12.62 (br.s, 1H), 7.45 (m, 1H), 7.40 - 7.39 (m, 1H), 7.13 (dd,  $J = 5.0, 1.3$  Hz, 1H), 5.73 (br.s, 1H), 1.60 (s, 3H);  $^{13}\text{C}$  NMR (101 MHz,  $\text{DMSO}$ )  $\delta$  176.3, 146.6, 127.0, 126.2, 121.4, 74.0, 27.8; HRMS (ESI):  $m/z$  calcd. for  $[\text{M}+2\text{Na}-\text{H}, \text{C}_7\text{H}_7\text{Na}_2\text{O}_3\text{S}]^+$ : 216.9906; found: 216.9909.

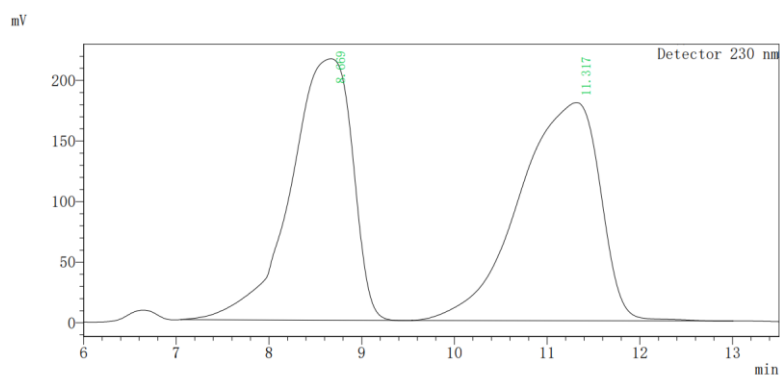

Detector 230 nm

| No.   | Ret. Time (min) | Height | Height% | Area     | Area%   |
|-------|-----------------|--------|---------|----------|---------|
| 1     | 8.669           | 215647 | 54.488  | 10014306 | 47.819  |
| 2     | 11.317          | 180119 | 45.512  | 10928012 | 52.181  |
| Total |                 | 395766 | 100.000 | 20942318 | 100.000 |

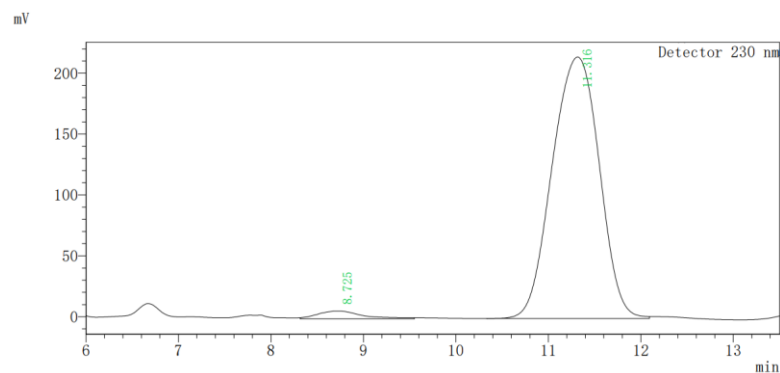

Detector 230 nm

| No.   | Ret. Time (min) | Height | Height% | Area    | Area%   |
|-------|-----------------|--------|---------|---------|---------|
| 1     | 8.725           | 6351   | 2.873   | 217776  | 2.778   |
| 2     | 11.316          | 214698 | 97.127  | 7620703 | 97.222  |
| Total |                 | 221049 | 100.000 | 7838480 | 100.000 |

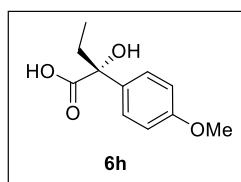

**(R)-2-hydroxy-2-(4-methoxyphenyl)butanoic acid (6h):**

General Procedure C was followed using **5la** (95.2 mg, 0.32 mmol). After extraction, the desired product was obtained as a colorless solid (12.8 mg, 19% yield, 97% ee). Chiral HPLC conditions: chiralpak AS-H, 25 °C, flow rate: 1.0 mL/min, hexane/isopropanol /trifluoroacetic acid: 90/10/0.1, 230 nm, 10.9 min (*S*), 11.9 min (*R*);  $[\alpha]_D^{25} = -41.4^\circ$  ( $c = 0.3$ ,  $\text{CHCl}_3$ );  $^1\text{H}$  NMR (400 MHz,  $\text{DMSO}-d_6$ )  $\delta$  12.62 (br.s, 1H), 7.52 - 7.33 (m, 2H), 6.97 - 6.77 (m, 2H), 5.41 (br.s, 1H), 3.73 (s, 3H), 2.07 (dq,  $J = 14.3$ , 7.2 Hz, 1H), 1.83 (dq,  $J = 14.3$ , 7.3 Hz, 1H), 0.78 (t,  $J = 7.2$  Hz, 3H);  $^{13}\text{C}$  NMR (101 MHz,  $\text{DMSO}$ )  $\delta$  176.5, 158.8, 135.6, 127.3, 113.7, 77.9, 55.5, 32.8, 8.7; HRMS (ESI):  $m/z$  calcd. for  $[\text{M}+\text{Na}, \text{C}_{11}\text{H}_{14}\text{NaO}_4]^+$  : 233.0784; found: 233.0786.

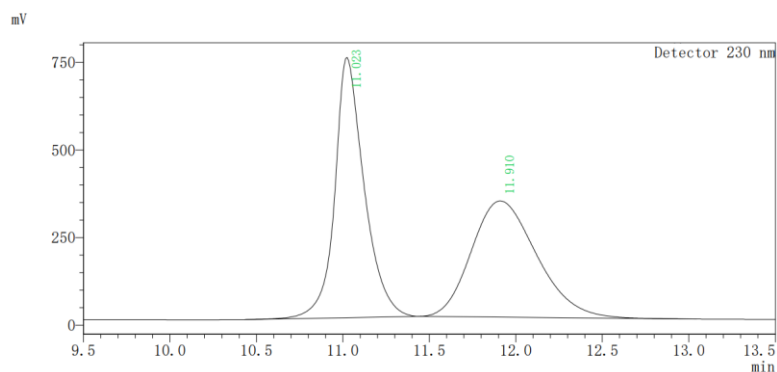

| No.   | Ret. Time (min) | Height  | Height% | Area     | Area%   |
|-------|-----------------|---------|---------|----------|---------|
| 1     | 11.023          | 742748  | 69.120  | 8791007  | 50.206  |
| 2     | 11.910          | 331829  | 30.880  | 8718770  | 49.794  |
| Total |                 | 1074577 | 100.000 | 17509777 | 100.000 |

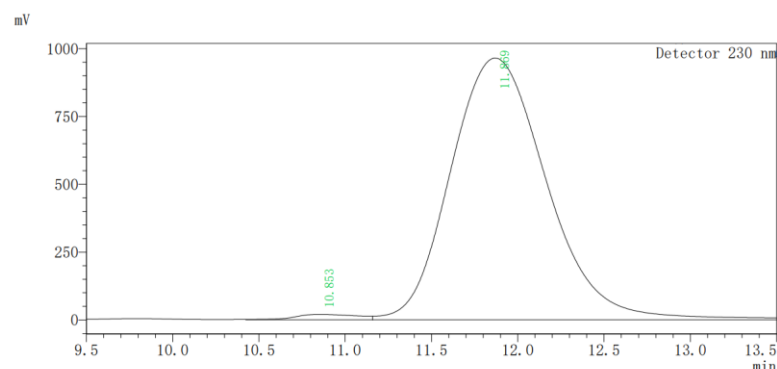

| No.   | Ret. Time (min) | Height | Height% | Area     | Area%   |
|-------|-----------------|--------|---------|----------|---------|
| 1     | 10.853          | 20309  | 2.061   | 527601   | 1.376   |
| 2     | 11.869          | 964945 | 97.939  | 37807471 | 98.624  |
| Total |                 | 985253 | 100.000 | 38335072 | 100.000 |

## 9. Transformations of chiral $\alpha$ -Hydroxy Acid.

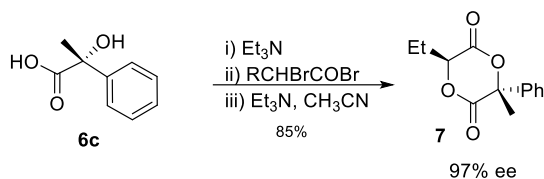

Compound **7** was synthesized according reported literature<sup>[6]</sup>. 2-Bromobutanoyl bromide (151.7mg, 0.66 mmol) was added to a stirred solution of (*R*)-**6c** (100mg, 0.6mmol) and Et<sub>3</sub>N (67 mg, 0.66 mmol) in MeCN (2 mL) at 0-5°C under an N<sub>2</sub> atmosphere and the mixture was stirred for 30 min. Et<sub>3</sub>N (67mg, 0.66 mmol) was added to the mixture at the same temperature, then the reaction was stirred at 50-55°C for 3 h and at 70-75°C for 30 min. The mixture was allowed to cool to r.t. then aq HCl (1M, 1mL) was added and the mixture was diluted with EtOAc (10 mL) and water (8 mL). Organic layer was separated, the water layer was extracted with EtOAc (10 mL x 2). The combined organic phase was washed with H<sub>2</sub>O (15 mL), brine (15 mL), dried over sodium sulfate, concentrated, and purified by flash chromatography with petroleum ether/ethyl acetate (40/1 → 30/1, v/v) to afford the desired product **7** as white solid (119mg, 85% yield, 97% ee). Chiral HPLC conditions: chiralpak IC, 25 °C, flow rate: 1.0 mL/min, hexane/isopropanol: 98/2, 254 nm, 6.6 min (*R*), 7.4 min (*S*);  $[\alpha]^{25}_{\text{D}} = -77.9^\circ$  ( $c = 0.82$ , CHCl<sub>3</sub>); <sup>1</sup>H NMR (400 MHz, Chloroform-*d*)  $\delta$  7.46 - 7.37 (m, 5H), 4.27 (q,  $J = 11.04$  Hz, 1H), 2.12 - 1.75 (m, 5.39H), 0.98 (t,  $J = 7.4$  Hz, 3H); <sup>13</sup>C NMR (101 MHz, CDCl<sub>3</sub>)  $\delta$  167.3, 167.0, 137.1, 129.7, 129.4, 123.8, 84.2, 77.0, 28.1, 23.5, 8.5; IR (KBr, cm<sup>-1</sup>): 3061, 2976, 1734, 1448, 1259, 1101, 799, 698; HRMS (FI):  $m/z$  calcd. for [M, C<sub>13</sub>H<sub>14</sub>O<sub>4</sub>]<sup>+</sup> : 234.0887; found: 234.0889.

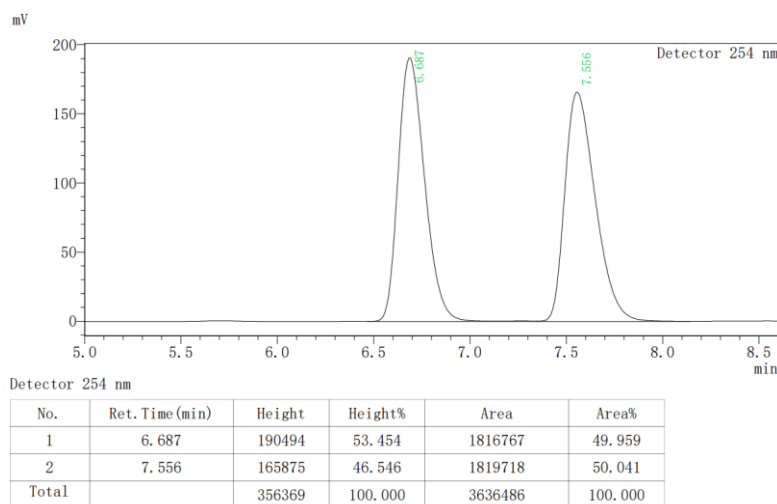

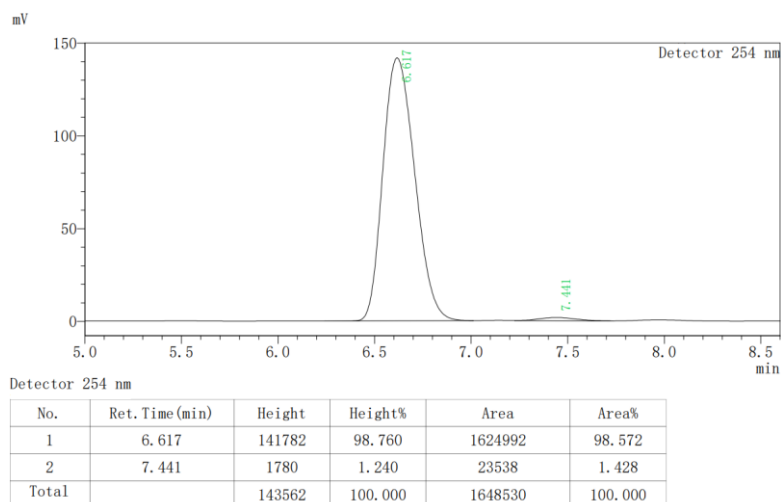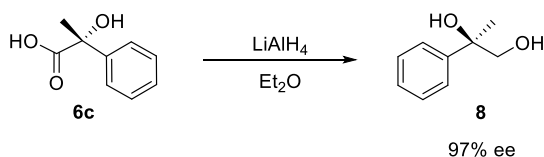

Compound **8** was synthesized according reported literature<sup>[7]</sup>. To a suspension of LiAlH<sub>4</sub> (189.7 mg, 5 mmol) in extra dry diethyl ether (5 mL) at 0°C was added slowly a solution of  $\alpha$ -hydroxy acid **6c** (332.3 mg, 2 mmol) in diethyl ether (10 mL) under N<sub>2</sub> atmosphere. The reaction was stirred at room temperature for 2 h, then quenched by consecutive addition of 0.25 mL H<sub>2</sub>O, 0.25 mL NaOH aq (15 wt%) and 0.6 mL H<sub>2</sub>O. The solid in mixture was filtered and washed with ether (50 mL). The collective organic phase was dried over anhydrous sodium sulfate, filtered, and concentrated to provide crude product, which was purified by flash chromatography with petroleum ether/ethyl acetate (4/1  $\rightarrow$  2/1, v/v) to afford diol **8** as colorless oil (276 mg, 91% yield 97% ee). Chiral HPLC conditions: chiralcel AD-H, 25 °C, flow rate: 1.0 mL/min, hexane/isopropanol: 80/20, 254 nm, 5.3 min (*S*), 5.7 min (*R*);  $[\alpha]_D^{25} = -7.7^\circ$  ( $c = 1.15$ , CHCl<sub>3</sub>); <sup>1</sup>H NMR (400 MHz, Chloroform-*d*)  $\delta$  7.30 - 7.27 (m, 2H), 7.23 - 7.20 (m, 2H), 7.17 - 7.10 (m, 1H), 3.54 (d,  $J = 11.2$  Hz, 1H), 3.40 (d,  $J = 11.3$  Hz, 1H), 3.31 (br.s, 0.88H), 1.34 (s, 3H); <sup>13</sup>C NMR (101 MHz, CDCl<sub>3</sub>)  $\delta$  144.9, 128.2, 126.9, 125.0, 74.8, 70.6, 25.8; HRMS (FI):  $m/z$  calcd. for [M, C<sub>9</sub>H<sub>12</sub>O<sub>2</sub>]<sup>+</sup> : 152.0832; found: 152.0829.

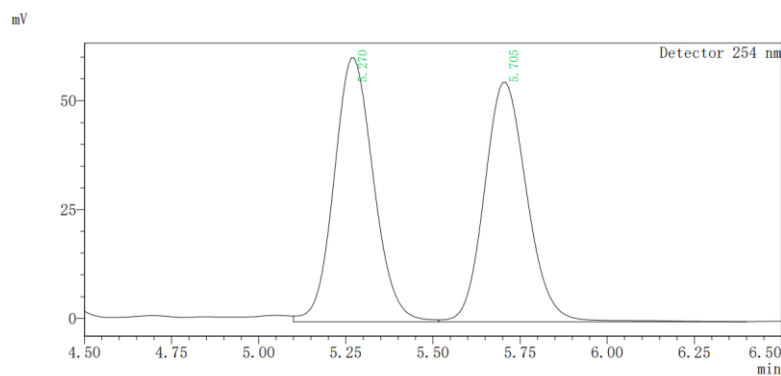

Detector 254 nm

| No.   | Ret. Time (min) | Height | Height% | Area   | Area%   |
|-------|-----------------|--------|---------|--------|---------|
| 1     | 5.270           | 60666  | 52.428  | 477521 | 50.565  |
| 2     | 5.705           | 55047  | 47.572  | 466853 | 49.435  |
| Total |                 | 115713 | 100.000 | 944375 | 100.000 |

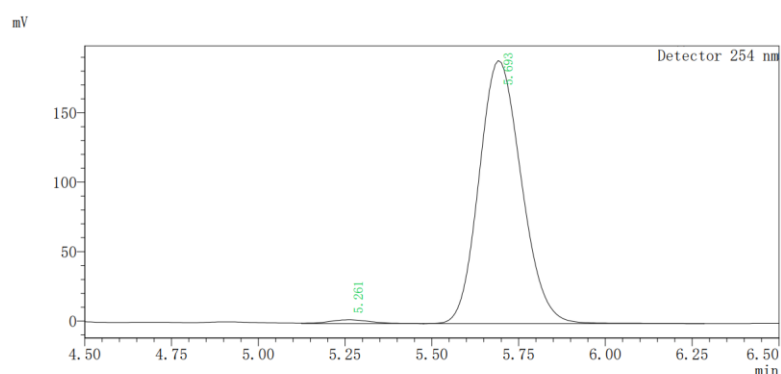

Detector 254 nm

| No.   | Ret. Time (min) | Height | Height% | Area    | Area%   |
|-------|-----------------|--------|---------|---------|---------|
| 1     | 5.261           | 2780   | 1.447   | 23605   | 1.452   |
| 2     | 5.693           | 189375 | 98.553  | 1601949 | 98.548  |
| Total |                 | 192155 | 100.000 | 1625554 | 100.000 |

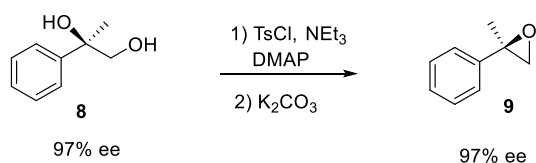

Compound **9** was synthesized according reported literature<sup>[7a, 8]</sup>. To a solution of **8** (232 mg, 1.52 mmol) in extra dry  $\text{CH}_2\text{Cl}_2$  (16 mL) was added  $\text{Et}_3\text{N}$  (200 mg, 1.97 mmol) and the mixture was cooled to  $0^\circ\text{C}$ . Subsequently, tosyl chloride (348.8 mg, 1.83 mmol) and DMAP (18.5 mg, 0.15 mmol) were added to the reaction mixture, the reaction was stirred at the same temperature overnight. After starting material was completely consumed, water (15 mL) was added to the reaction. The mixture was extracted with  $\text{CH}_2\text{Cl}_2$  (20 mL x 2), and combined organic phase was dried over anhydrous sodium sulfate, filtered, concentrated. Crude product was purified by flash column chromatography with petroleum ether/ethyl acetate (10/1  $\rightarrow$  4/1, v/v) to provide the tosylate in 85% yield (395 mg).

Tosylate (97 mg, 0.31 mmol) was dissolved in methanol (4 mL), and potassium carbonate (87.5 mg, 0.62 mmol) was added in one portion. The reaction was stirred at room temperature for about 30 min., TLC showed starting material disappeared. The reaction mixture was diluted with water (15 mL) and extracted with diethyl ether (15 mL x 3). The combined organic layer was washed with saturated sodium chloride solution (20 mL), dried over anhydrous sodium sulfate, filtered and concentrated to give **9** as colorless oil (36.8 mg, 87%, 97% ee). Chiral HPLC conditions: chiralcel OD-H, 25 °C, flow rate: 1.0 mL/min, hexane/isopropanol: 80/20, 254 nm, 4.6 min (*R*), 5.1 min (*S*);  $[\alpha]_D^{25} = -21.4^\circ$  ( $c = 0.1$ ,  $\text{CHCl}_3$ );  $^1\text{H}$  NMR (400 MHz,  $\text{CHloroform-}d$ )  $\delta$  7.40 - 7.27 (m, 5H), 2.98 (d,  $J = 5.4$  Hz, 1H), 2.81 (d,  $J = 5.4$  Hz, 1H), 1.73 (s, 3H);  $^{13}\text{C}$  NMR (101 MHz,  $\text{CDCl}_3$ )  $\delta$  141.2, 128.3, 127.4, 125.3, 57.0, 56.7, 21.8; HRMS (FI):  $m/z$  calcd. for  $[\text{M}, \text{C}_9\text{H}_{10}\text{O}]^+$ : 134.0726; found: 134.0725.

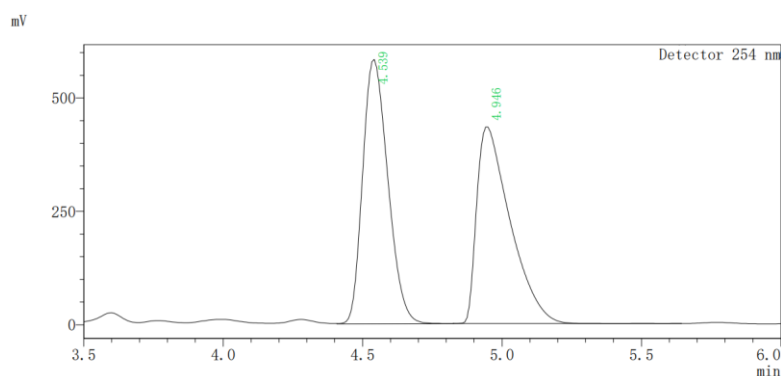

| No.   | Ret. Time (min) | Height  | Height% | Area    | Area%   |
|-------|-----------------|---------|---------|---------|---------|
| 1     | 4.539           | 582551  | 57.352  | 3661026 | 50.365  |
| 2     | 4.946           | 433188  | 42.648  | 3607989 | 49.635  |
| Total |                 | 1015739 | 100.000 | 7269015 | 100.000 |

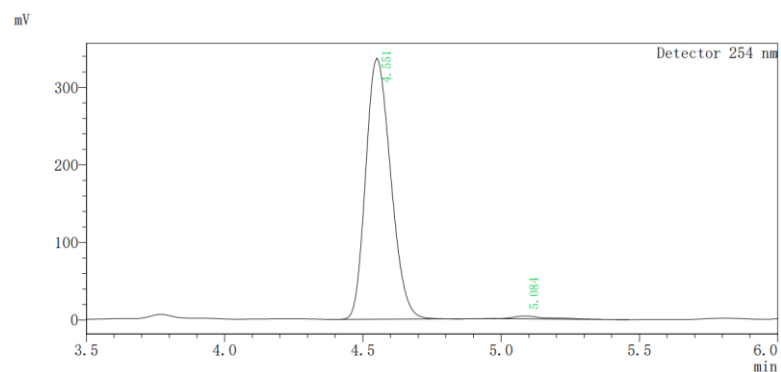

| No.   | Ret. Time (min) | Height | Height% | Area    | Area%   |
|-------|-----------------|--------|---------|---------|---------|
| 1     | 4.551           | 336964 | 98.926  | 2116447 | 98.507  |
| 2     | 5.084           | 3659   | 1.074   | 32080   | 1.493   |
| Total |                 | 340623 | 100.000 | 2148527 | 100.000 |

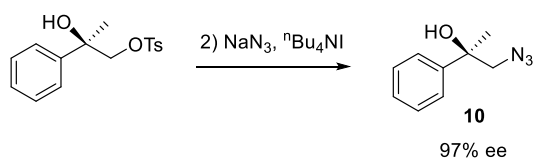

Compound **10** was synthesized according the reported literature<sup>[7a]</sup>. To a solution of tosylate (155mg, 0.5 mmol) in extra dry DMF (4 mL) was added sodium azide (82 mg, 1.25 mmol) and <sup>n</sup>Bu<sub>4</sub>NI (9.2 mg, 0.025 mmol) at room temperature under N<sub>2</sub>. Subsequently, the reaction mixture was heated to 80°C and stirred at that temperature for about 5 h. Then, the solution was cooled to room temperature, water (15 mL) was added and the mixture was extracted with diethyl ether (20 mL x 3). The combined organic phase was washed with water (15 mL), dried over sodium sulfate, filtered off, and concentrated. Purification by flash column chromatography with petroleum ether/ethyl acetate (10/1, v/v) provided the azidoalcohol **10** as colorless oil (75.2 mg, 85%, 97% ee). Chiral HPLC conditions: chiralcel OD-H, 25 °C, flow rate: 1.0 mL/min, hexane/isopropanol: 97/3, 254 nm, 15.6 min (*R*), 17.9 min (*S*); [ $\alpha$ ]<sub>D</sub><sup>25</sup> = -33.4 ° (c = 0.80, CHCl<sub>3</sub>); <sup>1</sup>H NMR (400 MHz, Chloroform-*d*)  $\delta$  7.52 - 7.43 (m, 2H), 7.41 - 7.37 (m, 2H), 7.36 - 7.27 (m, 1H), 3.60 (d, *J* = 12.3 Hz, 1H), 3.45 (d, *J* = 12.3 Hz, 1H), 2.57 (br.s, 1H), 1.60 (s, 3H); <sup>13</sup>C NMR (101 MHz, CDCl<sub>3</sub>)  $\delta$  144.6, 128.4, 127.4, 124.8, 74.5, 62.0, 27.0; HRMS (FI): *m/z* calcd. for [M, C<sub>9</sub>H<sub>11</sub>ON<sub>3</sub>]<sup>+</sup> : 177.0897; found: 177.0901.

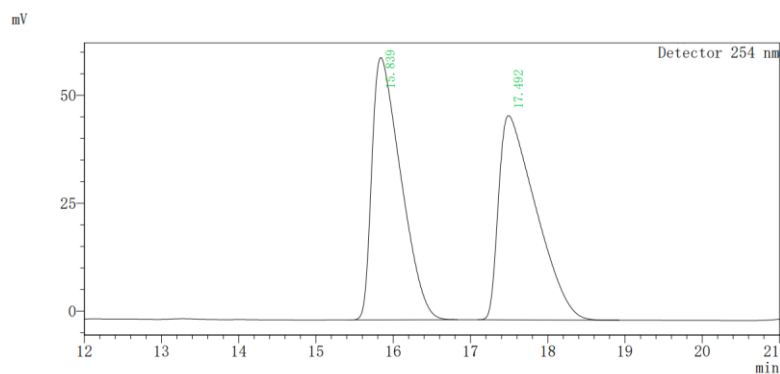

| No.   | Ret. Time (min) | Height | Height% | Area    | Area%   |
|-------|-----------------|--------|---------|---------|---------|
| 1     | 15.839          | 60761  | 56.210  | 1583993 | 49.983  |
| 2     | 17.492          | 47336  | 43.790  | 1585057 | 50.017  |
| Total |                 | 108097 | 100.000 | 3169051 | 100.000 |

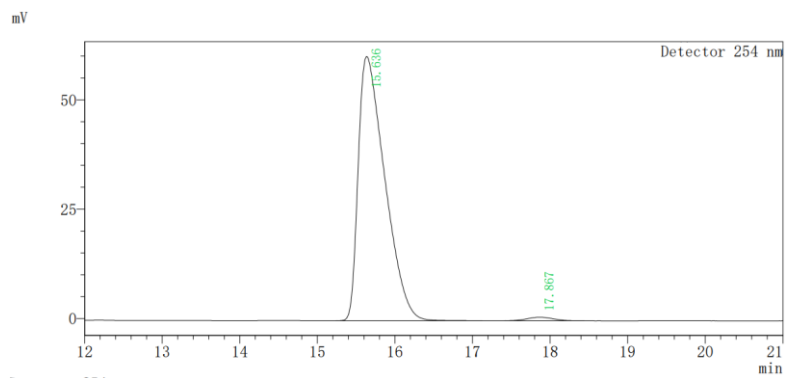

Detector 254 nm

| No.   | Ret. Time (min) | Height | Height% | Area    | Area%   |
|-------|-----------------|--------|---------|---------|---------|
| 1     | 15.636          | 60393  | 98.676  | 1436282 | 98.711  |
| 2     | 17.867          | 810    | 1.324   | 18751   | 1.289   |
| Total |                 | 61203  | 100.000 | 1455034 | 100.000 |

## 10. References

- [1] L. Huang, J. Zhu, G. Jiao, Z. Wang, X. Yu, W.-P. Deng, W. Tang, *Angew. Chem. Int. Ed.* **2016**, *55*, 4527-4531.
- [2] C. G. Watson, V. K. Aggarwal, *Org. Lett.*, **2013**, *15*, 1346-1349.
- [3] S. Alatorre-Santamaría, V. Gotor-Fernández, V. Gotor, *Eur. J. Org. Chem.* **2009**, 2533-2538.
- [4] (a) F. Debaene, J. A. D. Silva, Z. Pianowski, F. J. Duran, and N. Winssinger, *Tetrahedron.* **2007**, *63*, 6577-6586; (b) M. Kim, J. Jeon, J. Song, K. H. Suh, Y. H. Kim, K. H. Min, K.-O. Lee, *Bioorg. Med. Chem. Lett.* **2013**, *23*, 3140-3144.
- [5] (a) E. Hernandez, C. H. Burgos, E. Alicea, J. A. Soderquist, *Org. Lett.* **2006**, *8*, 4089-4091; (b) C. Schuster, M. Knollmueller, P. Gaertner, *Tetrahedron: Asymmetry* **2006**, *17*, 2430-2441.
- [6] R. Nagase, Y. Iida, M. Sugi, T. Misaki, Y. Tanabe, *Synthesis*, **2008**, 3670-3674.
- [7] (a) R. Infante, J. Nieto, C. Andres, *Chem. Eur. J.* **2012**, *18*, 4375-4379; (b) S. Qu, S. M. Smith, V. Laina-Martin, R. M. Neyyappadath, M. D. Greenhalgh, A. D. Smith, *Angew. Chem. Int. Ed.* **2020**, *59*, 16572-16578.
- [8] X.-Y. Han, H. Liu, C.-H. Liu, B. Wu, L.-F. Chen, B.-H. Zhong, K.-L. Liu, *Bioorg. Med. Chem. Lett.* **2005**, *15*, 1979-1982.

## 11. NMR Spectra

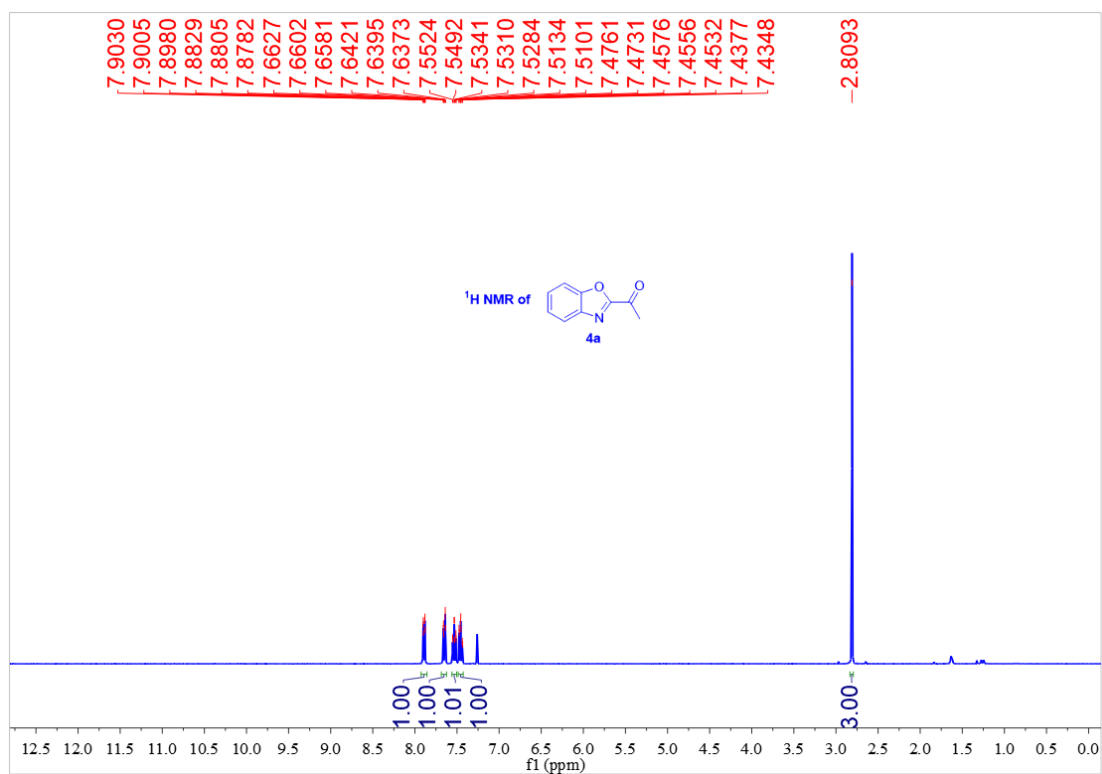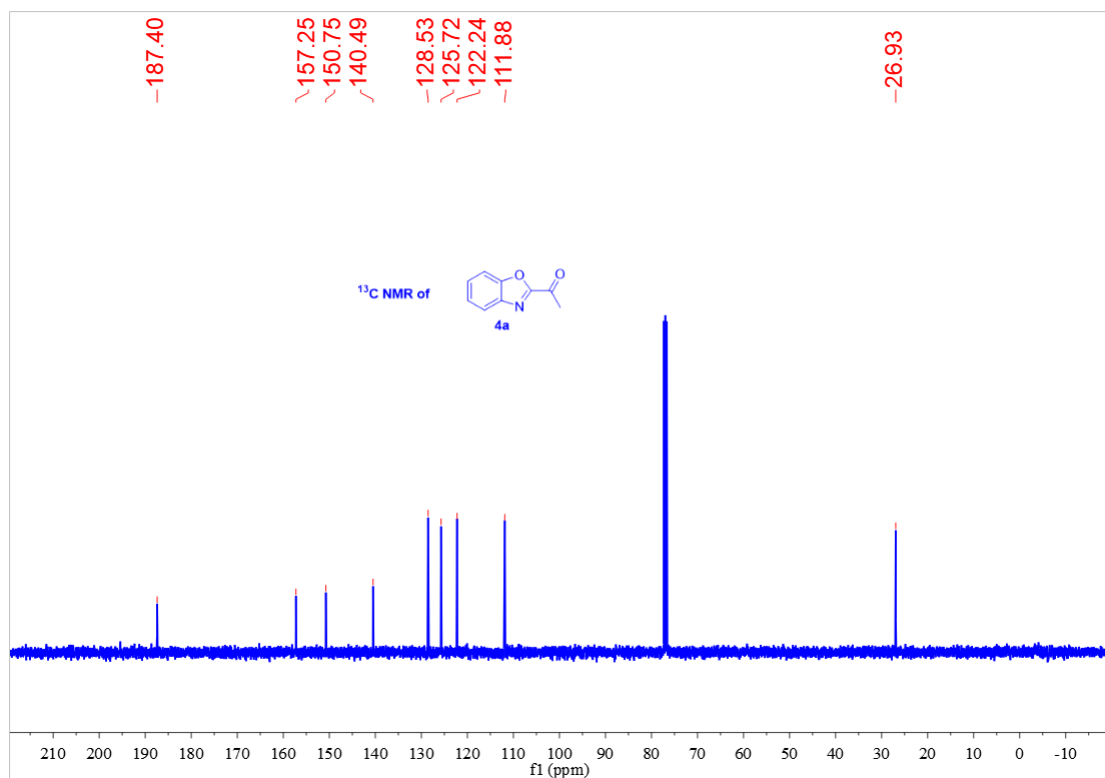

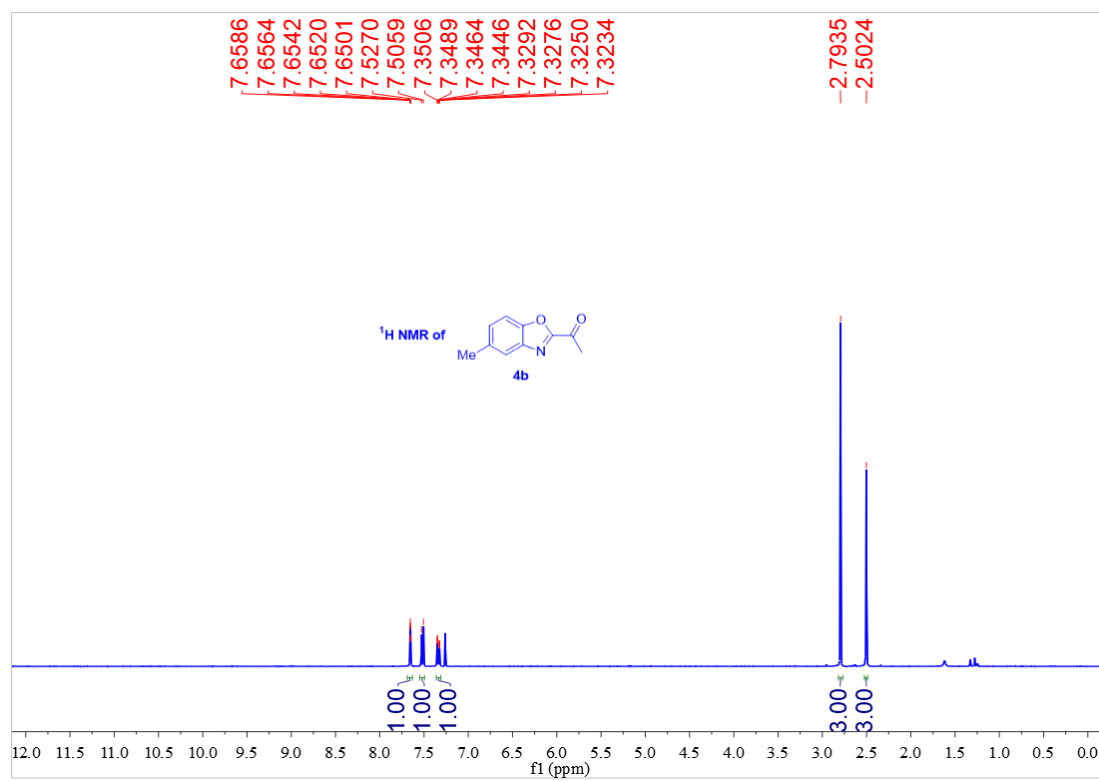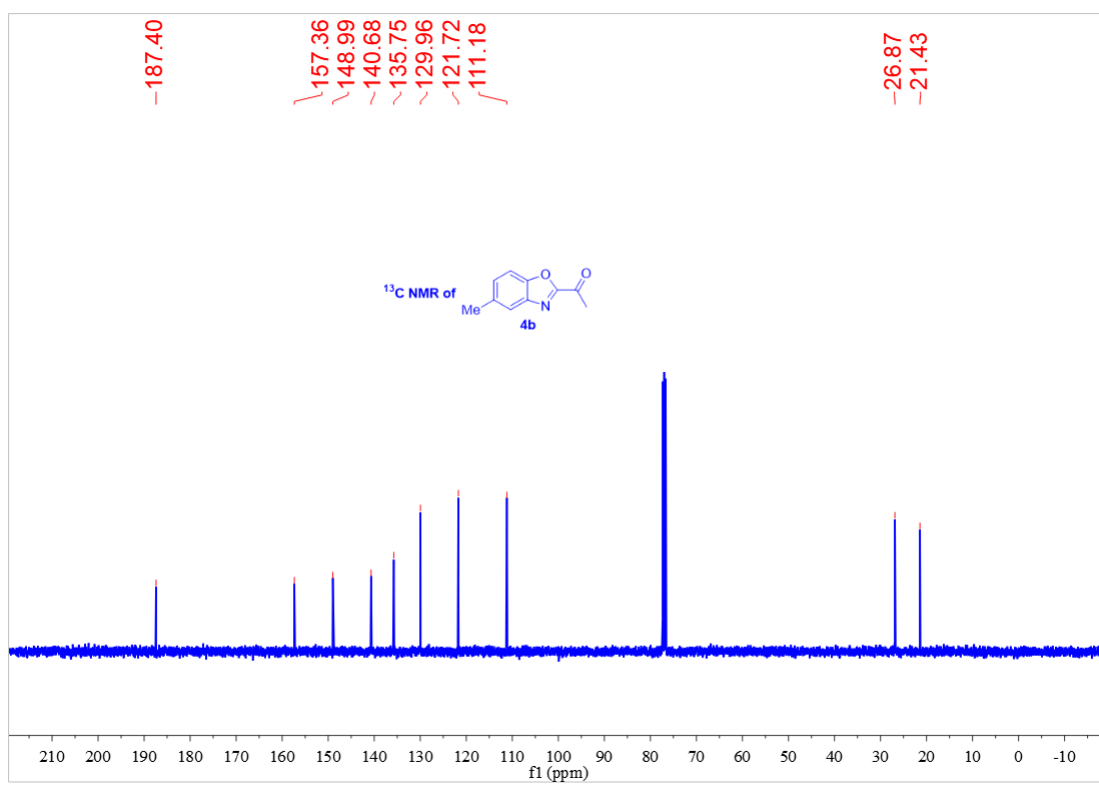

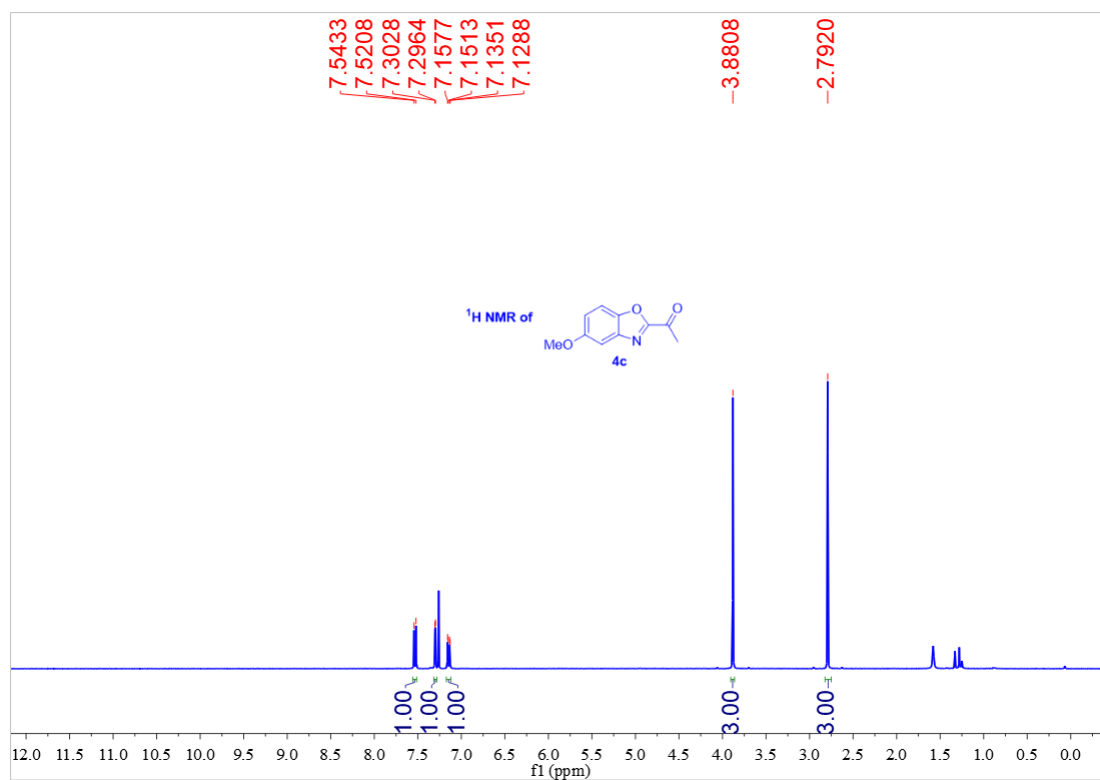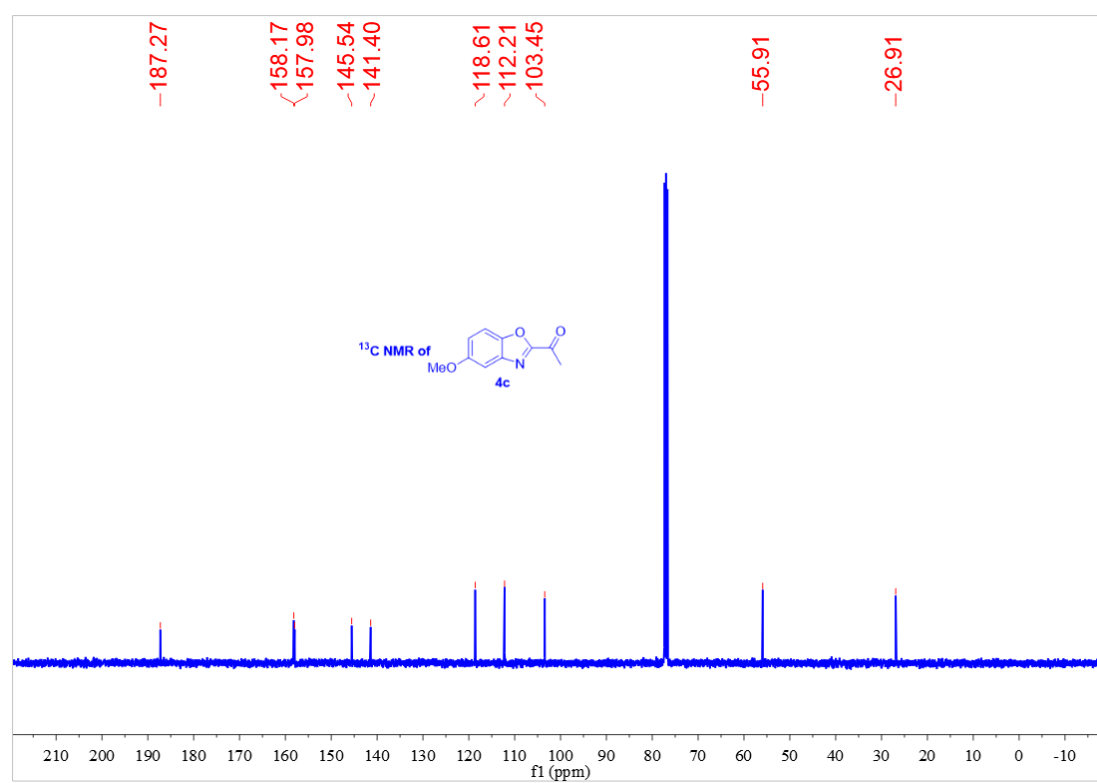

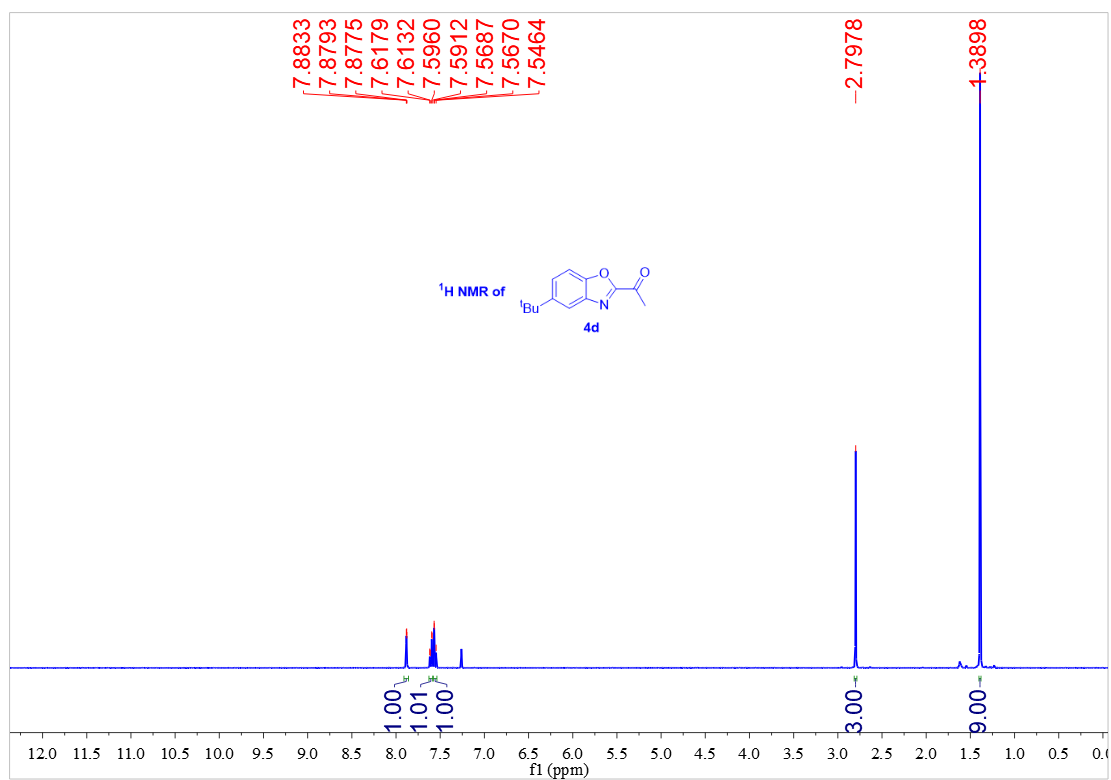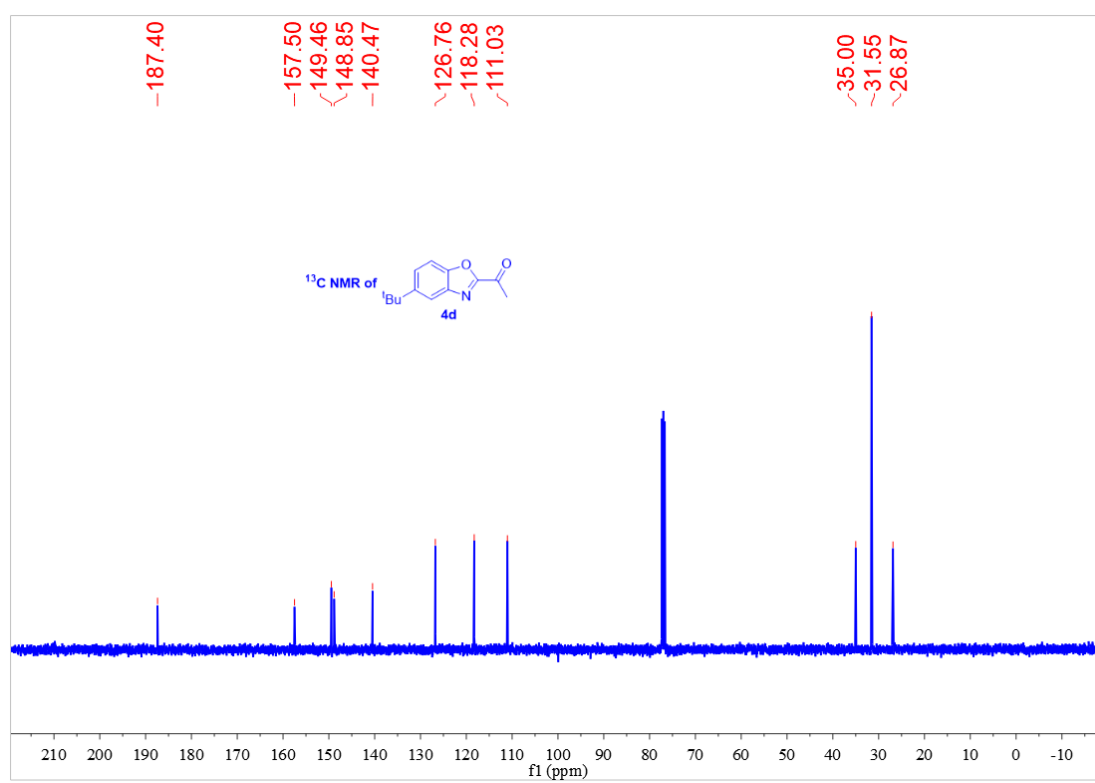

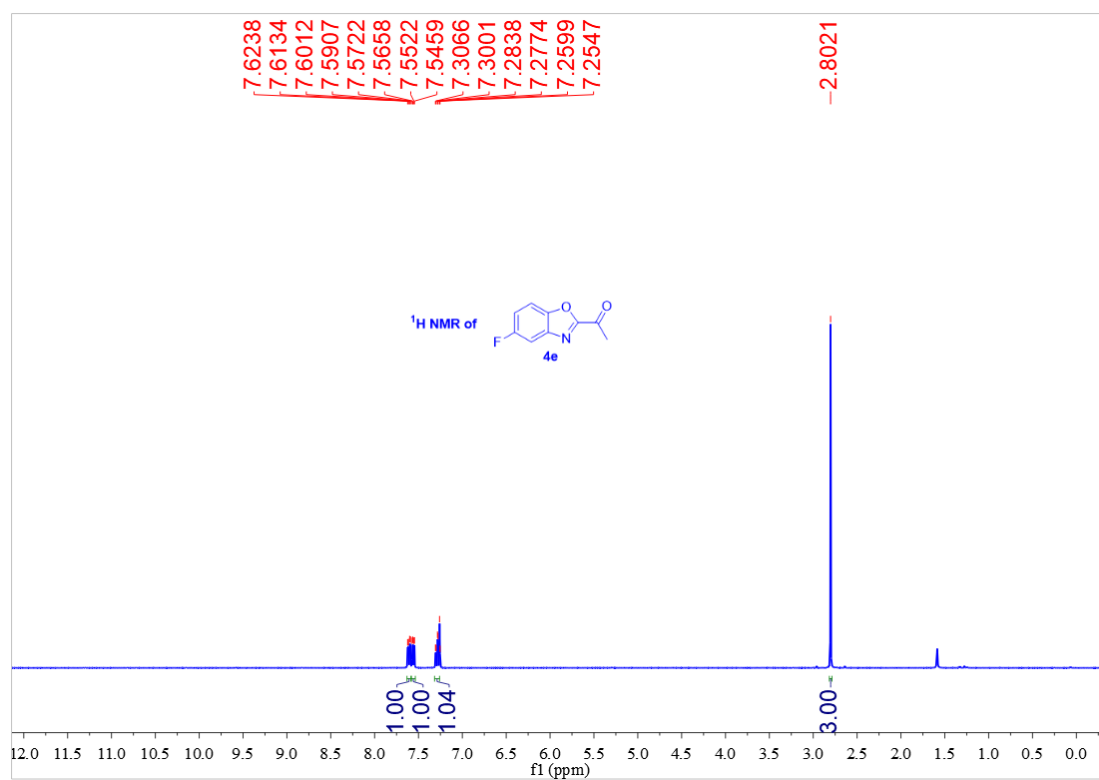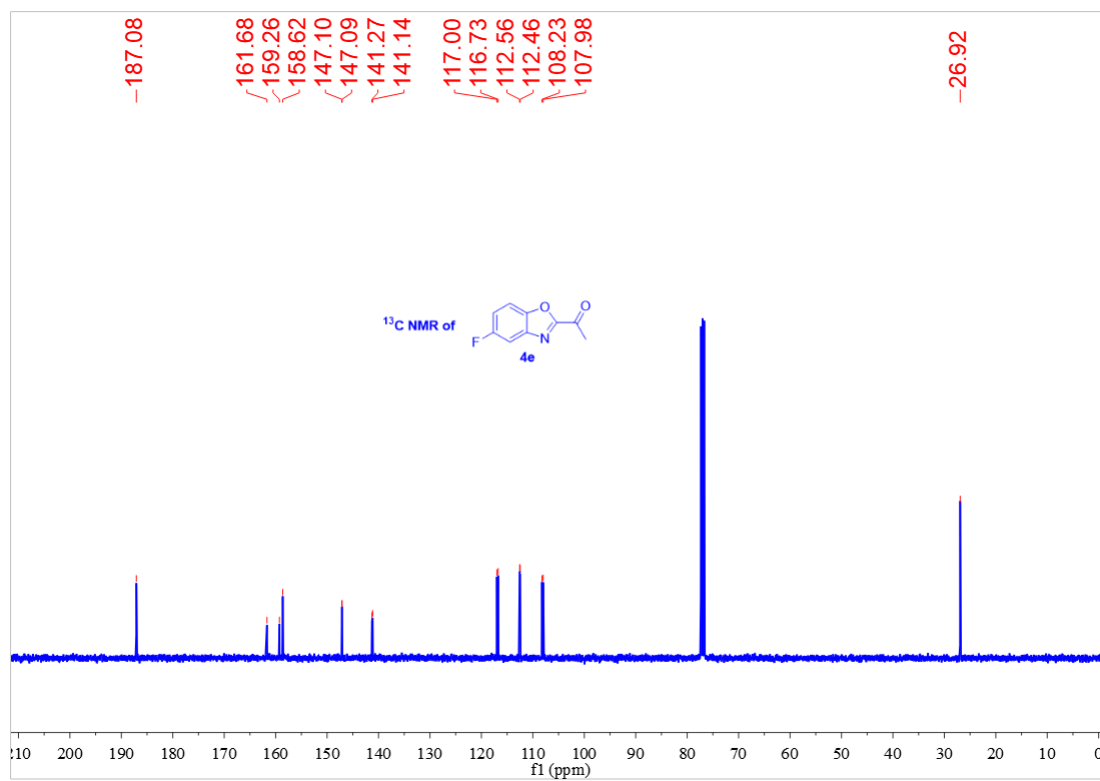

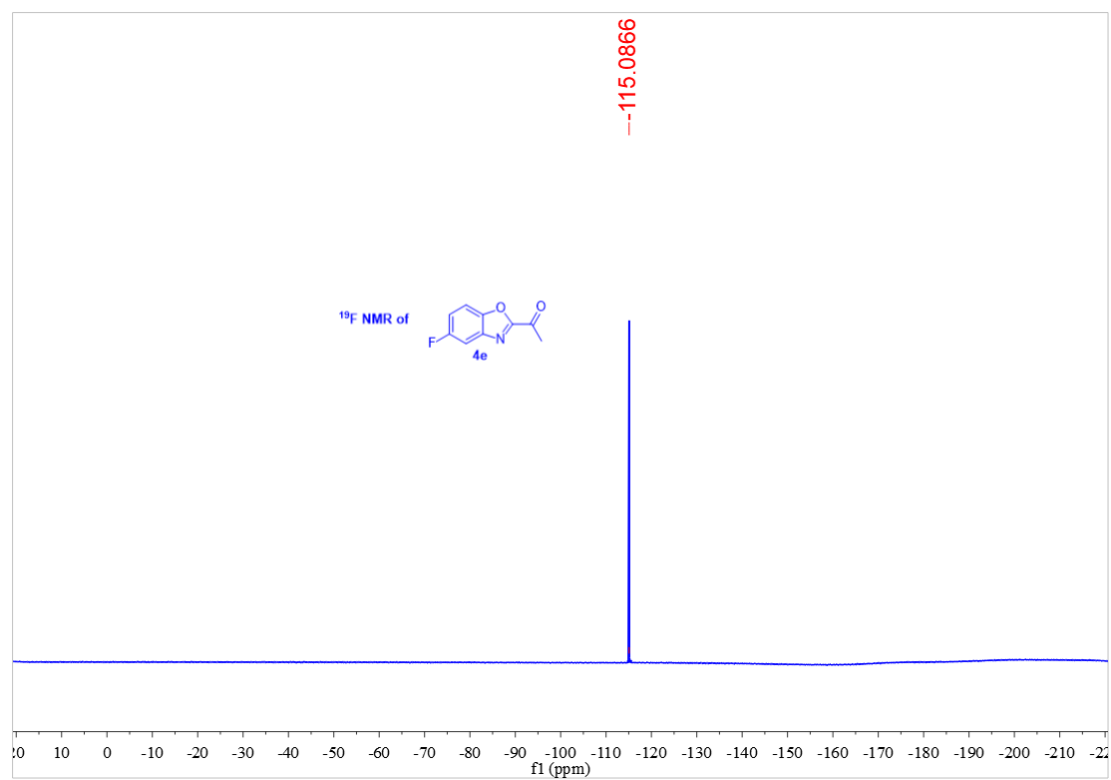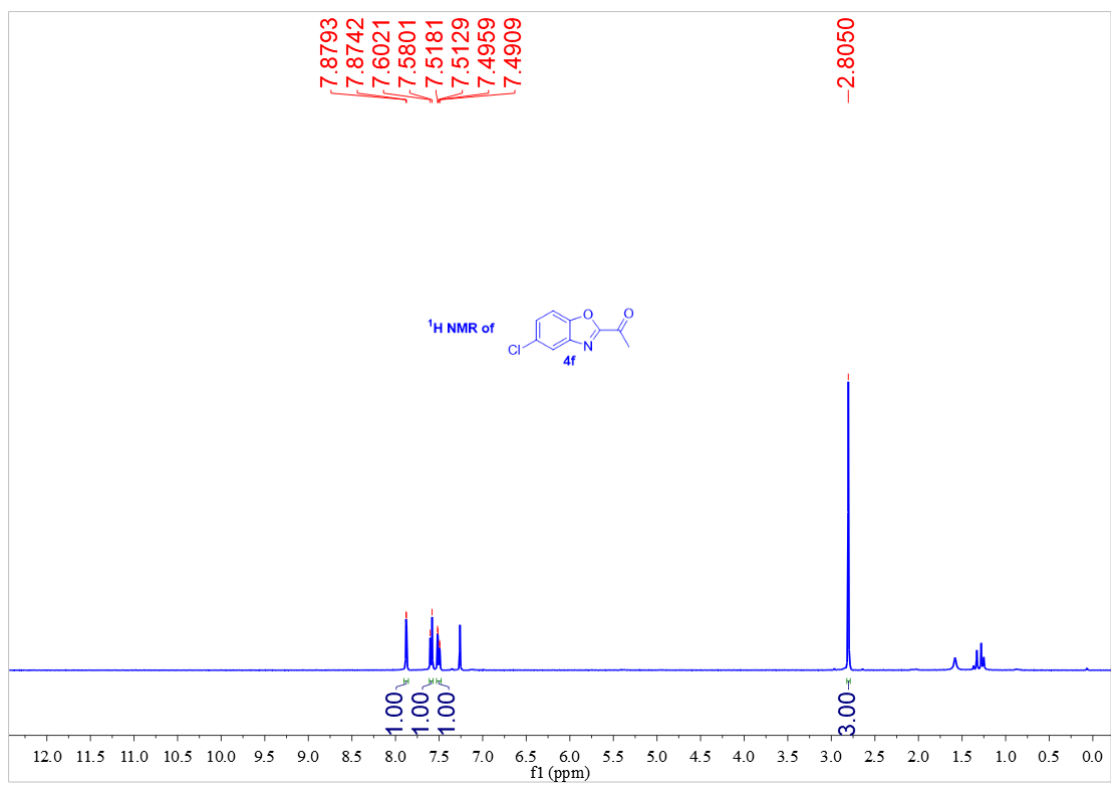

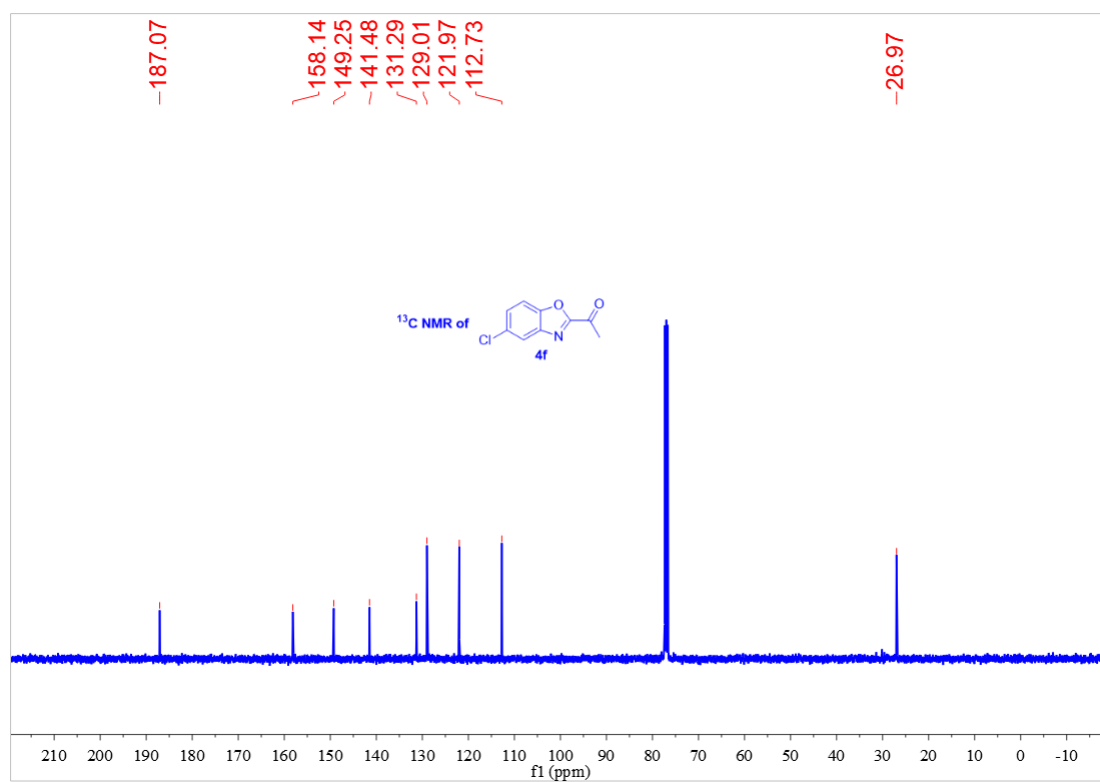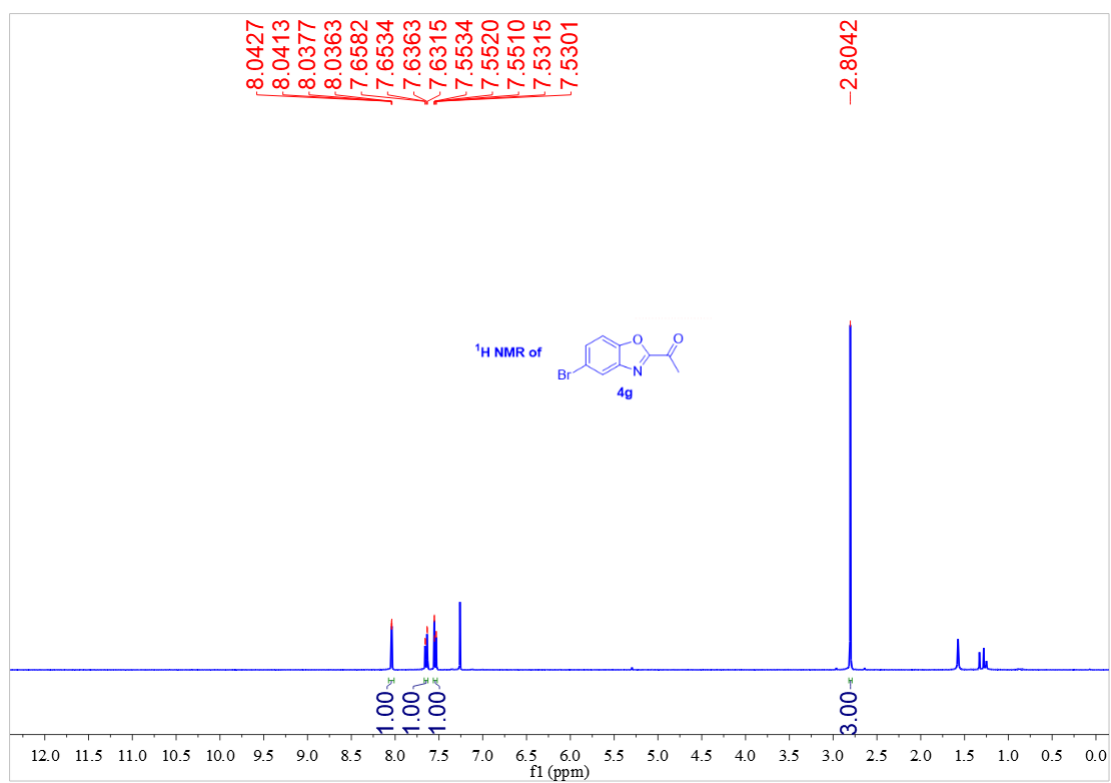

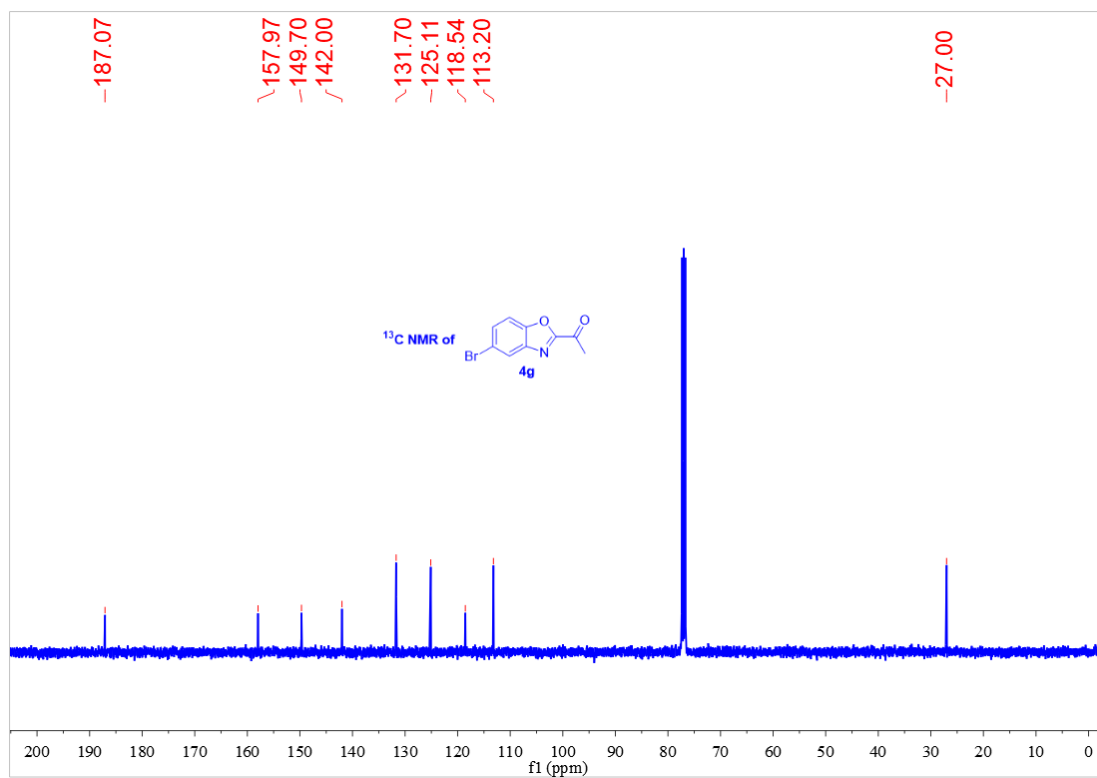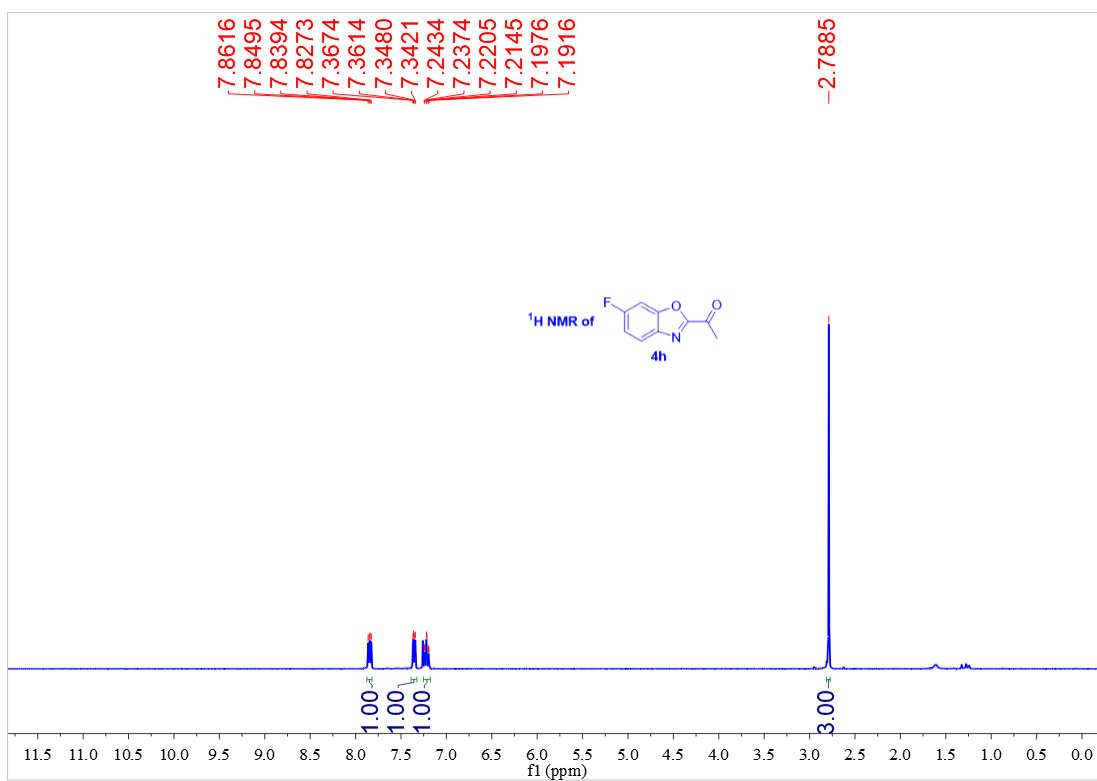

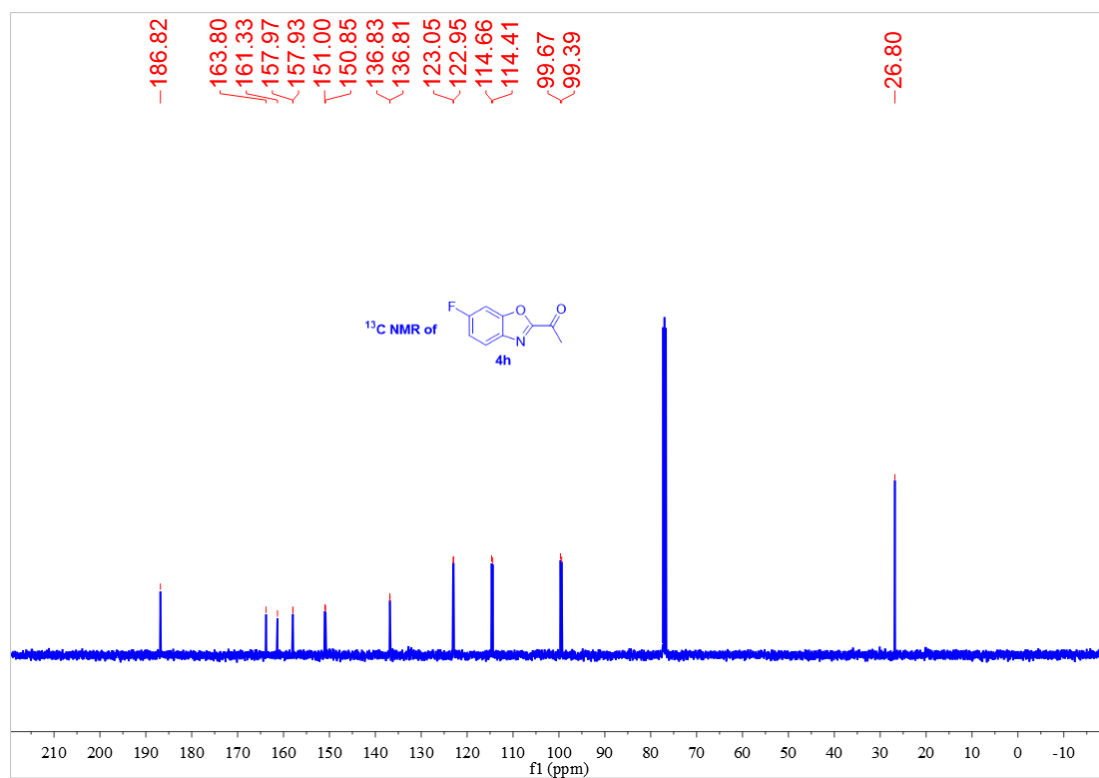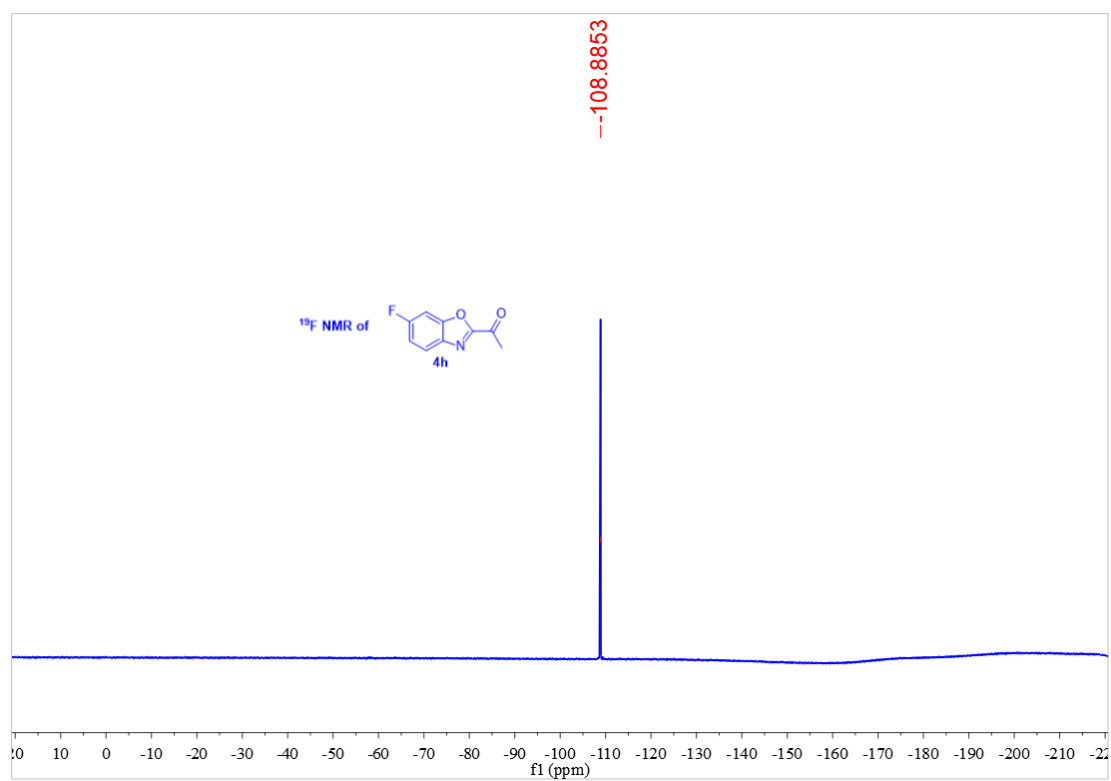

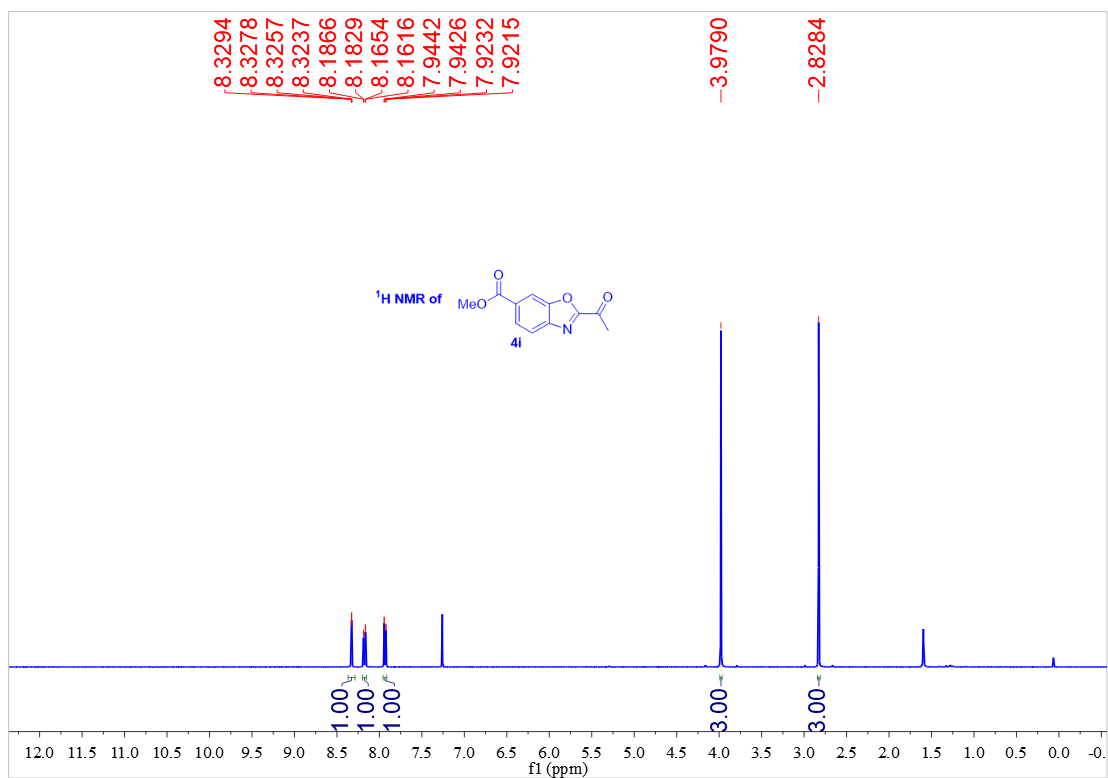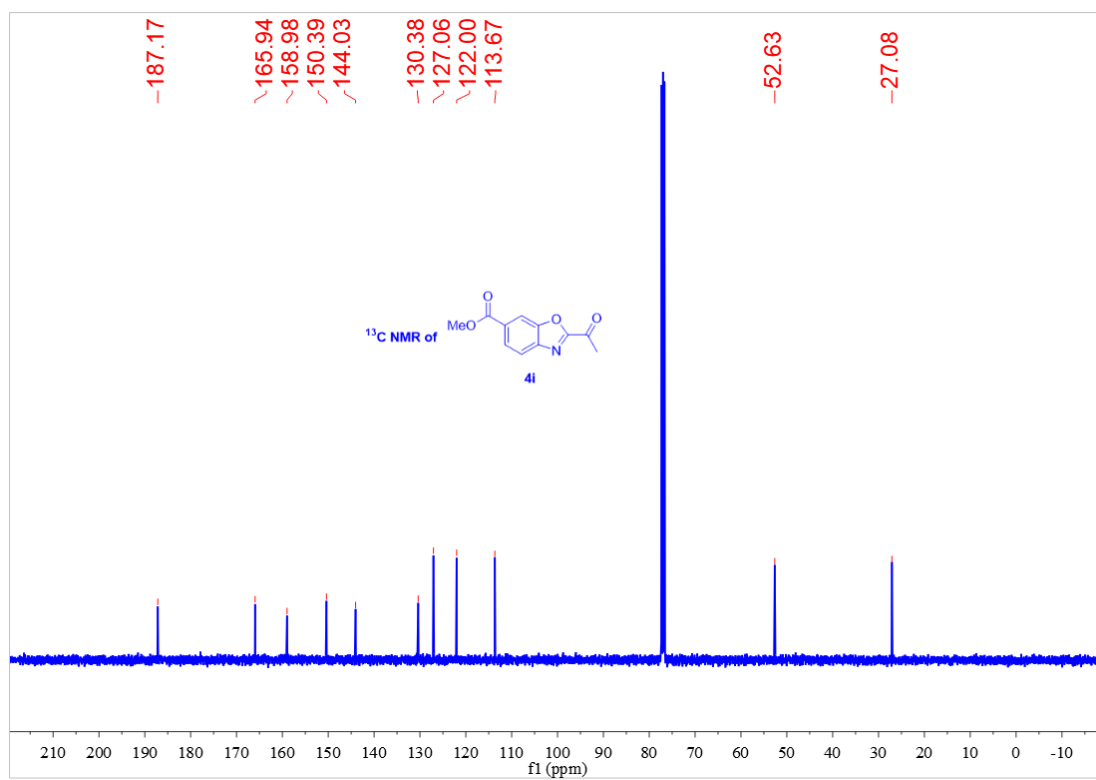

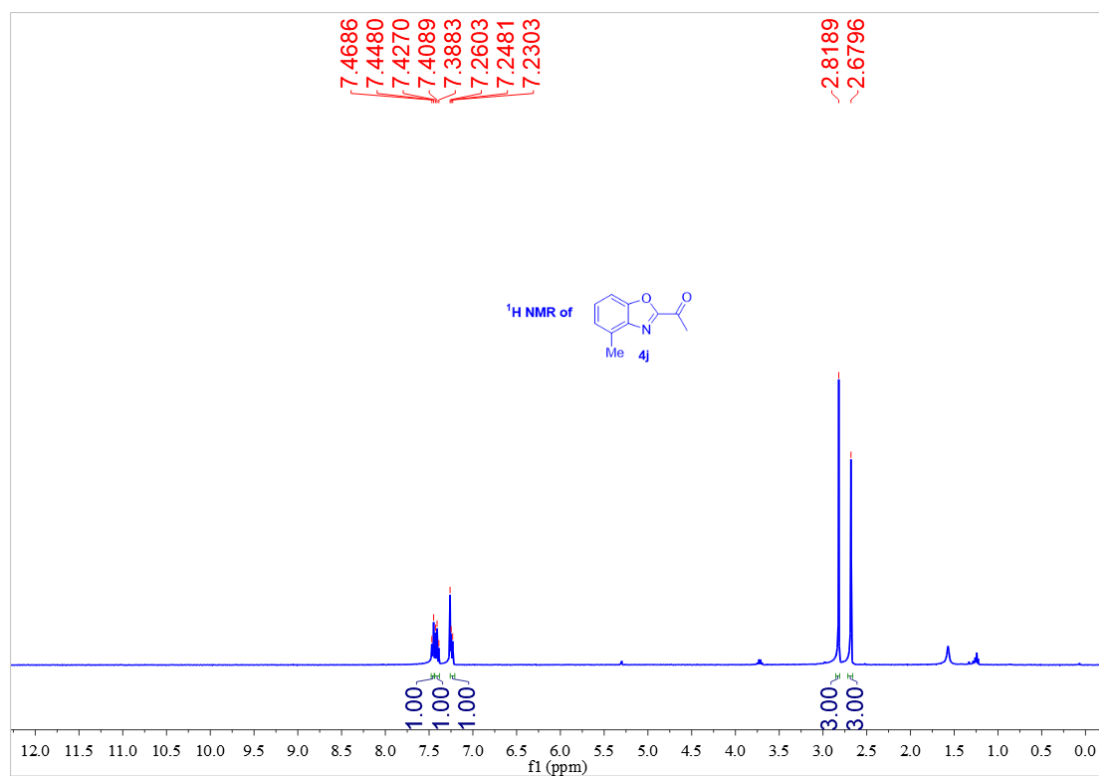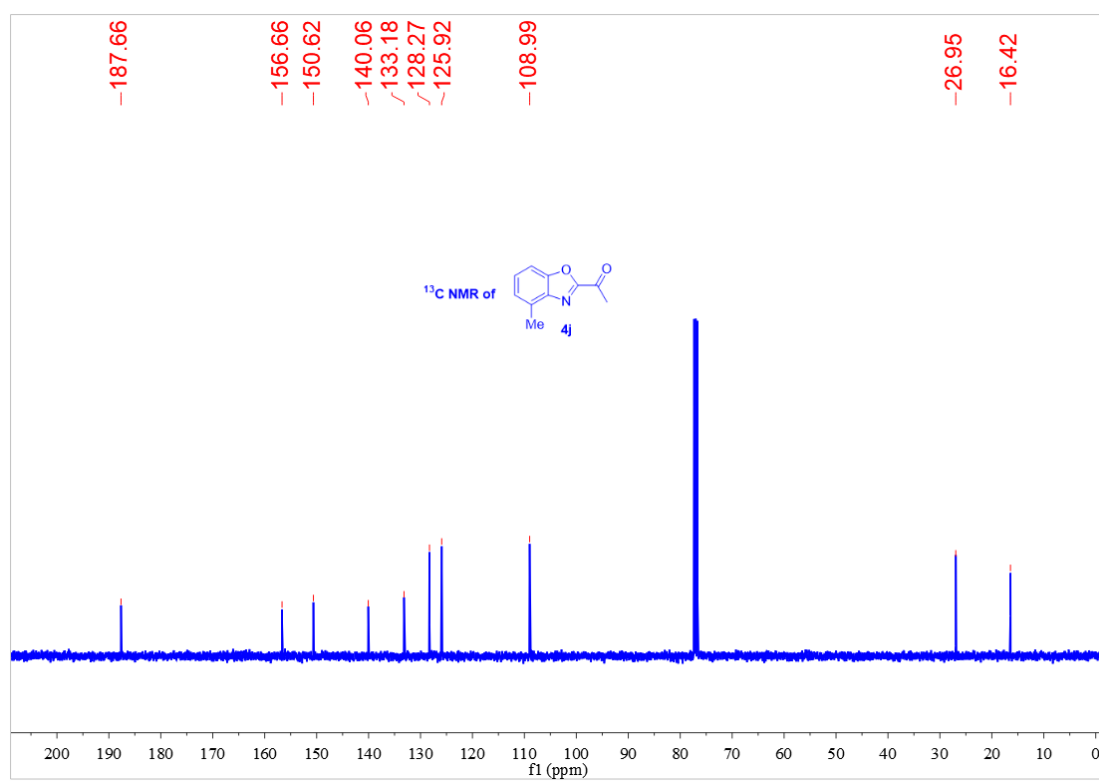

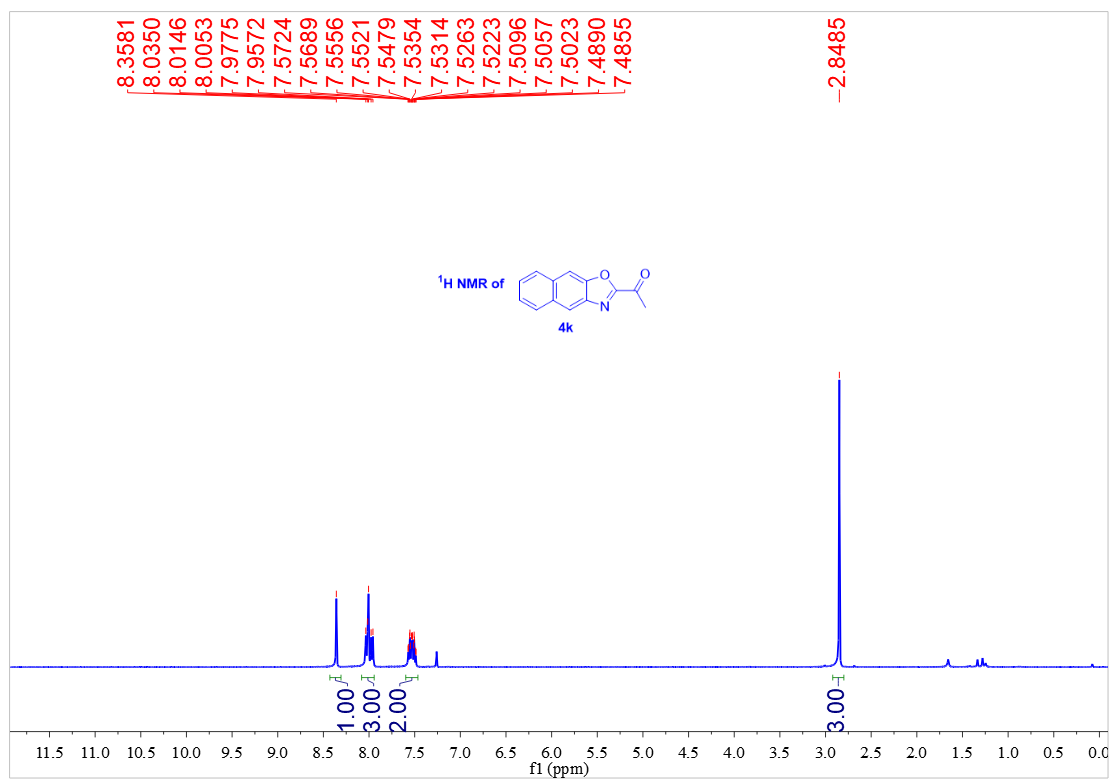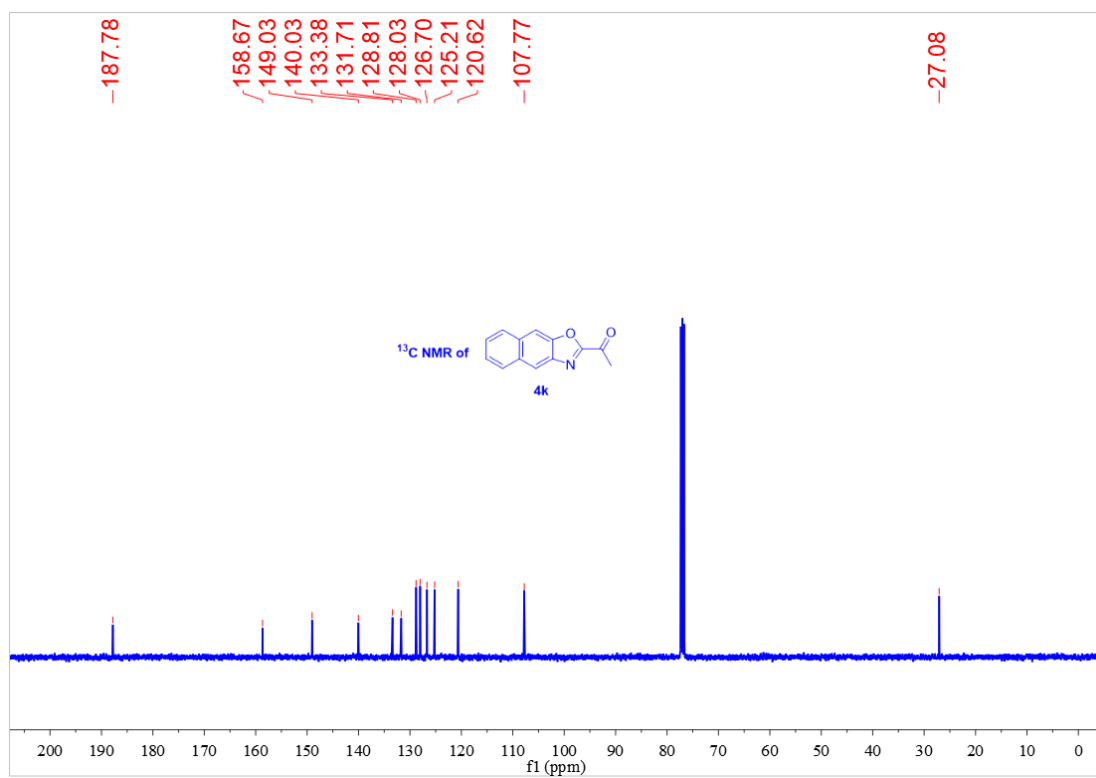

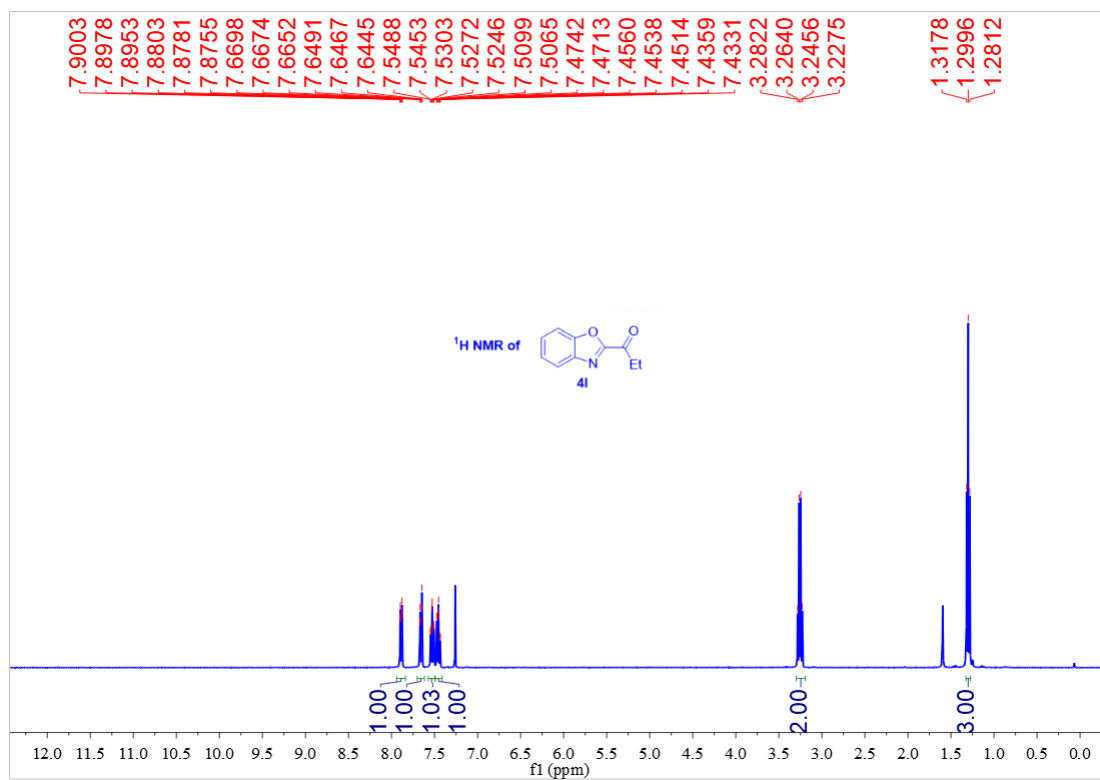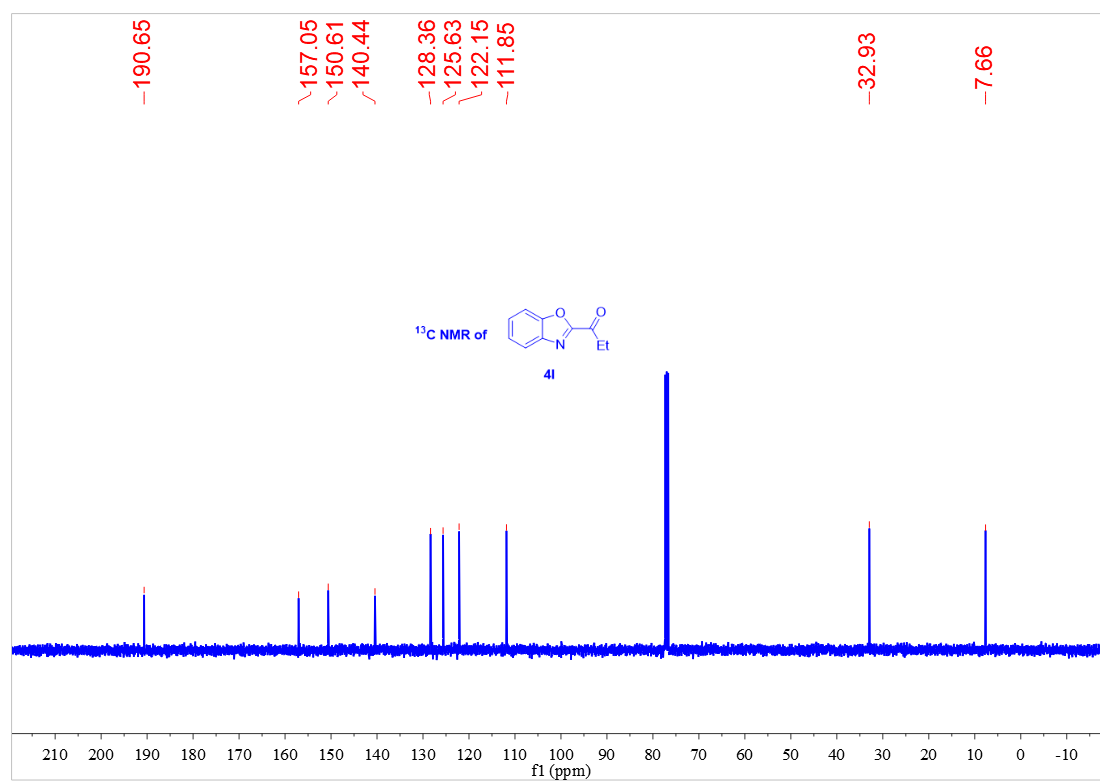

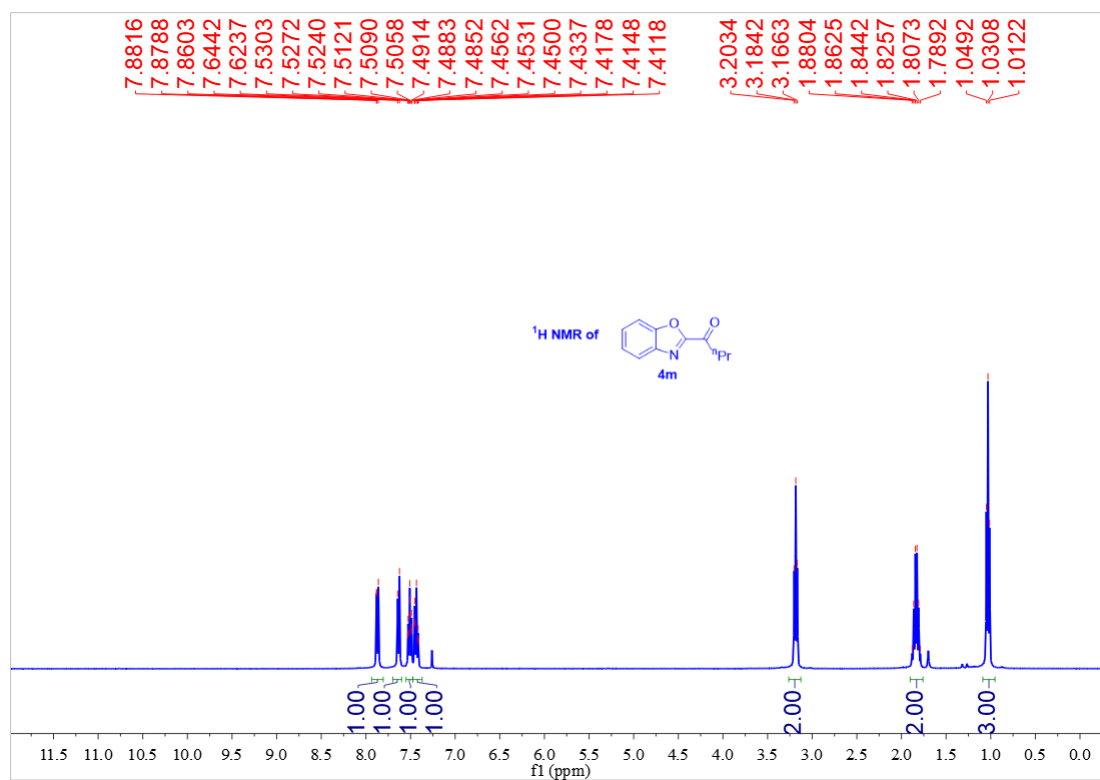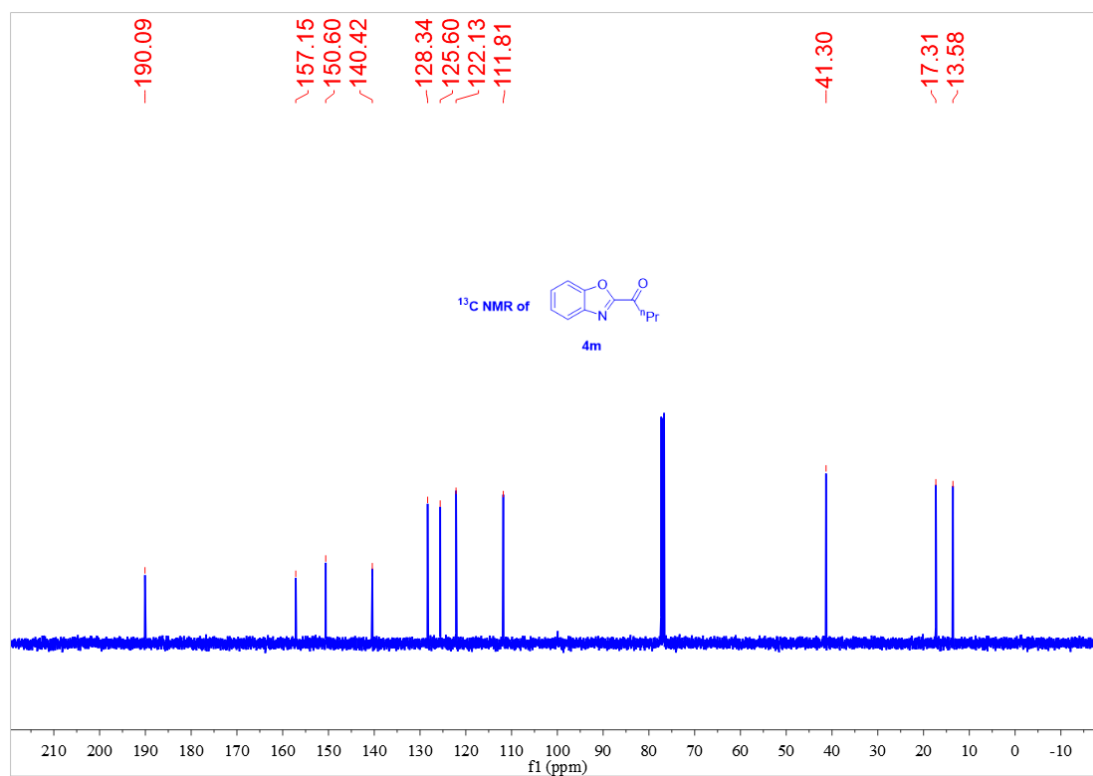

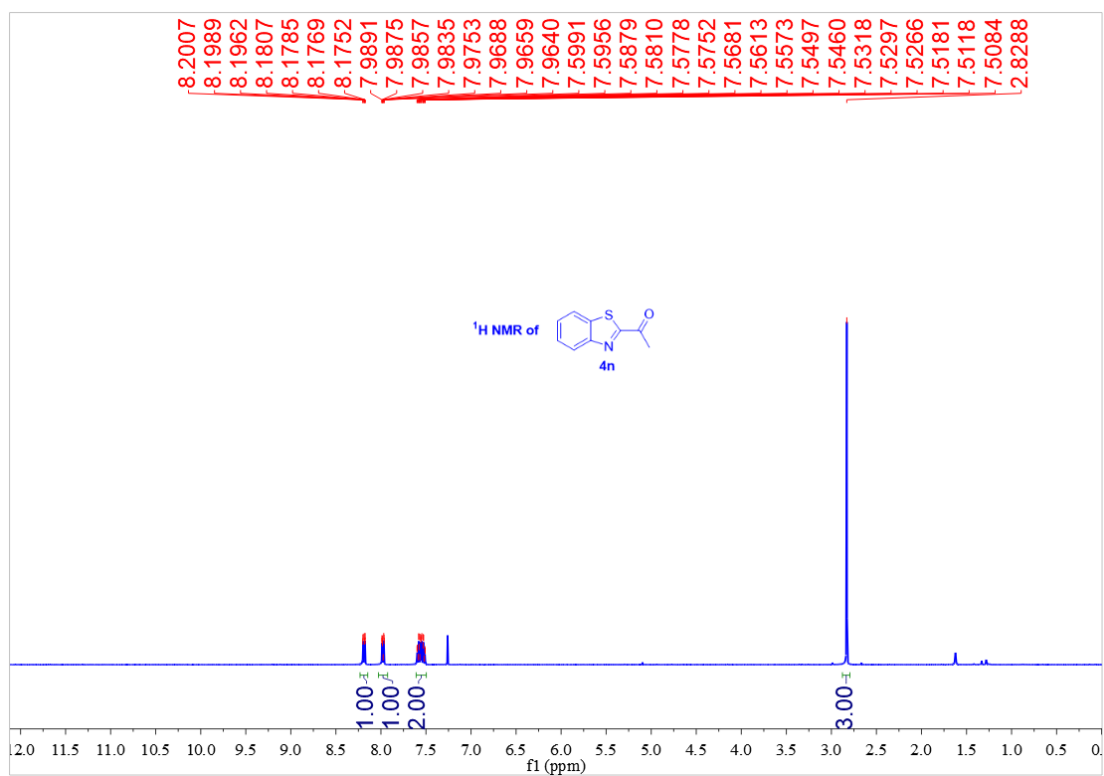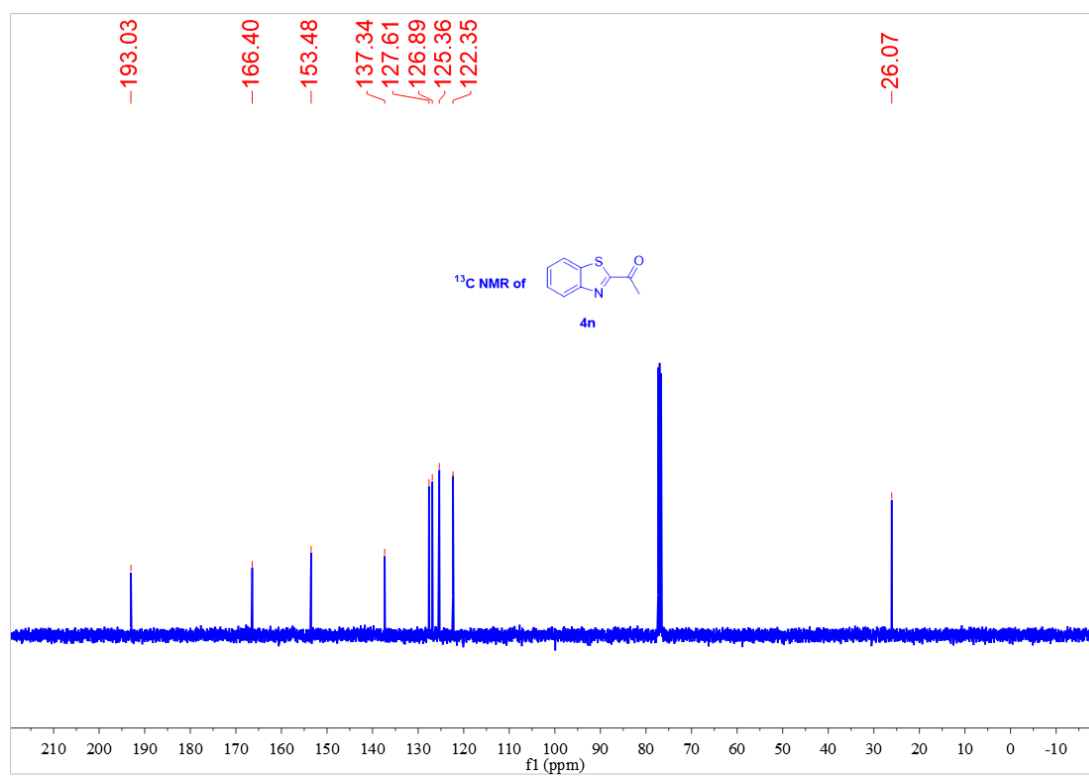

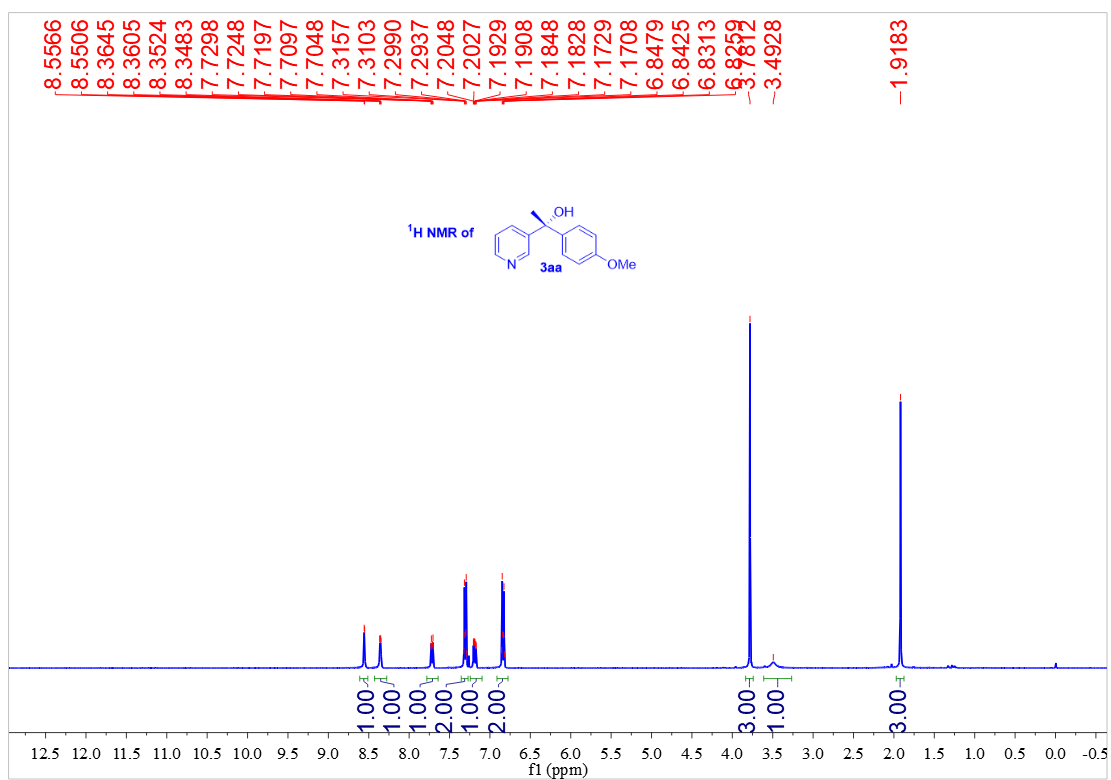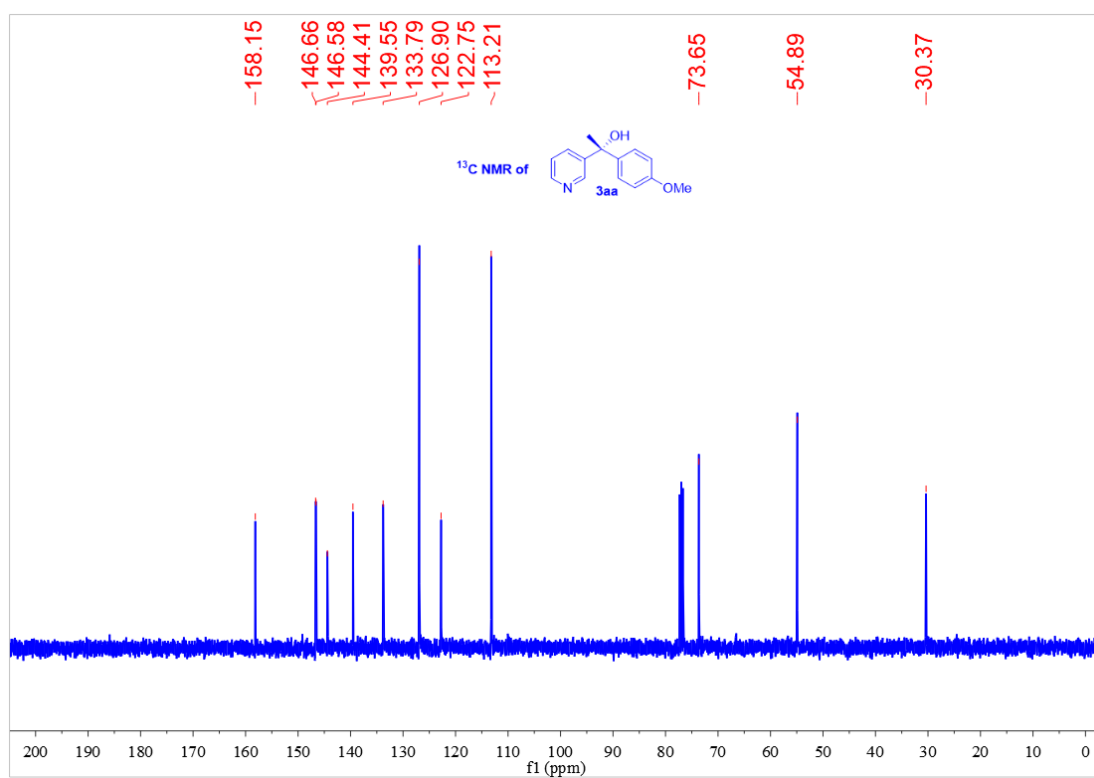

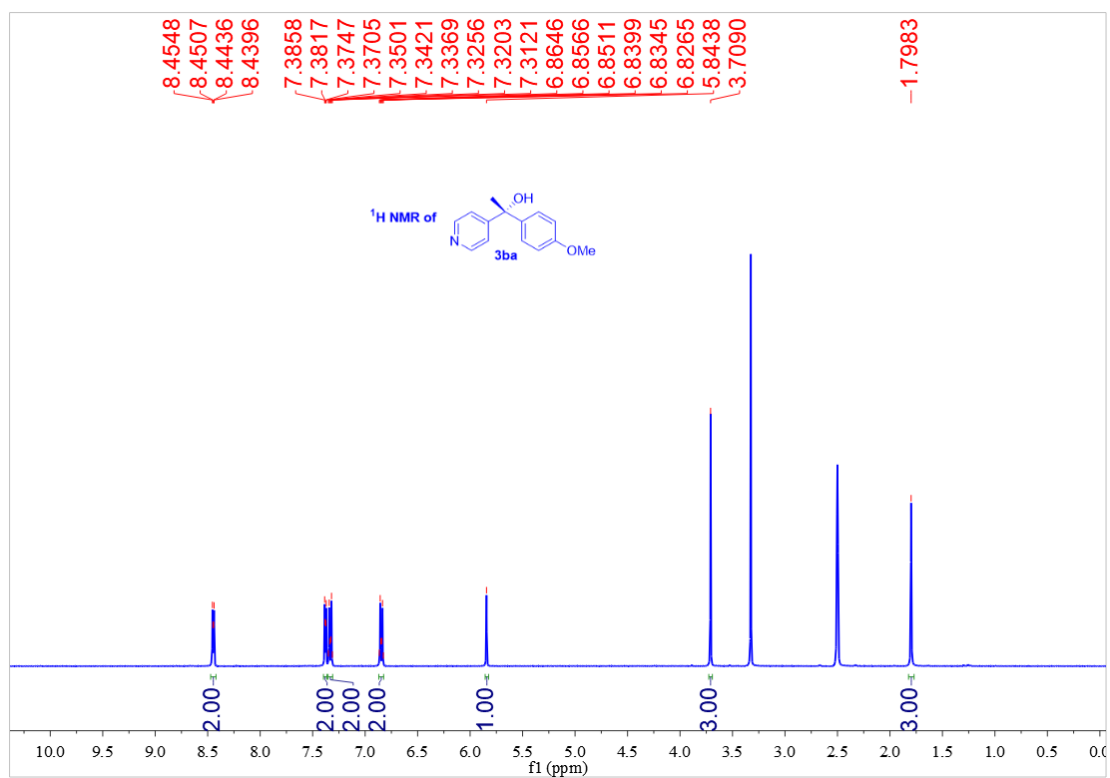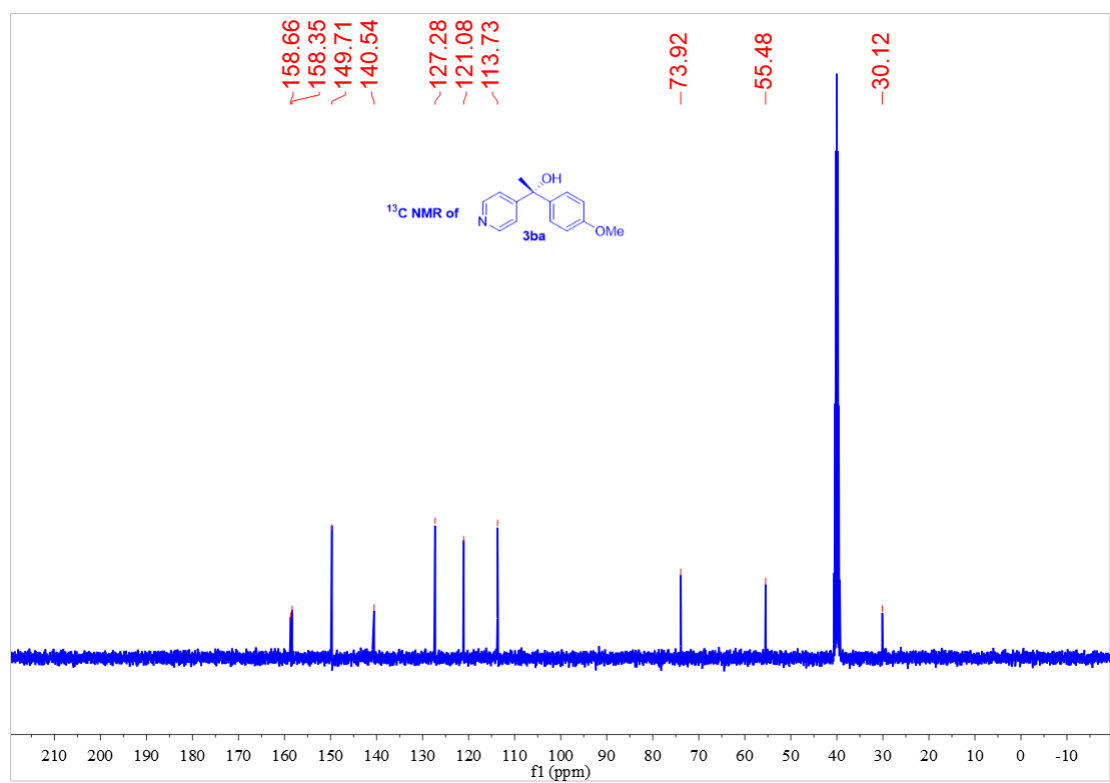

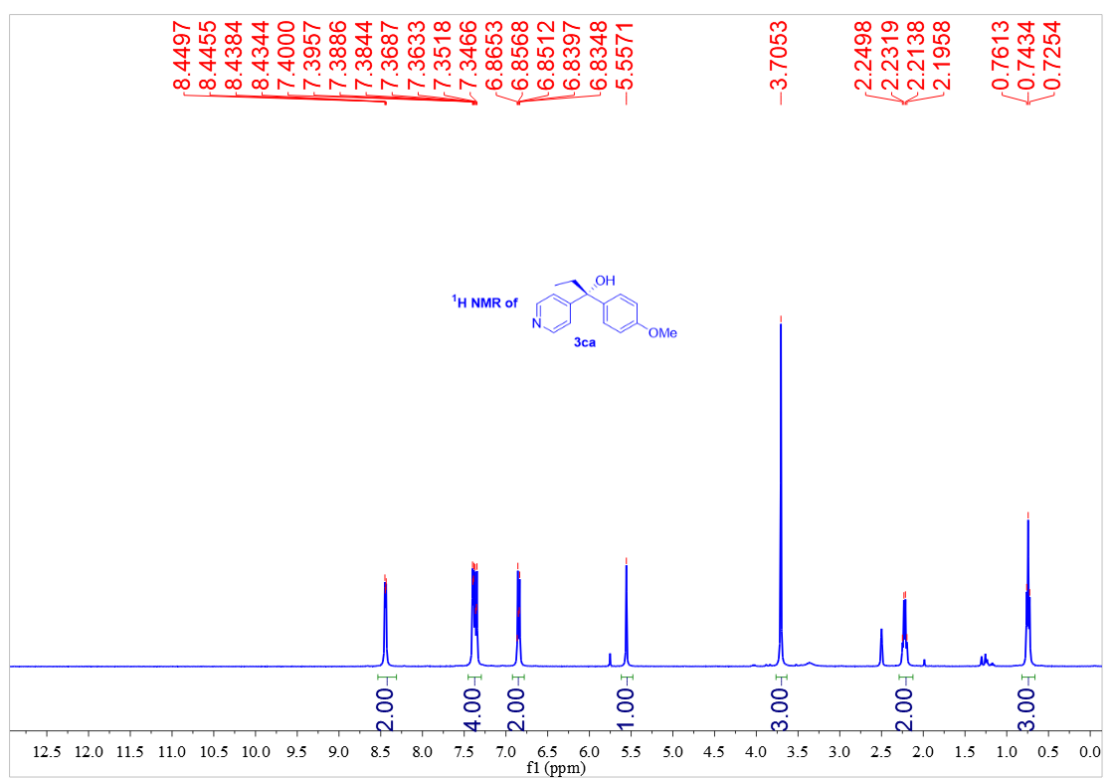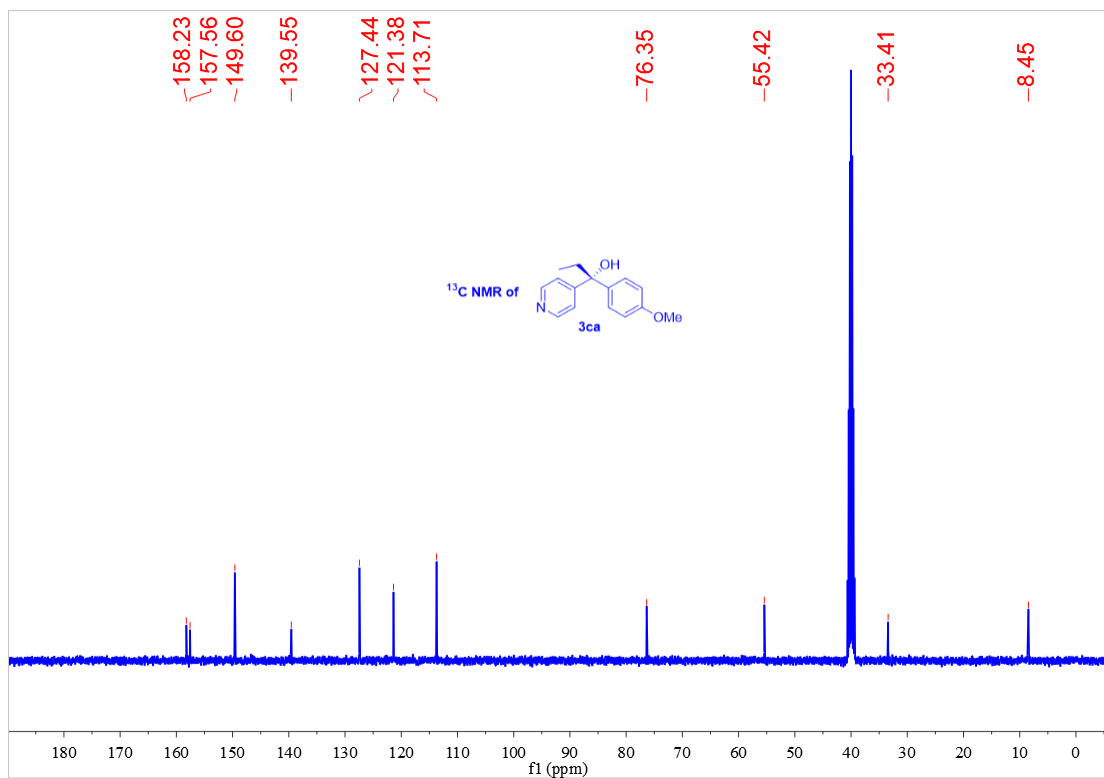

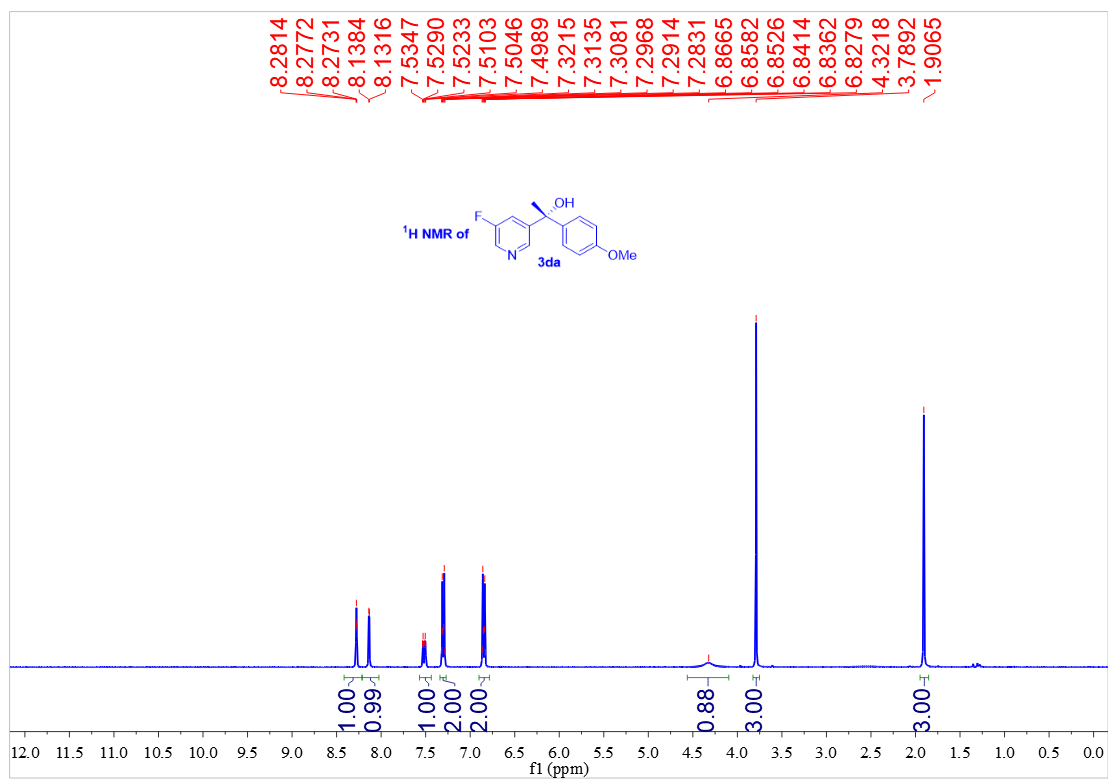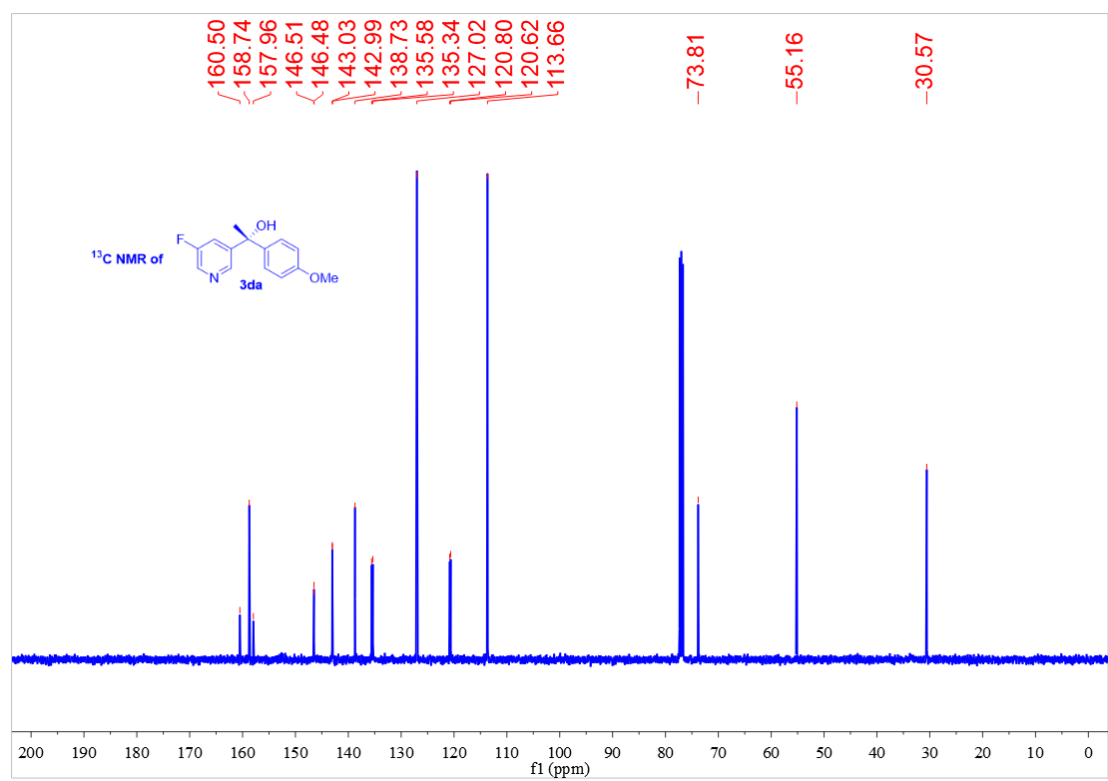

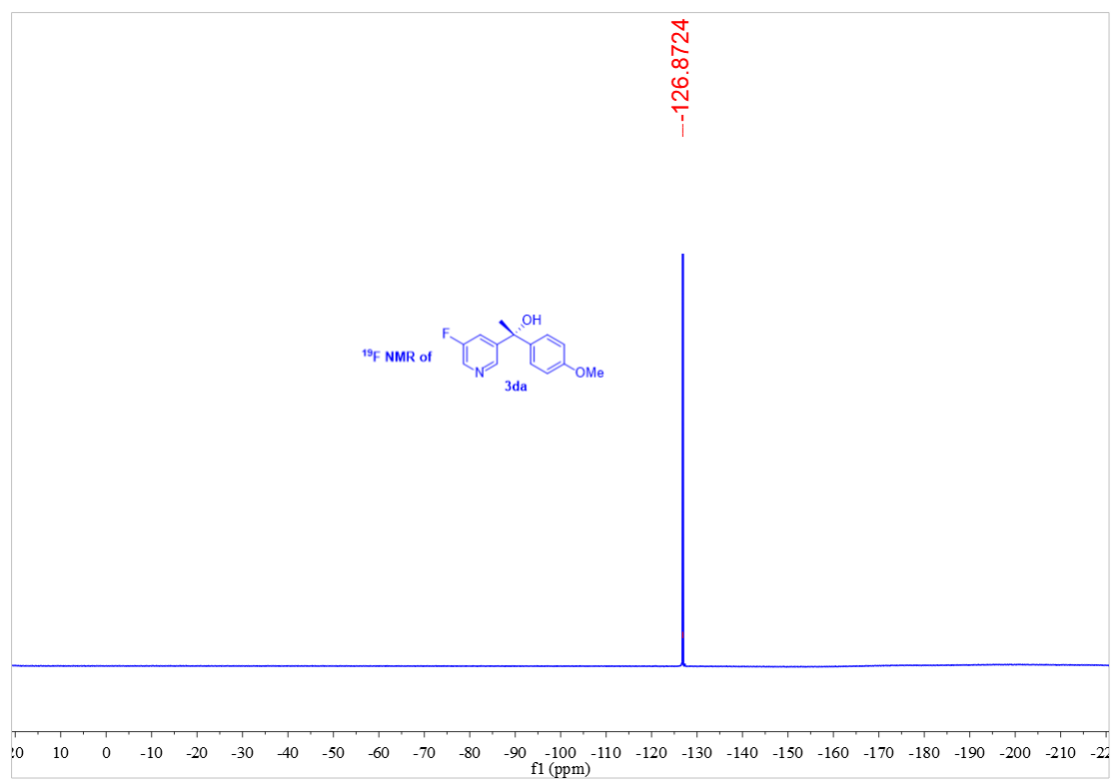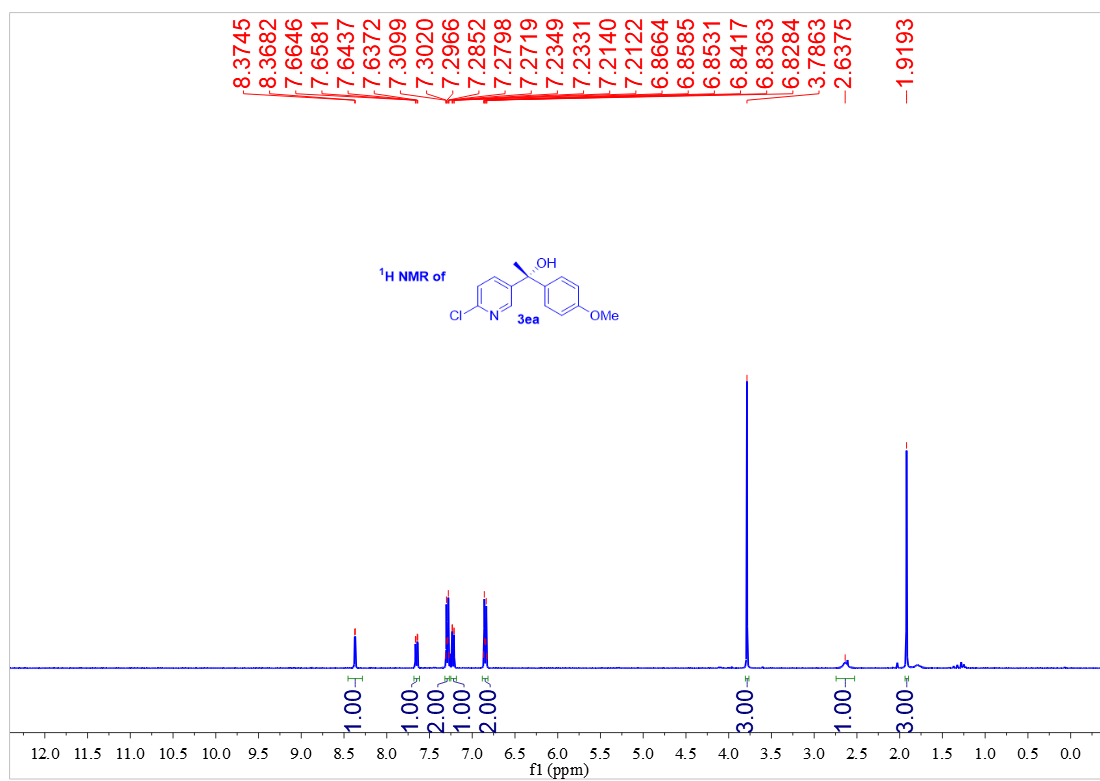

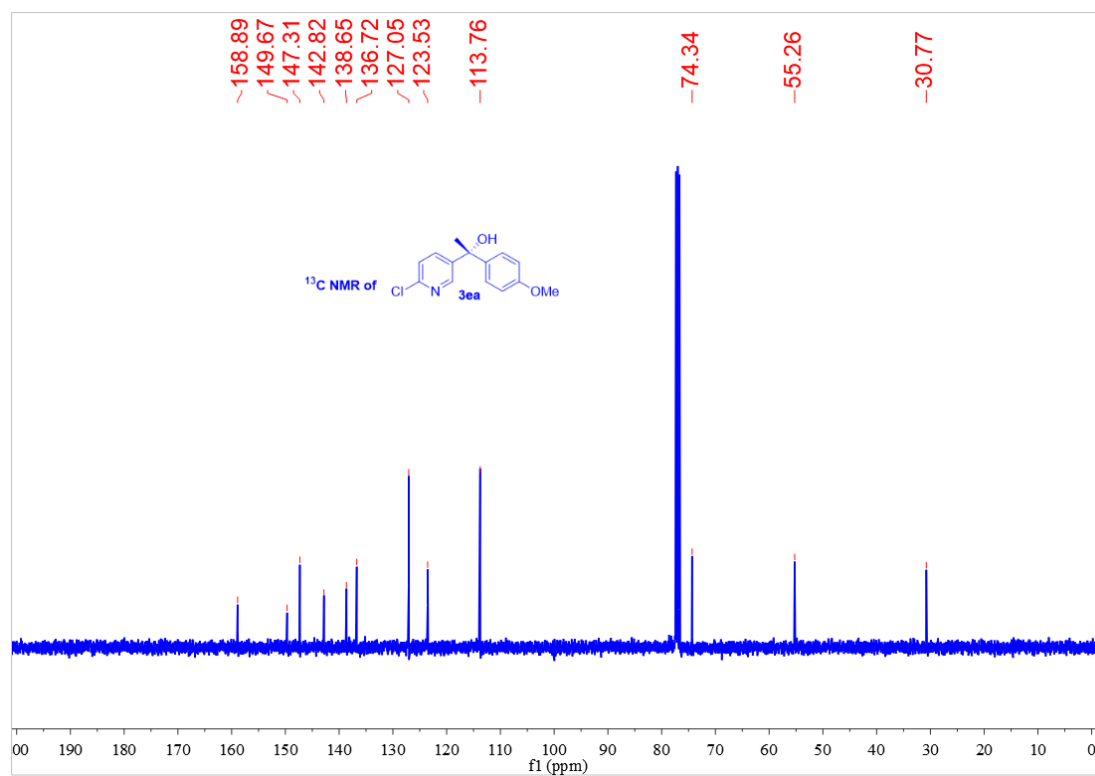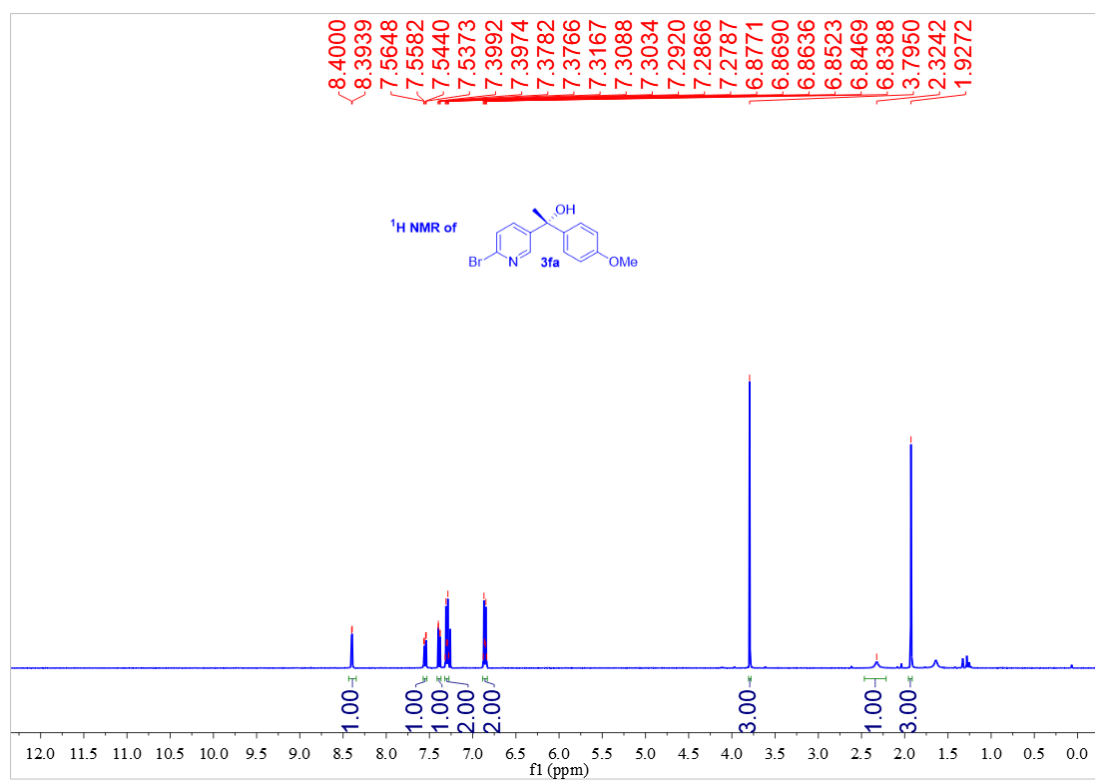

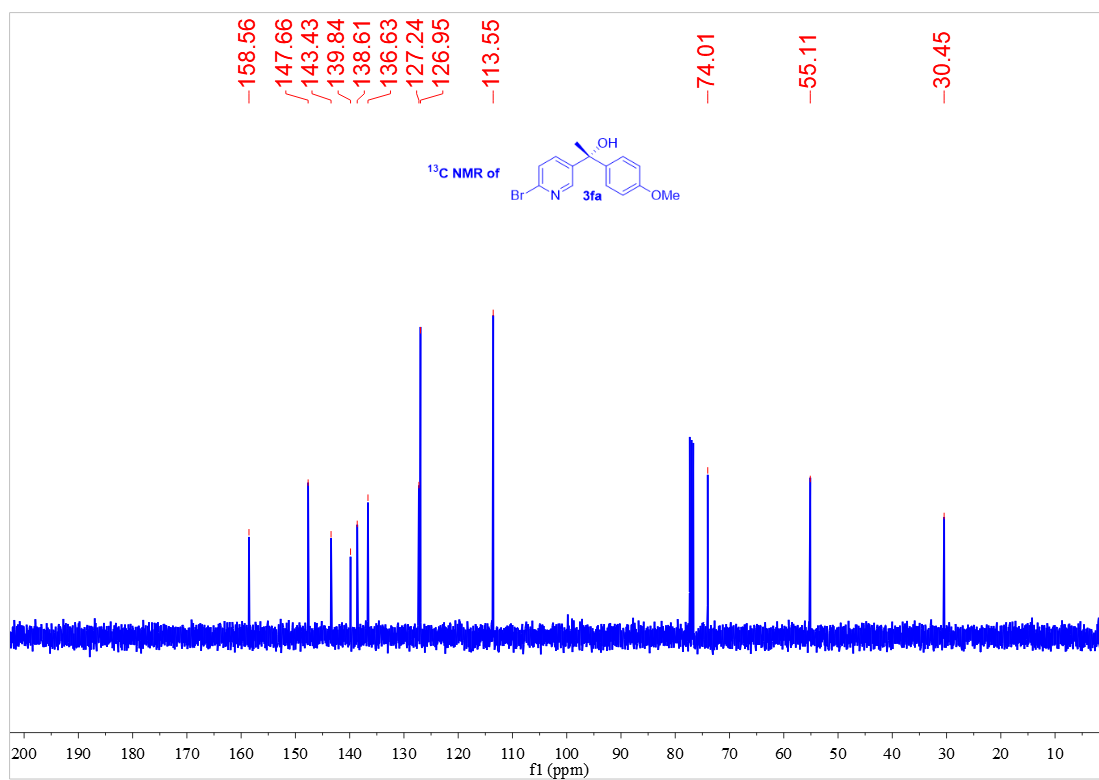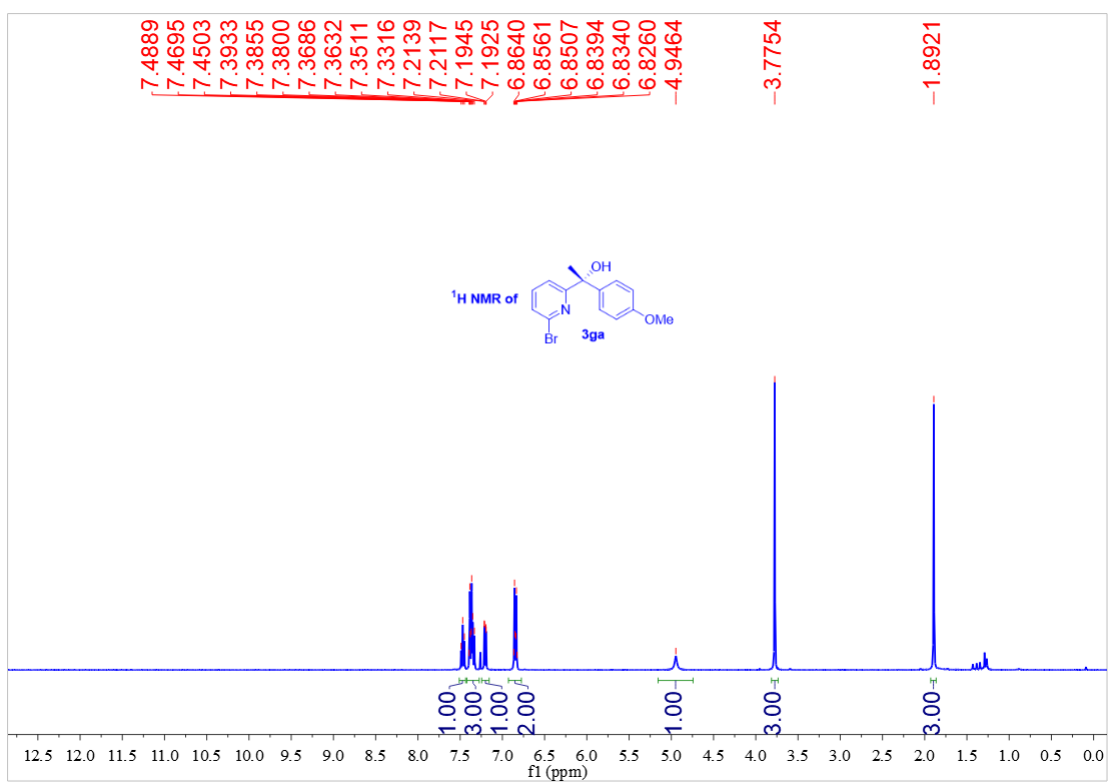

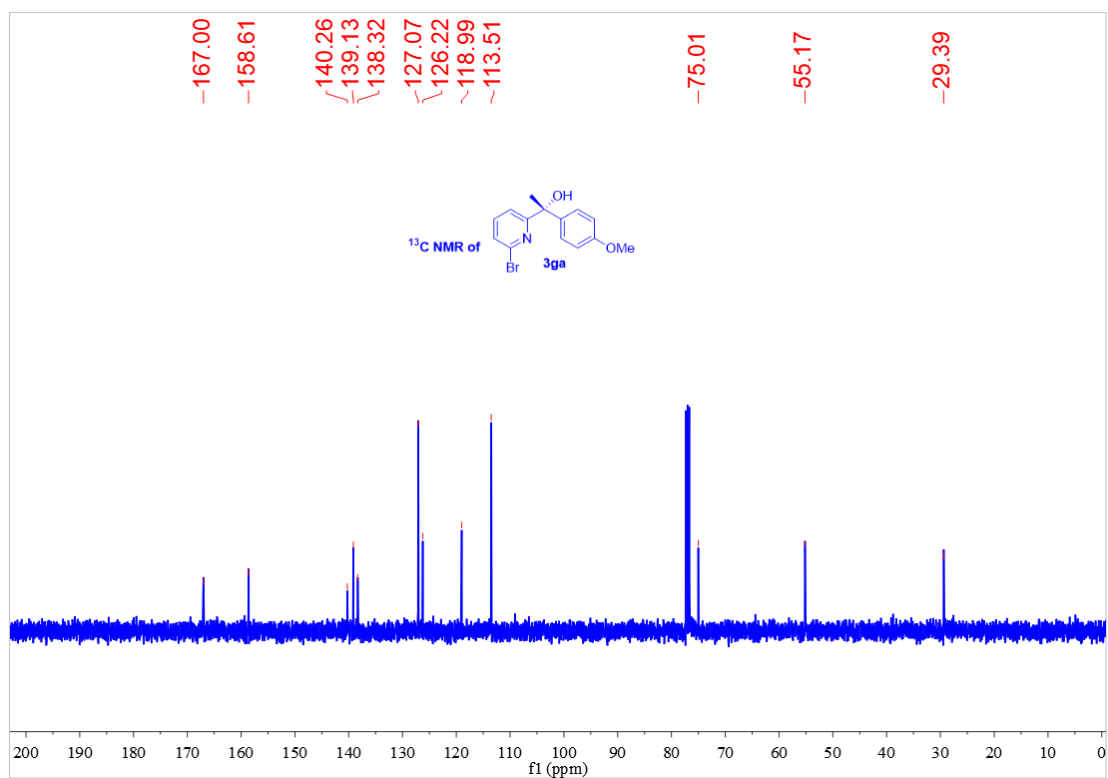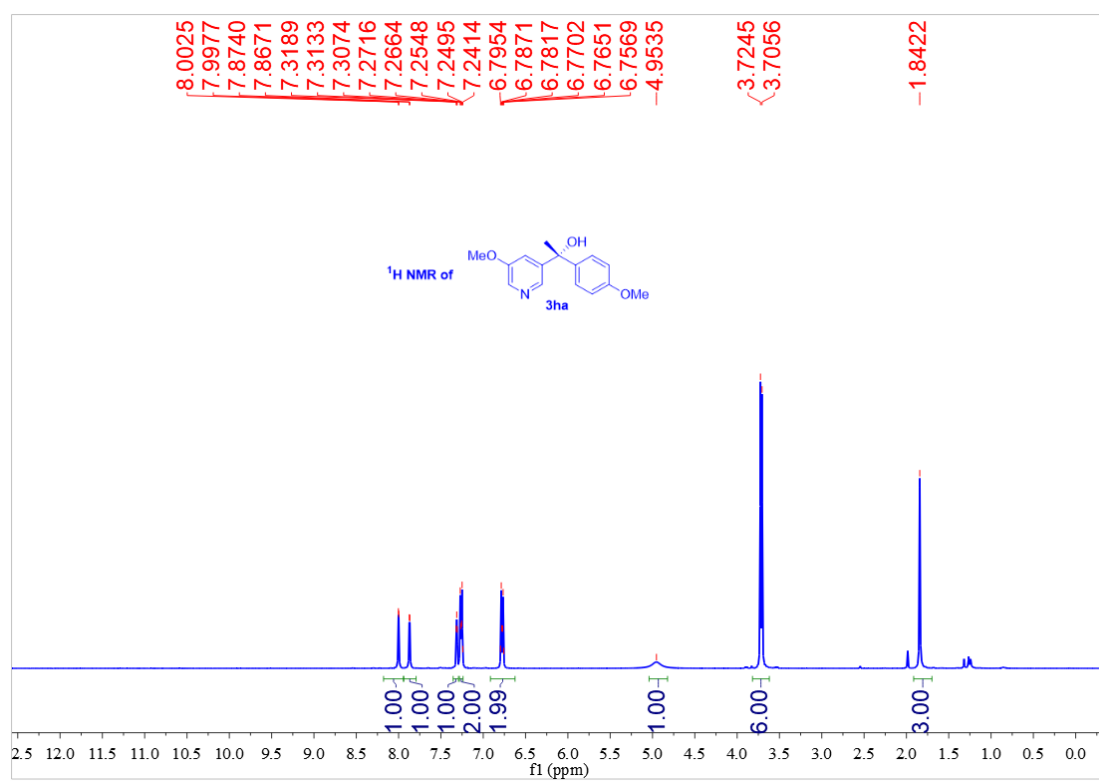

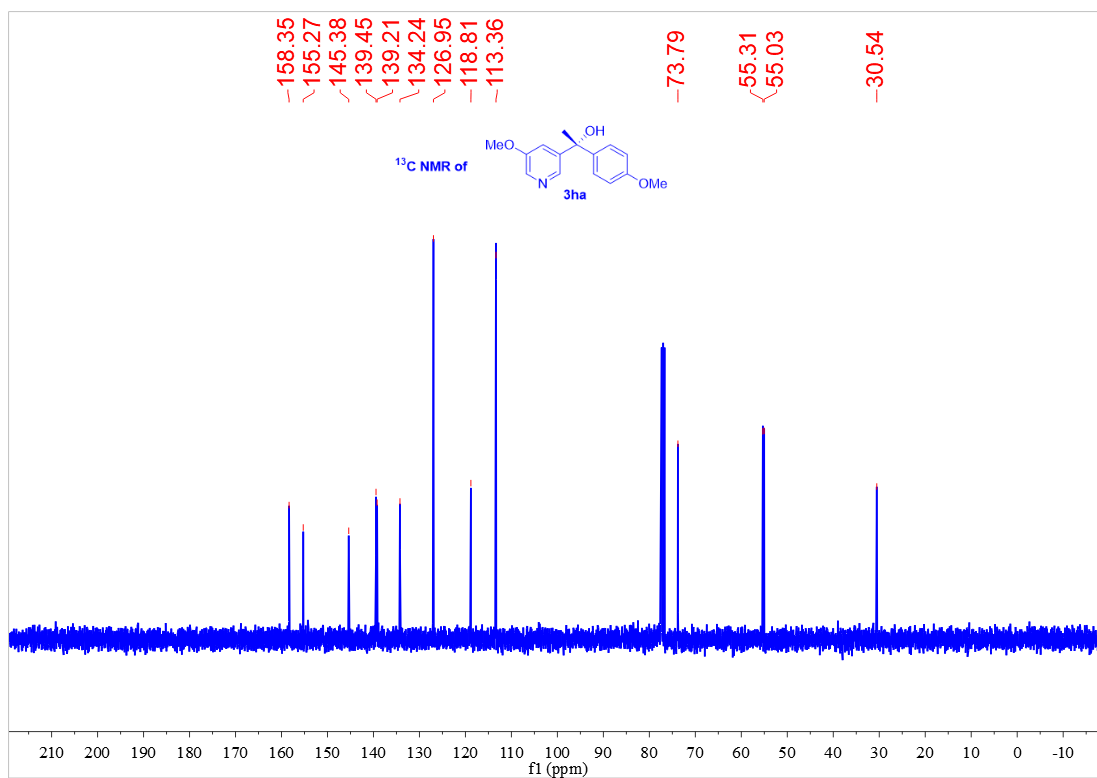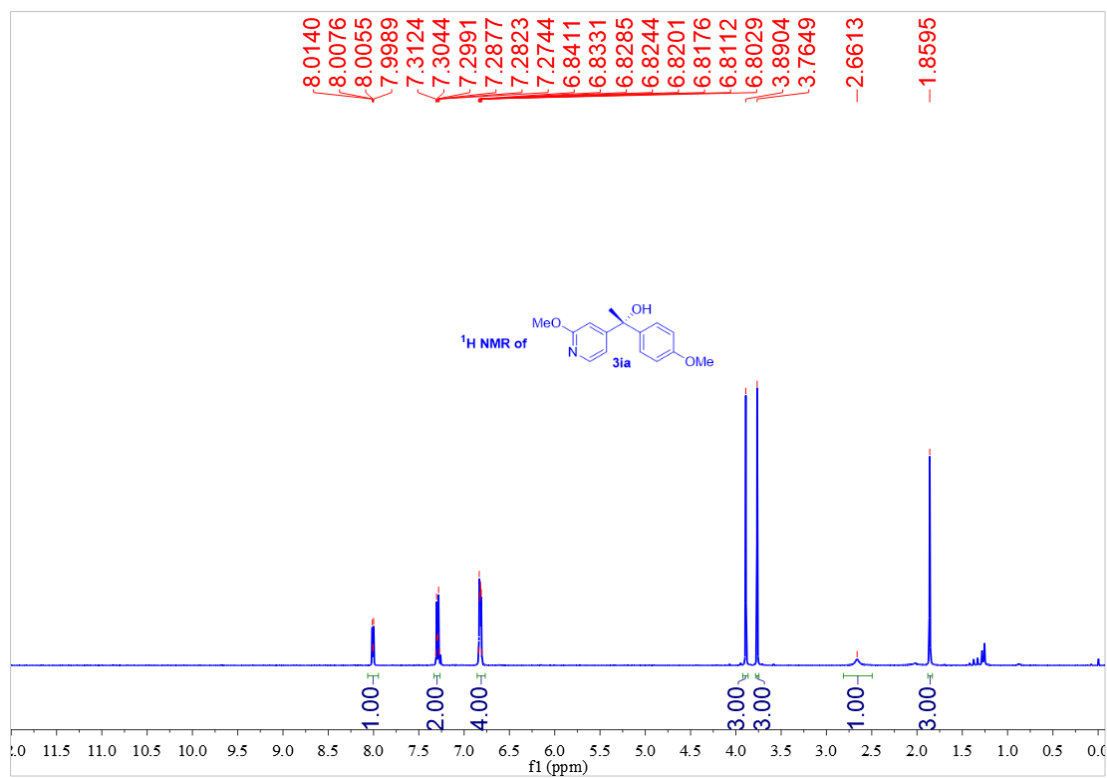

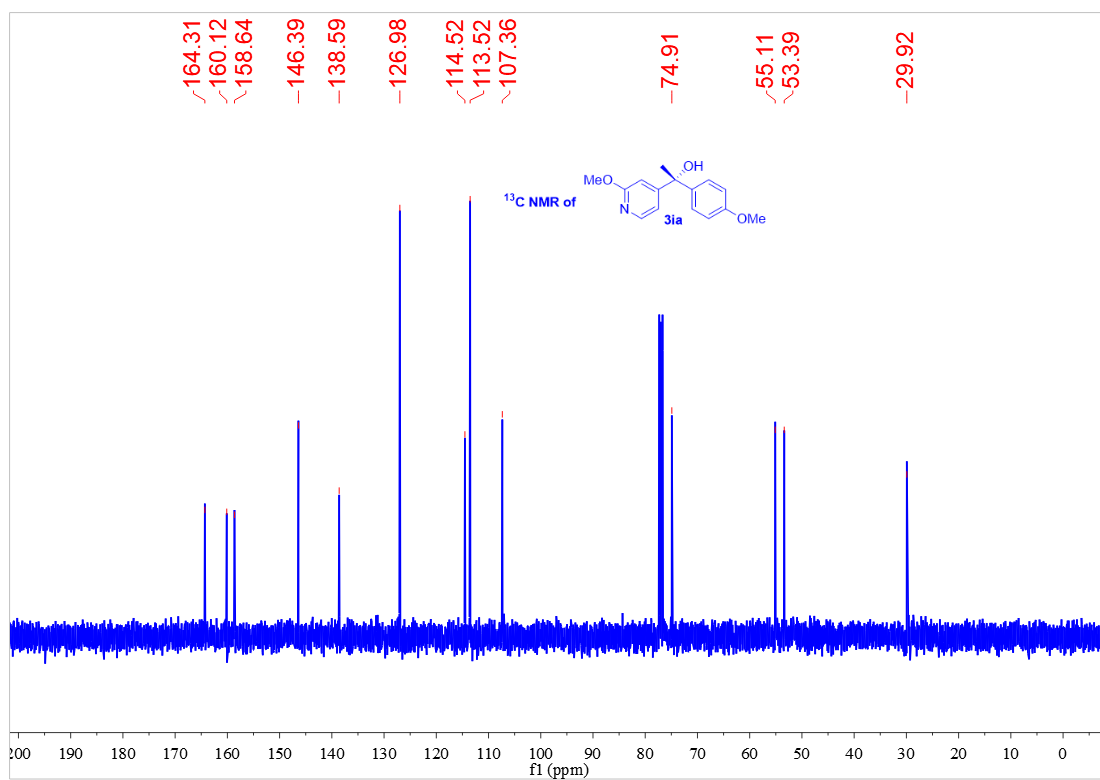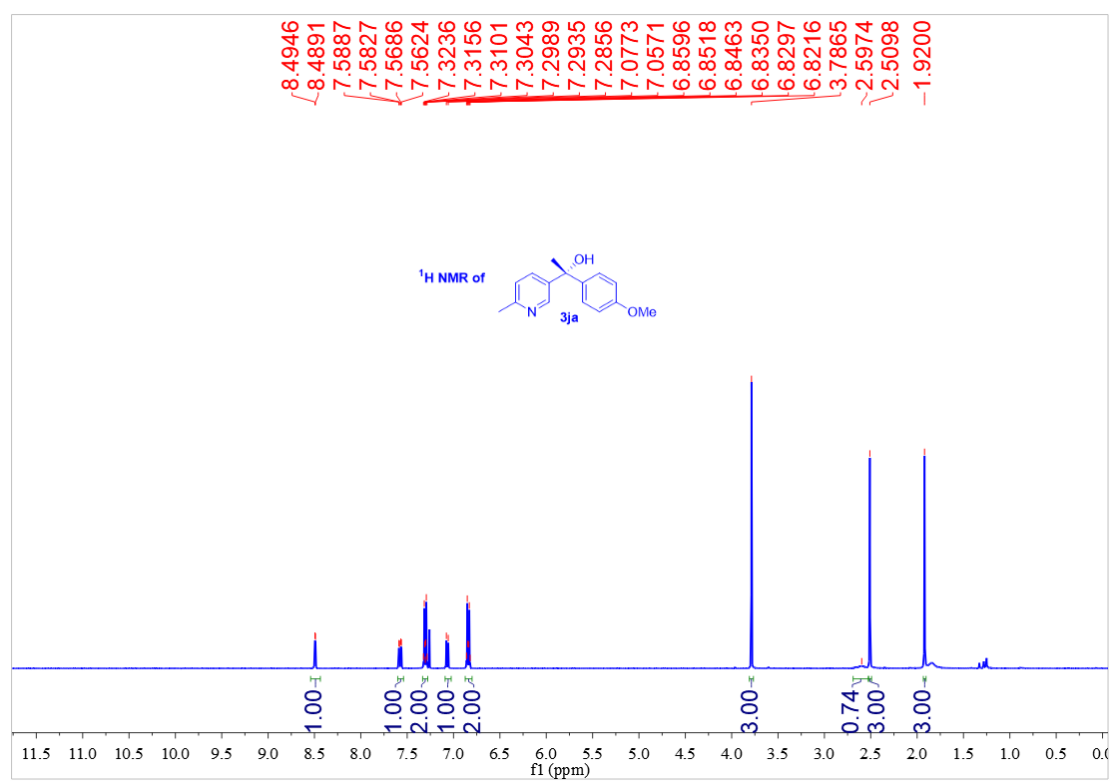

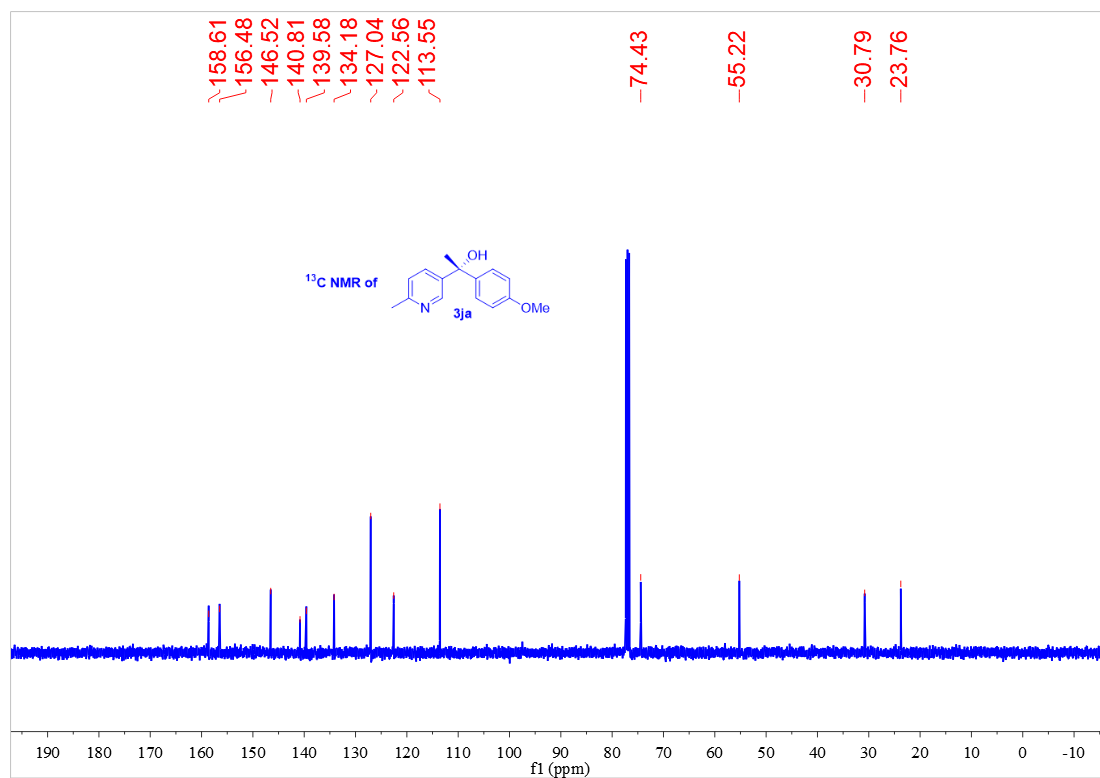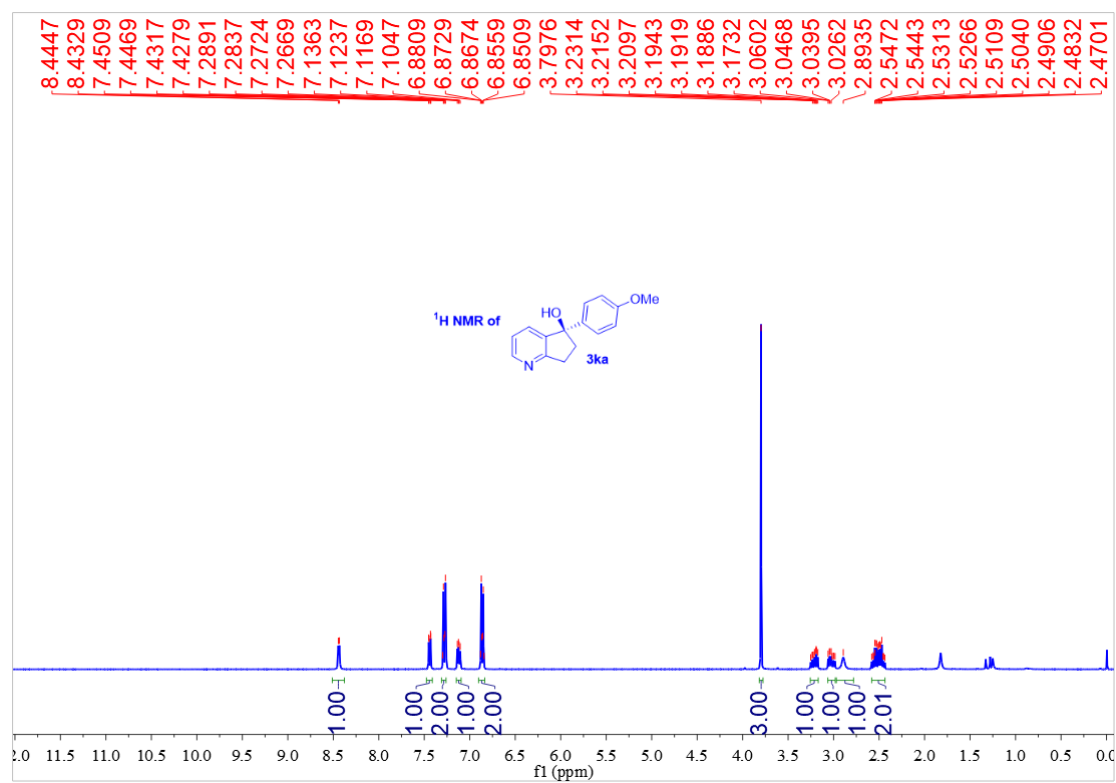

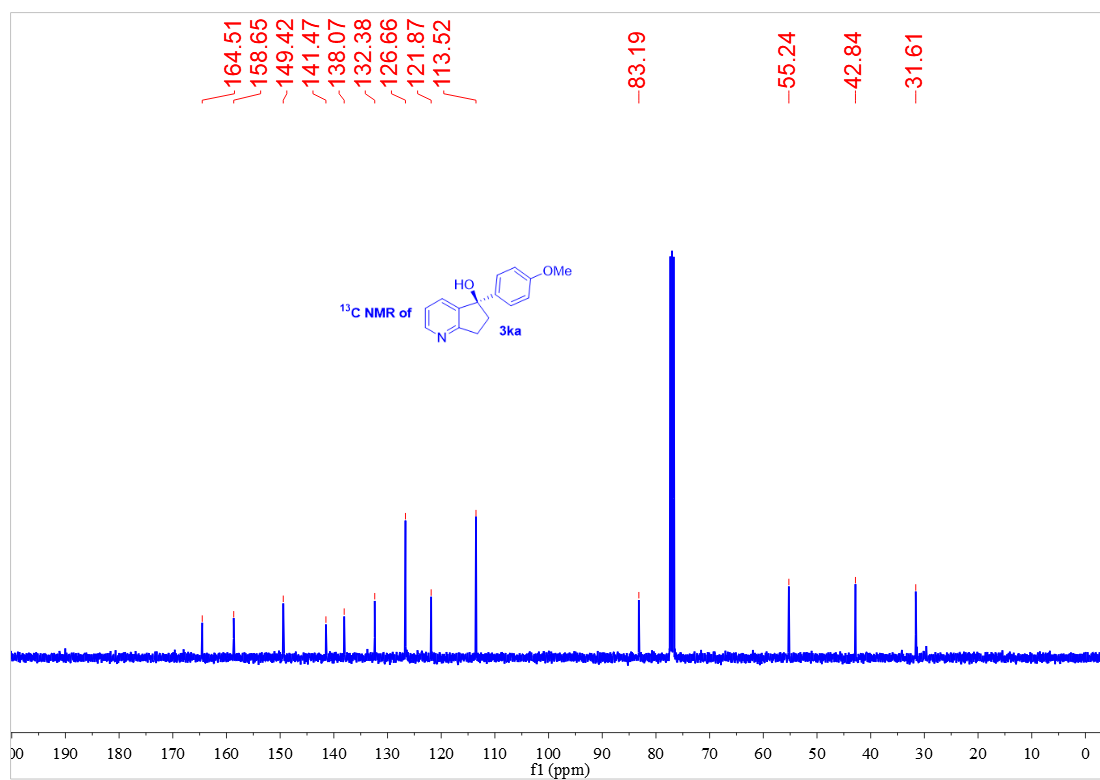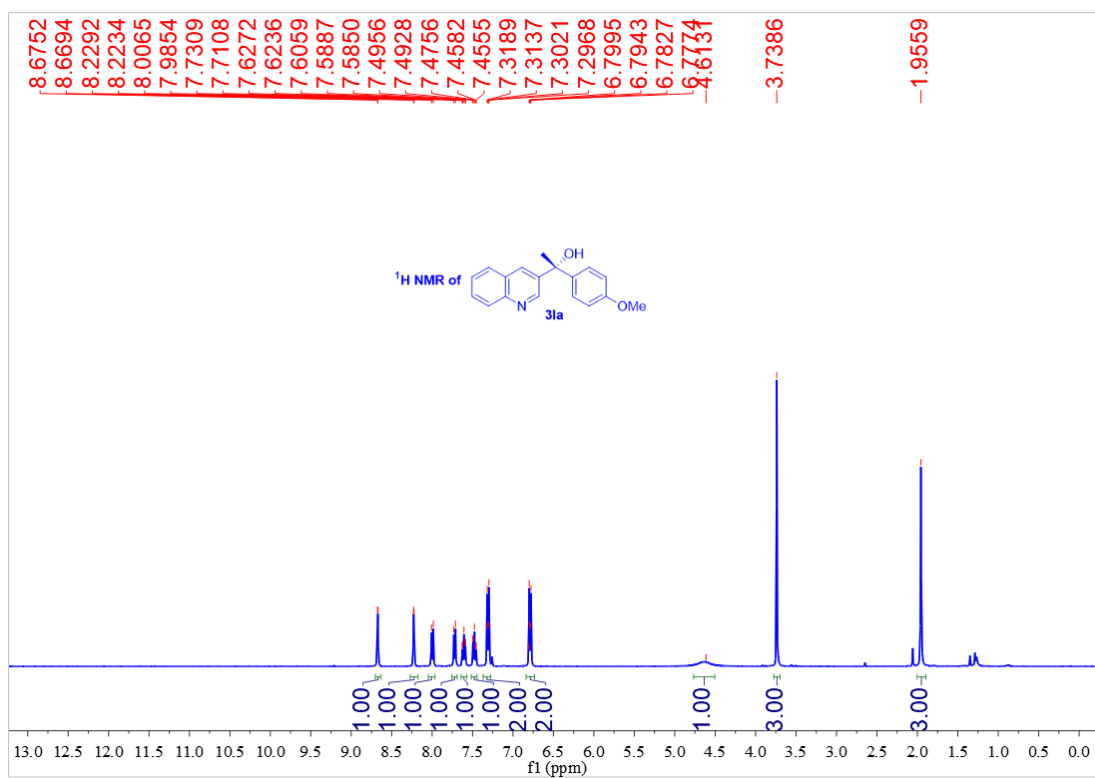

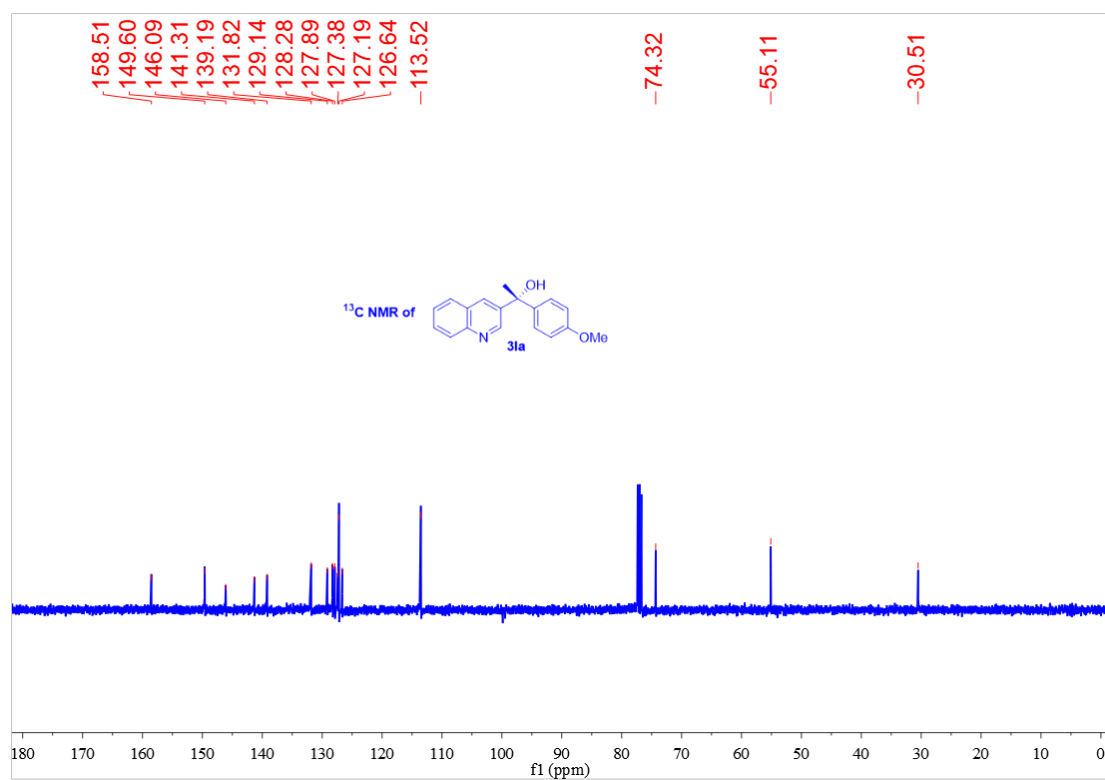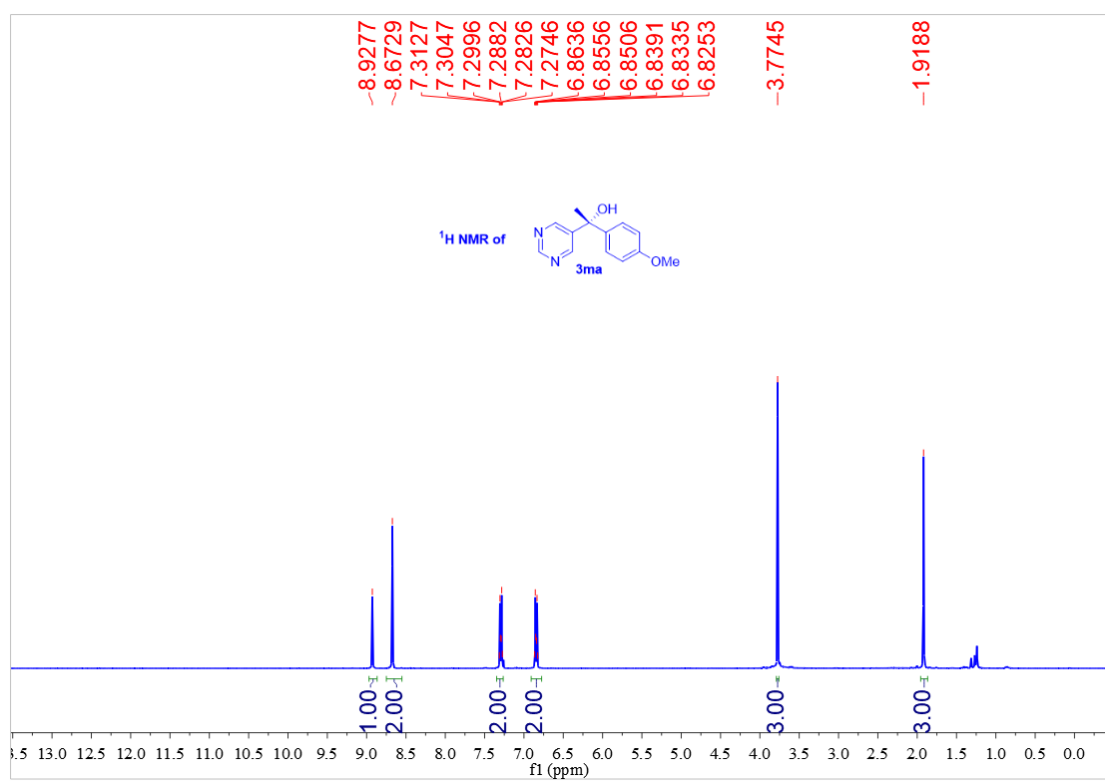

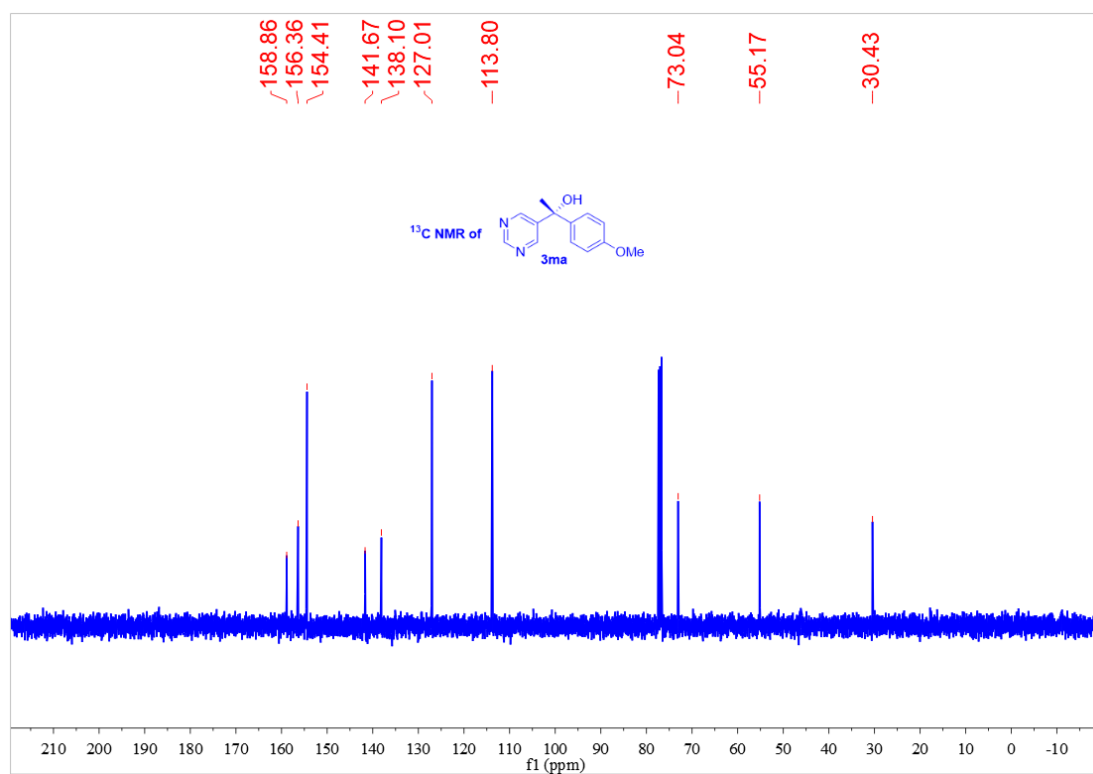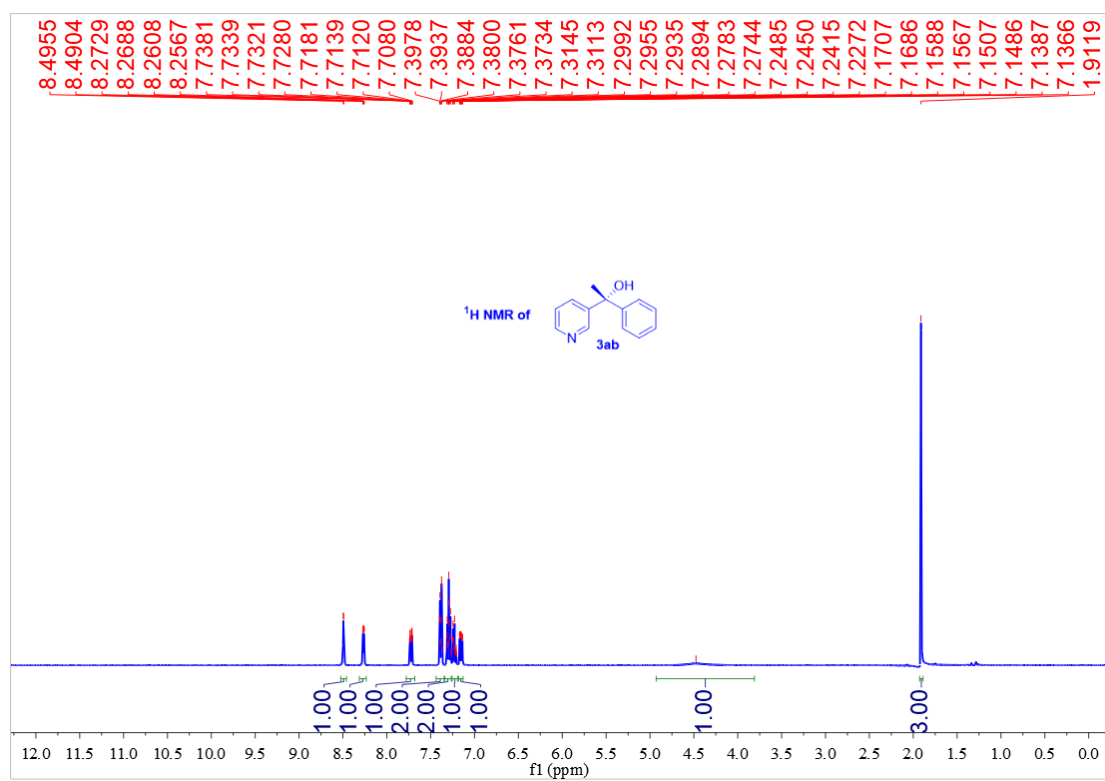

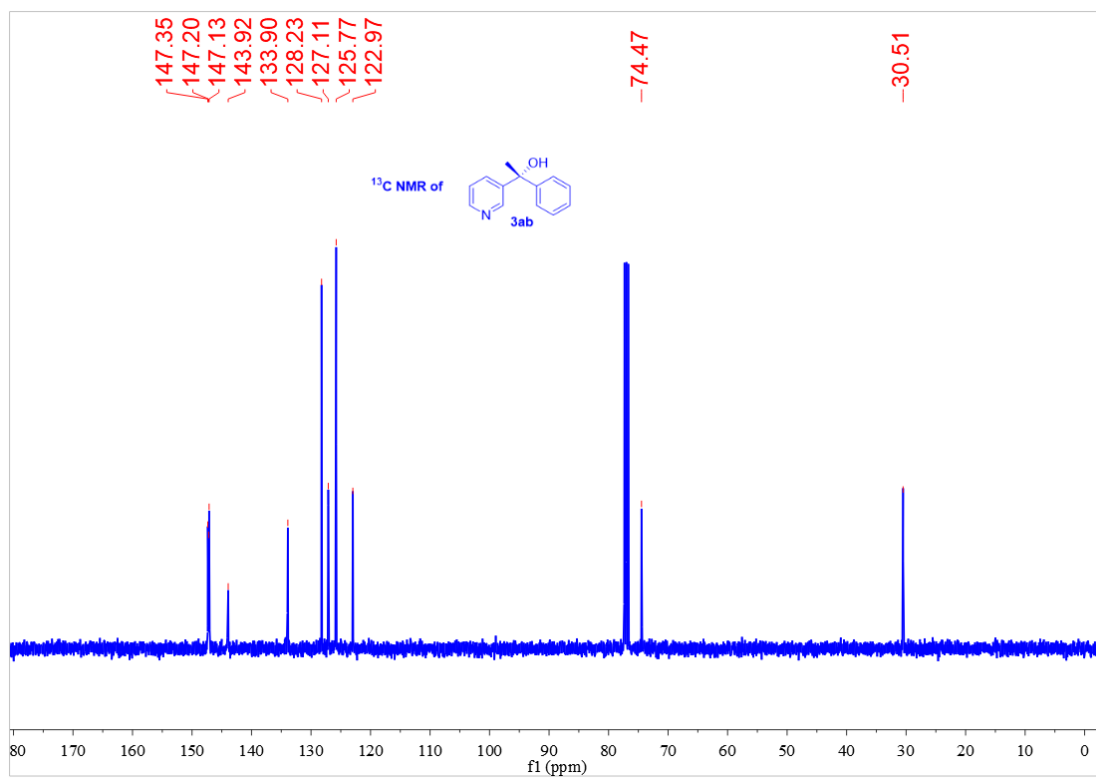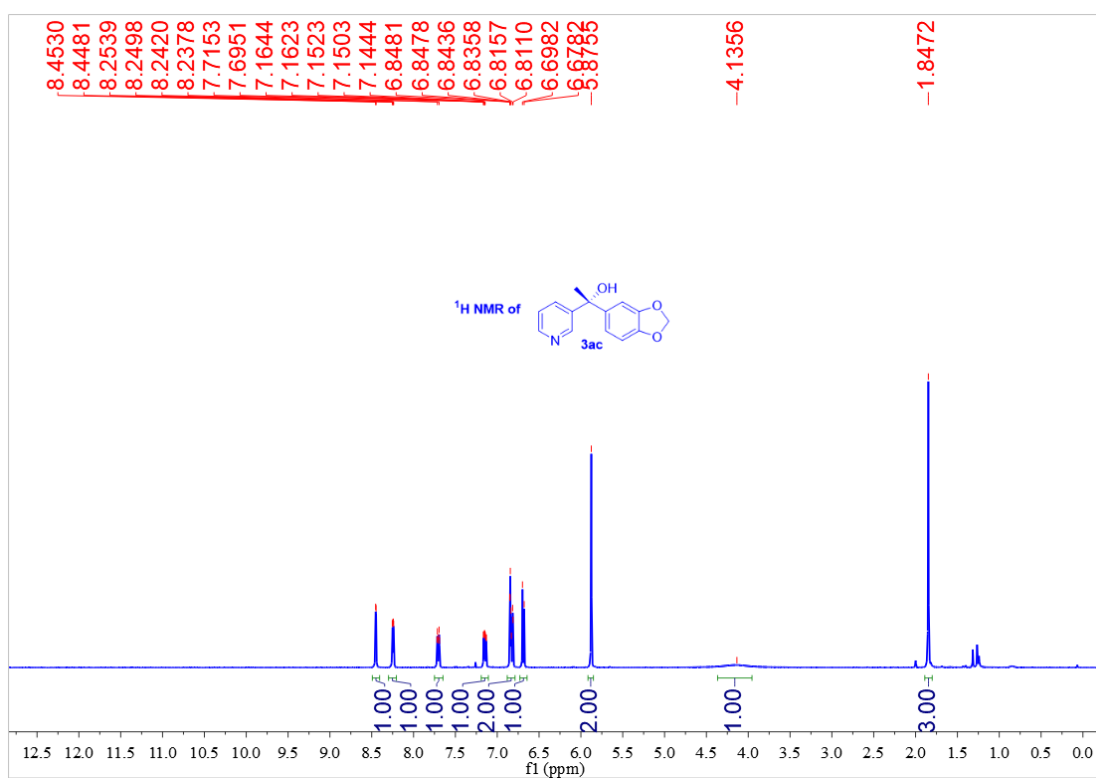

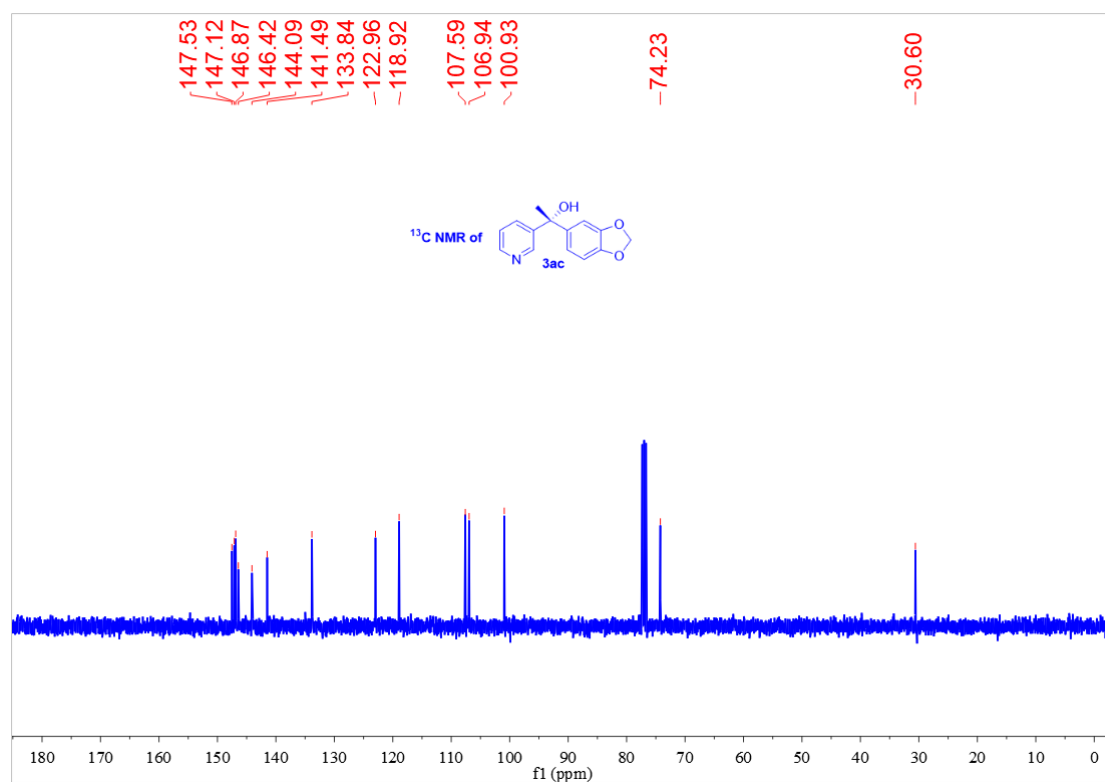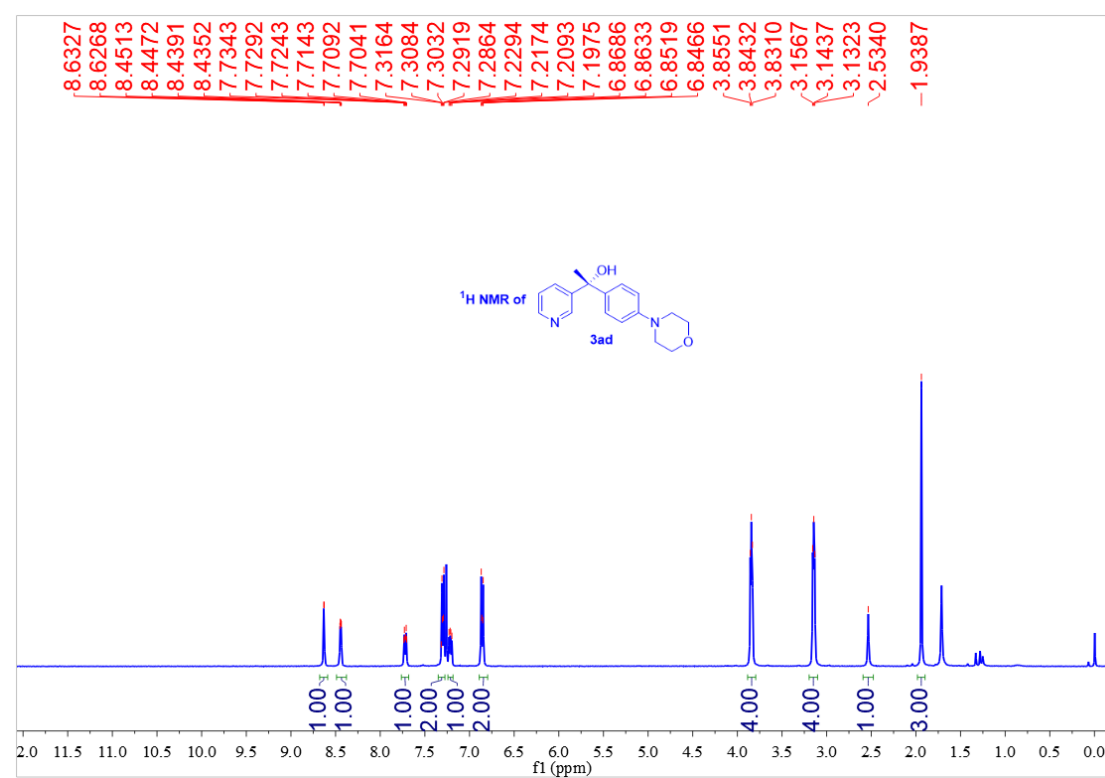

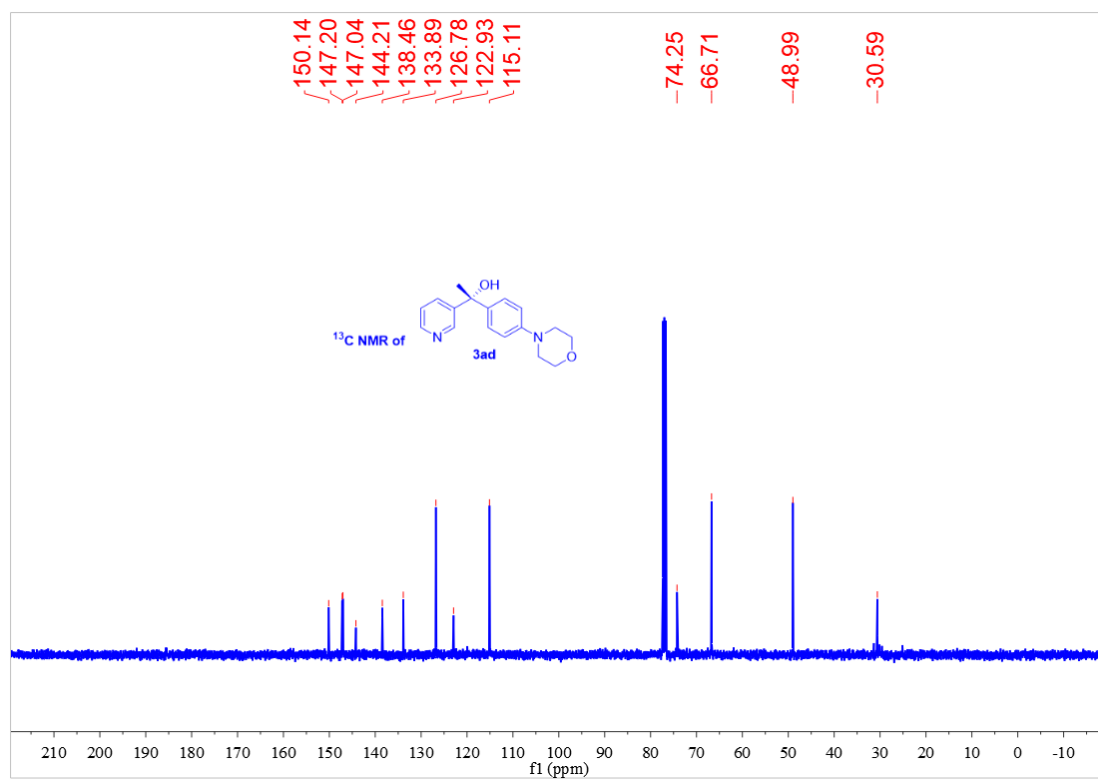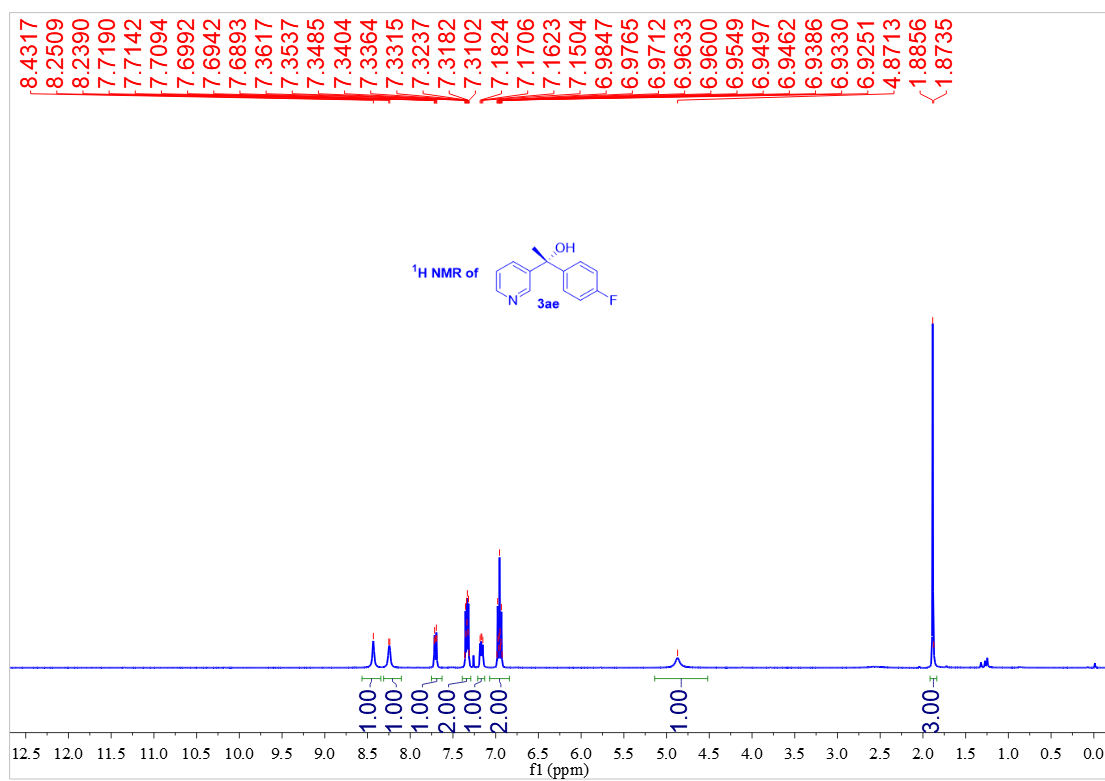

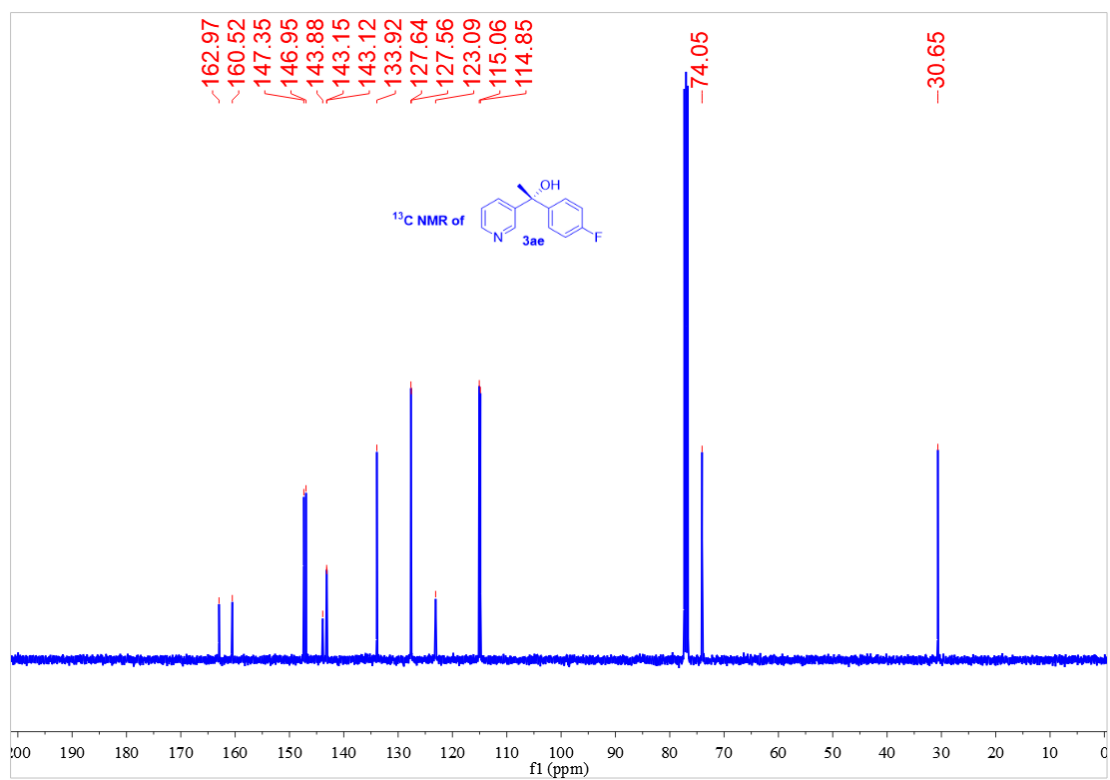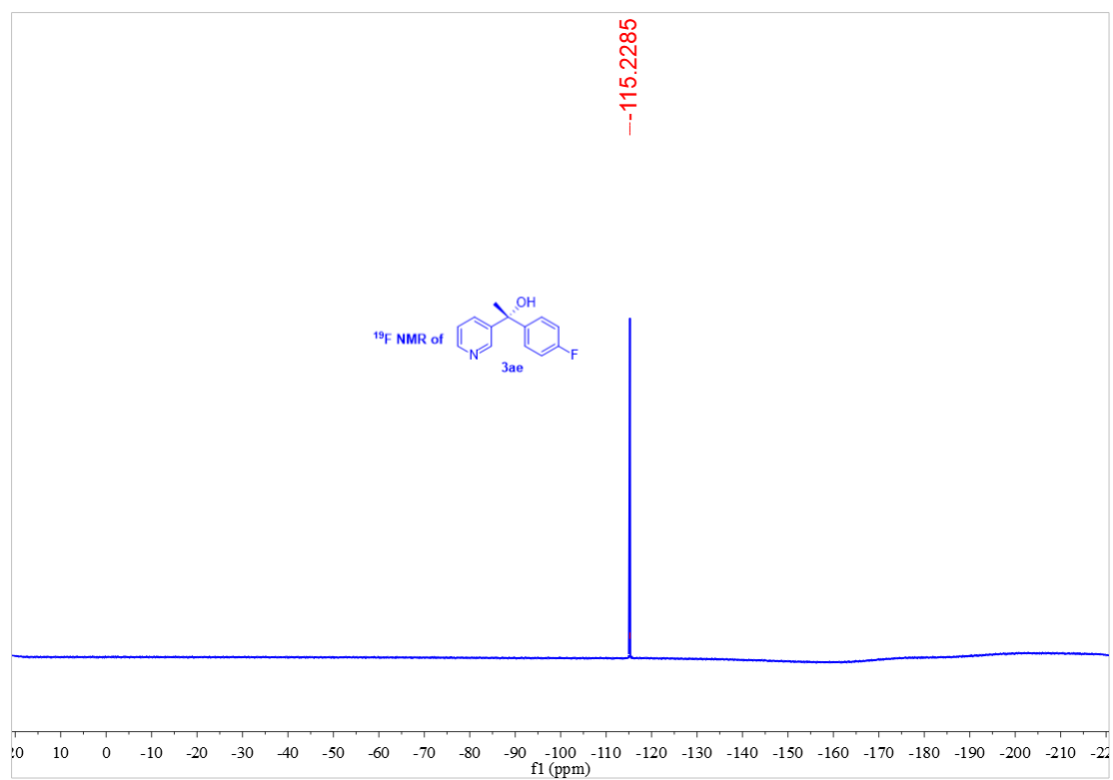

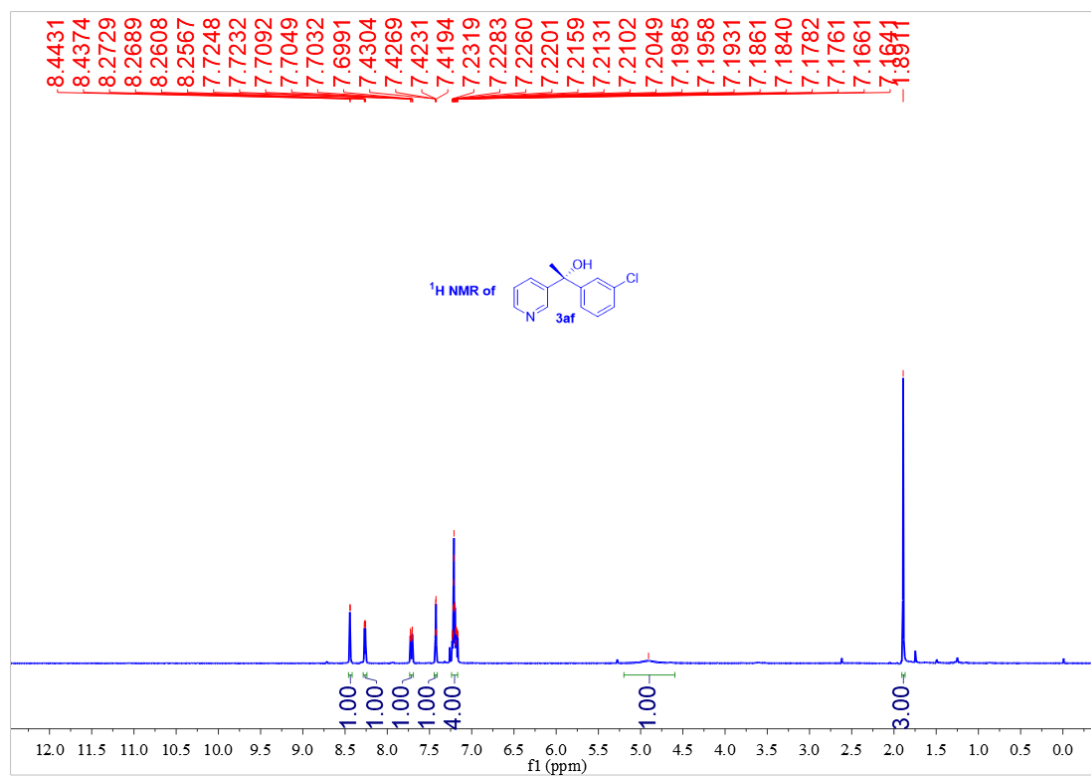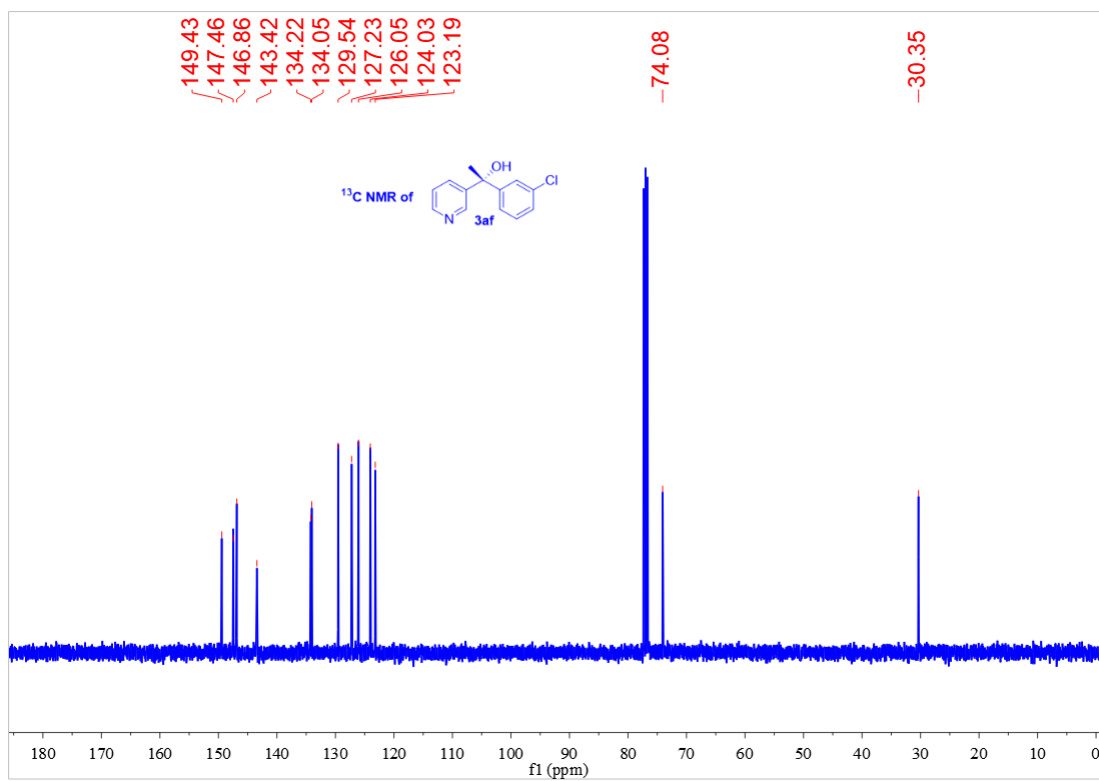



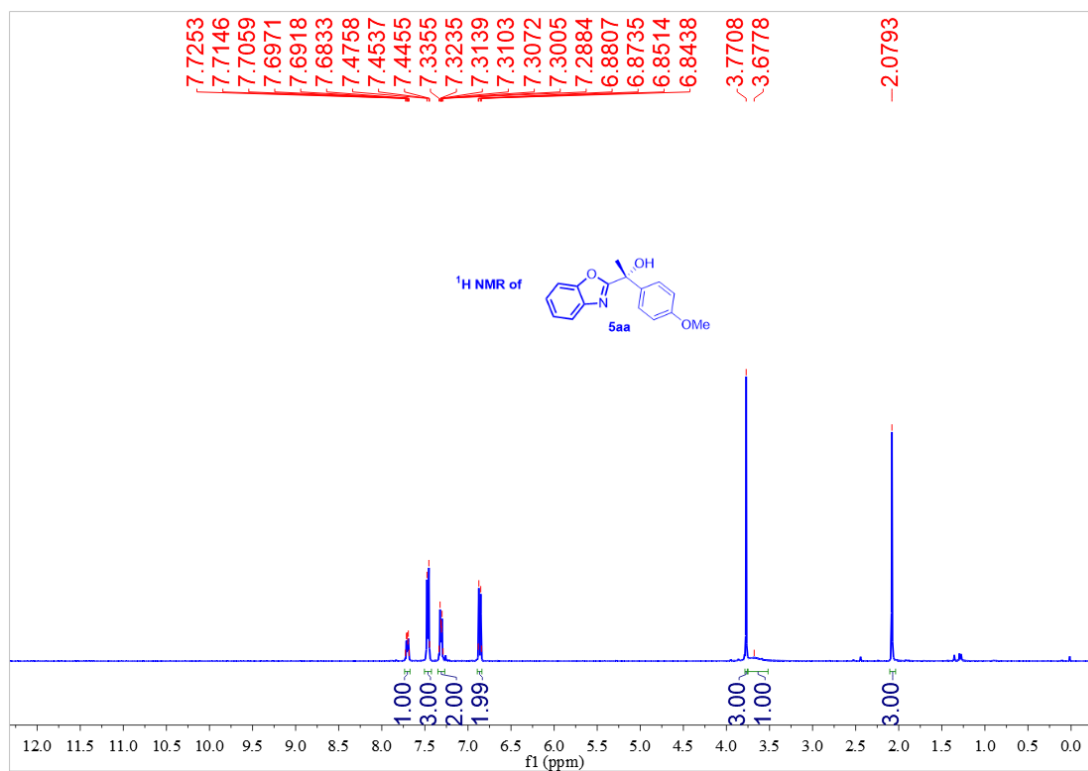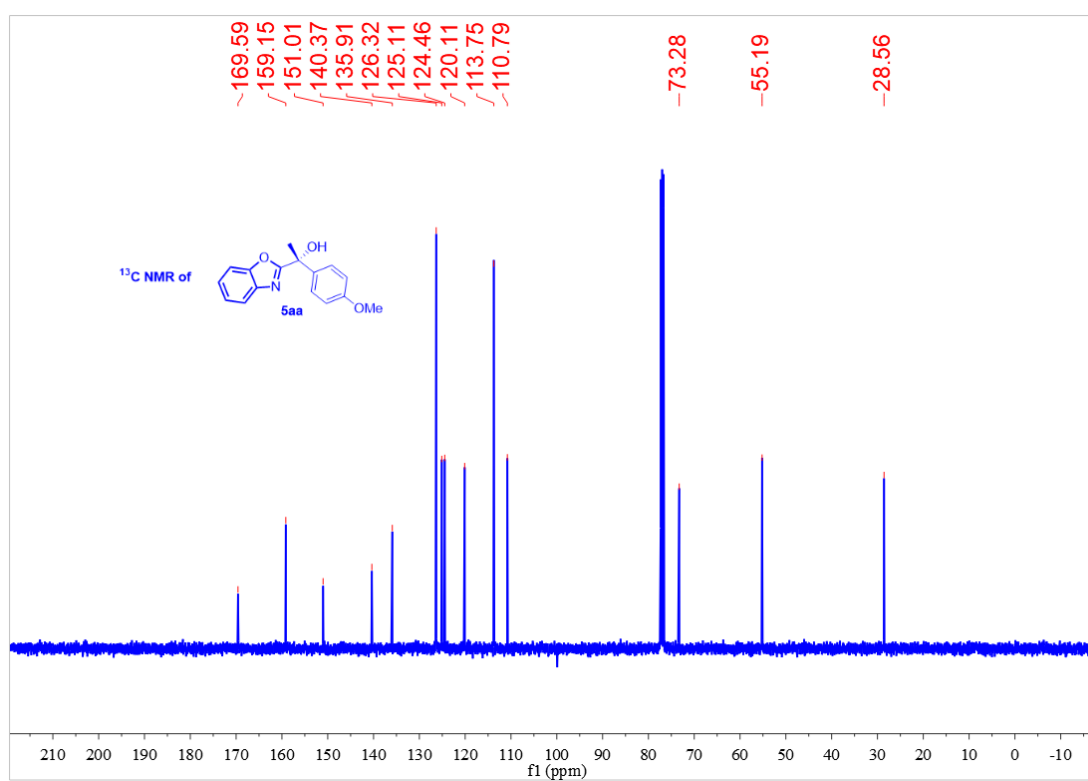

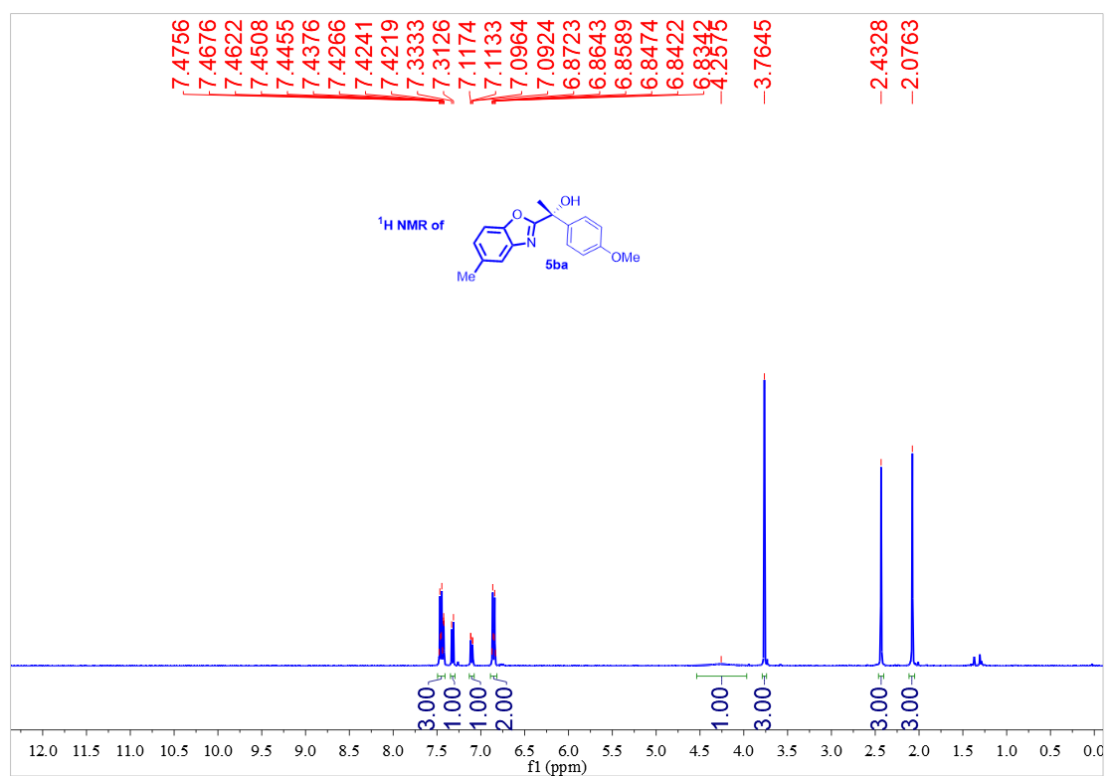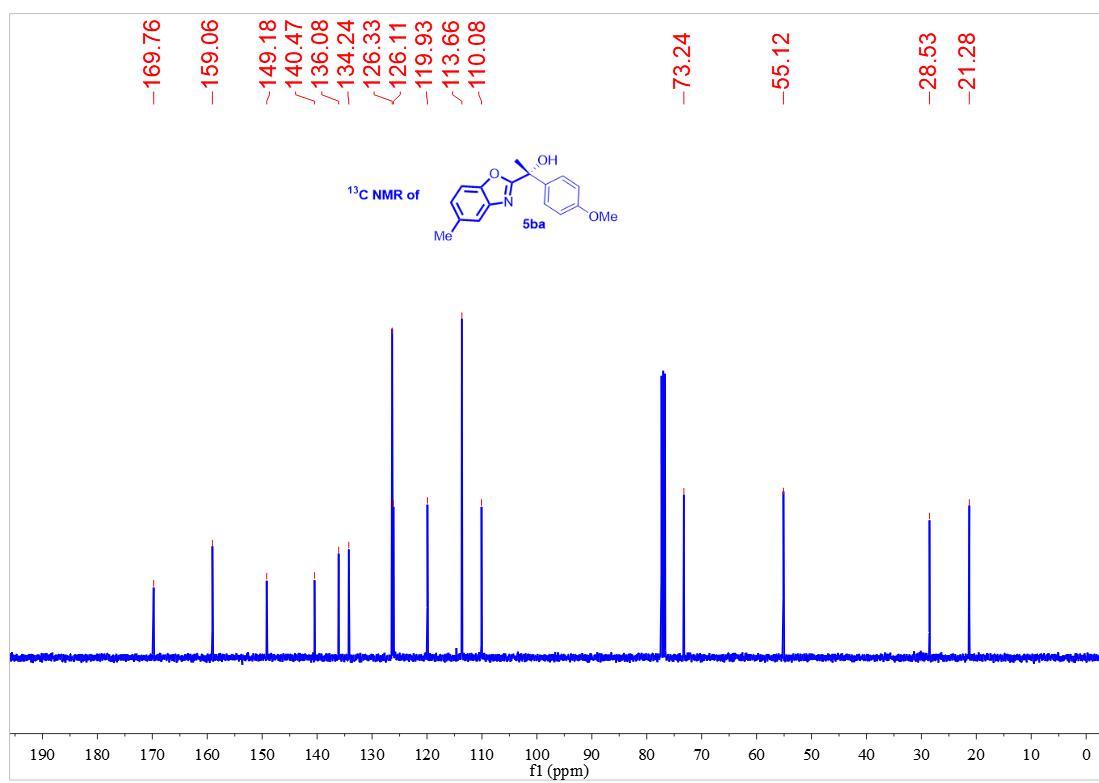

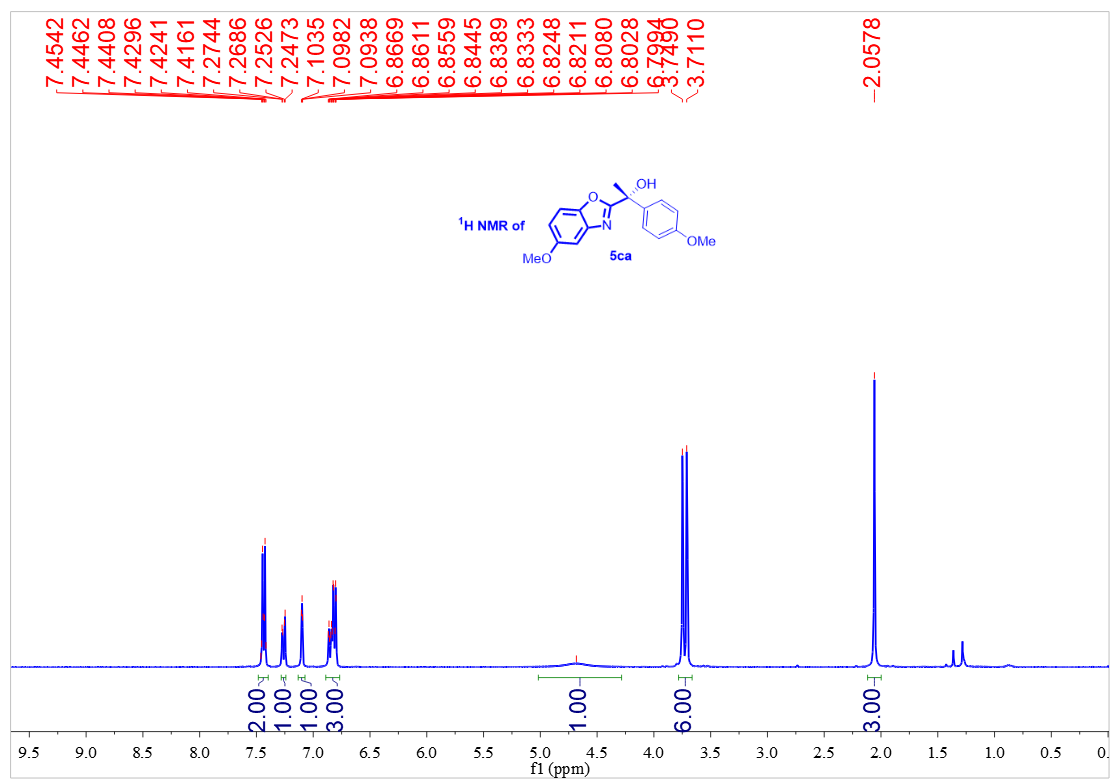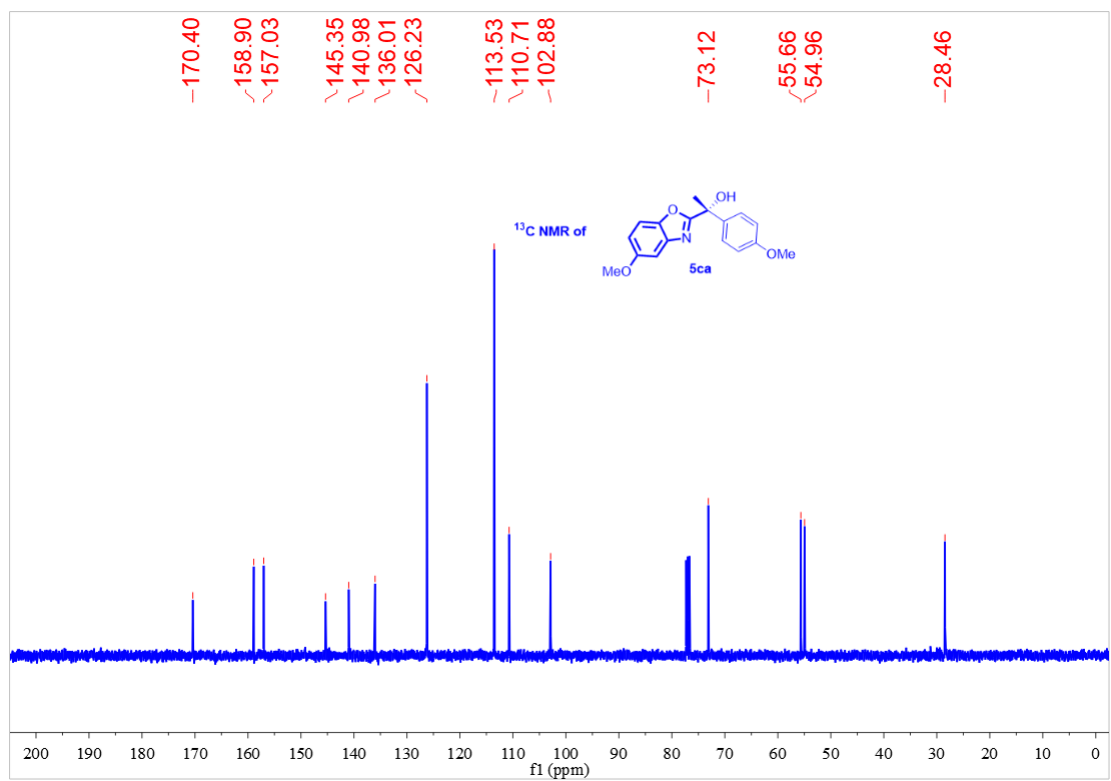

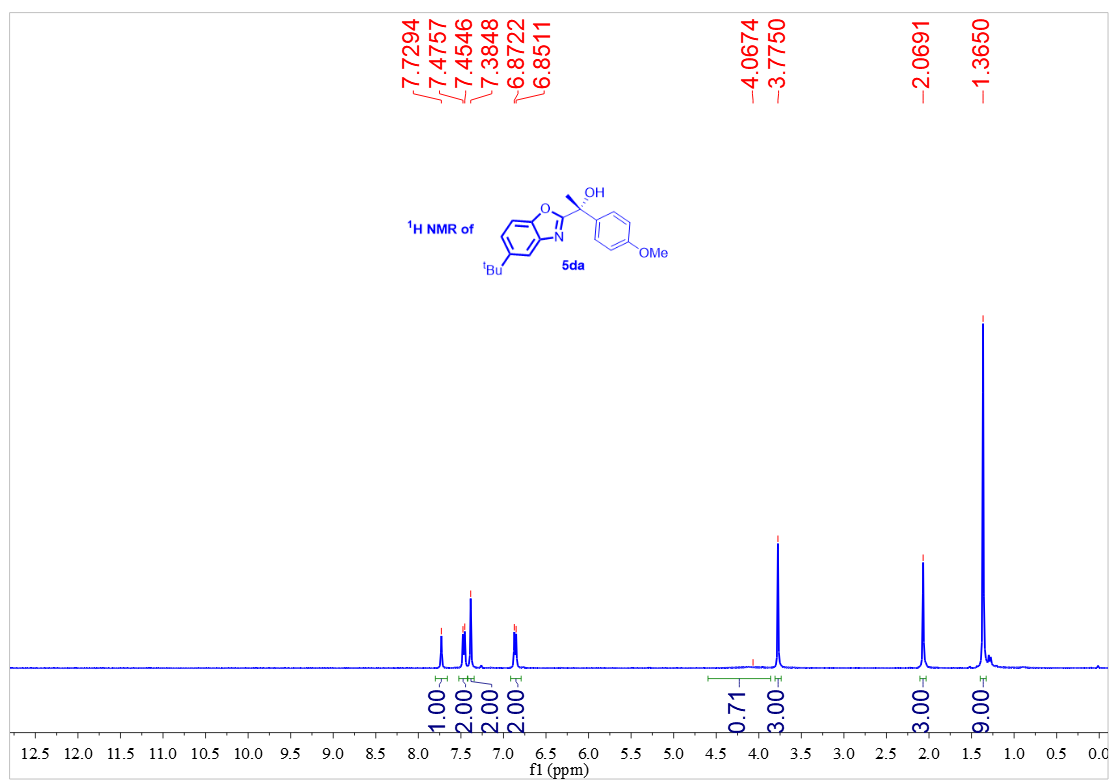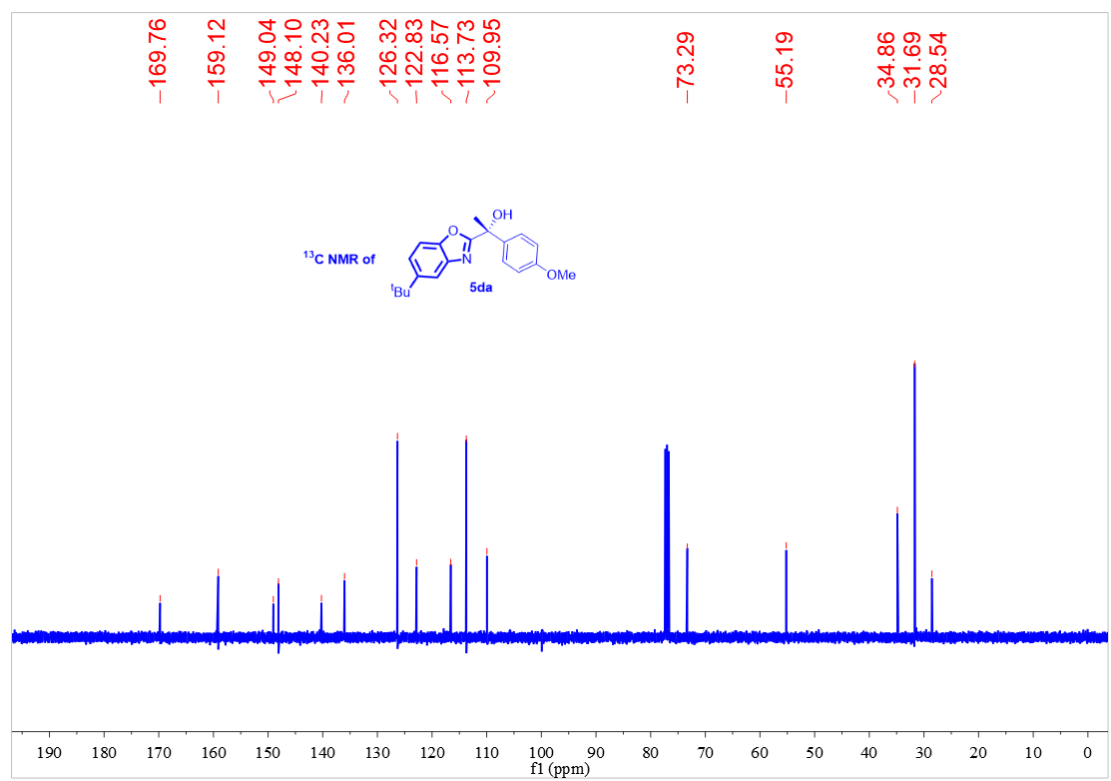

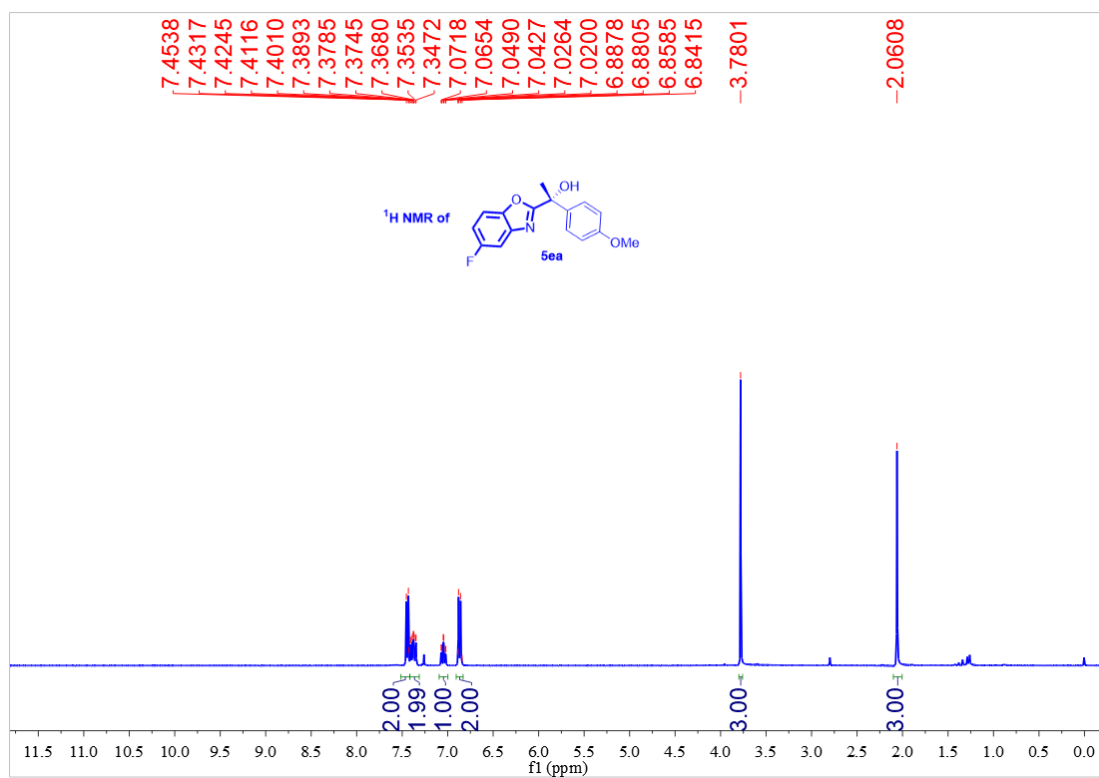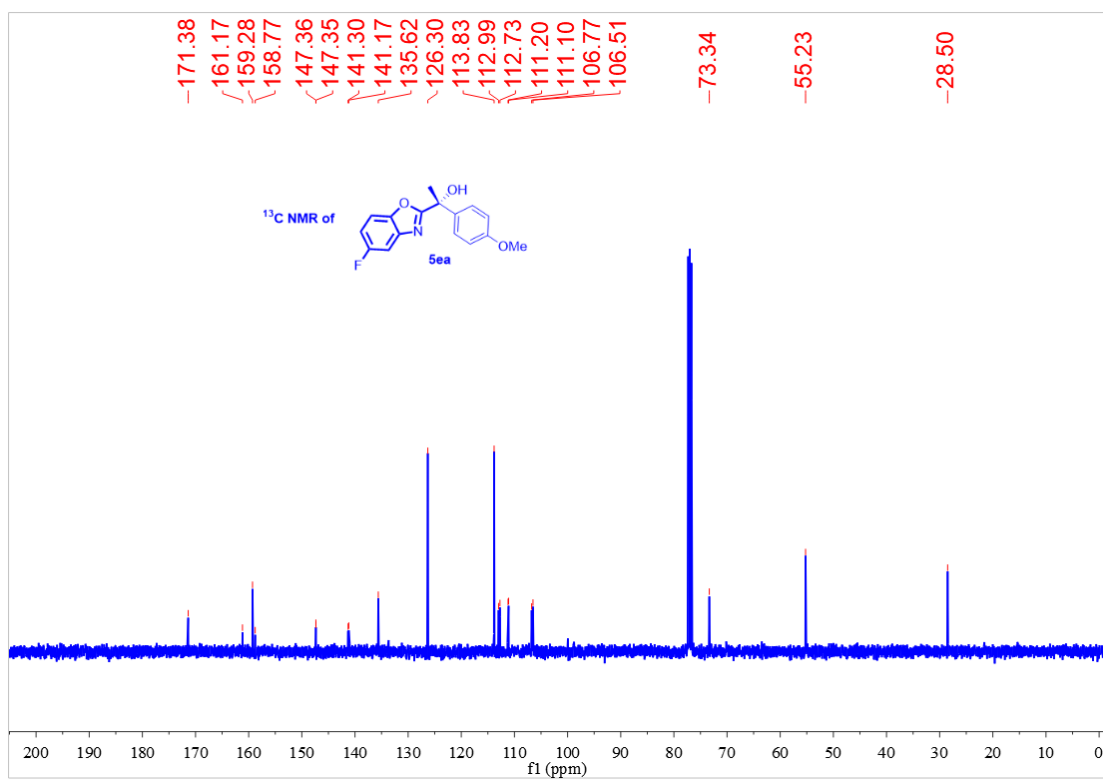

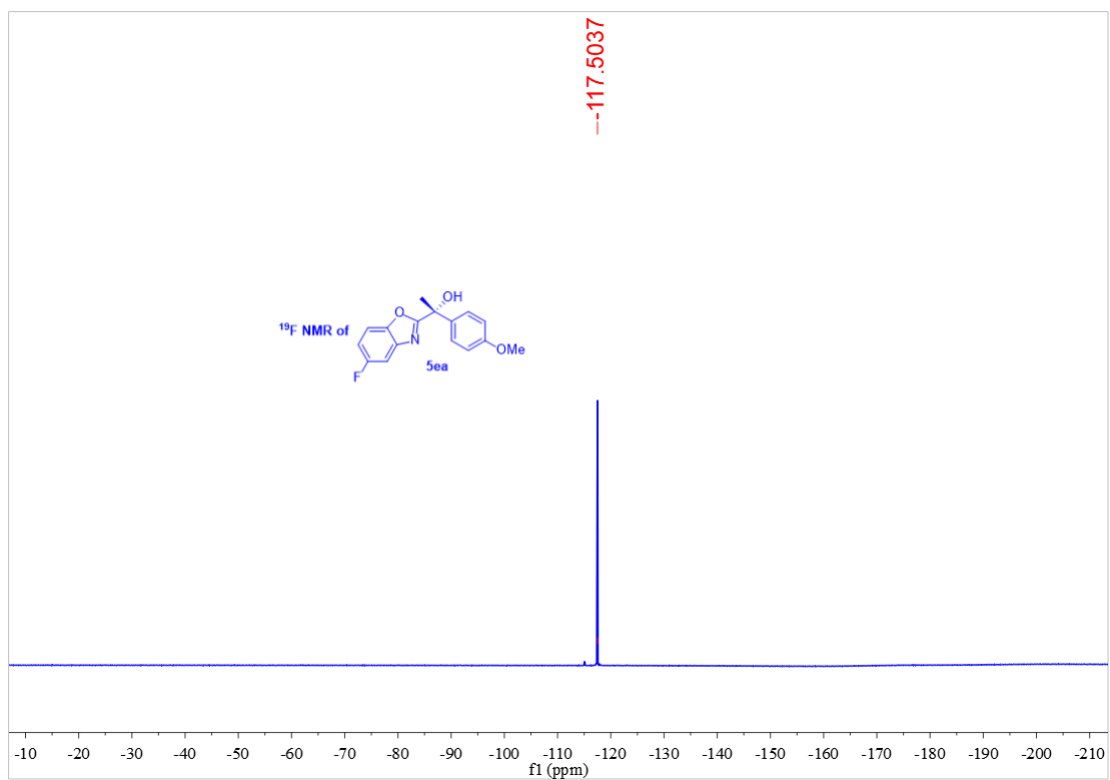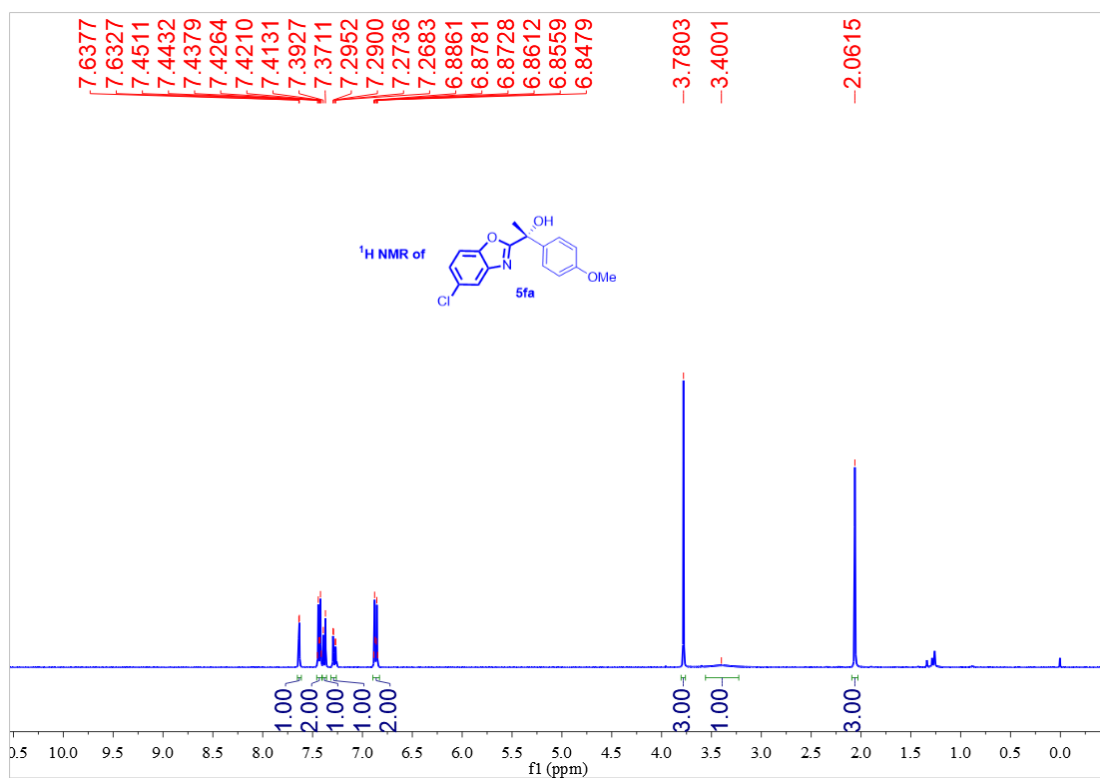

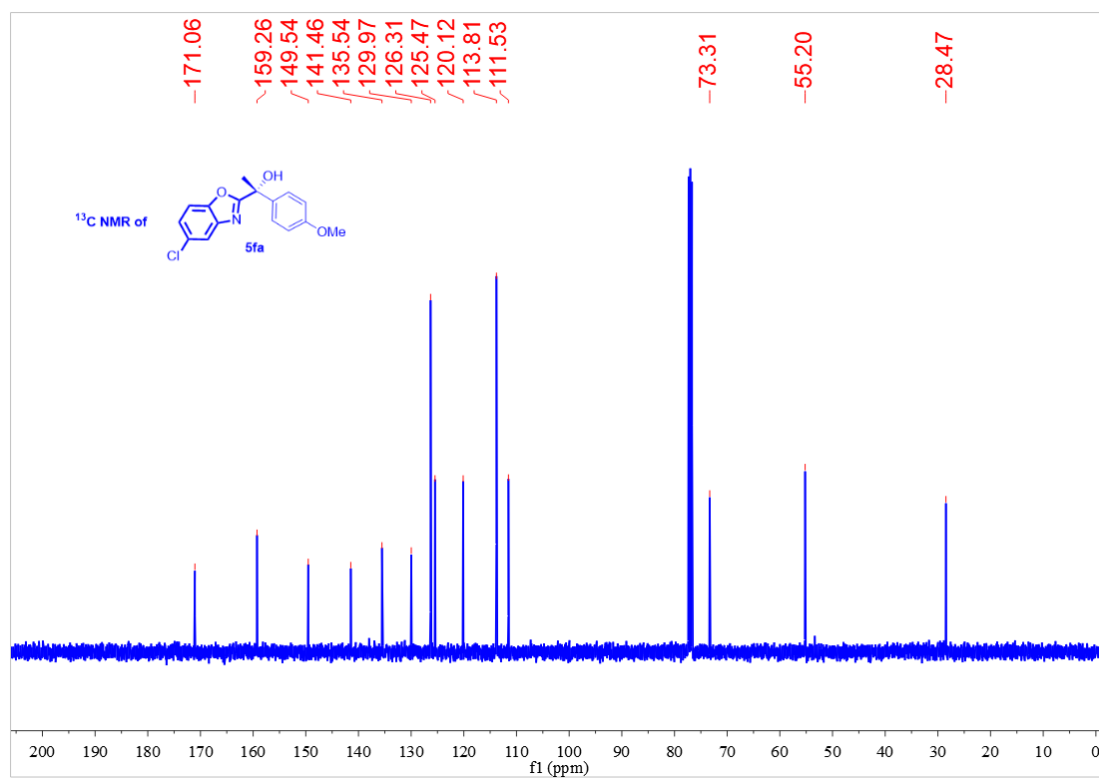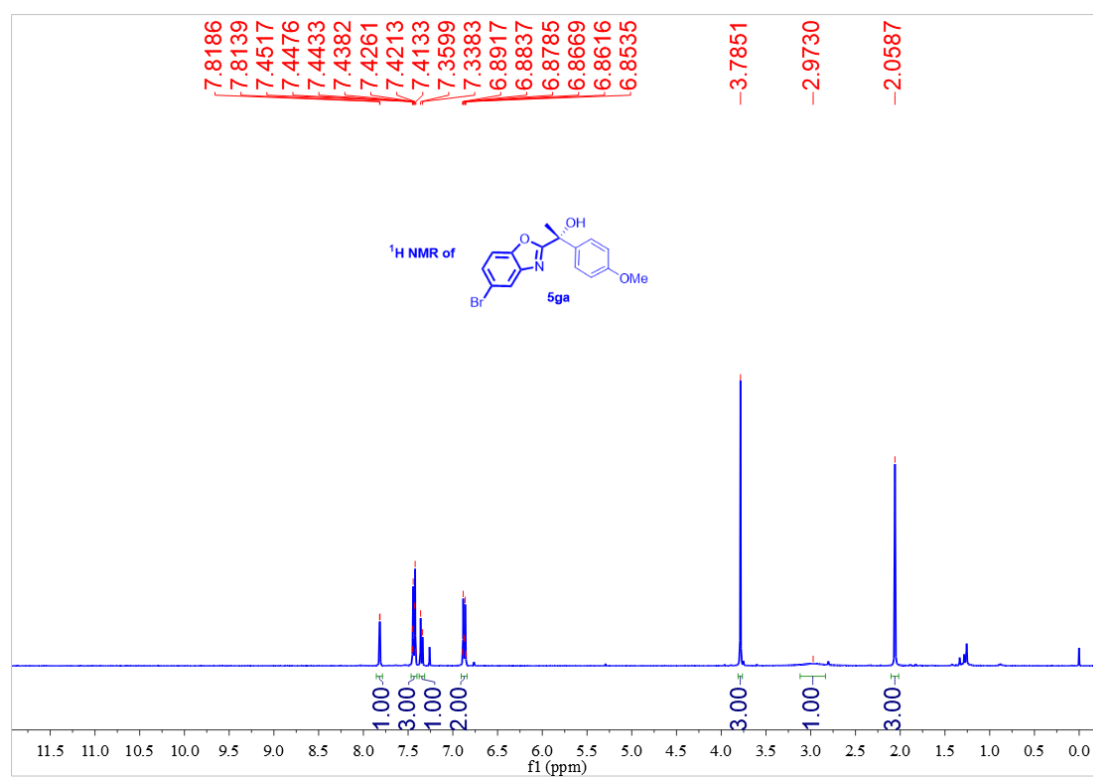

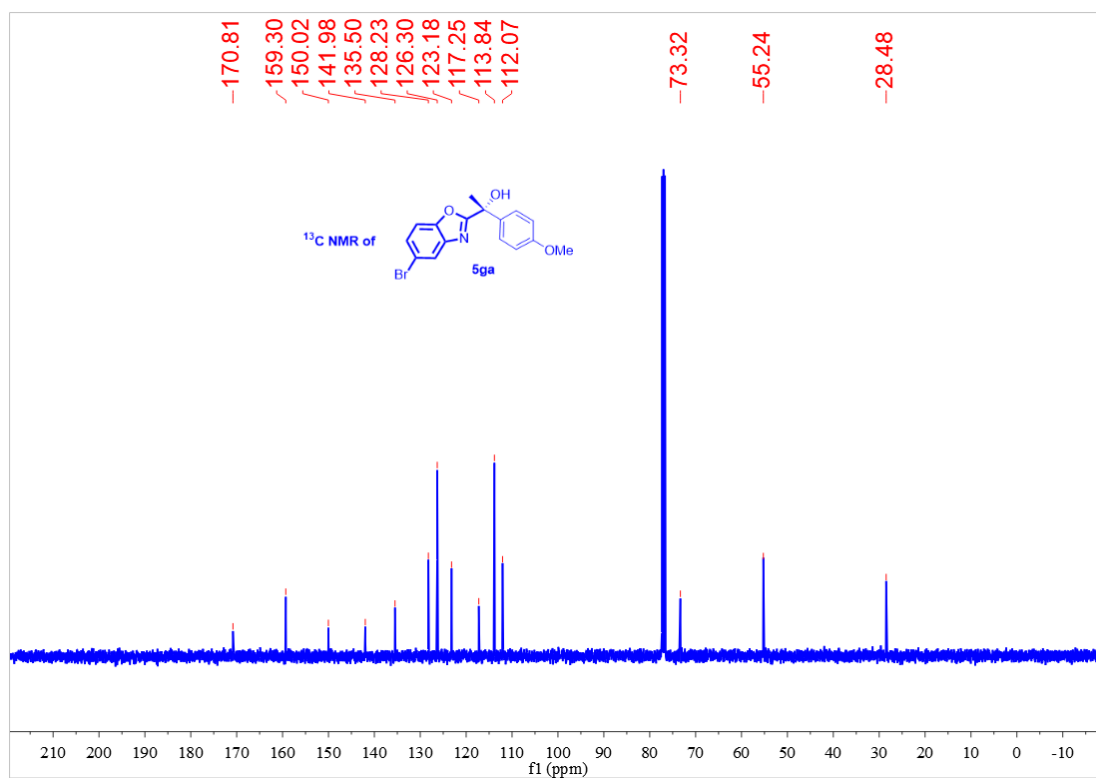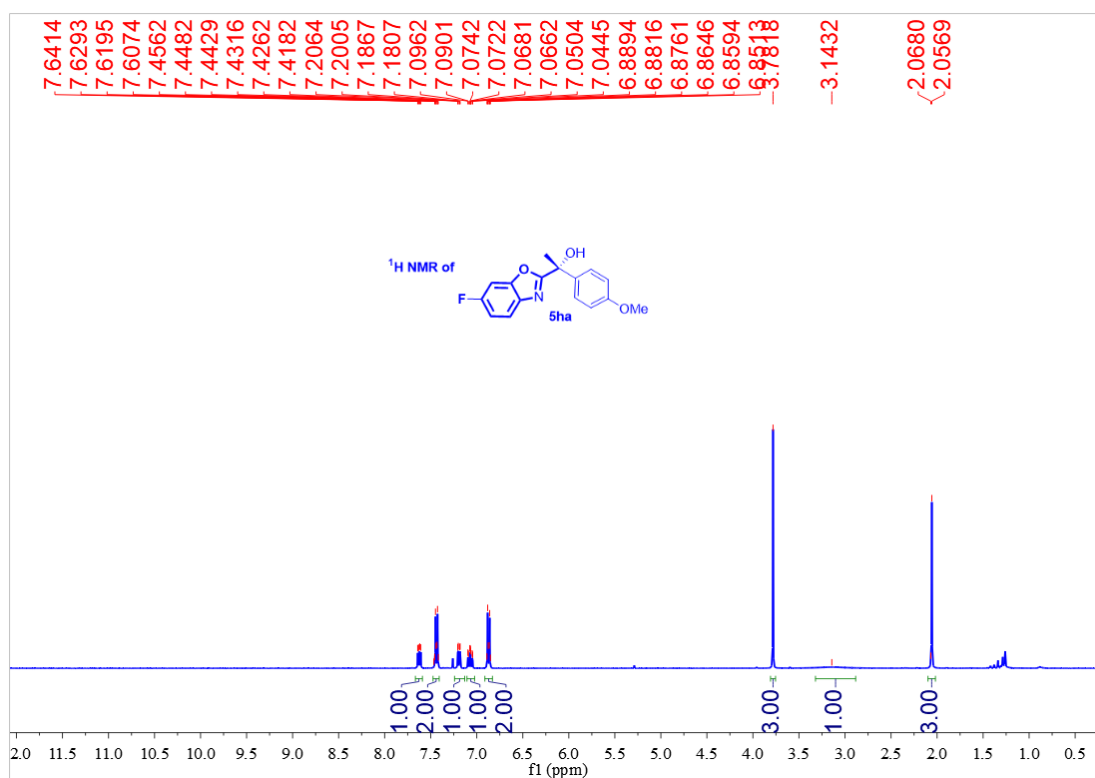

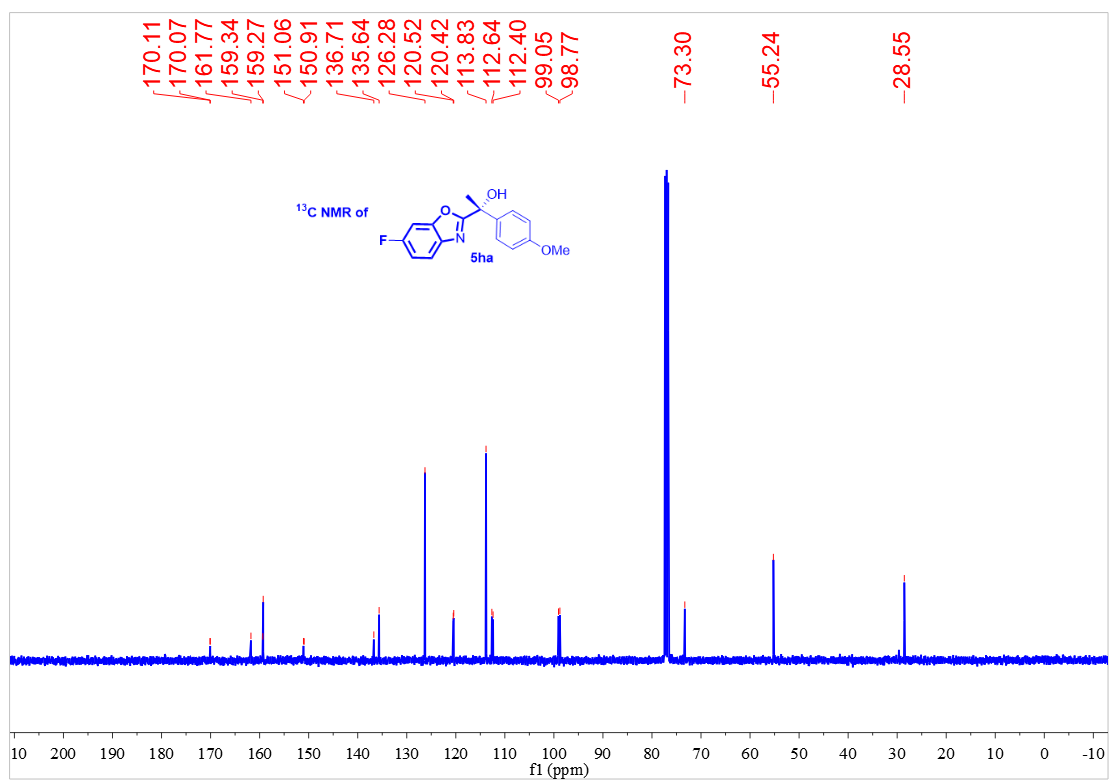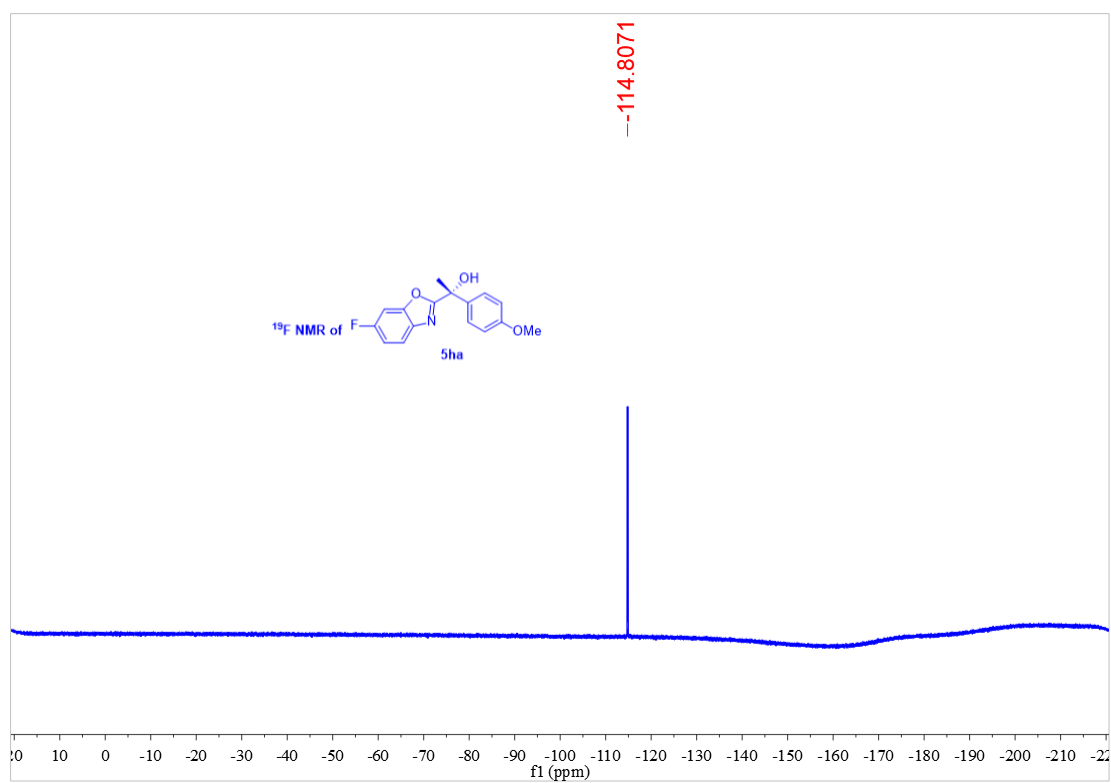

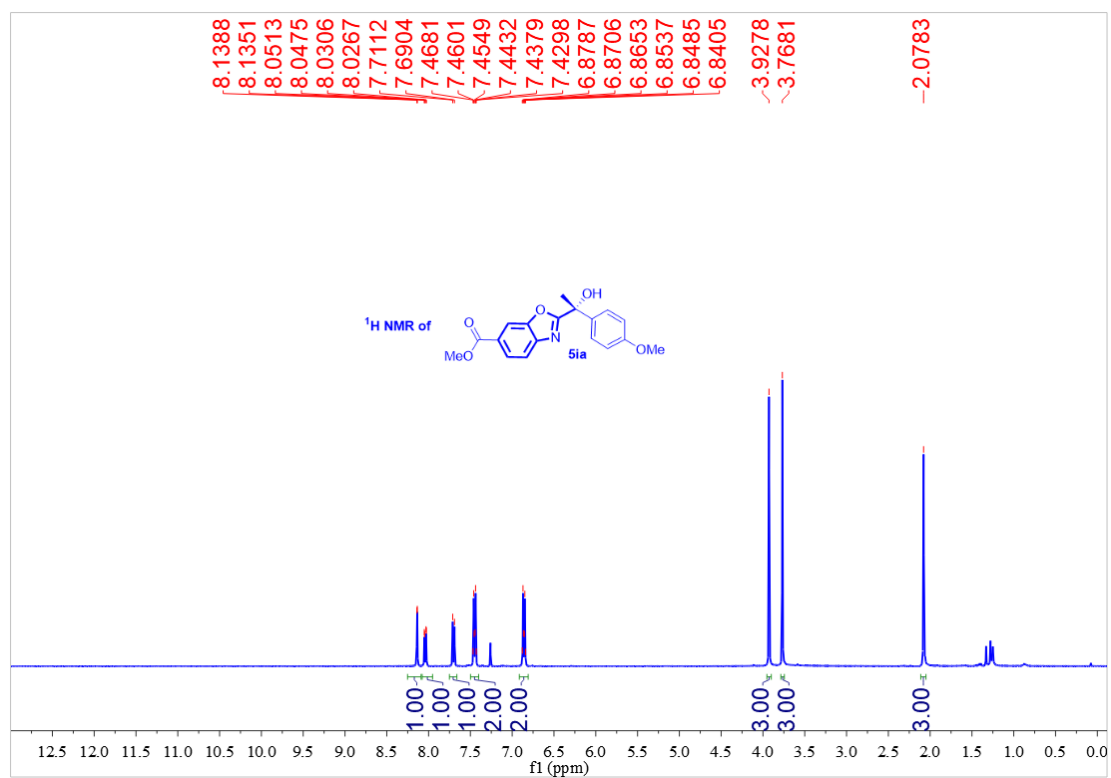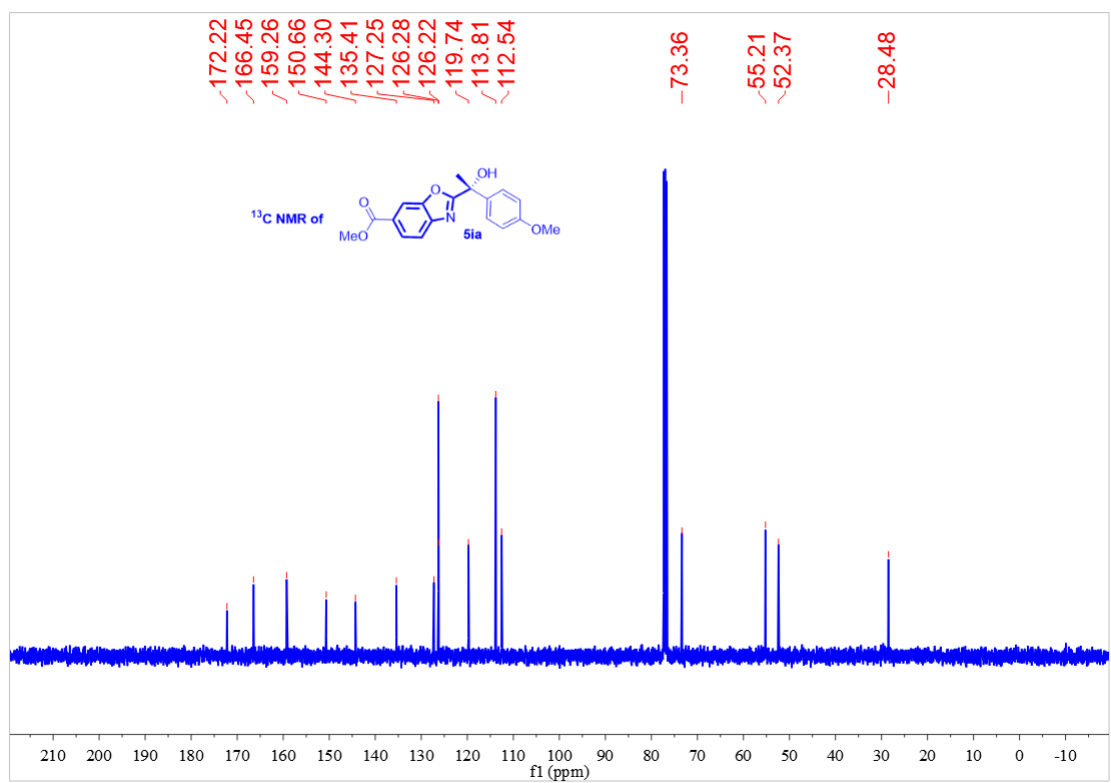

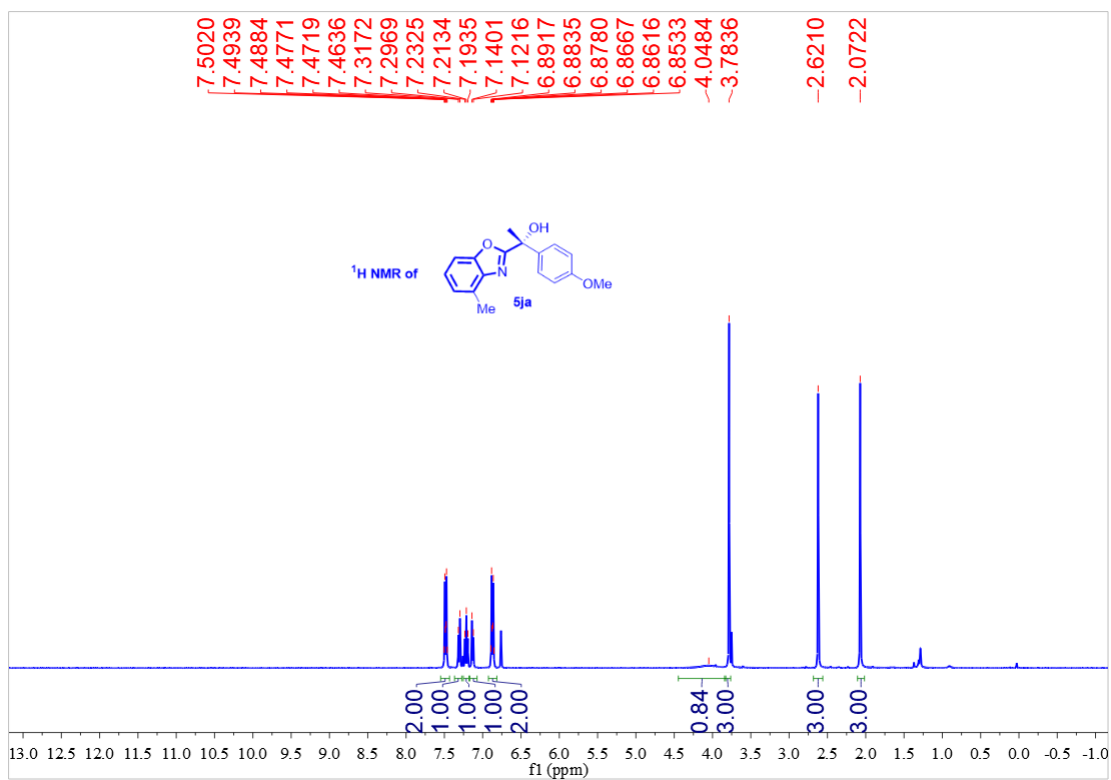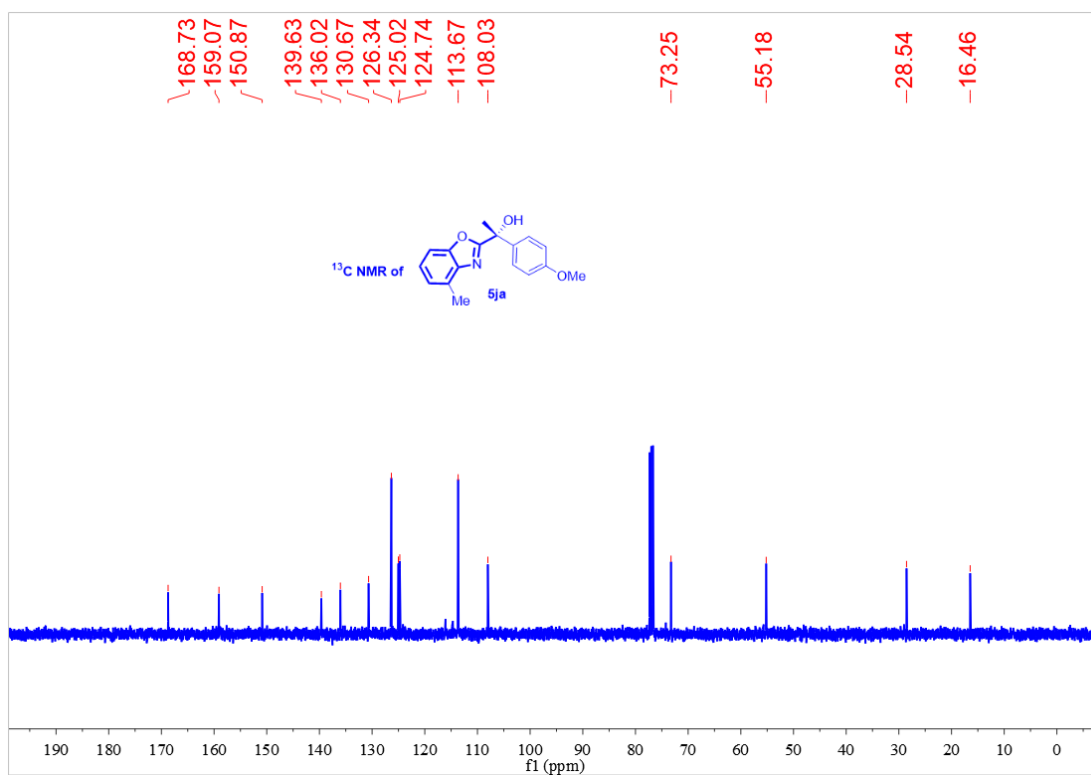

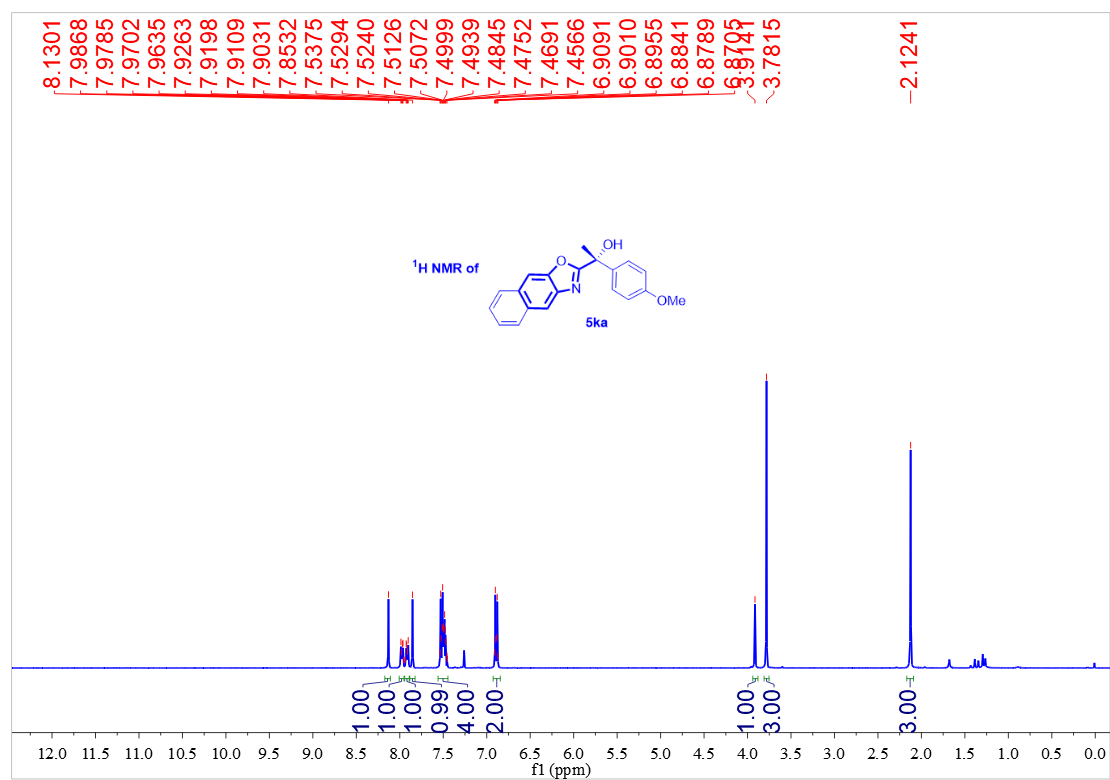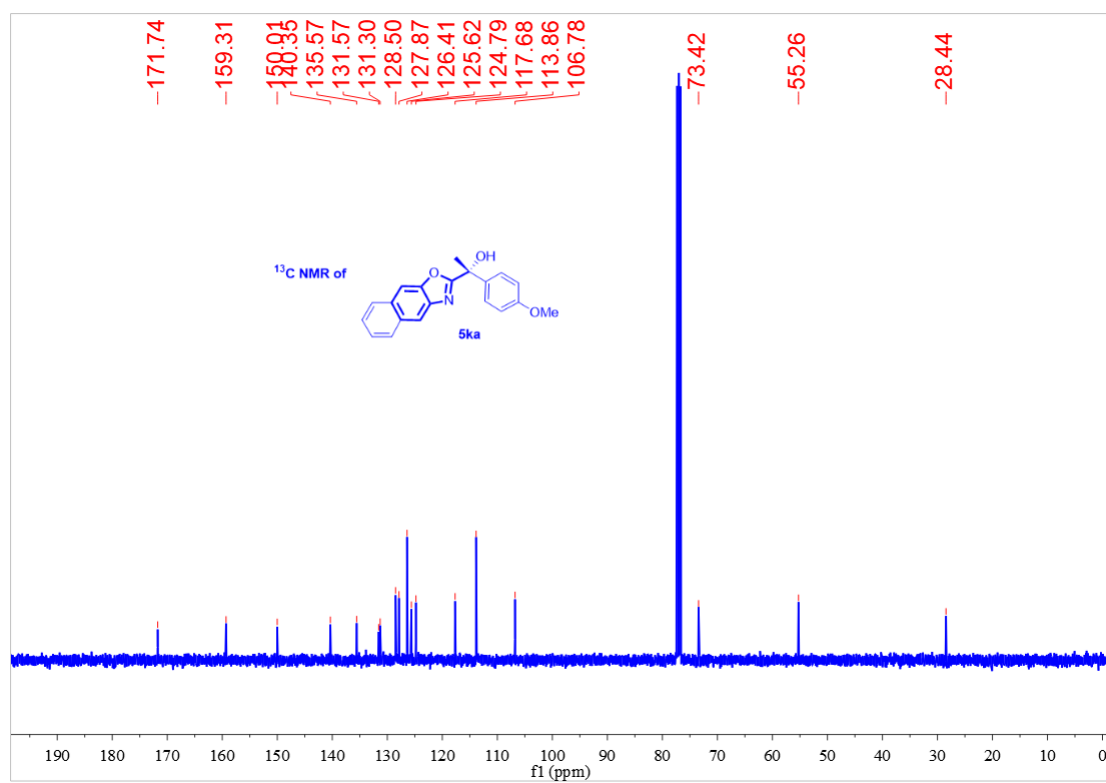

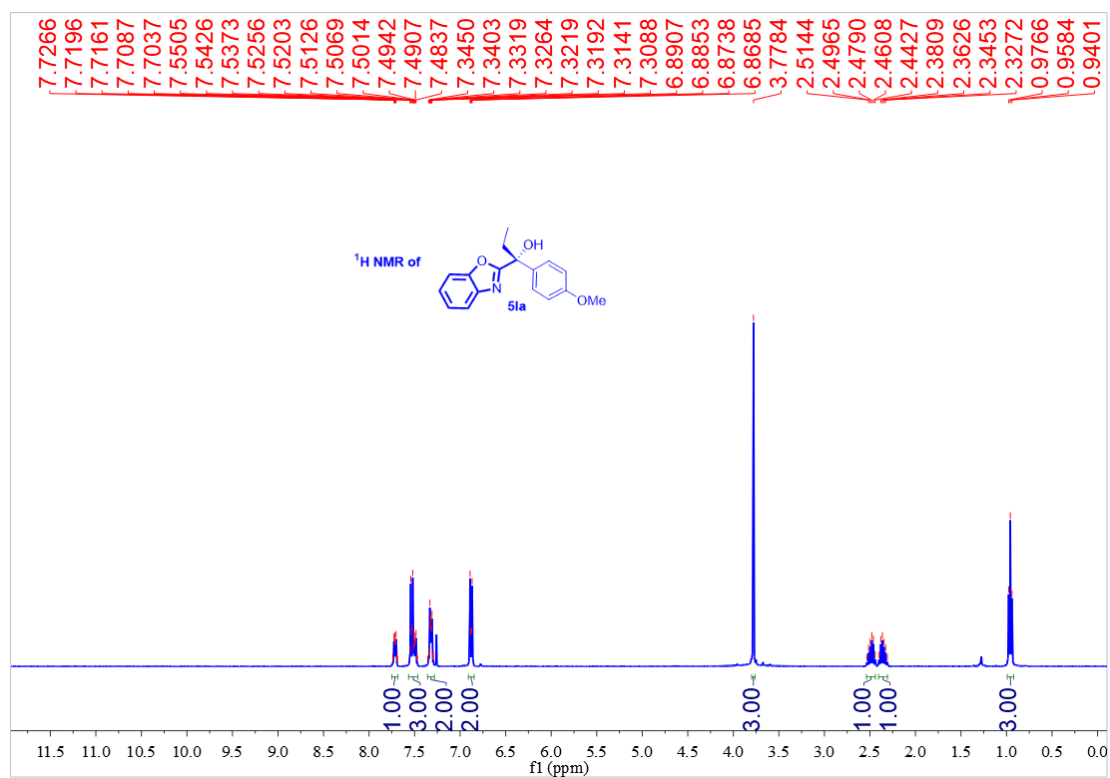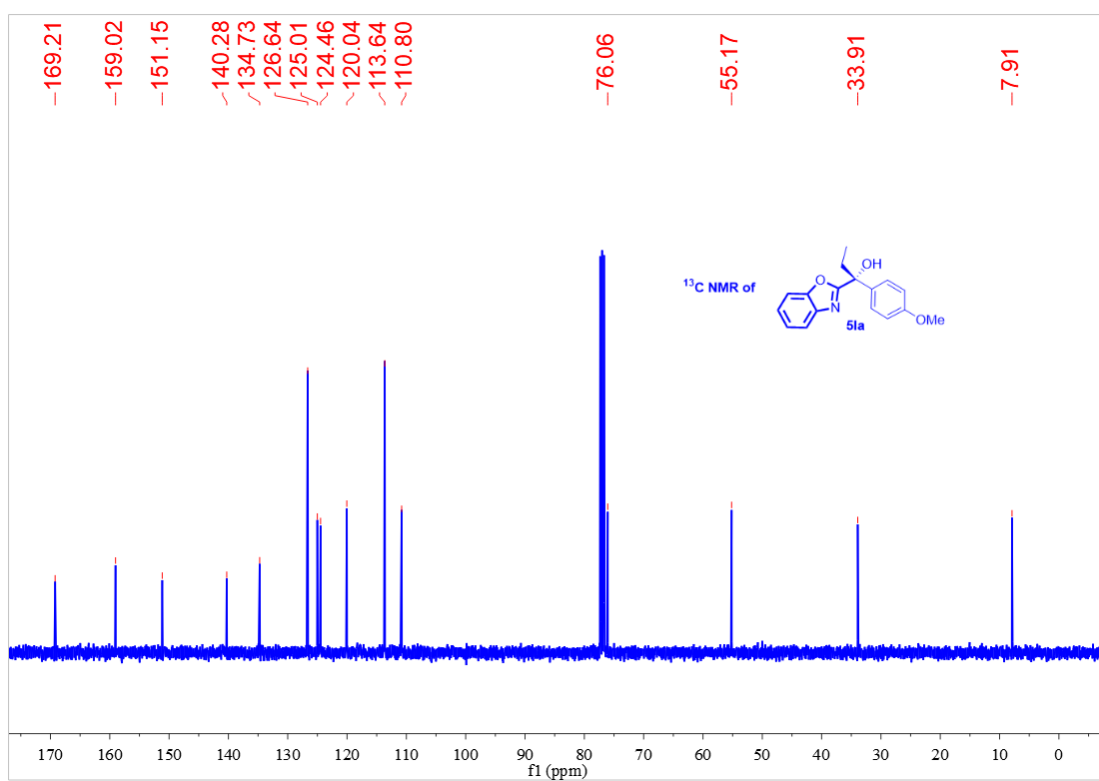

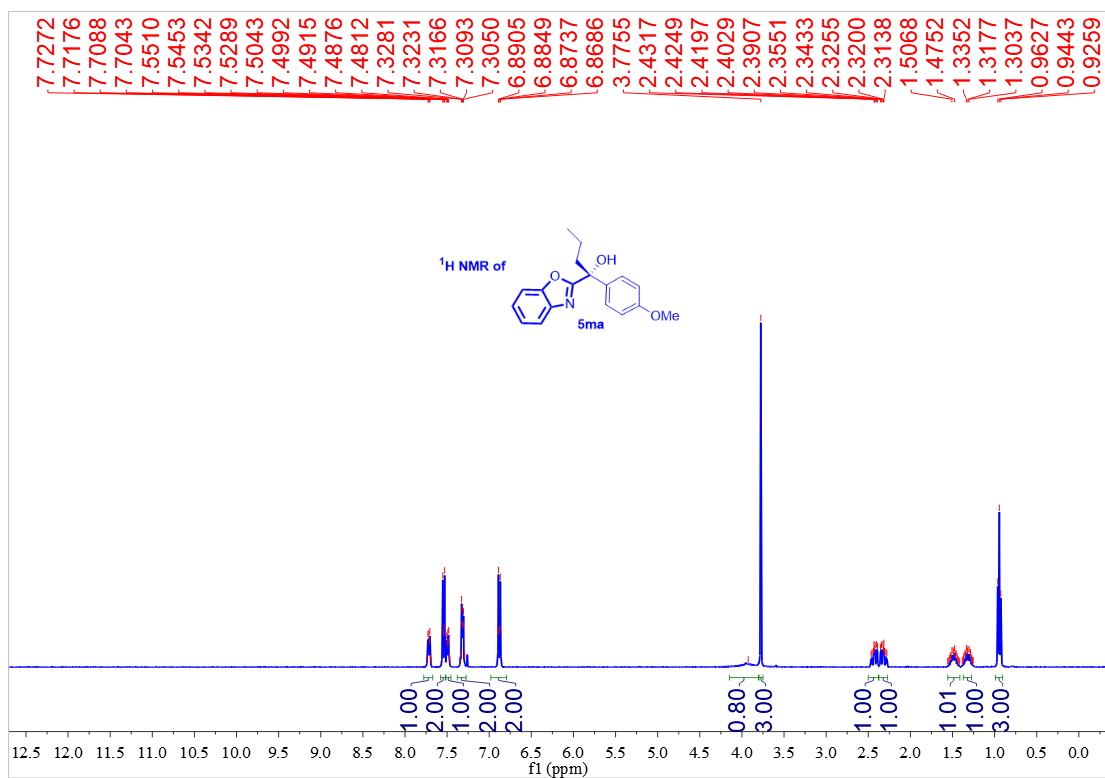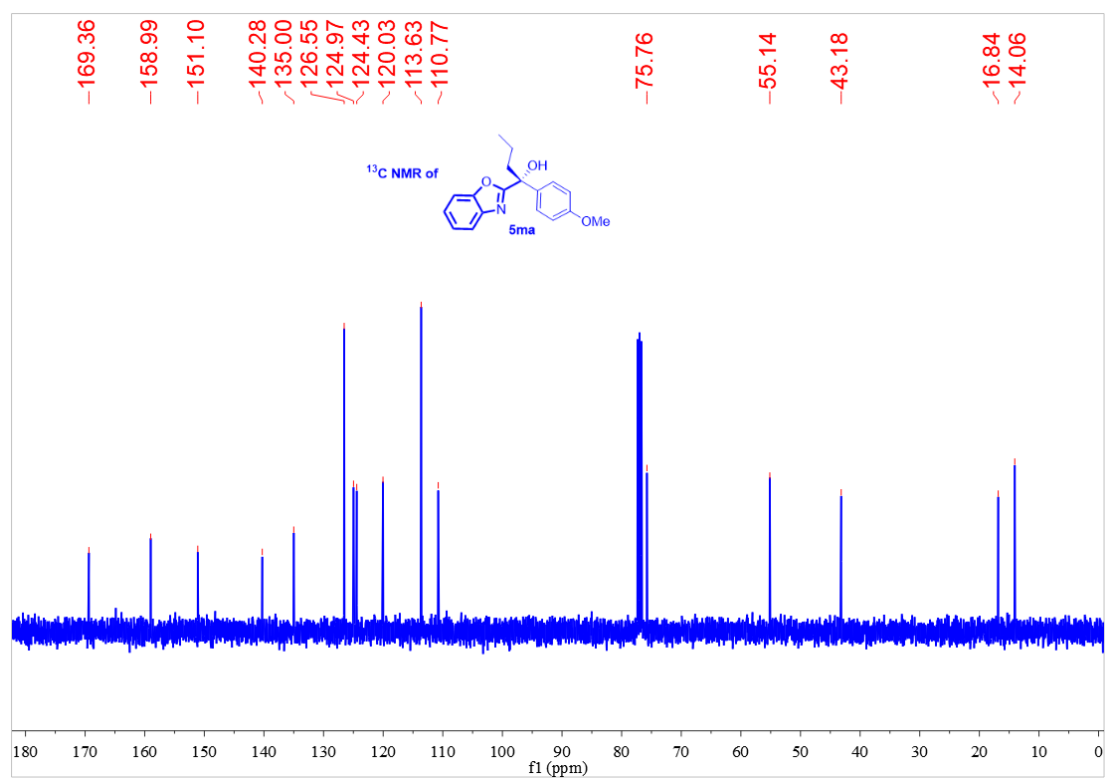

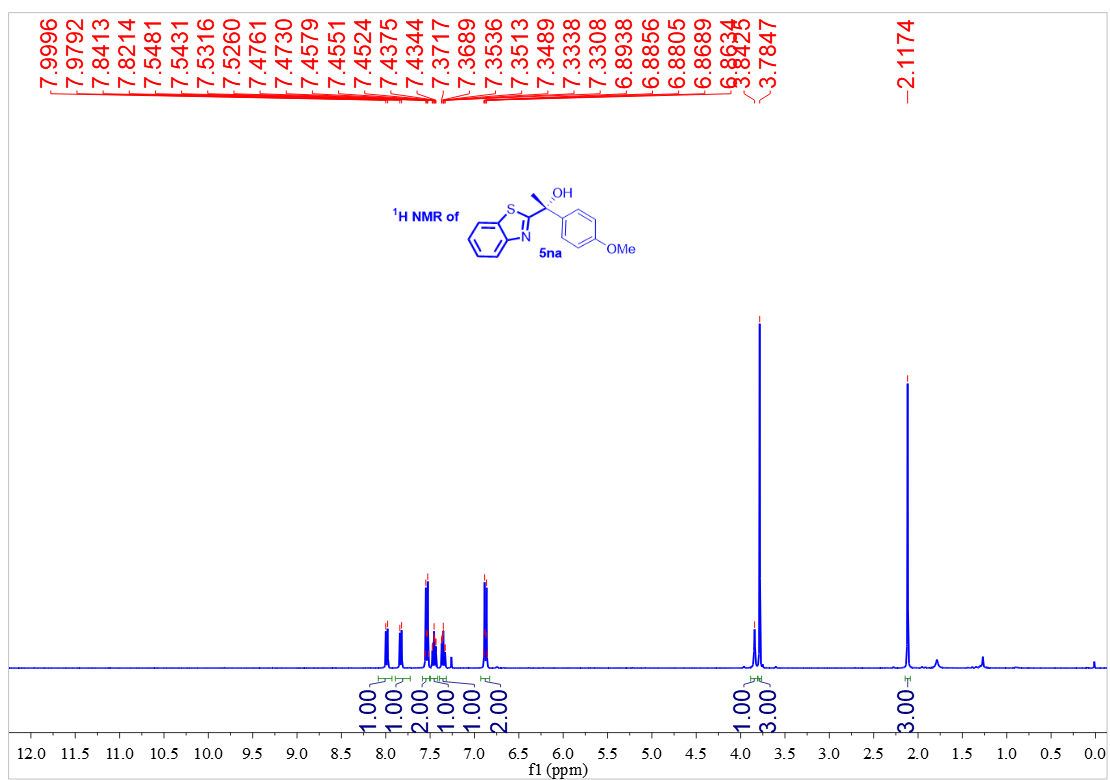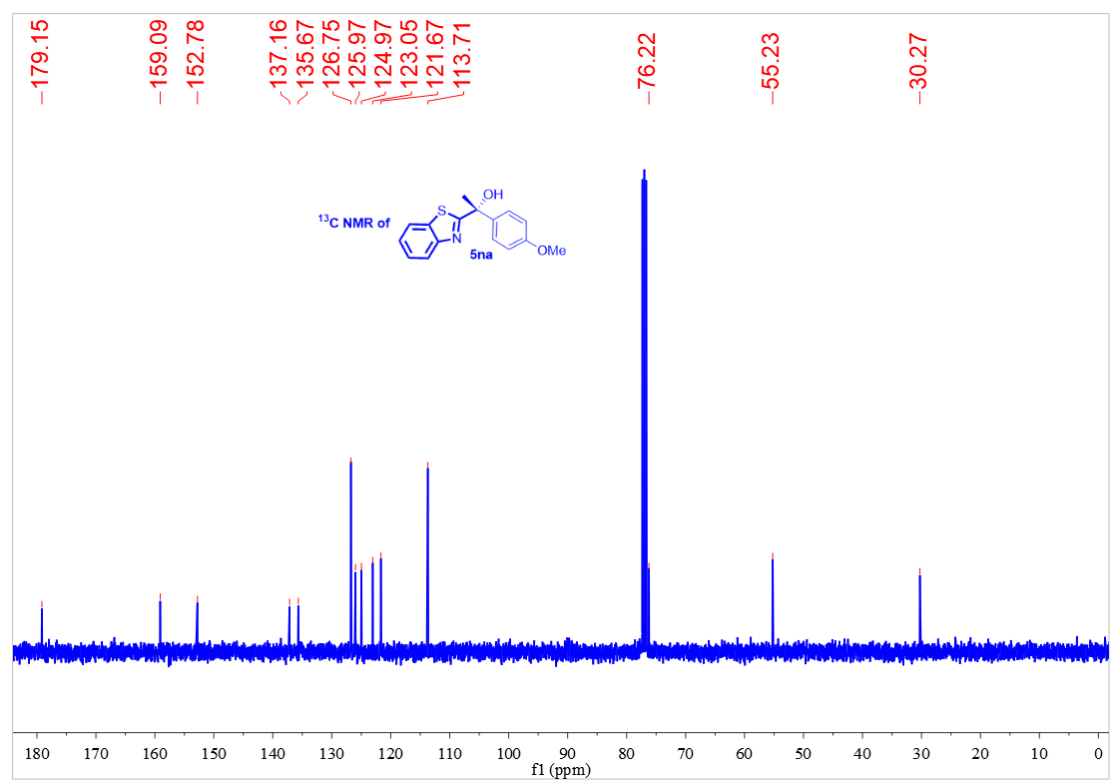

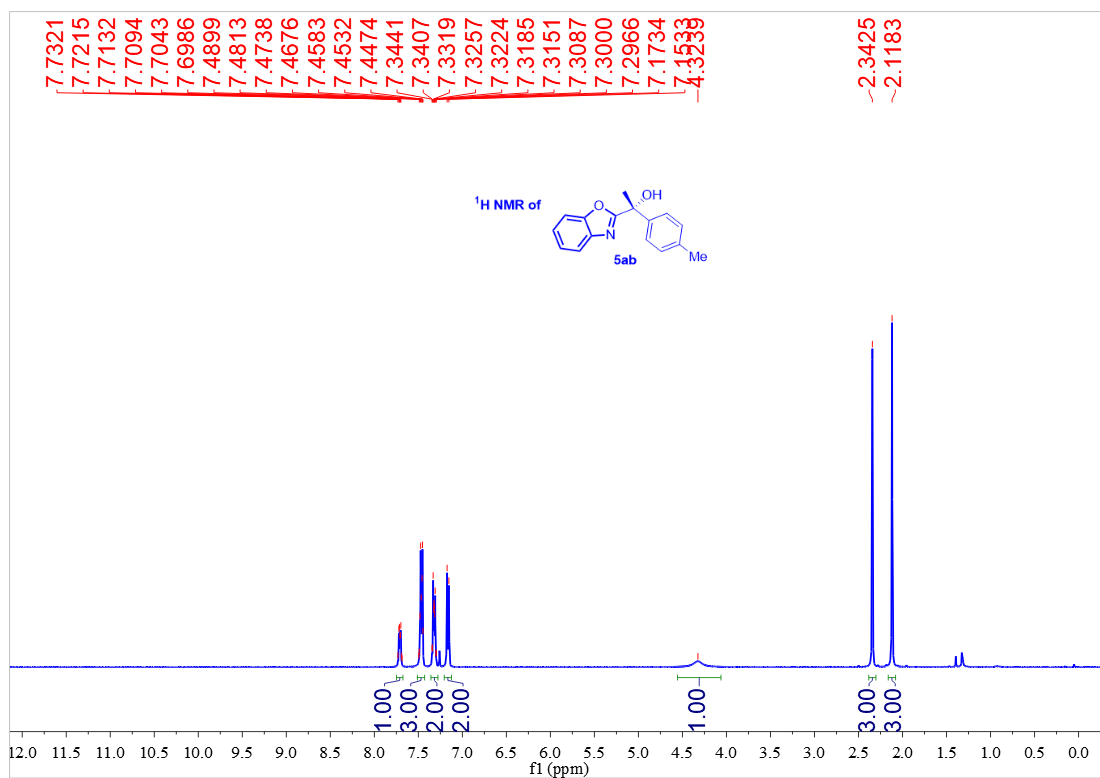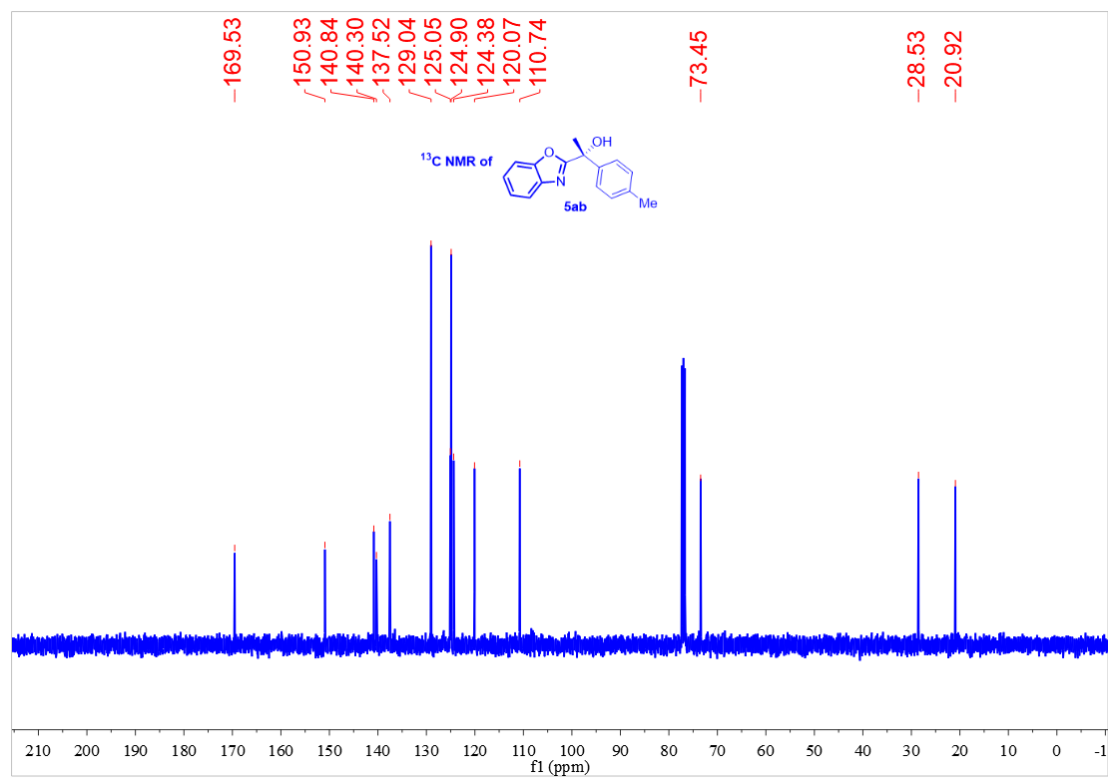

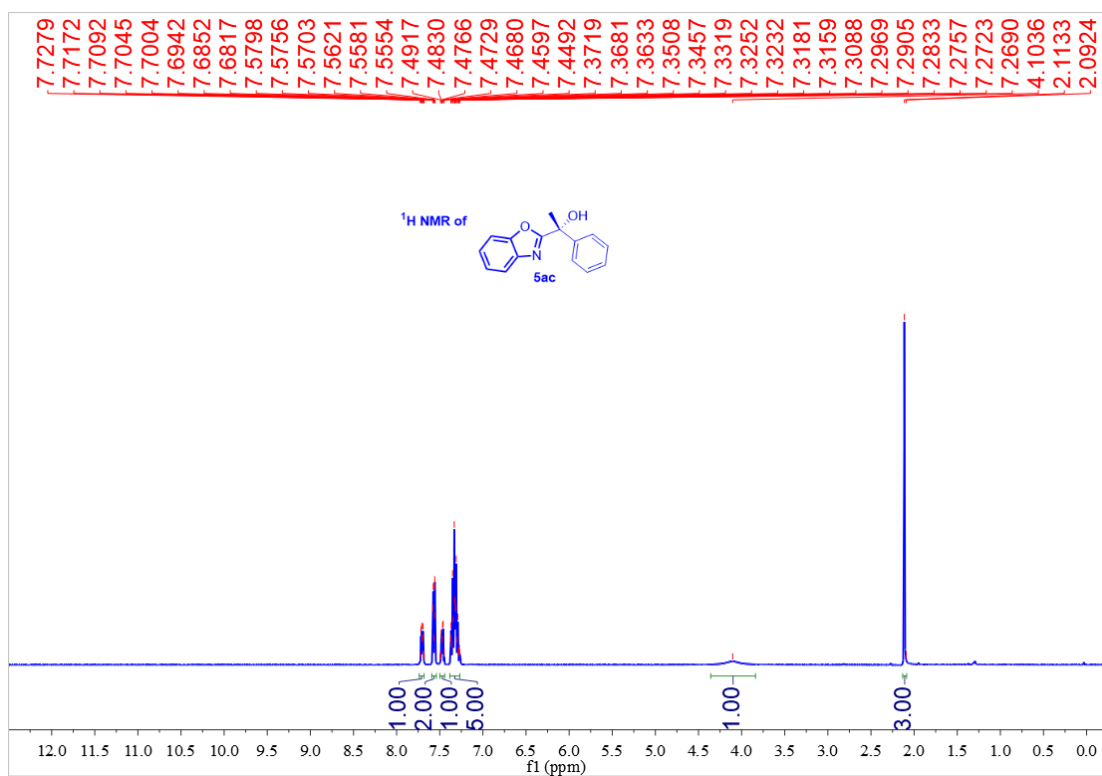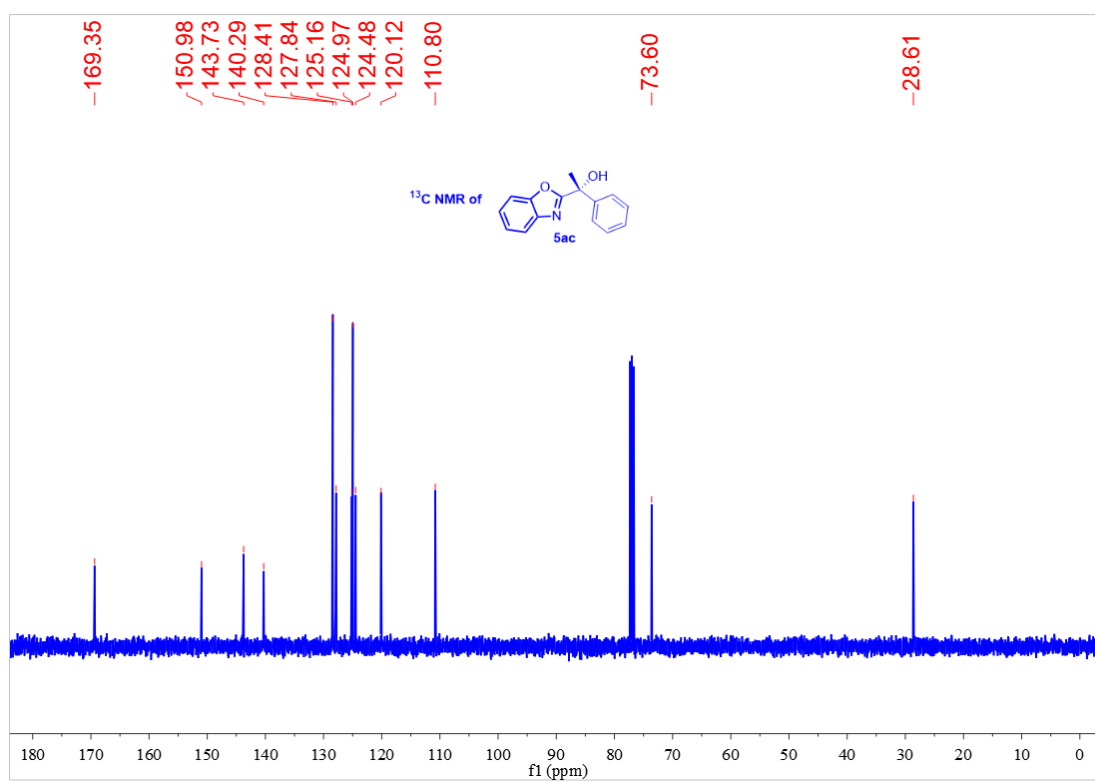

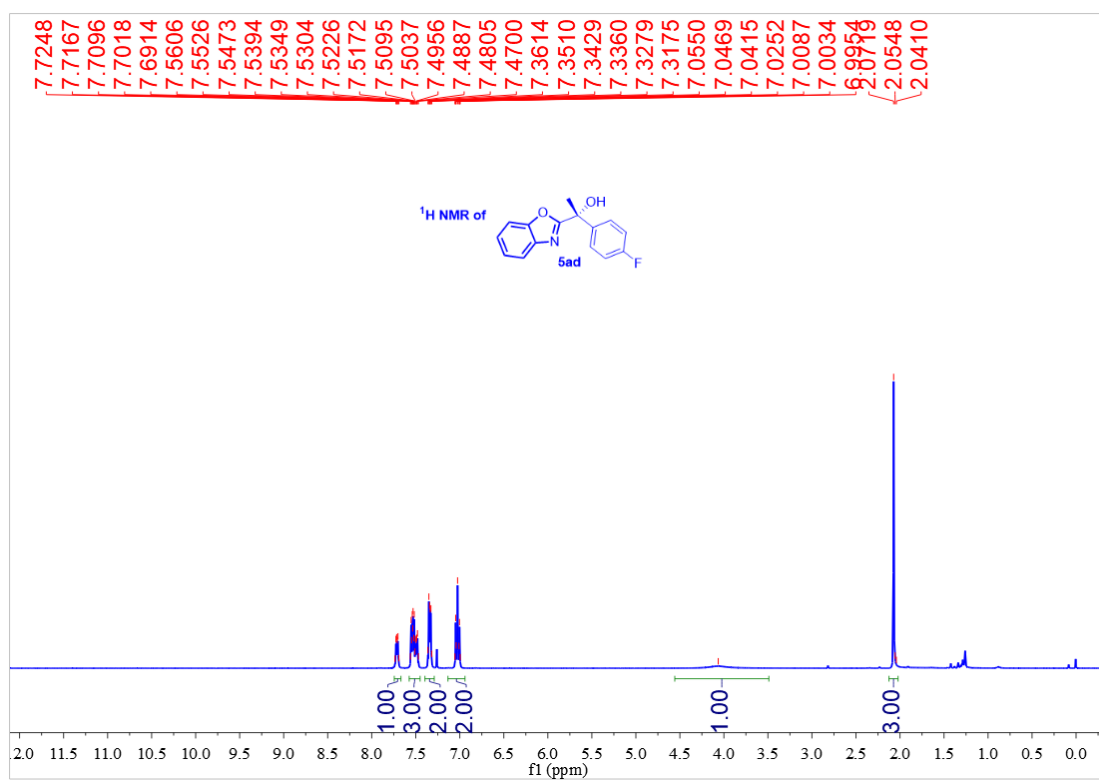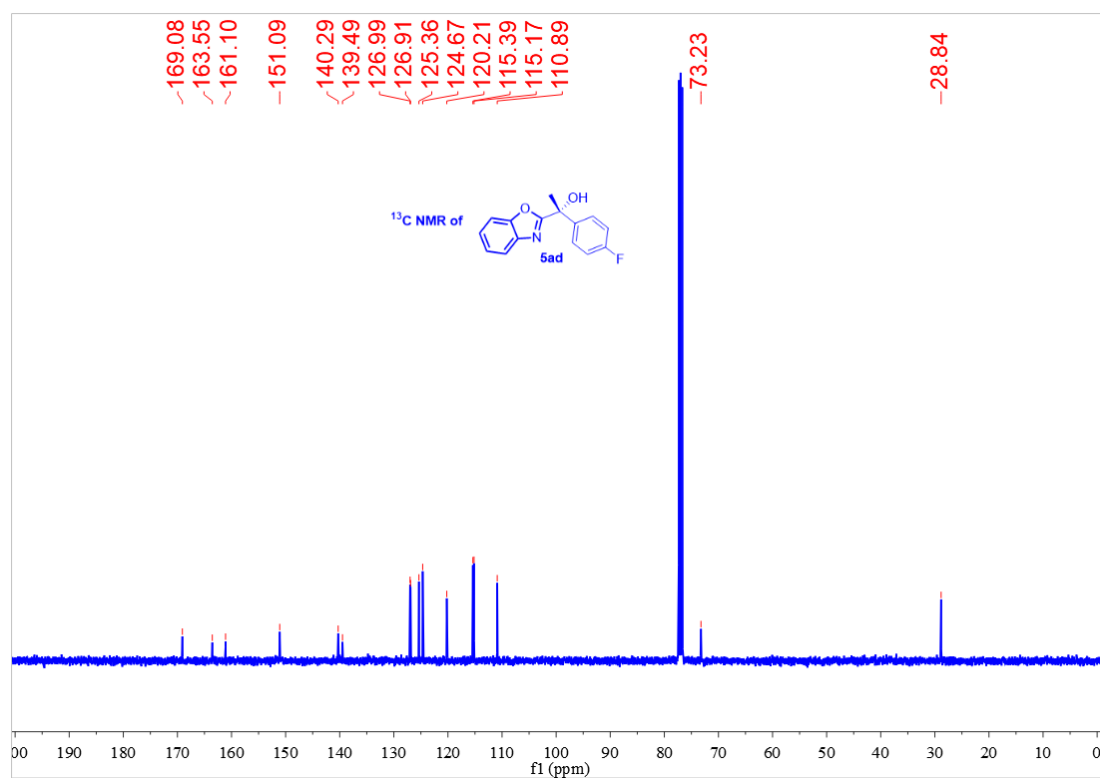

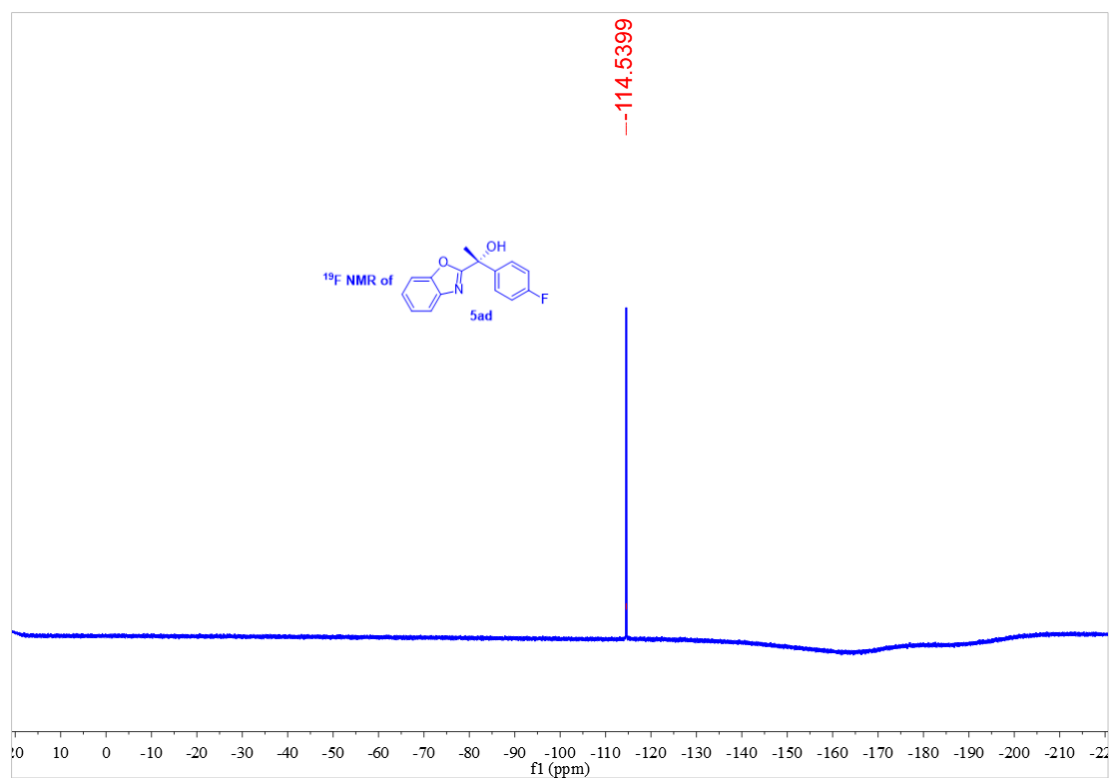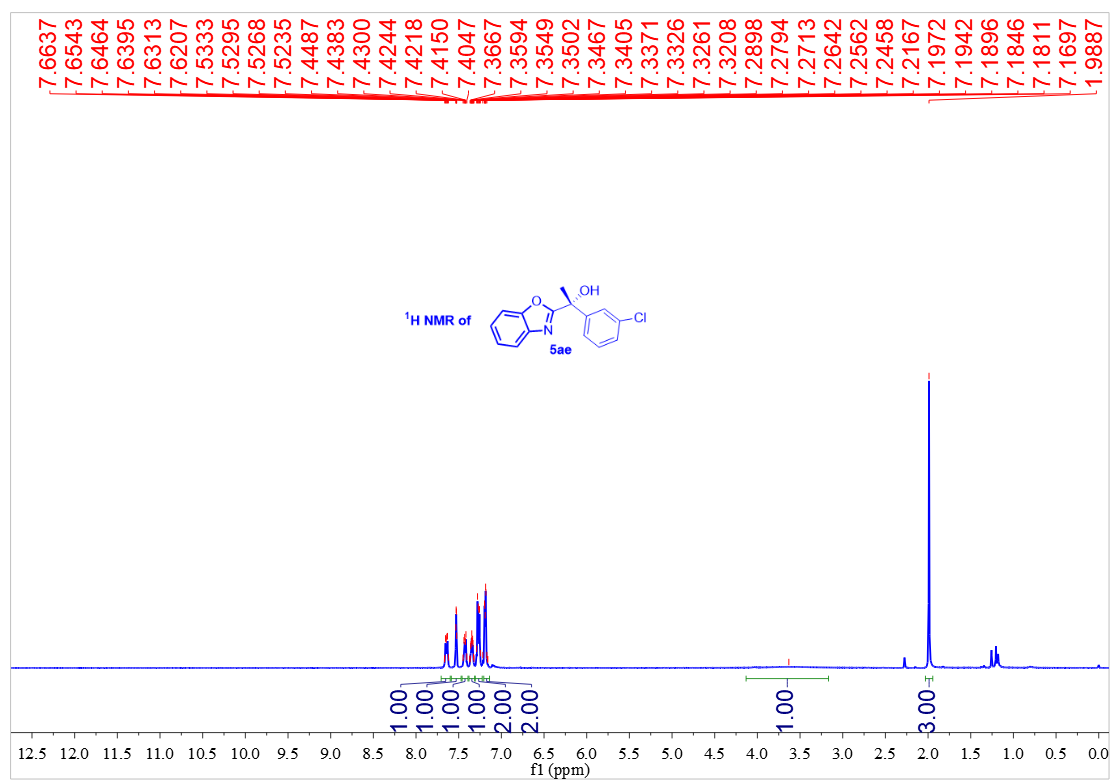

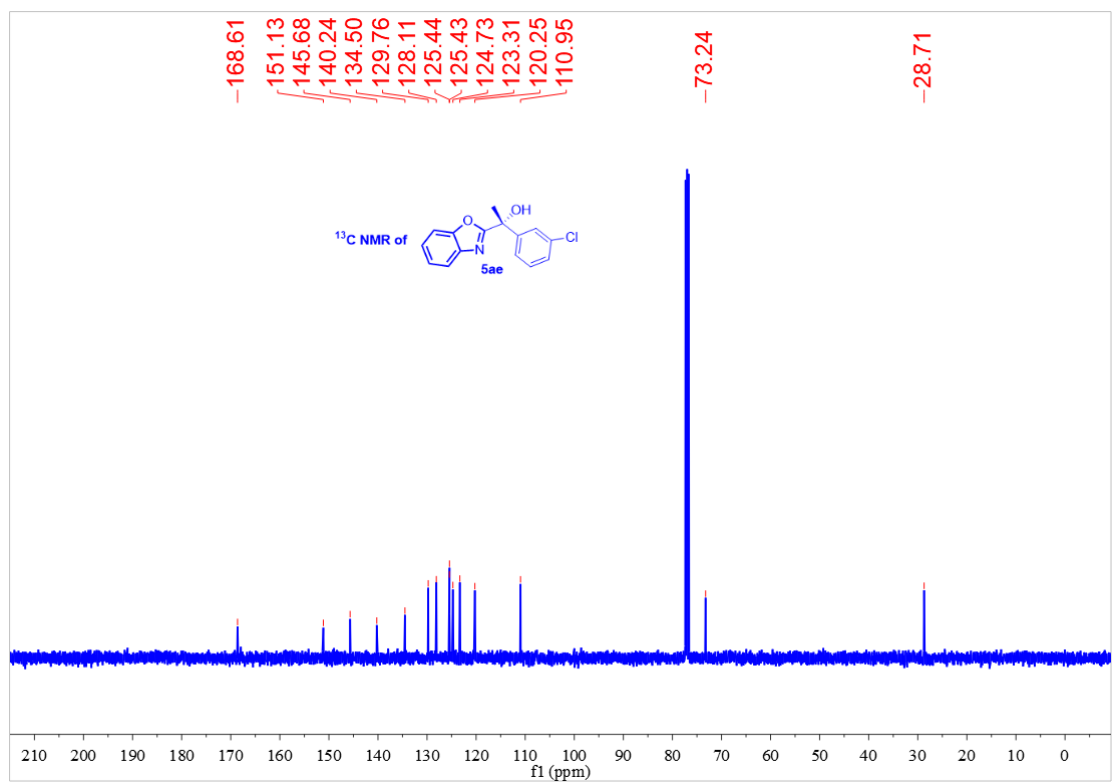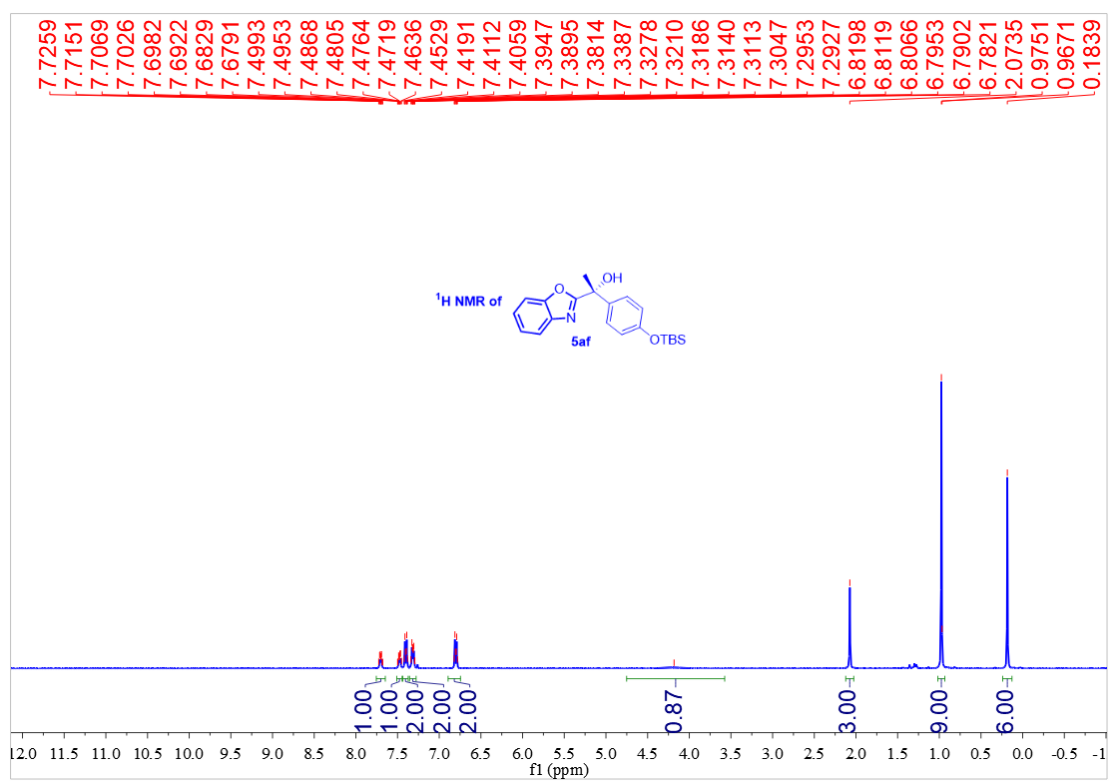

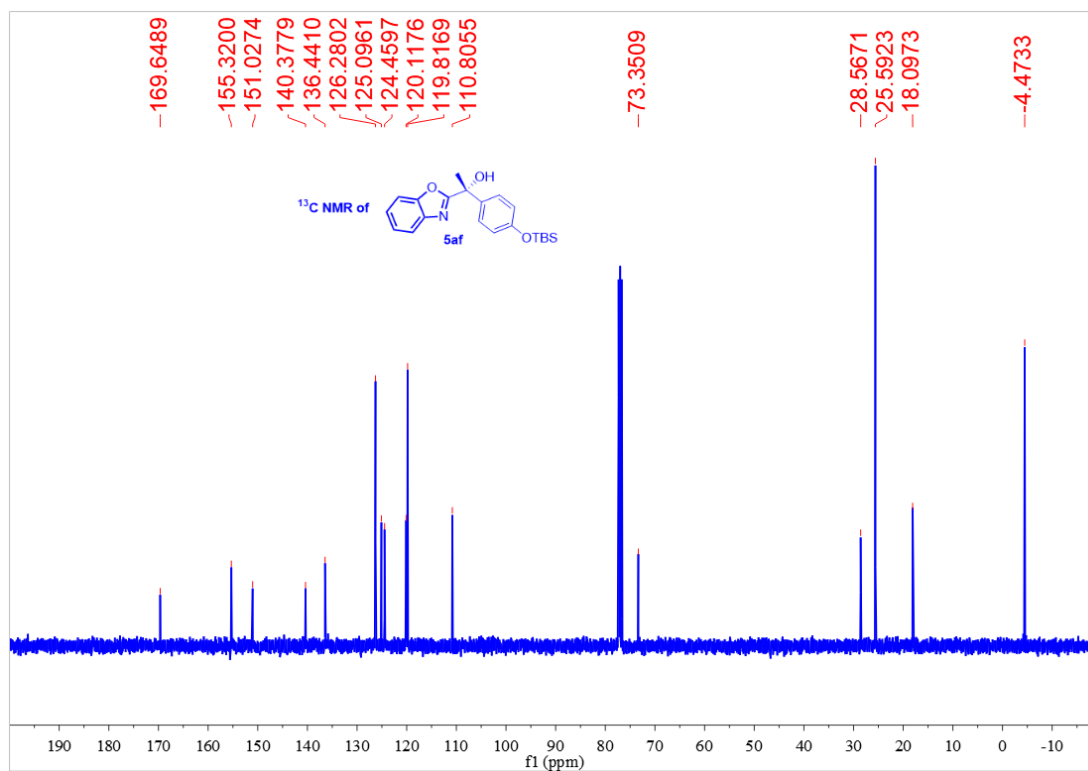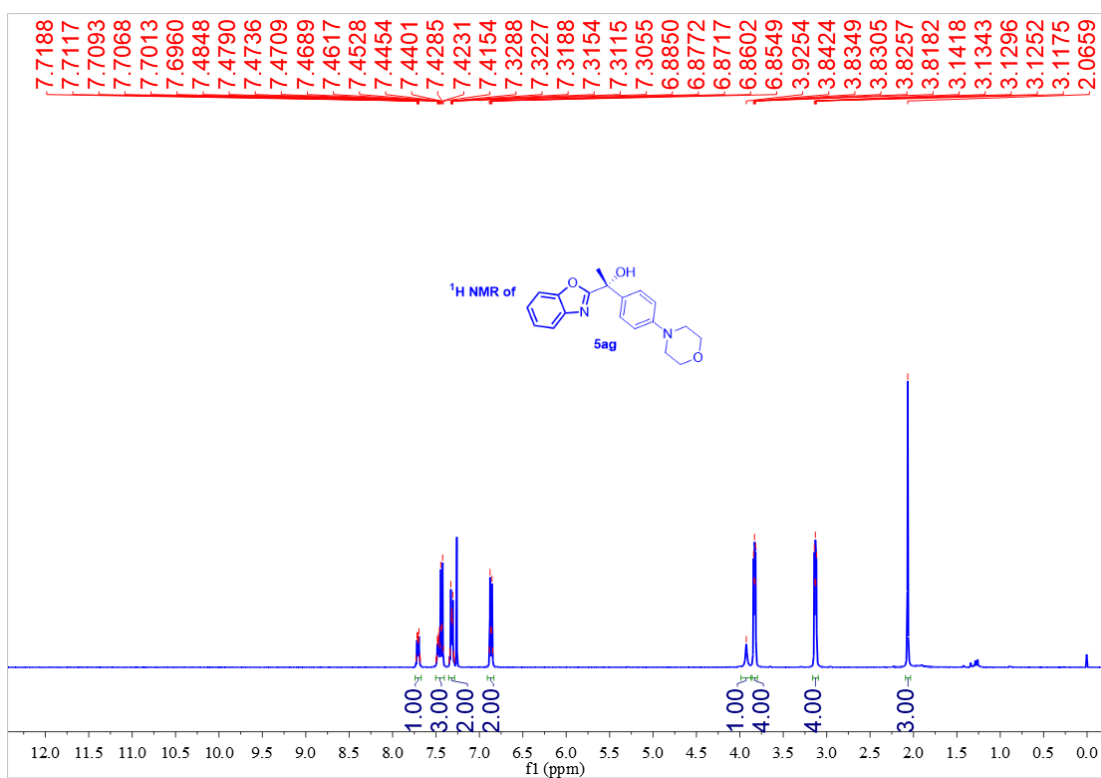

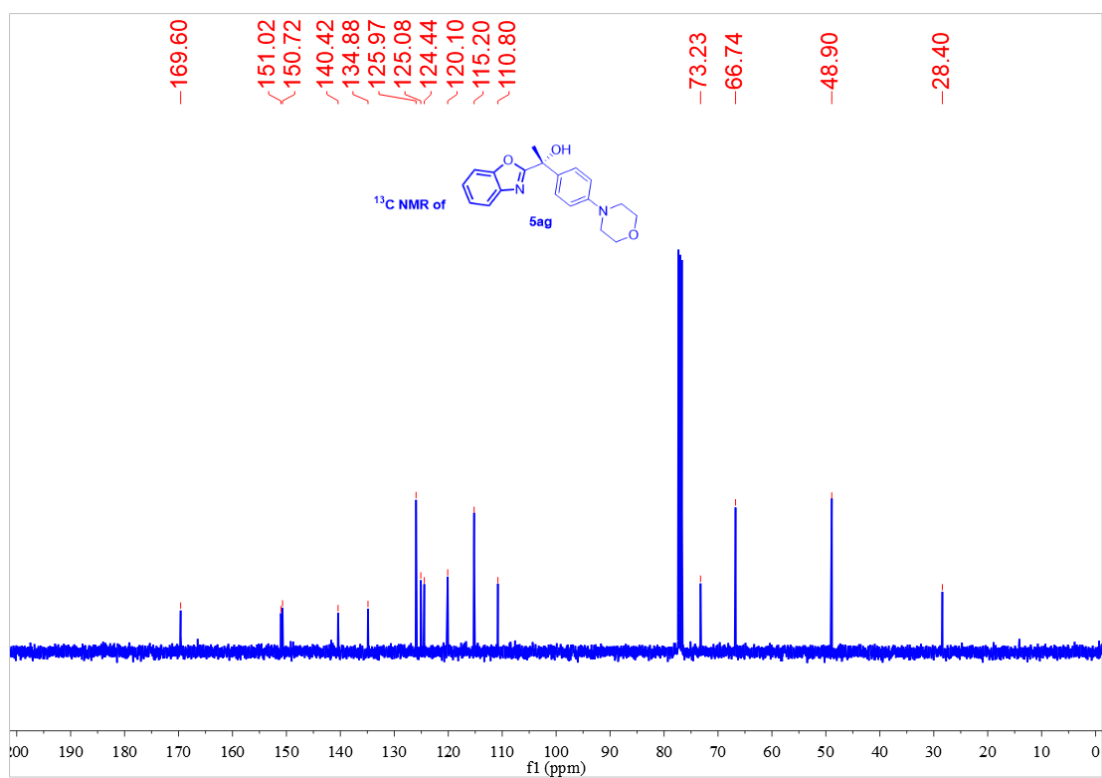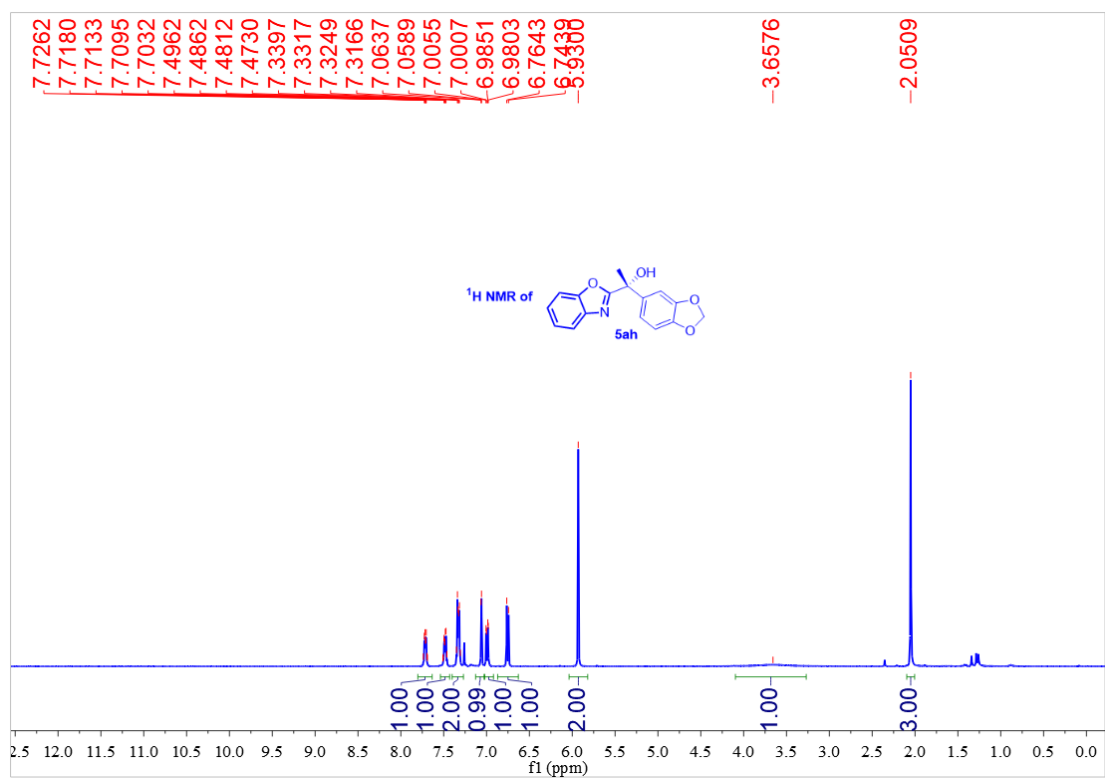

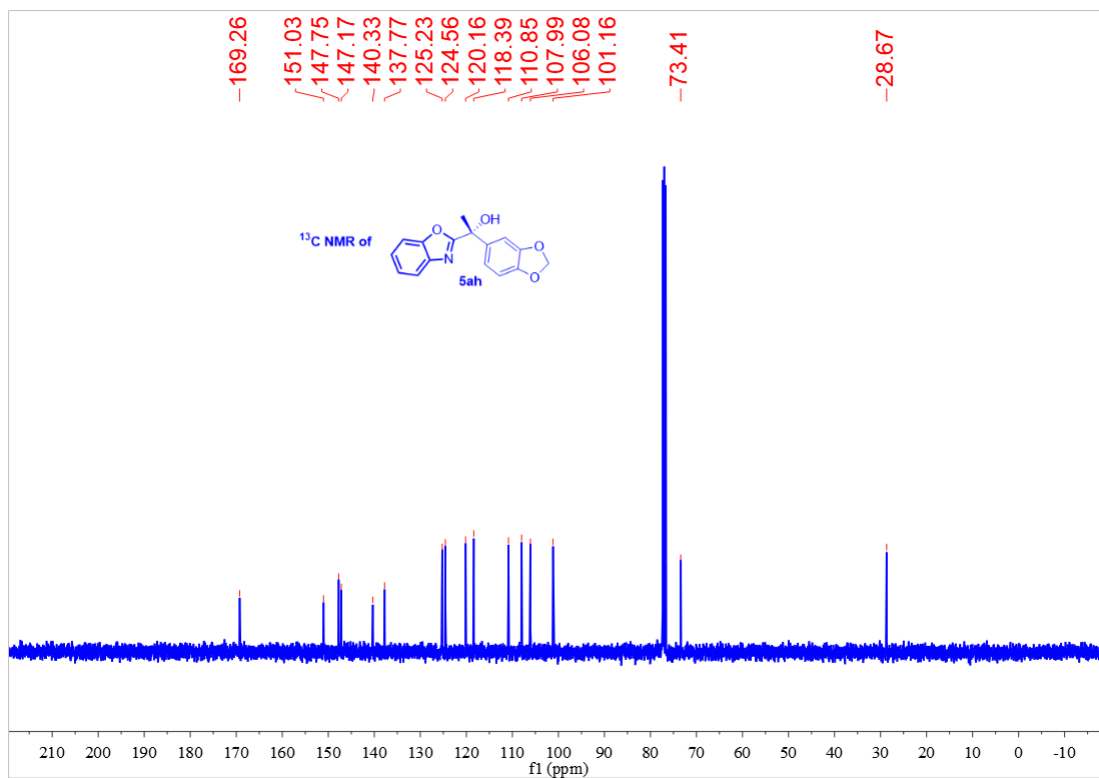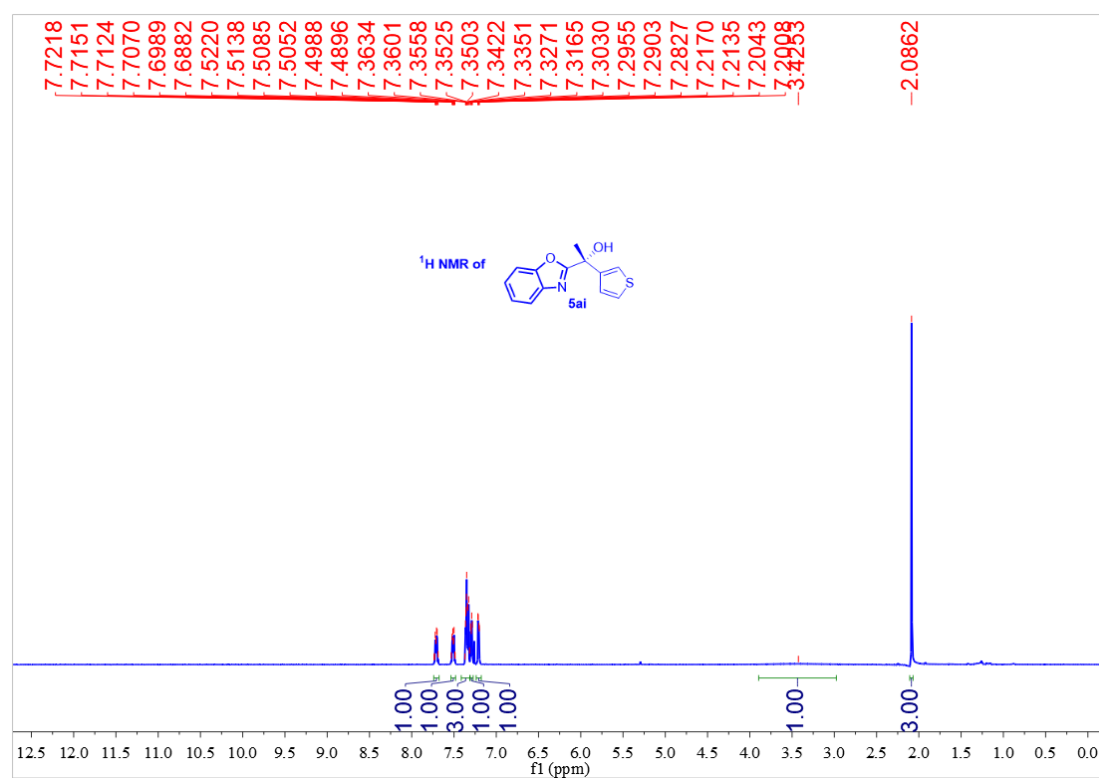

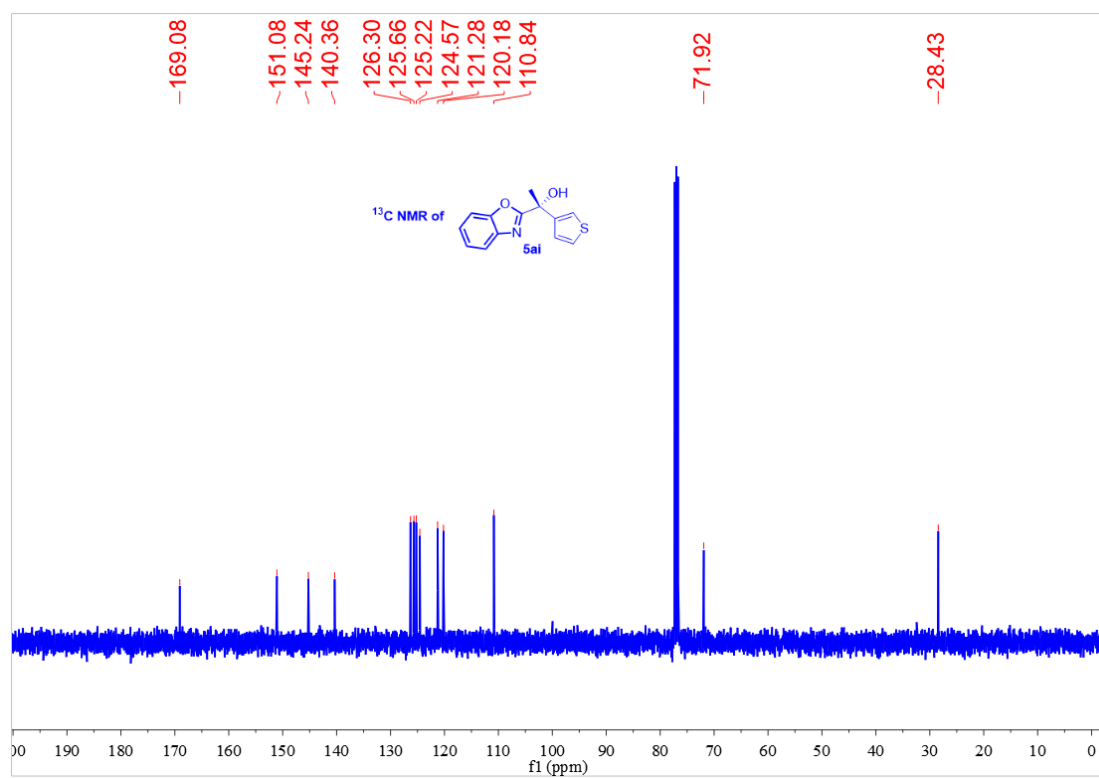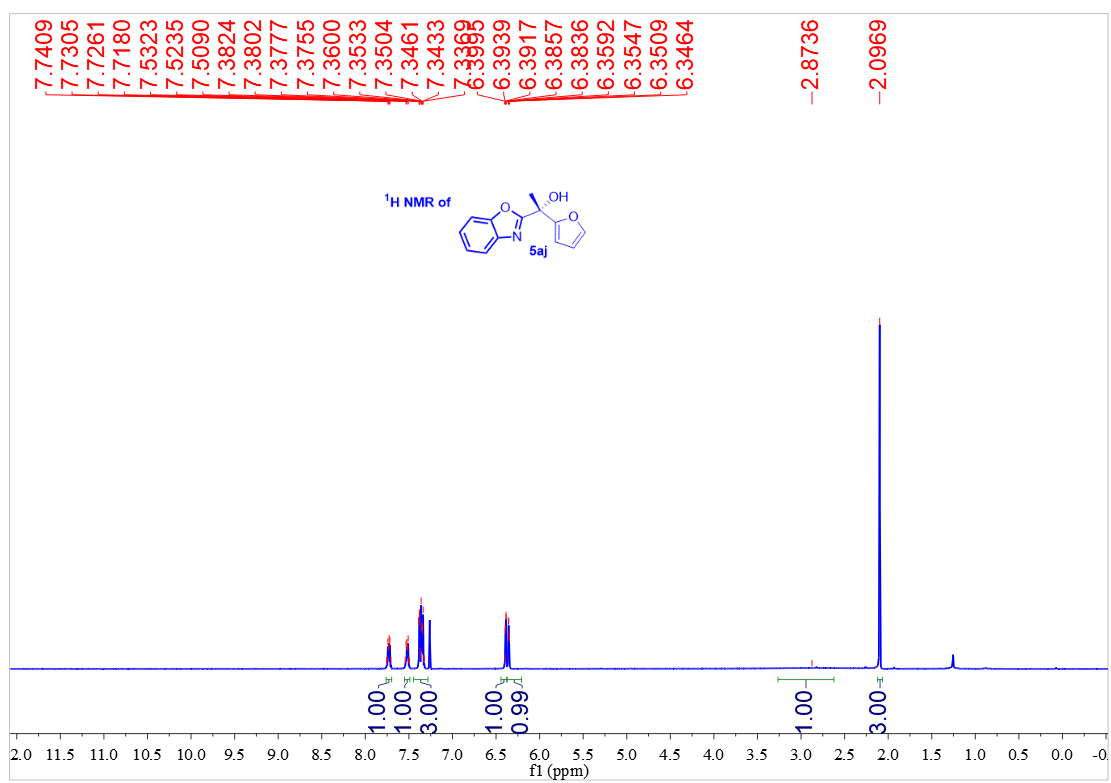

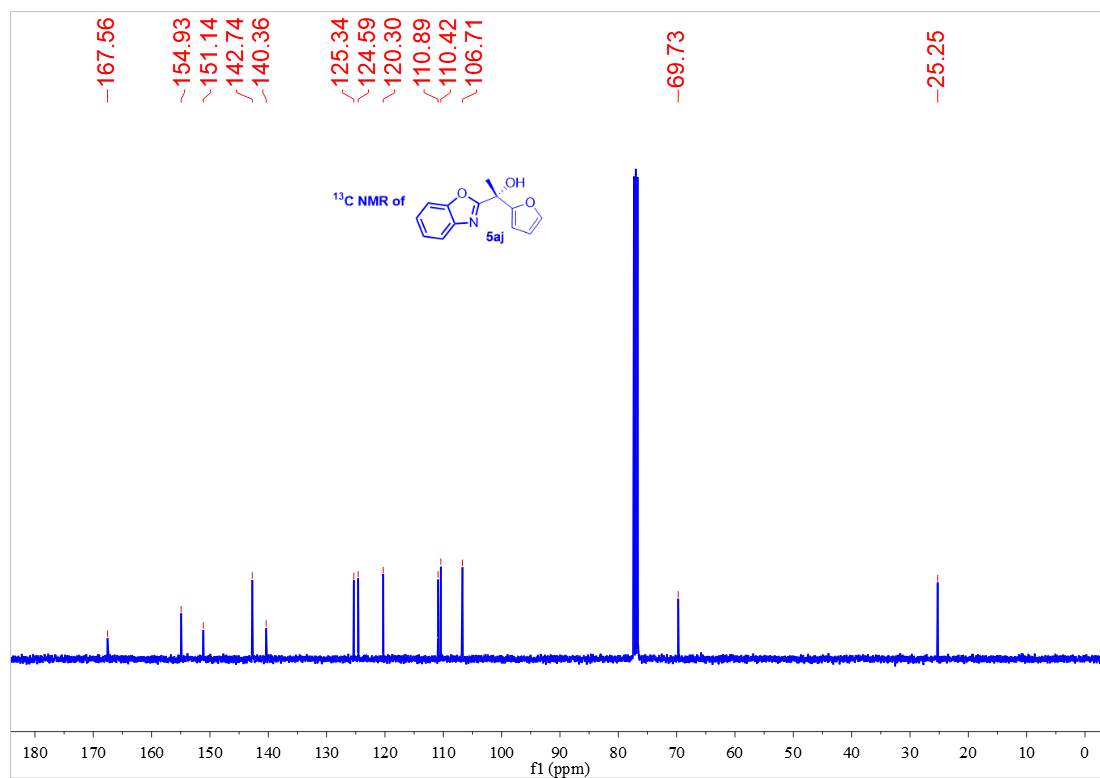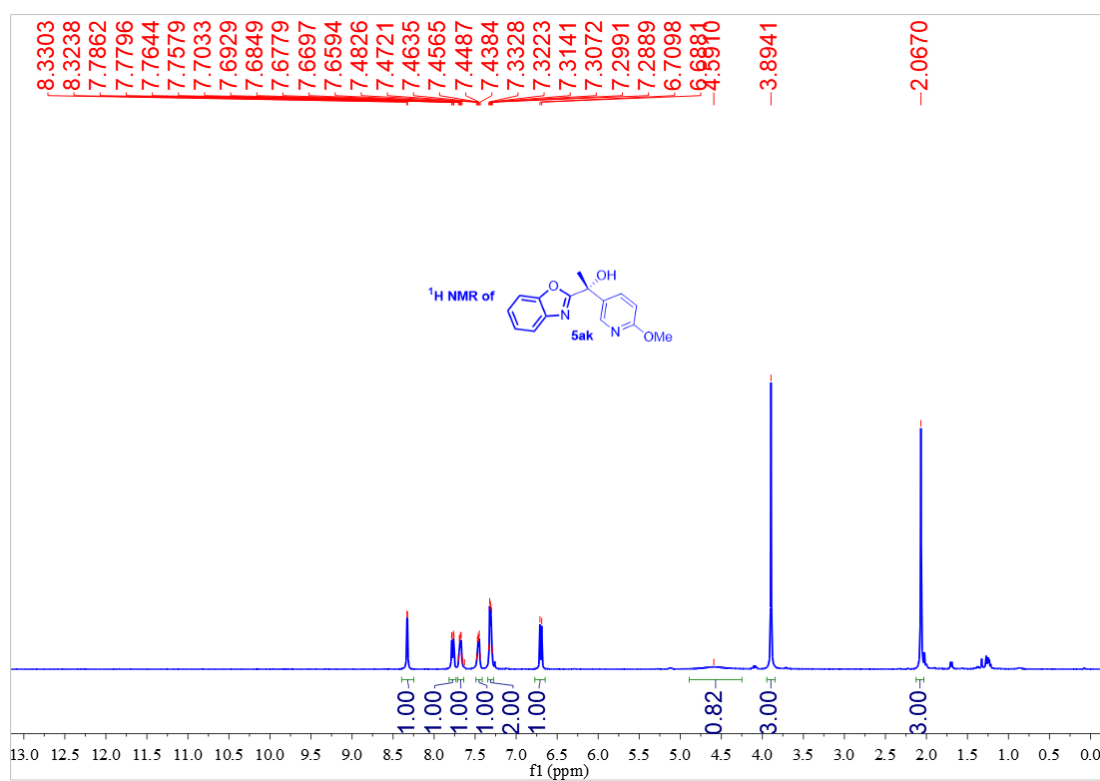

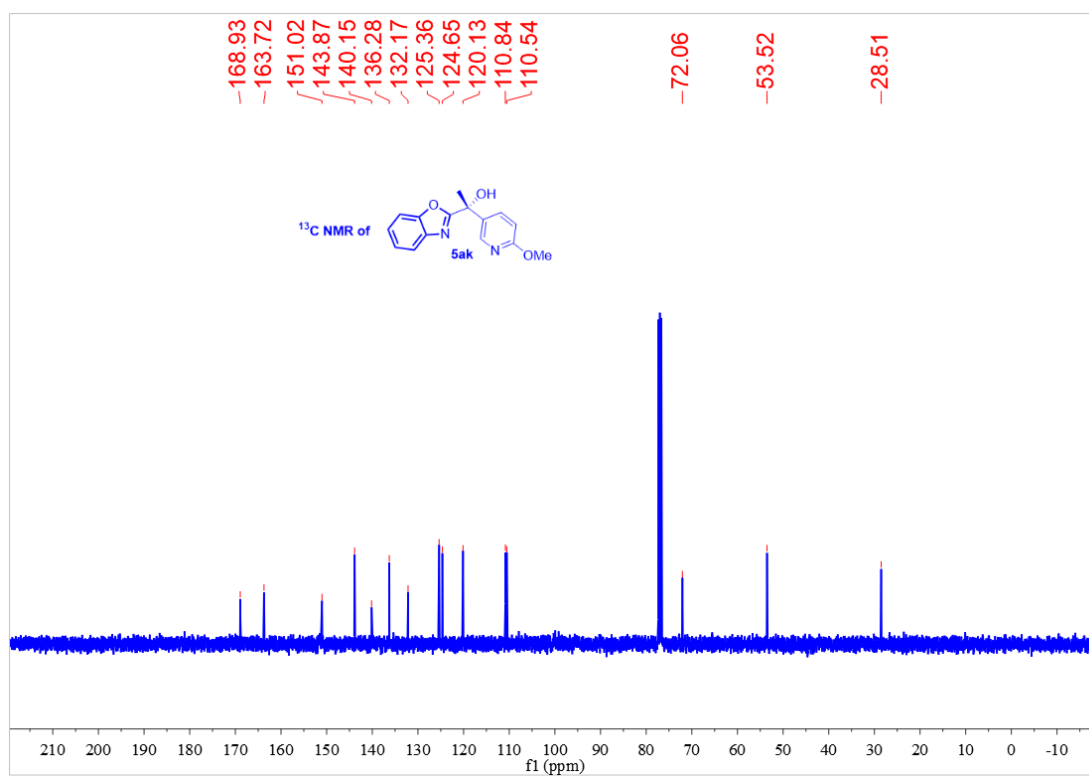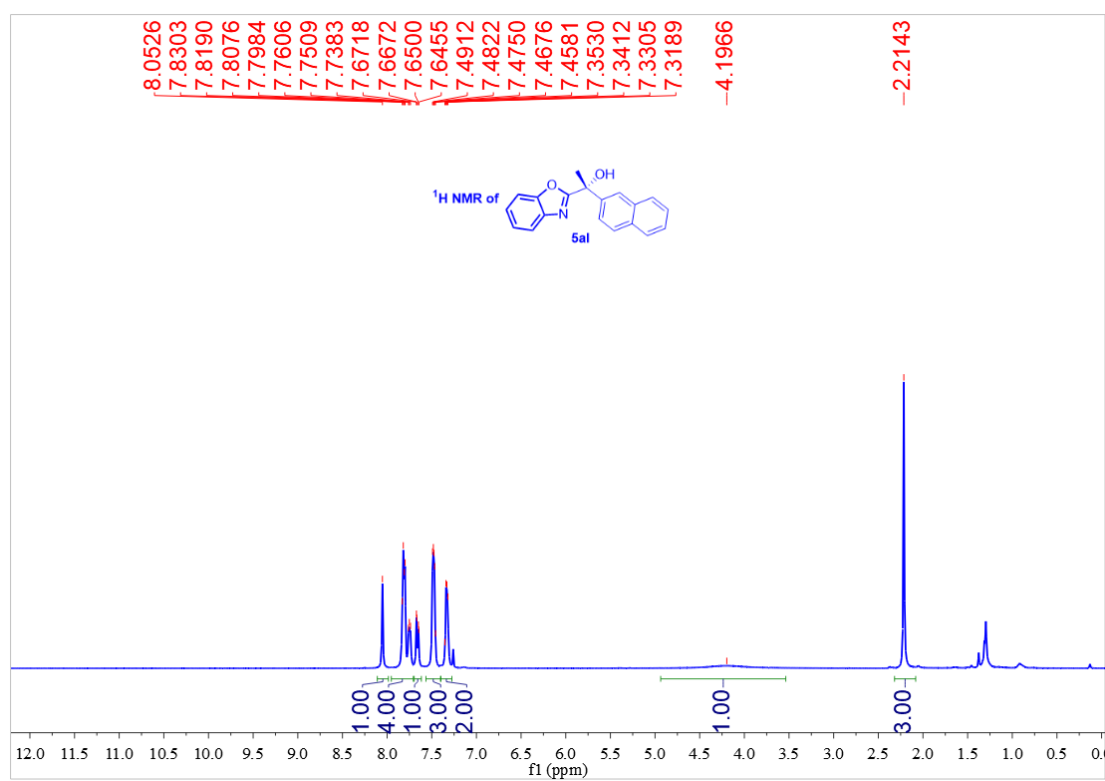

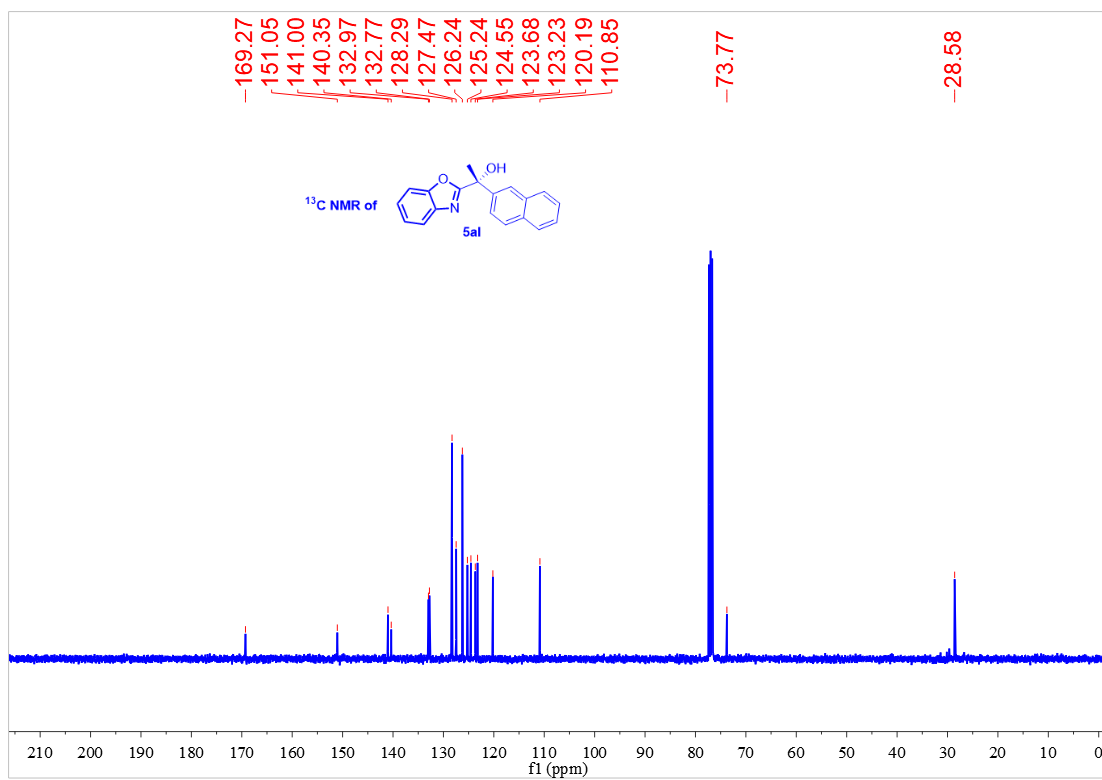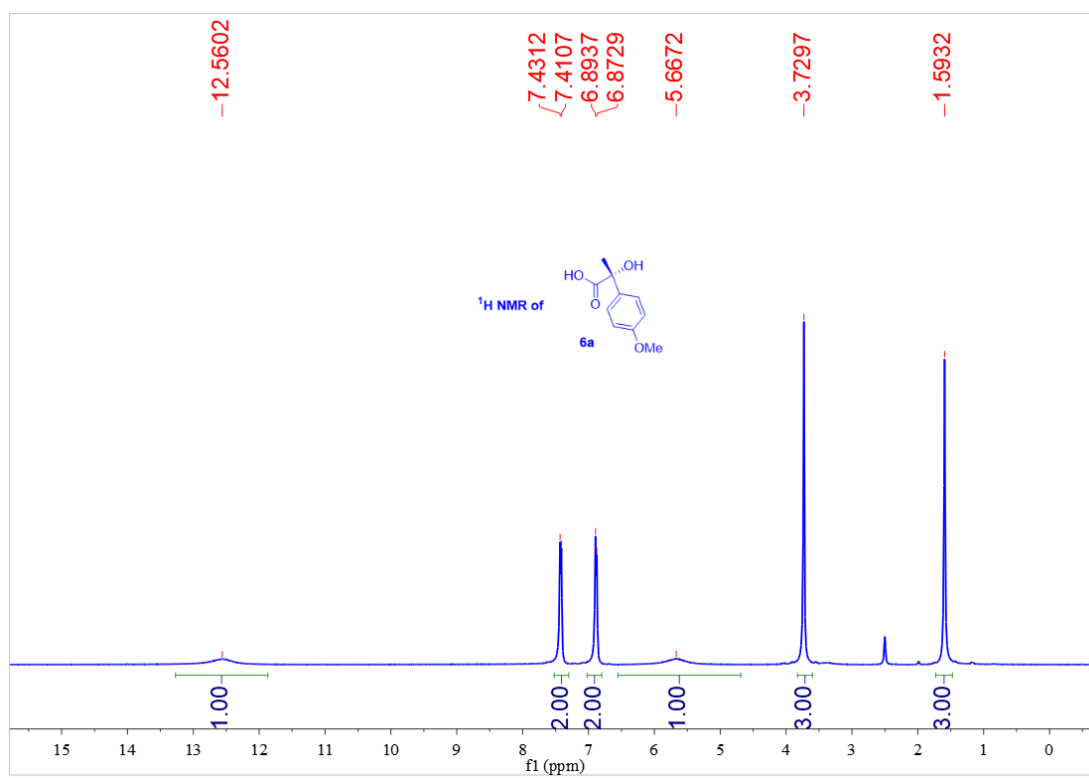

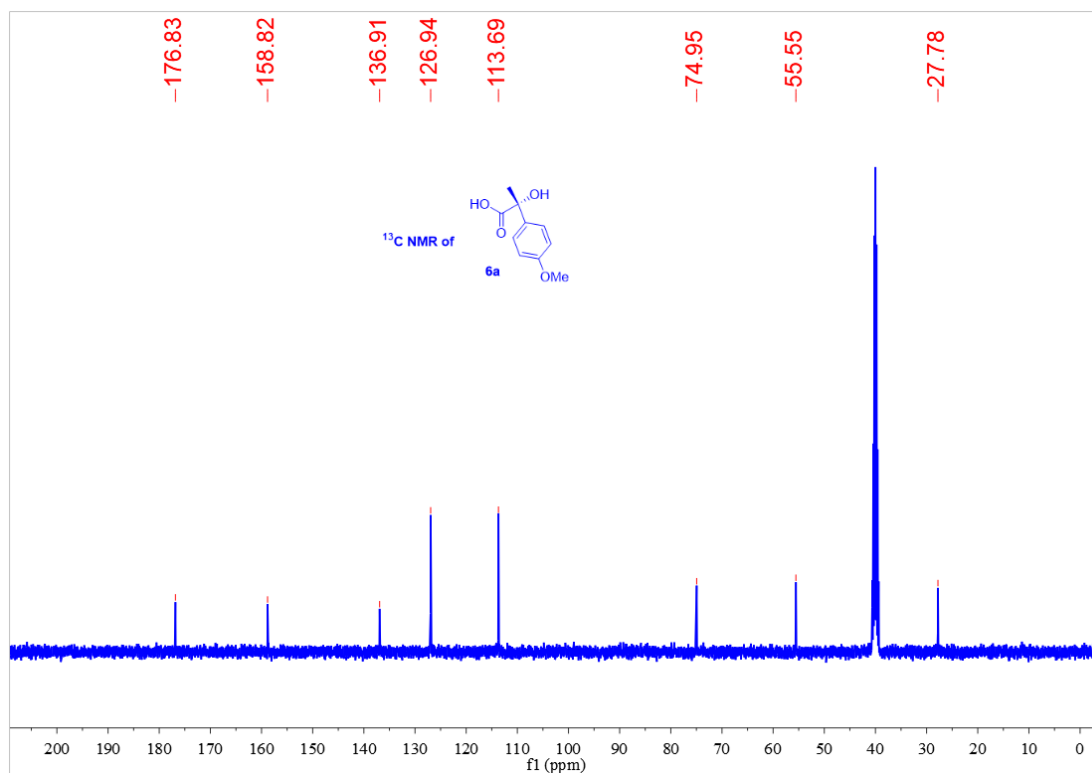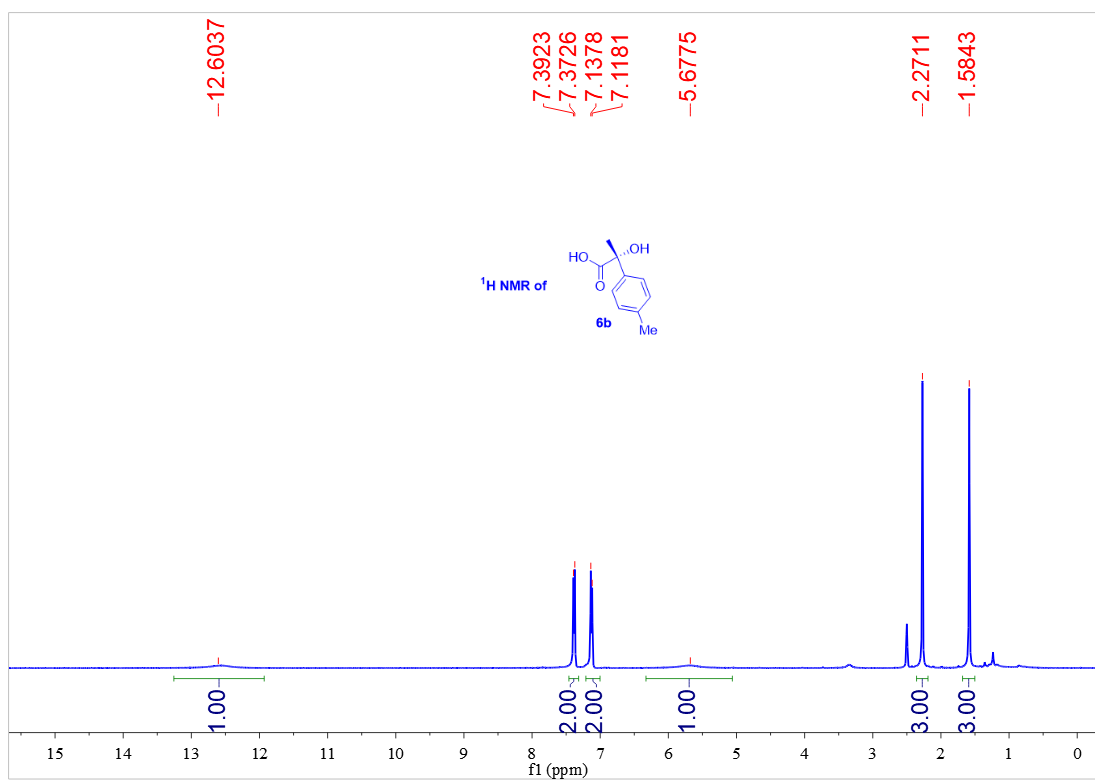

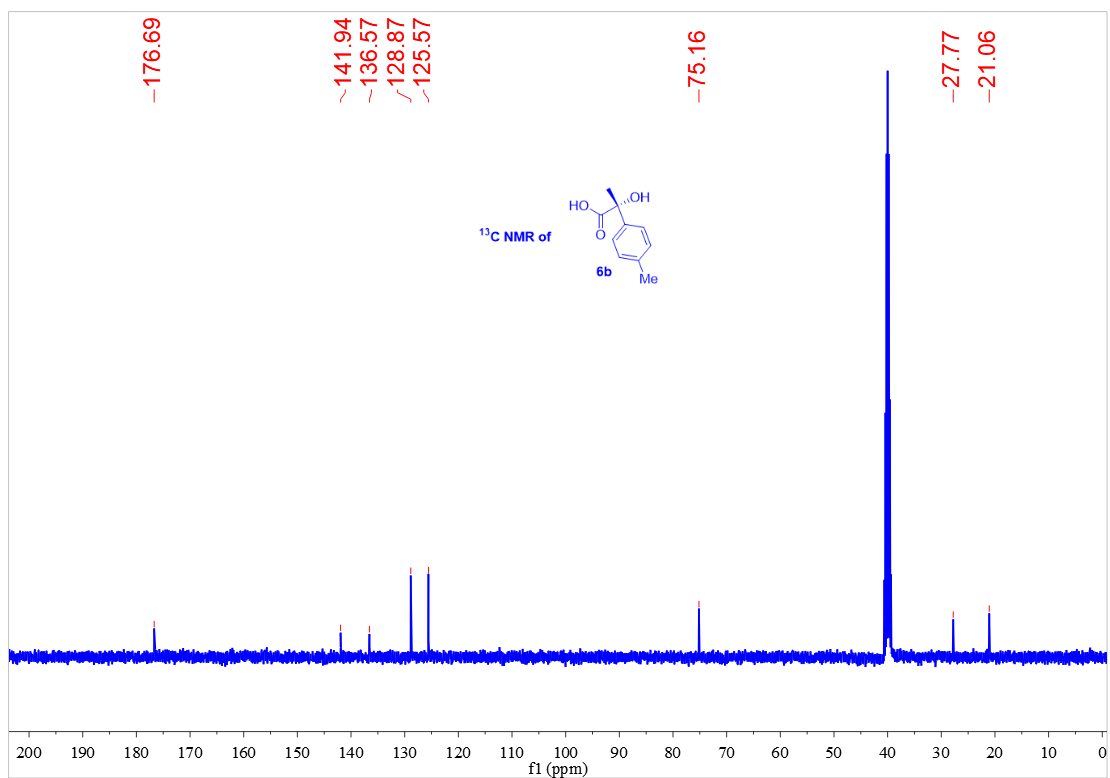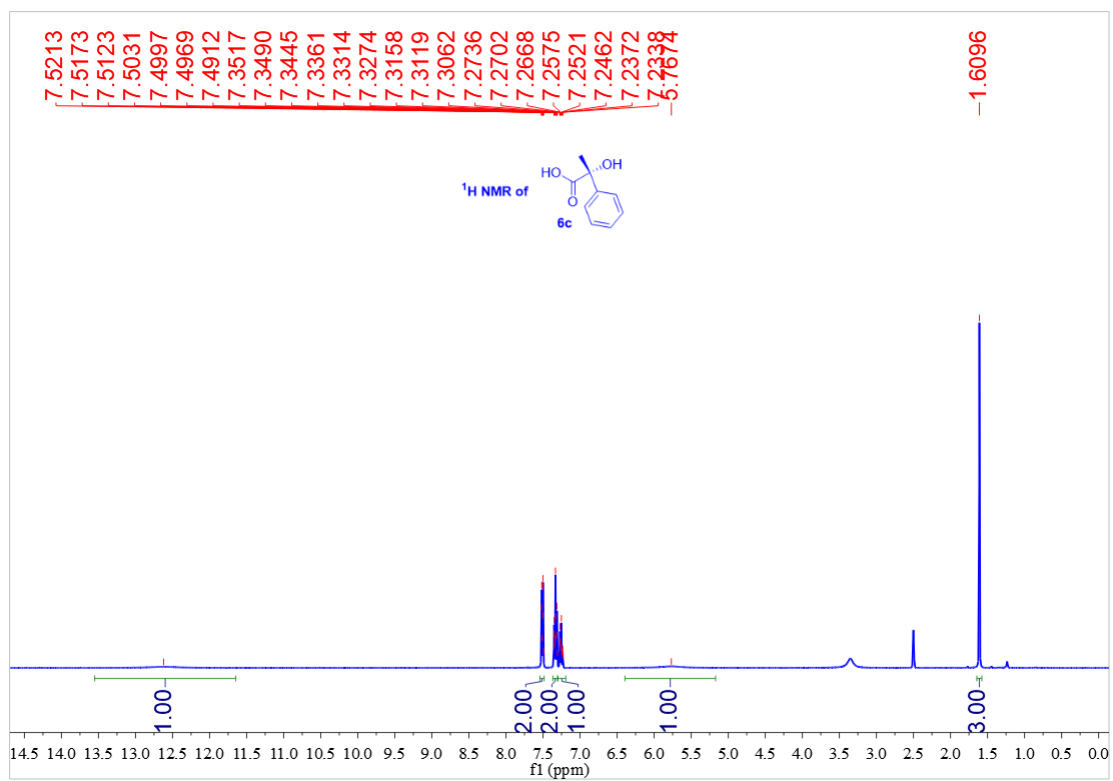

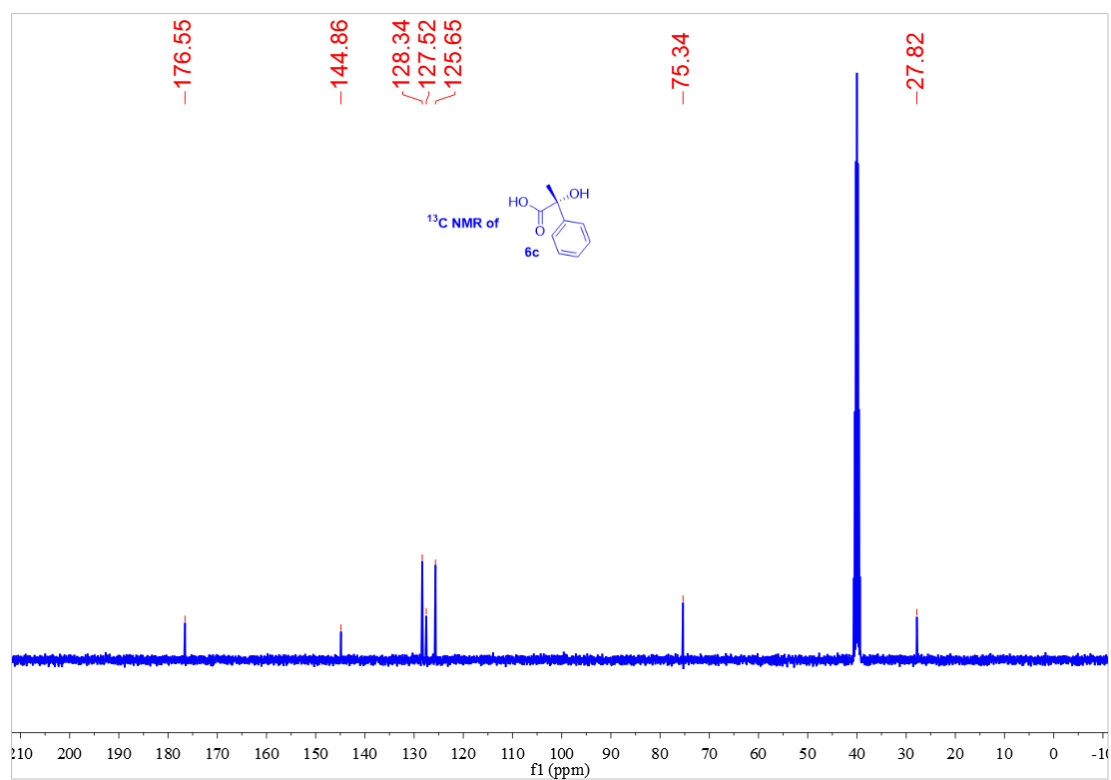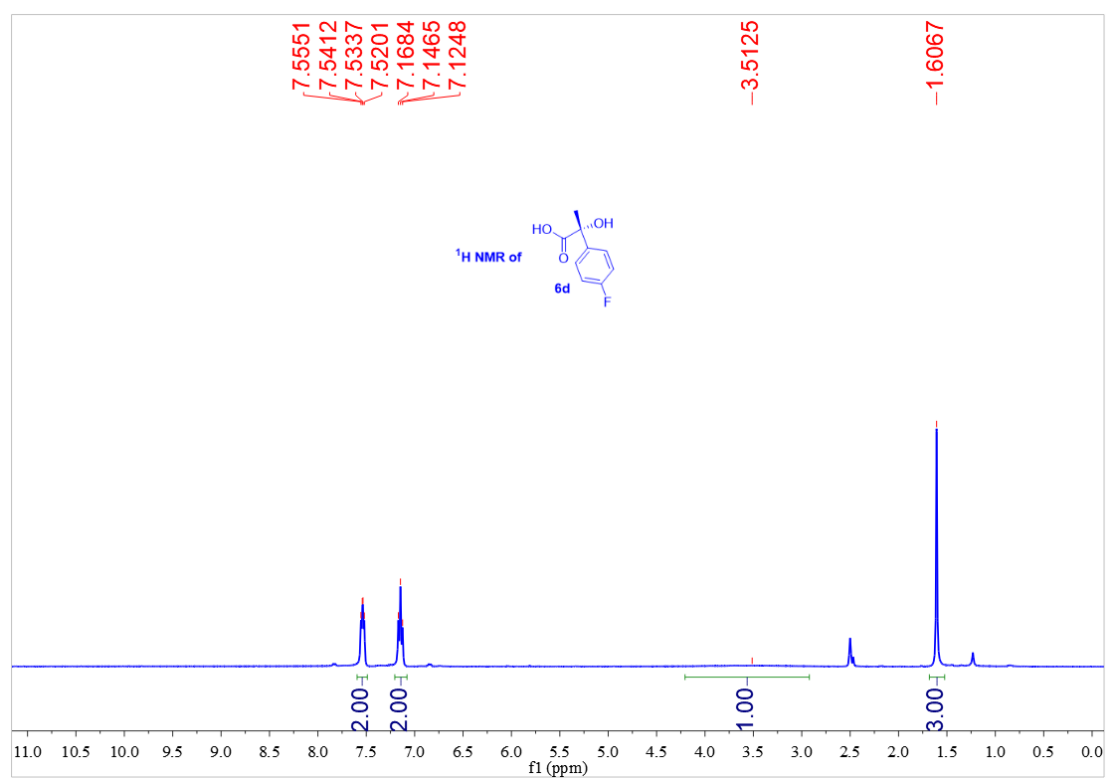

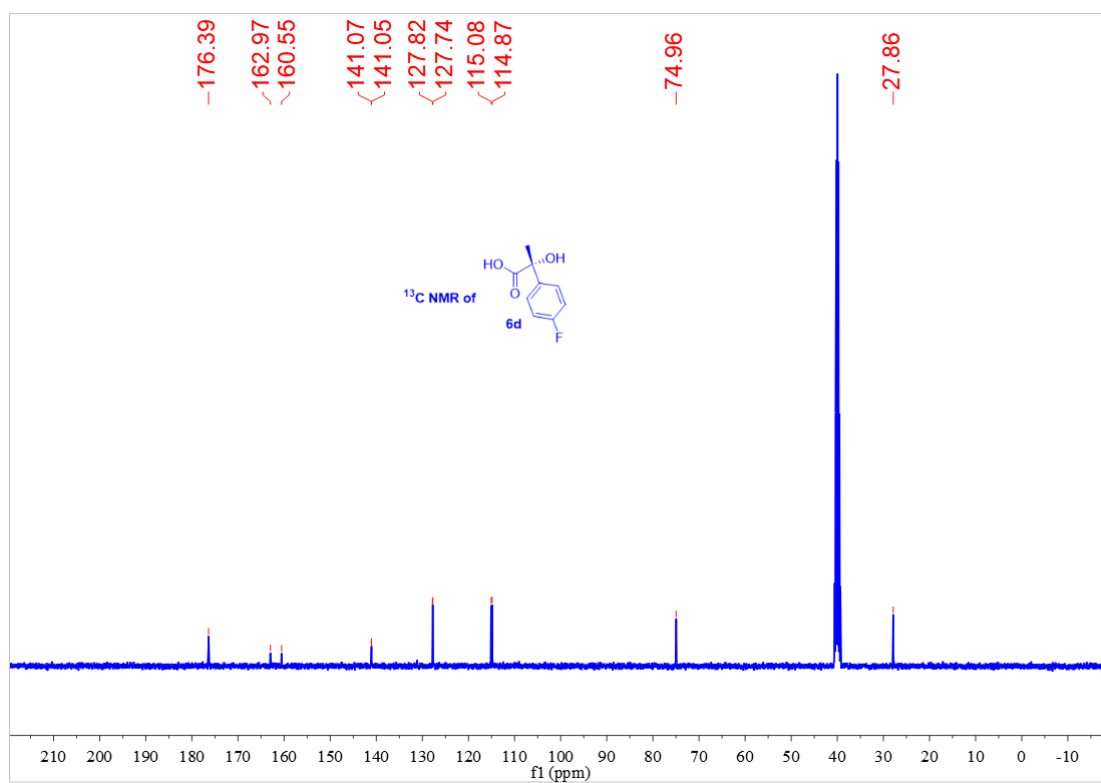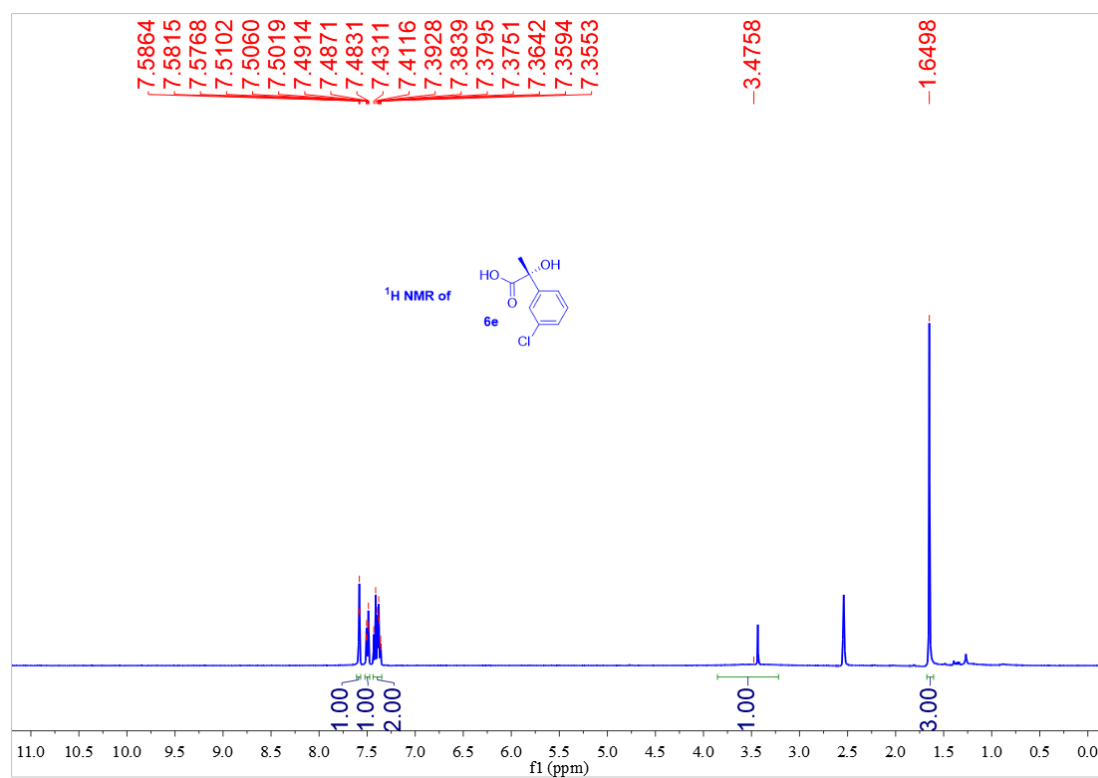

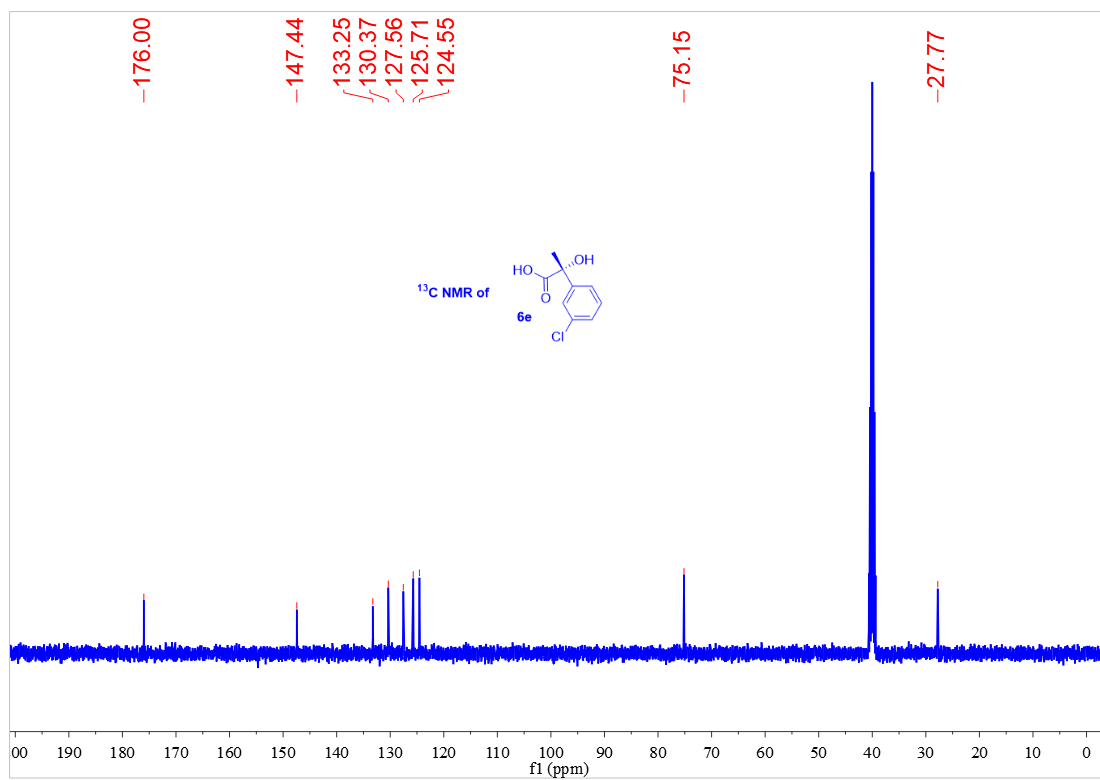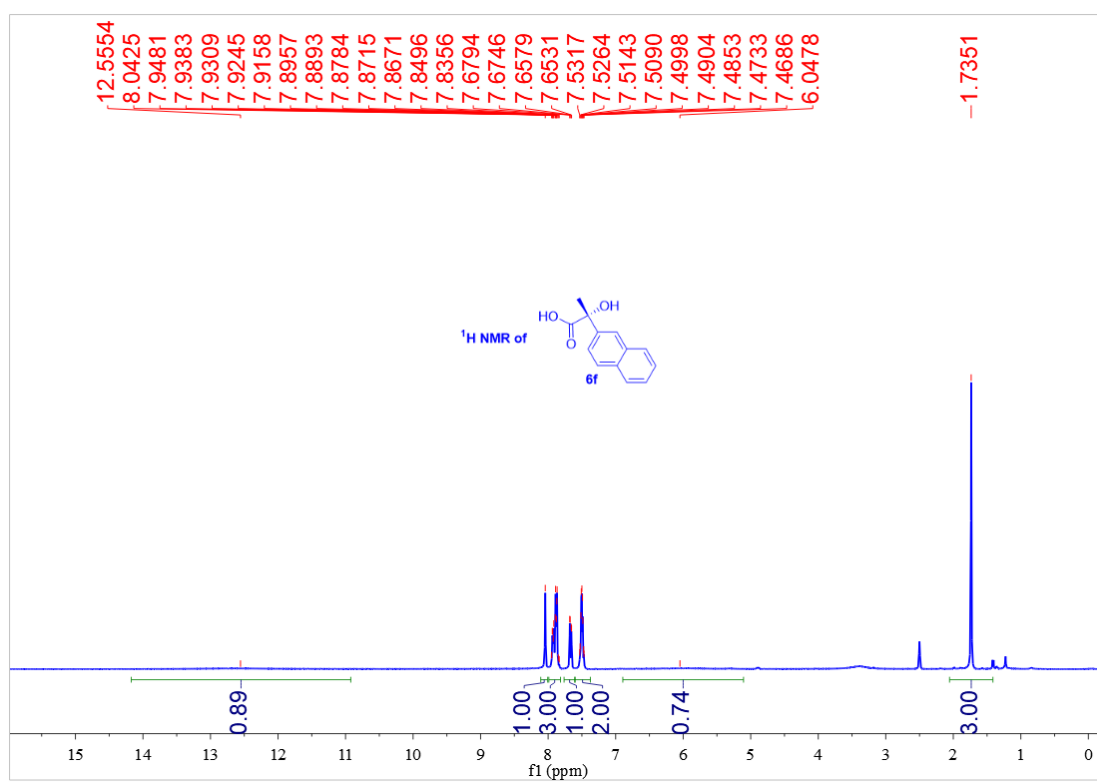

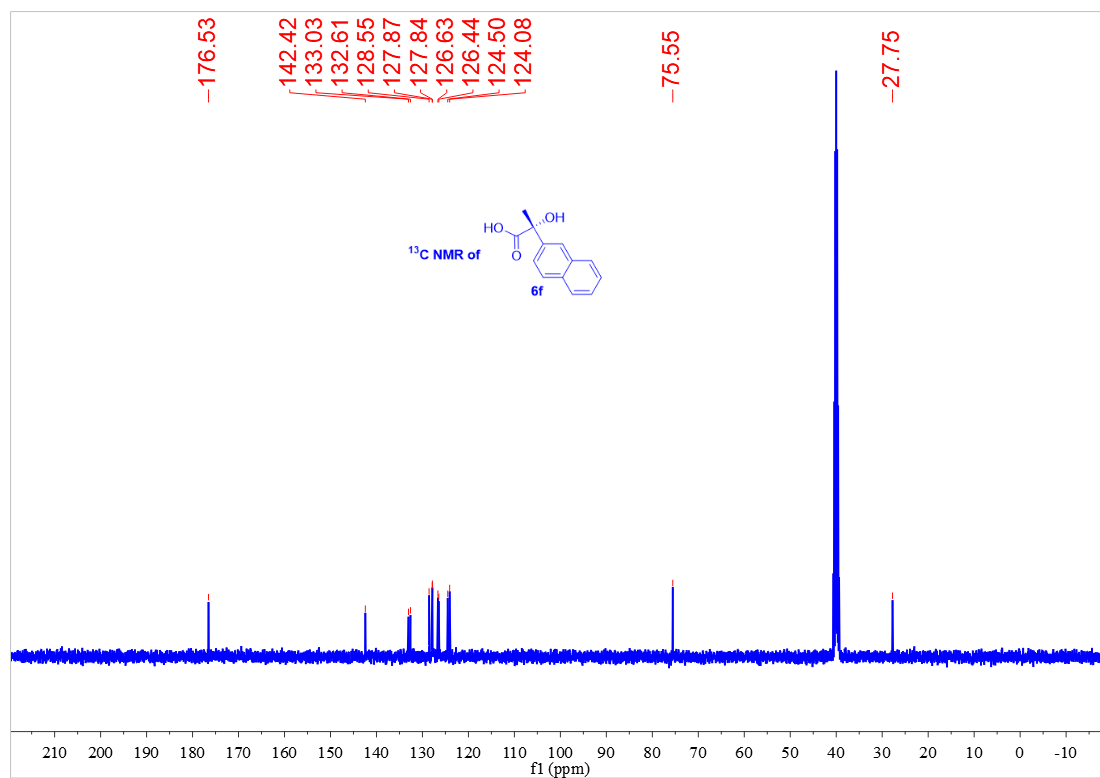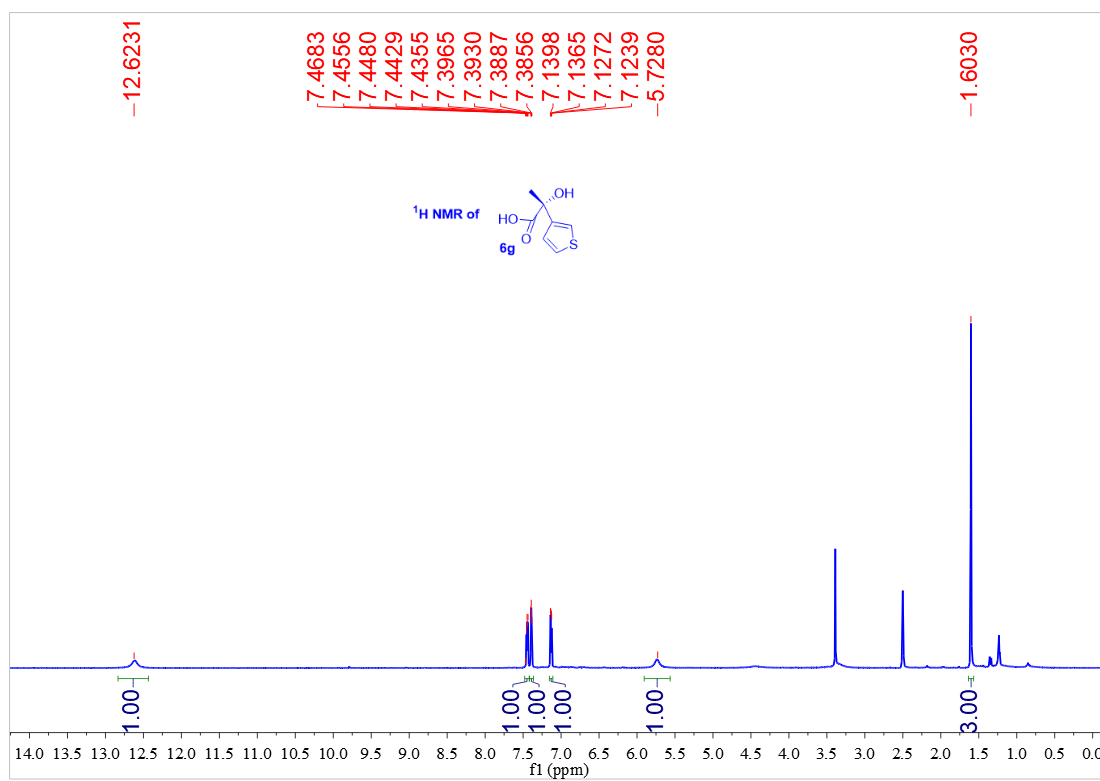

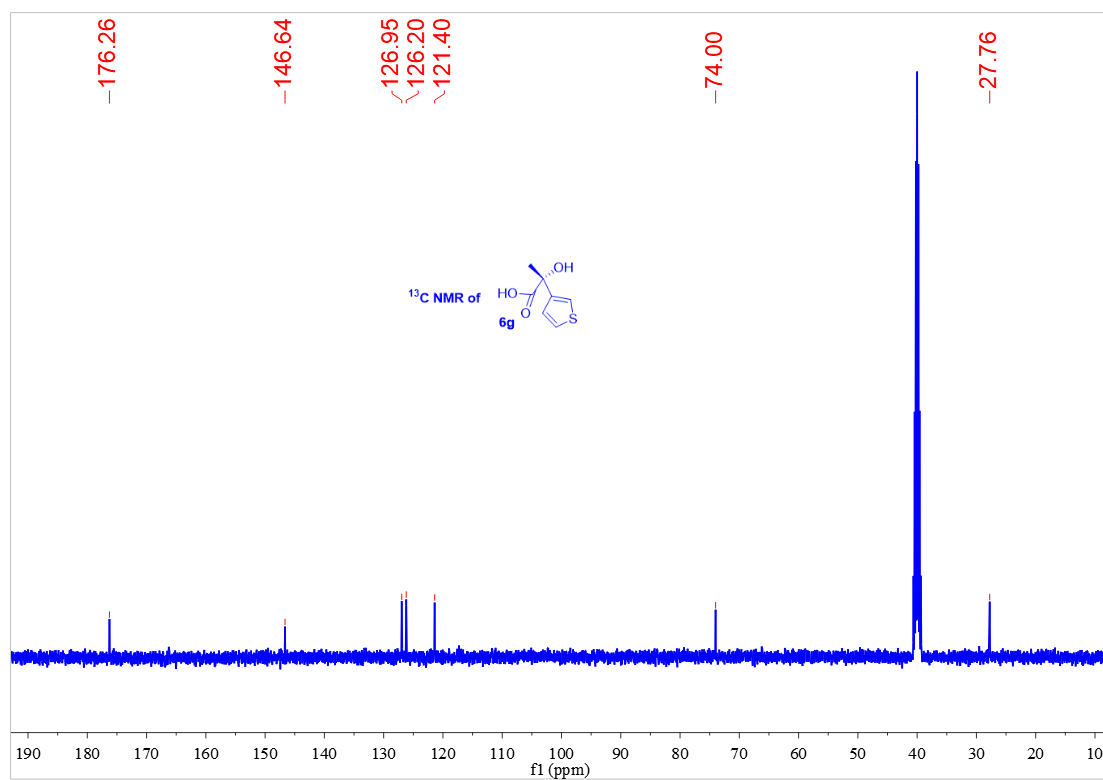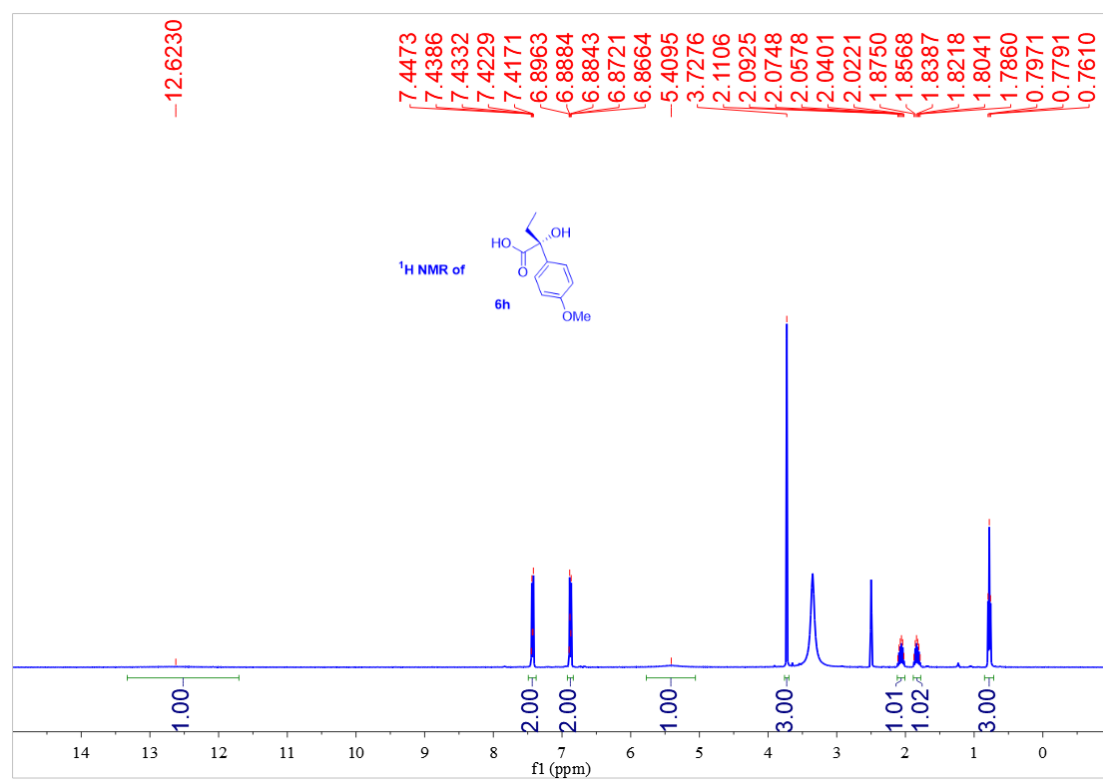

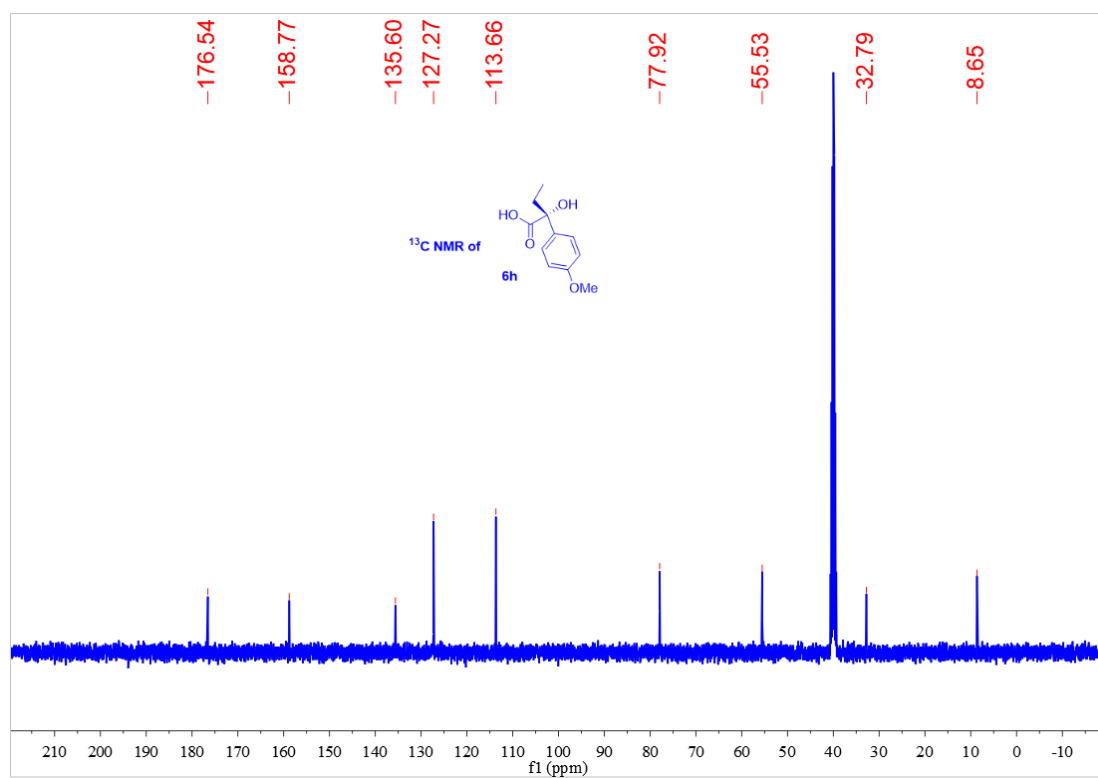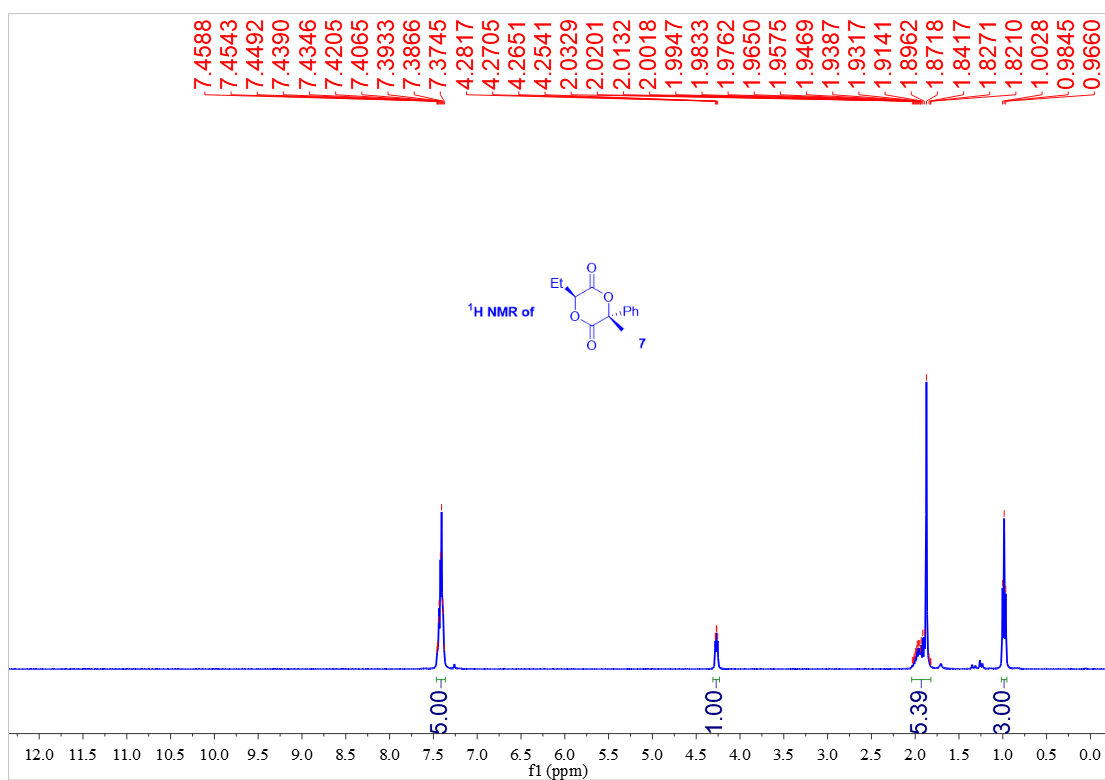

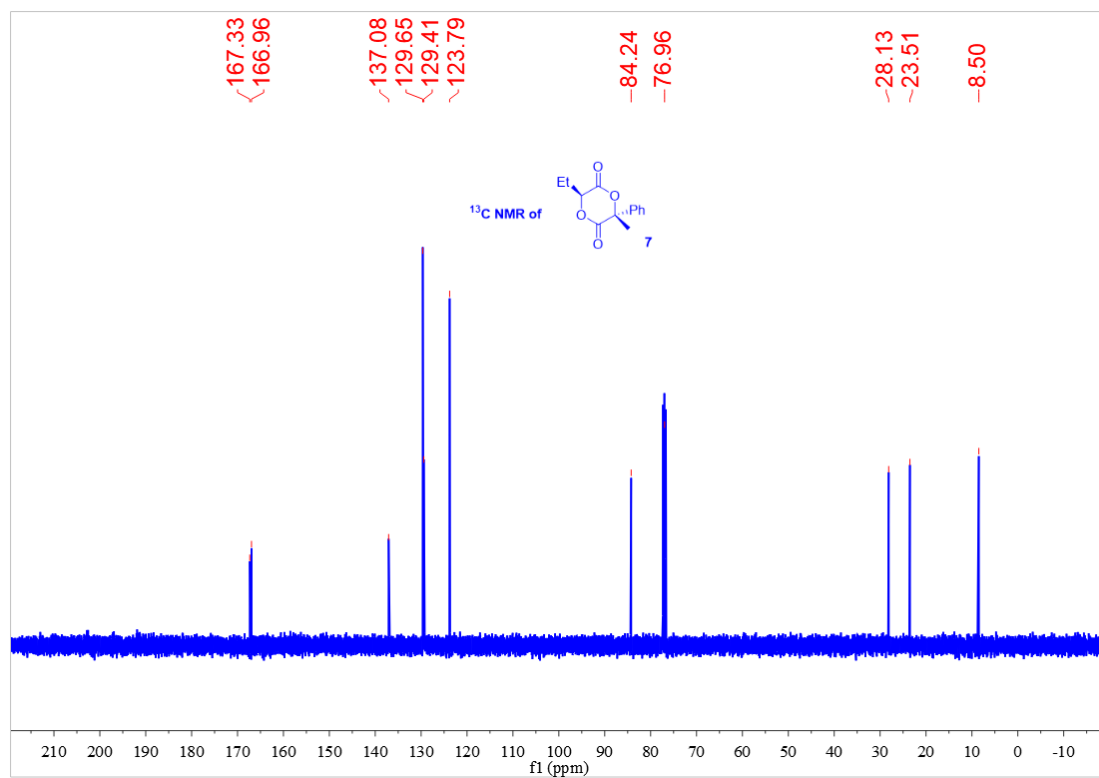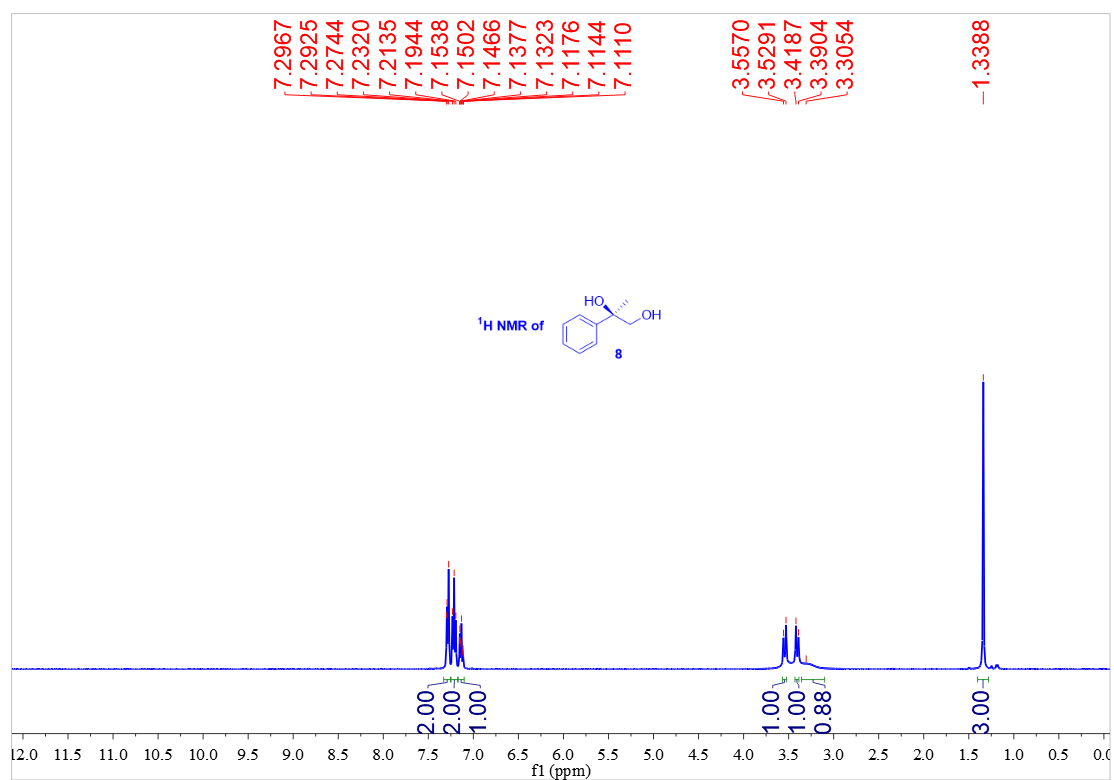

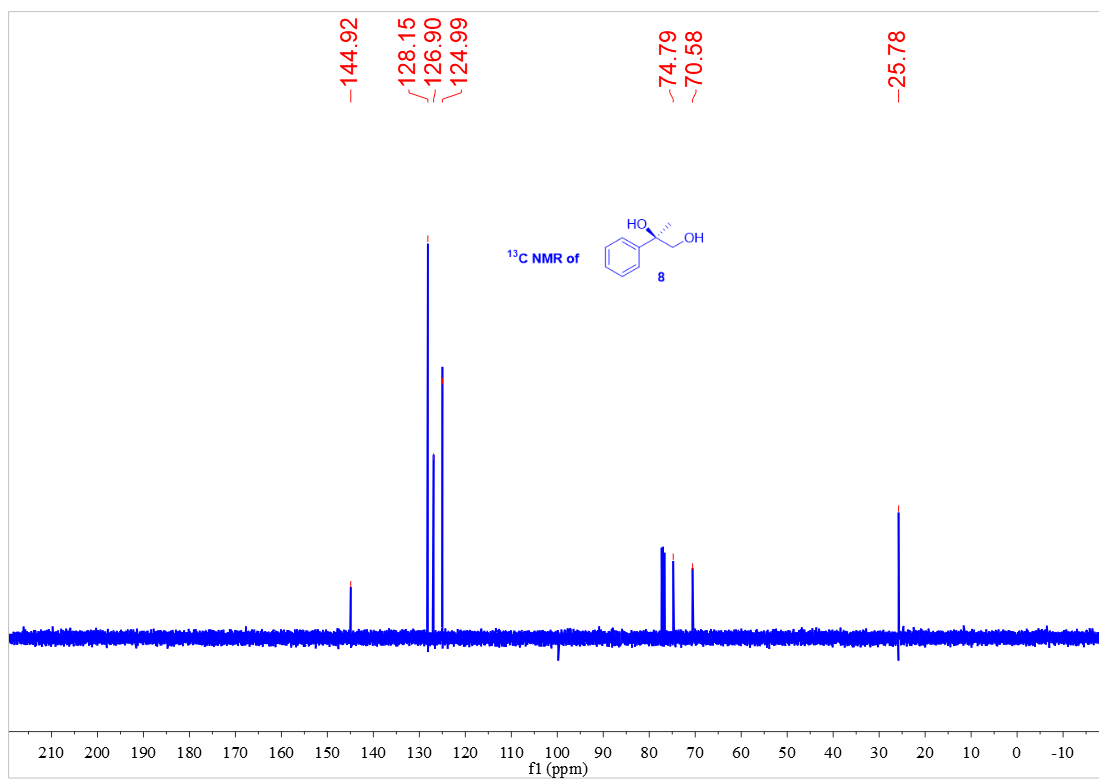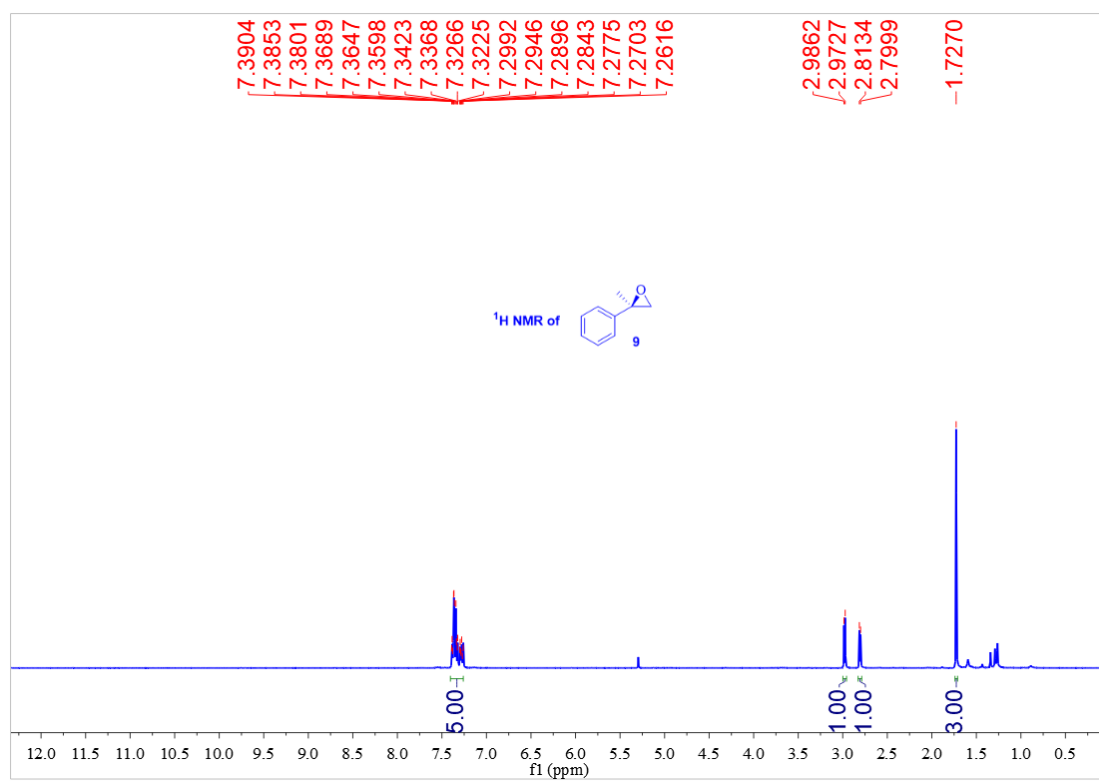

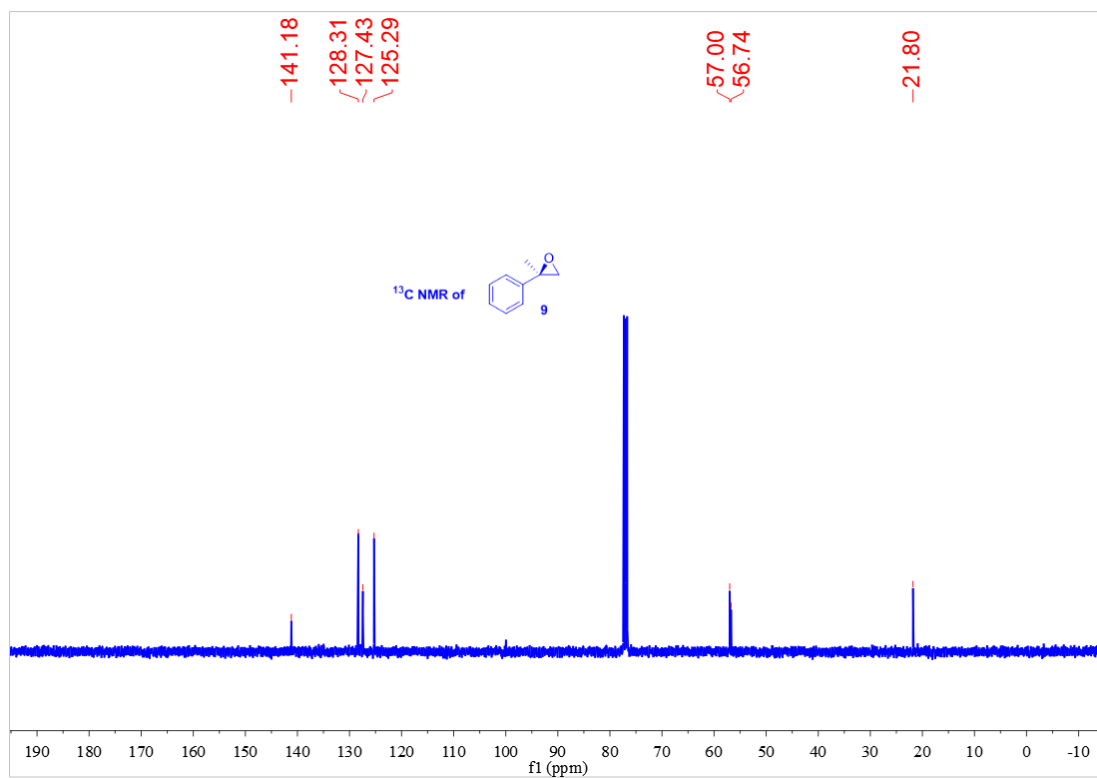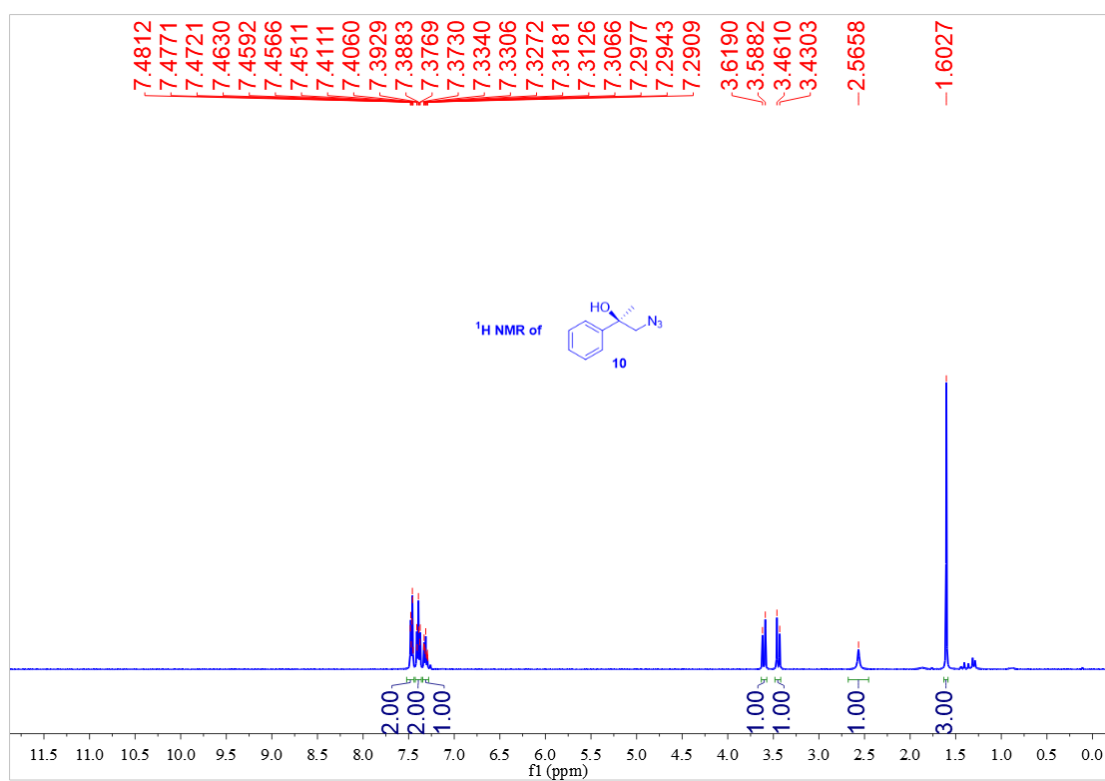

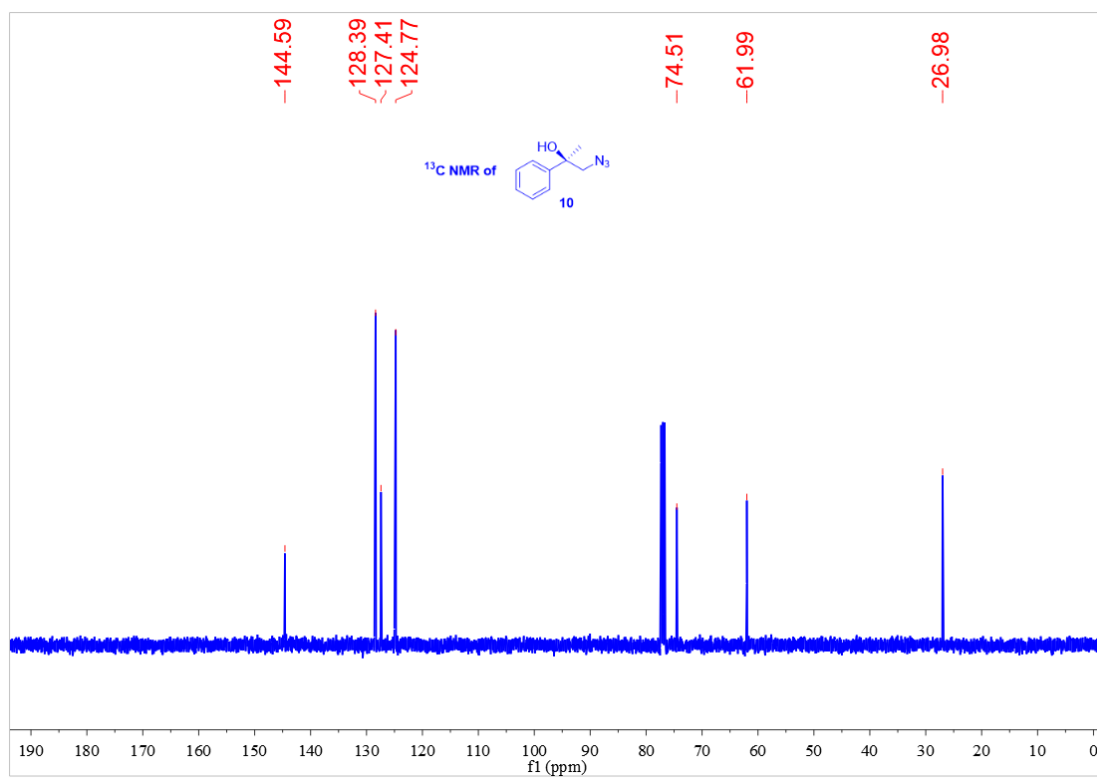

Supplement: d2sc05907j1.pdf [file d2sc05907j1.pdf]
